# Supplementary material for: Identification of Schlafen-11 as a Target of CD47 Signaling That Regulates Sensitivity to Ionizing Radiation and Topoisomerase Inhibitors
Source: Front Oncol. 2019 Oct 1;9:994. doi: 10.3389/fonc.2019.00994 (PMC6781860; doi:10.3389/fonc.2019.00994)
Supplement: Supplementary file 2 [file Table_1.XLSX]

## Sheet: 32_common in All 3 comparisons
Gene Symbol	p-value(JK_CD47siRNA vs. JK_Mock)	Fold-Change(JK_CD47siRNA vs. JK_Mock)	Fold-Change(JK_CD47siRNA vs. JK_Mock) (Description)	p-value(CD3+CD28+TSP1 * JINB8 vs. CD3+CD28+TSP1 * JK)	Fold-Change(CD3+CD28+TSP1 * JINB8 vs. CD3+CD28+TSP1 * JK)	Fold-Change(CD3+CD28+TSP1 * JINB8 vs. CD3+CD28+TSP1 * JK) (Description)	p-value(JINB8_UT vs. JK_UT)	Fold-Change(JINB8_UT vs. JK_UT)	Fold-Change(JINB8_UT vs. JK_UT) (Description)
ZNF738	0.0191642	-1.48916	JK_CD47siRNA down vs JK_Mock	2.31e-09	-123.884	CD3+CD28+TSP1 * JINB8 down vs CD3+CD28+TSP1 * JK	0.0134398	-400.096	JINB8_UT down vs JK_UT
PREX2	0.0108853	-1.661	JK_CD47siRNA down vs JK_Mock	4.99e-07	-39.7964	CD3+CD28+TSP1 * JINB8 down vs CD3+CD28+TSP1 * JK	0.0125596	-80.7328	JINB8_UT down vs JK_UT
DPYD	0.0331611	-1.30348	JK_CD47siRNA down vs JK_Mock	2.02e-08	-16.0116	CD3+CD28+TSP1 * JINB8 down vs CD3+CD28+TSP1 * JK	0.00349837	-32.1998	JINB8_UT down vs JK_UT
GBP1	0.0485285	-1.1653	JK_CD47siRNA down vs JK_Mock	8.01e-11	-13.954	CD3+CD28+TSP1 * JINB8 down vs CD3+CD28+TSP1 * JK	0.0091408	-14.2417	JINB8_UT down vs JK_UT
SPINK2	0.0100011	-1.46841	JK_CD47siRNA down vs JK_Mock	0.00018792	-12.9313	CD3+CD28+TSP1 * JINB8 down vs CD3+CD28+TSP1 * JK	0.0698561	-8.65001	JINB8_UT down vs JK_UT
DAAM2	0.0423162	-1.28679	JK_CD47siRNA down vs JK_Mock	0.000124384	-7.03592	CD3+CD28+TSP1 * JINB8 down vs CD3+CD28+TSP1 * JK	0.0372396	-14.5837	JINB8_UT down vs JK_UT
CASP1	0.0101638	-1.1885	JK_CD47siRNA down vs JK_Mock	2.79e-09	-4.62155	CD3+CD28+TSP1 * JINB8 down vs CD3+CD28+TSP1 * JK	0.00550269	-5.77164	JINB8_UT down vs JK_UT
GCA	0.00579302	-1.37997	JK_CD47siRNA down vs JK_Mock	5.13e-06	-4.27305	CD3+CD28+TSP1 * JINB8 down vs CD3+CD28+TSP1 * JK	0.0192215	-3.7418	JINB8_UT down vs JK_UT
TMEM71	0.00223757	-1.42465	JK_CD47siRNA down vs JK_Mock	0.00181874	-2.85433	CD3+CD28+TSP1 * JINB8 down vs CD3+CD28+TSP1 * JK	0.16217	-2.19443	JINB8_UT down vs JK_UT
UBASH3B	0.0136366	-1.25519	JK_CD47siRNA down vs JK_Mock	5.9e-05	-2.29593	CD3+CD28+TSP1 * JINB8 down vs CD3+CD28+TSP1 * JK	0.0996	-2.06336	JINB8_UT down vs JK_UT
SLFN11	0.0460869	-1.42978	JK_CD47siRNA down vs JK_Mock	0.000974405	-2.22088	CD3+CD28+TSP1 * JINB8 down vs CD3+CD28+TSP1 * JK	0.0195359	-2.50618	JINB8_UT down vs JK_UT
RARRES3	0.008139	-1.35414	JK_CD47siRNA down vs JK_Mock	1.43e-05	-2.1971	CD3+CD28+TSP1 * JINB8 down vs CD3+CD28+TSP1 * JK	0.0107254	-2.98036	JINB8_UT down vs JK_UT
ARHGAP9	0.0130587	-1.29066	JK_CD47siRNA down vs JK_Mock	3.16e-05	2.21296	CD3+CD28+TSP1 * JINB8 up vs CD3+CD28+TSP1 * JK	0.0145297	2.49031	JINB8_UT up vs JK_UT
TTLL1	0.0107468	-1.52417	JK_CD47siRNA down vs JK_Mock	0.000408848	2.22876	CD3+CD28+TSP1 * JINB8 up vs CD3+CD28+TSP1 * JK	0.0397544	2.4705	JINB8_UT up vs JK_UT
P2RX4	0.0254606	-1.32973	JK_CD47siRNA down vs JK_Mock	0.00210452	2.39168	CD3+CD28+TSP1 * JINB8 up vs CD3+CD28+TSP1 * JK	0.0810981	2.2556	JINB8_UT up vs JK_UT
IFITM1	0.00200076	-1.50953	JK_CD47siRNA down vs JK_Mock	0.000471405	2.43701	CD3+CD28+TSP1 * JINB8 up vs CD3+CD28+TSP1 * JK	0.0237921	3.68652	JINB8_UT up vs JK_UT
CTSW	0.00183496	-1.60176	JK_CD47siRNA down vs JK_Mock	9.38e-05	2.44255	CD3+CD28+TSP1 * JINB8 up vs CD3+CD28+TSP1 * JK	0.0208979	2.99428	JINB8_UT up vs JK_UT
CAPG	5.1e-05	-1.38698	JK_CD47siRNA down vs JK_Mock	4.63e-06	2.65066	CD3+CD28+TSP1 * JINB8 up vs CD3+CD28+TSP1 * JK	0.0147506	3.58599	JINB8_UT up vs JK_UT
STAT5B	0.0317596	-1.50564	JK_CD47siRNA down vs JK_Mock	0.00118859	2.68355	CD3+CD28+TSP1 * JINB8 up vs CD3+CD28+TSP1 * JK	0.102812	2.5169	JINB8_UT up vs JK_UT
SEMA4A	0.0430346	-1.41196	JK_CD47siRNA down vs JK_Mock	9.81e-06	2.93106	CD3+CD28+TSP1 * JINB8 up vs CD3+CD28+TSP1 * JK	0.0375983	2.86378	JINB8_UT up vs JK_UT
TMEM154	0.00232542	-1.81861	JK_CD47siRNA down vs JK_Mock	0.00191988	3.01813	CD3+CD28+TSP1 * JINB8 up vs CD3+CD28+TSP1 * JK	0.126737	2.4905	JINB8_UT up vs JK_UT
MBP	0.0440262	-1.19267	JK_CD47siRNA down vs JK_Mock	0.000157438	3.06744	CD3+CD28+TSP1 * JINB8 up vs CD3+CD28+TSP1 * JK	0.0889158	2.68619	JINB8_UT up vs JK_UT
ZNF792	0.0176282	-1.3156	JK_CD47siRNA down vs JK_Mock	0.000420274	4.08633	CD3+CD28+TSP1 * JINB8 up vs CD3+CD28+TSP1 * JK	0.103677	3.01914	JINB8_UT up vs JK_UT
TXNIP	0.0377733	-2.06744	JK_CD47siRNA down vs JK_Mock	6.8e-07	4.40317	CD3+CD28+TSP1 * JINB8 up vs CD3+CD28+TSP1 * JK	0.0238878	4.08962	JINB8_UT up vs JK_UT
RAB37	0.00316929	-1.22045	JK_CD47siRNA down vs JK_Mock	0.000861498	4.638	CD3+CD28+TSP1 * JINB8 up vs CD3+CD28+TSP1 * JK	0.056701	5.63942	JINB8_UT up vs JK_UT
ACTN1	0.00522406	-1.90535	JK_CD47siRNA down vs JK_Mock	3.68e-05	4.9382	CD3+CD28+TSP1 * JINB8 up vs CD3+CD28+TSP1 * JK	0.147509	3.14639	JINB8_UT up vs JK_UT
FAM101B	0.014564	-1.68621	JK_CD47siRNA down vs JK_Mock	3.03e-09	4.95389	CD3+CD28+TSP1 * JINB8 up vs CD3+CD28+TSP1 * JK	0.0371851	4.31671	JINB8_UT up vs JK_UT
RAP1GAP2	0.0106856	1.38591	JK_CD47siRNA up vs JK_Mock	0.00132083	5.66762	CD3+CD28+TSP1 * JINB8 up vs CD3+CD28+TSP1 * JK	0.104248	4.56688	JINB8_UT up vs JK_UT
PLEK	0.0305831	-1.20518	JK_CD47siRNA down vs JK_Mock	4.93e-06	5.91208	CD3+CD28+TSP1 * JINB8 up vs CD3+CD28+TSP1 * JK	0.0127405	8.88391	JINB8_UT up vs JK_UT
KCNK1	0.0149455	1.19911	JK_CD47siRNA up vs JK_Mock	1.84e-05	6.62127	CD3+CD28+TSP1 * JINB8 up vs CD3+CD28+TSP1 * JK	0.0501789	7.34378	JINB8_UT up vs JK_UT
SIRPG	0.0377152	-1.62952	JK_CD47siRNA down vs JK_Mock	0.000126336	6.98779	CD3+CD28+TSP1 * JINB8 up vs CD3+CD28+TSP1 * JK	0.0251862	9.00205	JINB8_UT up vs JK_UT
PLXND1	0.0446214	1.22673	JK_CD47siRNA up vs JK_Mock	2.64e-07	9.33439	CD3+CD28+TSP1 * JINB8 up vs CD3+CD28+TSP1 * JK	0.052495	5.90503	JINB8_UT up vs JK_UT
