# Supplementary material for: Identification of Schlafen-11 as a Target of CD47 Signaling That Regulates Sensitivity to Ionizing Radiation and Topoisomerase Inhibitors
Source: Front Oncol. 2019 Oct 1;9:994. doi: 10.3389/fonc.2019.00994 (PMC6781860; doi:10.3389/fonc.2019.00994)
Supplement: Supplementary file 3 [file Table_2.XLSX]

## Sheet: CD47 KO Jurkat MIPE Mar2014
Protocol Name	Sample ID	Name	Target	Curve Class2 CD47 KO	AC50(uM) CD47 KO	Max Resp CD47 KO	Log AC50 CD47 KO	Protocol Name	Sample ID	Curve Class2 WT	AC50(uM) WT	Max Resp WT	Log AC50 WT	Delta LogAC50 CD47KO-WT	Delta Max Resp CD47KO -WT	z-score Delta Max Resp CD47KO-WT
s-cd47-CD47-1	NCGC00161825-02	GSK-3965	ABCA1	-2.2	20.931	25.557	-4.6792	s-cd47-WT_JUR-1	NCGC00161825-02	-2.1	18.6548	5.091	-4.7292	0.05	20.466	0.956814	4.78575
s-cd47-CD47-1	NCGC00346448-01	Tariquidar	ABCBA	-3	23.485	74.331	-4.6292	s-cd47-WT_JUR-1	NCGC00346448-01	4	26.3506	90.988	-4.5792	-0.05	-16.657	-1.30844	16.388
s-cd47-CD47-1	NCGC00263219-01	Elacridar	ABCBA	4	9.3495	73.494	-5.0292	s-cd47-WT_JUR-1	NCGC00263219-01	1.2	0.0019	89.922	-8.7292	3.7	-16.428	-1.29447
s-cd47-CD47-1	NCGC00346735-01	Cinchonine dihydrochloride	ABCBA	-2.2	20.931	29.542	-4.6792	s-cd47-WT_JUR-1	NCGC00346735-01	-2.1	23.485	29.491	-4.6292	-0.05	0.051	-0.288916
s-cd47-CD47-1	NCGC00274062-01	Zosuquidar trihydrochloride	ABCBA	-2.2	20.931	39.638	-4.6792	s-cd47-WT_JUR-1	NCGC00274062-01	-2.1	20.931	17.315	-4.6792	0	22.323	1.07013
s-cd47-CD47-1	NCGC00091057-06	Silybin	ABCBA	-2.2	16.6261	40.999	-4.7792	s-cd47-WT_JUR-1	NCGC00091057-06	-2.1	16.6261	13.77	-4.7792	0	27.229	1.3695
s-cd47-CD47-1	NCGC00346894-01	Valspodar	ABCBA	4	37.2212	83.876	-4.4292	s-cd47-WT_JUR-1	NCGC00346894-01	-3	37.2212	56.155	-4.4292	0	27.721	1.39952
s-cd47-CD47-1	NCGC00016925-10	Omeprazole	ABCC3	-3	26.3506	14.643	-4.5792	s-cd47-WT_JUR-1	NCGC00016925-10	1.4	0.0023	85.18	-8.6292	4.05	-70.537	-4.59622
s-cd47-CD47-1	NCGC00183285-04	Nilotinib	ABL1	-2.1	10.4904	6.782	-4.9792	s-cd47-WT_JUR-1	NCGC00183285-04	-2.1	10.4904	18.545	-4.9792	0	-11.763	-1.00981
s-cd47-CD47-1	NCGC00346808-01	GNF 2	ABL1	-2.2	16.6261	48.549	-4.7792	s-cd47-WT_JUR-1	NCGC00346808-01	-3	26.3506	57.438	-4.5792	-0.2	-8.889	-0.834438
s-cd47-CD47-1	NCGC00159456-06	Imatinib	ABL1	-3	26.3506	26.386	-4.5792	s-cd47-WT_JUR-1	NCGC00159456-06	-3	33.1734	33.543	-4.4792	-0.1	-7.157	-0.728751
s-cd47-CD47-1	NCGC00241107-03	Bosutinib	ABL1	-2.1	18.6548	3.279	-4.7292	s-cd47-WT_JUR-1	NCGC00241107-03	-2.1	16.6261	3.129	-4.7792	0.05	0.15	-0.282875
s-cd47-CD47-1	NCGC00181129-05	Dasatinib	ABL1	-2.1	18.6548	33.528	-4.7292	s-cd47-WT_JUR-1	NCGC00181129-05	-2.2	20.931	32.093	-4.6792	-0.05	1.435	-0.204464
s-cd47-CD47-1	NCGC00346956-01	HMSL10015	ABL1	-2.1	14.818	16.954	-4.8292	s-cd47-WT_JUR-1	NCGC00346956-01	-2.1	5.8992	4.211	-5.2292	0.4	12.743	0.485554
s-cd47-CD47-1	NCGC00263172-01	DCC-2036	ABL1	-1.2	4.1763	41.19	-5.3792	s-cd47-WT_JUR-1	NCGC00263172-01	-1.1	9.3495	3.812	-5.0292	-0.35	37.378	1.98879
s-cd47-CD47-1	NCGC00346569-01	KW-2449	ABL1, FLT3	-3	33.1734	38.404	-4.4792	s-cd47-WT_JUR-1	NCGC00346569-01	-2.2	23.485	63.066	-4.6292	0.15	-24.662	-1.79691
s-cd47-CD47-1	NCGC00346514-01	Bafetinib	ABL1, LYN	-2.1	18.6548	1.872	-4.7292	s-cd47-WT_JUR-1	NCGC00346514-01	-2.1	16.6261	2.665	-4.7792	0.05	-0.793	-0.340417
s-cd47-CD47-1	NCGC00263235-01	ACC1 BMS	ACACA	-2.2	11.7704	42.148	-4.9292	s-cd47-WT_JUR-1	NCGC00263235-01	-2.2	16.6261	52.351	-4.7792	-0.15	-10.203	-0.914619
s-cd47-CD47-1	NCGC00165740-04	Benzapril	ACE	-2.1	18.6548	0.338	-4.7292	s-cd47-WT_JUR-1	NCGC00165740-04	-2.3	16.6261	1.634	-4.7792	0.05	-1.296	-0.371111
s-cd47-CD47-1	NCGC00178127-04	Ramipril	ACE	-2.1	16.6261	1.443	-4.7792	s-cd47-WT_JUR-1	NCGC00178127-04	-2.1	16.6261	2.536	-4.7792	0	-1.093	-0.358724
s-cd47-CD47-1	NCGC00159509-02	Perindopril	ACE	-3	37.2212	83.885	-4.4292	s-cd47-WT_JUR-1	NCGC00159509-02	4	18.6548	83.511	-4.7292	0.3	0.374	-0.269207
s-cd47-CD47-1	NCGC00181345-01	Temocapril hydrochloride	ACE	-2.1	16.6261	5.808	-4.7792	s-cd47-WT_JUR-1	NCGC00181345-01	-1.1	10.4904	1.918	-4.9792	0.2	3.89	-0.0546591
s-cd47-CD47-1	NCGC00021569-08	Enalapril maleate	ACE	4	0.0083	117.109	-8.0792	s-cd47-WT_JUR-1	NCGC00021569-08	4		101.744		-8.0792	15.365	0.64555
s-cd47-CD47-1	NCGC00182037-01	Alacepril	ACE	4		123.589		s-cd47-WT_JUR-1	NCGC00182037-01	4		107.464		0	16.125	0.691925
s-cd47-CD47-1	NCGC00163246-01	Huperizine A	ACHE	-3	23.485	80.378	-4.6292	s-cd47-WT_JUR-1	NCGC00163246-01	4	14.818	105.007	-4.8292	0.2	-24.629	-1.7949
s-cd47-CD47-1	NCGC00167531-03	Rivastigmine tartrate	ACHE	4	14.818	111.725	-4.8292	s-cd47-WT_JUR-1	NCGC00167531-03	4	6.619	109.072	-5.1792	0.35	2.653	-0.130141
s-cd47-CD47-1	NCGC00015054-06	Tacrine hydrochloride	ACHE	4	8.3328	109.992	-5.0792	s-cd47-WT_JUR-1	NCGC00015054-06	4		107.268		-5.0792	2.724	-0.125809
s-cd47-CD47-1	NCGC00017256-08	Galantamine hydrobromide	ACHE	-3	37.2212	64.98	-4.4292	s-cd47-WT_JUR-1	NCGC00017256-08	-2.2	23.485	53.299	-4.6292	0.2	11.681	0.420751
s-cd47-CD47-1	NCGC00182045-02	Pentostatin	ADA	4	0.4176	94.594	-6.3792	s-cd47-WT_JUR-1	NCGC00182045-02	4	0.0105	99.731	-7.9792	1.6	-5.137	-0.60549
s-cd47-CD47-1	NCGC00022567-08	Cladribine	ADA	-2.2	1.049	59.738	-5.9792	s-cd47-WT_JUR-1	NCGC00022567-08	-1.3	0.1482	21.67	-6.8292	0.85	38.068	2.03089
s-cd47-CD47-1	NCGC00015646-04	Fomepizole	ADH1	-1.2	0.0743	78.924	-7.1292	s-cd47-WT_JUR-1	NCGC00015646-04	-2.2	1.177	87.955	-5.9292	-1.2	-9.031	-0.843103
s-cd47-CD47-1	NCGC00163532-01	Daidzin	ADH1	4	0.0372	144.949	-7.4292	s-cd47-WT_JUR-1	NCGC00163532-01	4	0.0047	115.579	-8.3292	0.9	29.37	1.50014
s-cd47-CD47-1	NCGC00162423-04	Mithramycin	ADH1A	4	0.0235	23.104	-7.6292	s-cd47-WT_JUR-1	NCGC00162423-04	-1.2	0.0372	3.026	-7.4292	-0.2	20.078	0.933138
s-cd47-CD47-1	NCGC00263211-01	JK 184	ADH7	-1.2	0.0059	39.212	-8.2292	s-cd47-WT_JUR-1	NCGC00263211-01	-1.1	0.0033	13.602	-8.4792	0.25	25.61	1.2707
s-cd47-CD47-1	NCGC00092381-03	ABT-702	ADK	-2.1	26.3506	33.036	-4.5792	s-cd47-WT_JUR-1	NCGC00092381-03	-2.2	23.485	42.809	-4.6292	0.05	-9.773	-0.88838
s-cd47-CD47-1	NCGC00018117-23	Theophyllamine	ADORA1	4		120.661		s-cd47-WT_JUR-1	NCGC00018117-23	4		105.425		0	15.236	0.637678
s-cd47-CD47-1	NCGC00023673-08	Adenosine	ADORA1	-2.1	20.931	25.452	-4.6792	s-cd47-WT_JUR-1	NCGC00023673-08	-2.1	20.931	6.061	-4.6792	0	19.391	0.891218
s-cd47-CD47-1	NCGC00263139-01	Rolofylline	ADORA1	-3	18.6548	84.234	-4.7292	s-cd47-WT_JUR-1	NCGC00263139-01	-2.2	20.931	61.315	-4.6792	-0.05	22.919	1.1065
s-cd47-CD47-1	NCGC00024976-04	CGS-21680	ADORA2	4		104.02		s-cd47-WT_JUR-1	NCGC00024976-04	4		104.61		0	-0.59	-0.32803
s-cd47-CD47-1	NCGC00253737-01	Istradefylline	ADORA2A	-3	20.931	68.175	-4.6792	s-cd47-WT_JUR-1	NCGC00253737-01	-2.4	26.3506	84.375	-4.5792	-0.1	-16.2	-1.28056
s-cd47-CD47-1	NCGC00345800-01	CVT-6883	ADORA2B	-2.4	11.7704	90.746	-4.9292	s-cd47-WT_JUR-1	NCGC00345800-01	-2.4	13.2066	75.451	-4.8792	-0.05	15.295	0.641278
s-cd47-CD47-1	NCGC00165880-04	Reversine	ADORA3	-1.1	8.3328	3.459	-5.0792	s-cd47-WT_JUR-1	NCGC00165880-04	-2.1	11.7704	10.546	-4.9292	-0.15	-7.087	-0.72448
s-cd47-CD47-1	NCGC00015718-06	Naftopidil	ADRA1A	-2.2	18.6548	64.208	-4.7292	s-cd47-WT_JUR-1	NCGC00015718-06	-2.2	14.818	86.135	-4.8292	0.1	-21.927	-1.63002
s-cd47-CD47-1	NCGC00095152-07	Alfuzosin hydrochloride	ADRA1A	4	0.0017	86.459	-8.7792	s-cd47-WT_JUR-1	NCGC00095152-07	1.4	0.0017	101.772	-8.7792	0	-15.313	-1.22643
s-cd47-CD47-1	NCGC00016026-11	Terazosin hydrochloride	ADRA1A	4	26.3506	82.813	-4.5792	s-cd47-WT_JUR-1	NCGC00016026-11	1.1	0.0012	97.494	-8.9292	4.35	-14.681	-1.18787
s-cd47-CD47-1	NCGC00015766-08	Oxymetazoline hydrochloride	ADRA1A	1.4	0.0019	103.901	-8.7292	s-cd47-WT_JUR-1	NCGC00015766-08	4		116.341		-8.7292	-12.44	-1.05112
s-cd47-CD47-1	NCGC00016740-19	Prazosin hydrochloride	ADRA1A	-1.1	9.3495	0.186	-5.0292	s-cd47-WT_JUR-1	NCGC00016740-19	-1.1	10.4904	1.712	-4.9792	-0.05	-1.526	-0.385145
s-cd47-CD47-1	NCGC00346740-01	Tamsulosin hydrochloride	ADRA1A	4	7.4266	97.768	-5.1292	s-cd47-WT_JUR-1	NCGC00346740-01	4		99.219		-5.1292	-1.451	-0.380569
s-cd47-CD47-1	NCGC00188863-01	Dronedarone	ADRA1A	1.3	0.0105	1.6	-7.9792	s-cd47-WT_JUR-1	NCGC00188863-01	-2.1	11.7704	2.419	-4.9292	-3.05	-0.819	-0.342004
s-cd47-CD47-1	NCGC00159406-11	Noradrenaline bitartrate monohydrate	ADRA1A	4	0.2635	94.105	-6.5792	s-cd47-WT_JUR-1	NCGC00159406-11	4	14.818	93.306	-4.8292	-1.75	0.799	-0.243273
s-cd47-CD47-1	NCGC00015268-05	Clonidine	ADRA1A	4		114.875		s-cd47-WT_JUR-1	NCGC00015268-05	4		113.431		0	1.444	-0.203915
s-cd47-CD47-1	NCGC00142615-03	Epinephrine	ADRA1A	-2.1	34.0429	4.704	-4.468	s-cd47-WT_JUR-1	NCGC00142615-03	-1.1	17.0619	3.103	-4.768	0.3	1.601	-0.194335
s-cd47-CD47-1	NCGC00346558-01	Silodosin	ADRA1A	4	18.6548	85.493	-4.7292	s-cd47-WT_JUR-1	NCGC00346558-01	4	5.2576	83.748	-5.2792	0.55	1.745	-0.185548
s-cd47-CD47-1	NCGC00024257-07	Phenylephrine hydrochloride	ADRA1A	4	0.0037	118.677	-8.4292	s-cd47-WT_JUR-1	NCGC00024257-07	4	0.0012	110.754	-8.9292	0.5	7.923	0.191436
s-cd47-CD47-1	NCGC00018158-08	Doxazosin mesylate	ADRA1A	-2.1	20.931	11.99	-4.6792	s-cd47-WT_JUR-1	NCGC00018158-08	-3	29.5659	3.424	-4.5292	-0.15	8.566	0.230672
s-cd47-CD47-1	NCGC00015924-13	Synephrine	ADRA1A	4	0.1177	115.709	-6.9292	s-cd47-WT_JUR-1	NCGC00015924-13	4	0.0074	106.33	-8.1292	1.2	9.379	0.280282
s-cd47-CD47-1	NCGC00016311-16	Phentolamine mesilate	ADRA1A	4	0.1177	97.155	-6.9292	s-cd47-WT_JUR-1	NCGC00016311-16	-2.4	37.2212	80.459	-4.4292	-2.5	16.696	0.726768
s-cd47-CD47-1	NCGC00016101-09	Xylometazoline hydrochloride	ADRA2A	1.4	0.0053	88.34	-8.2792	s-cd47-WT_JUR-1	NCGC00016101-09	4		106.209		-8.2792	-17.869	-1.3824
s-cd47-CD47-1	NCGC00025018-09	Yohimbine	ADRA2A	4	0.0469	101.271	-7.3292	s-cd47-WT_JUR-1	NCGC00025018-09	1.4	0.0021	115.32	-8.6792	1.35	-14.049	-1.1493
s-cd47-CD47-1	NCGC00160529-05	Tizanidine hydrochloride	ADRA2A	1.3	0.0372	95.539	-7.4292	s-cd47-WT_JUR-1	NCGC00160529-05	1.2	0.0019	108.284	-8.7292	1.3	-12.745	-1.06973
s-cd47-CD47-1	NCGC00016035-12	Trazodone hydrochloride	ADRA2A	4	14.818	81.931	-4.8292	s-cd47-WT_JUR-1	NCGC00016035-12	4	37.2212	84.001	-4.4292	-0.4	-2.07	-0.41834
s-cd47-CD47-1	NCGC00167832-04	Carvedilol	ADRB1	-2.2	18.6548	78.391	-4.7292	s-cd47-WT_JUR-1	NCGC00167832-04	4		96.819		-4.7292	-18.428	-1.41651
s-cd47-CD47-1	NCGC00015919-04	Sotalol	ADRB1	4		120.138		s-cd47-WT_JUR-1	NCGC00015919-04	4	13.2066	129.566	-4.8792	4.8792	-9.428	-0.867328
s-cd47-CD47-1	NCGC00024868-08	Bisoprolol	ADRB1	4		97.125		s-cd47-WT_JUR-1	NCGC00024868-08	4	0.2635	99.751	-6.5792	6.5792	-2.626	-0.452268
s-cd47-CD47-1	NCGC00015159-06	Betaxolol hydrochloride	ADRB1	4		116.049		s-cd47-WT_JUR-1	NCGC00015159-06	4		118.008		0	-1.959	-0.411567
s-cd47-CD47-1	NCGC00183875-01	Nebivolol	ADRB1	-2.1	20.931	1.823	-4.6792	s-cd47-WT_JUR-1	NCGC00183875-01	-2.1	26.3506	1.2	-4.5792	-0.1	0.623	-0.254013
s-cd47-CD47-1	NCGC00346470-01	Zilpaterol	ADRB1	-2.2	9.3495	43.826	-5.0292	s-cd47-WT_JUR-1	NCGC00346470-01	-2.2	13.2066	38.535	-4.8792	-0.15	5.291	0.0308304
s-cd47-CD47-1	NCGC00015321-04	Dobutamine hydrochloride	ADRB1	-2.2	16.6261	40.55	-4.7792	s-cd47-WT_JUR-1	NCGC00015321-04	-2.1	11.7704	8.698	-4.9292	0.15	31.852	1.65159
s-cd47-CD47-1	NCGC00015558-06	Isoprenaline hydrochloride	ADRB1	-2.2	16.6261	53.781	-4.7792	s-cd47-WT_JUR-1	NCGC00015558-06	-2.1	18.6548	7.997	-4.7292	-0.05	45.784	2.50173
s-cd47-CD47-1	NCGC00015887-05	Ritodrine hydrochloride	ADRB2	4	41.7629	99.92	-4.3792	s-cd47-WT_JUR-1	NCGC00015887-05	4	0.1049	106.382	-6.9792	2.6	-6.462	-0.686342
s-cd47-CD47-1	NCGC00024999-02	Procaterol hydrochloride	ADRB2	4		113.087		s-cd47-WT_JUR-1	NCGC00024999-02	4		117.344		0	-4.257	-0.551792
s-cd47-CD47-1	NCGC00015955-09	Salbutamol sulfate	ADRB2	4	13.2066	111.792	-4.8792	s-cd47-WT_JUR-1	NCGC00015955-09	4		112.076		-4.8792	-0.284	-0.309358
s-cd47-CD47-1	NCGC00095150-07	Telmisartan	AGT	-3	37.2212	54.525	-4.4292	s-cd47-WT_JUR-1	NCGC00095150-07	-2.2	26.3506	63.434	-4.5792	0.15	-8.909	-0.835659
s-cd47-CD47-1	NCGC00246968-02	Olmesartan	AGT	4	0.2635	104.675	-6.5792	s-cd47-WT_JUR-1	NCGC00246968-02	4		102.002		-6.5792	2.673	-0.128921
s-cd47-CD47-1	NCGC00345785-01	Eprosartan mesylate	AGT	4		90.261		s-cd47-WT_JUR-1	NCGC00345785-01	-3	37.2212	63.38	-4.4292	4.4292	26.881	1.34826
s-cd47-CD47-1	NCGC00344564-02	Diosmin	AHR	-2.2	20.931	46.471	-4.6792	s-cd47-WT_JUR-1	NCGC00344564-02	-2.2	16.6261	56.219	-4.7792	0.1	-9.748	-0.886855
s-cd47-CD47-1	NCGC00263553-02	StemRegenin 1	AHR	-2.1	14.818	-1.728	-4.8292	s-cd47-WT_JUR-1	NCGC00263553-02	-2.1	16.6261	-0.116	-4.7792	-0.05	-1.612	-0.390393
s-cd47-CD47-1	NCGC00017245-12	Ellagic acid	AKR1B1	4	33.1734	89.022	-4.4792	s-cd47-WT_JUR-1	NCGC00017245-12	4	23.485	89.984	-4.6292	0.15	-0.962	-0.35073
s-cd47-CD47-1	NCGC00164613-03	Epalrestat	AKR1B1	4		97.936		s-cd47-WT_JUR-1	NCGC00164613-03	4	1.177	97.732	-5.9292	5.9292	0.204	-0.27958
s-cd47-CD47-1	NCGC00024631-01	EBPC	AKR1B1	4	0.0042	122.465	-8.3792	s-cd47-WT_JUR-1	NCGC00024631-01	4		100.134		-8.3792	22.331	1.07062
s-cd47-CD47-1	NCGC00094818-08	Hexestrol	AKR1C1	-1.2	1.177	53.135	-5.9292	s-cd47-WT_JUR-1	NCGC00094818-08	-1.2	1.3207	51.162	-5.8792	-0.05	1.973	-0.171635
s-cd47-CD47-1	NCGC00165727-02	AKT inhibitor VIII	AKT1	-2.1	18.6548	0.786	-4.7292	s-cd47-WT_JUR-1	NCGC00165727-02	-2.1	20.931	2.26	-4.6792	-0.05	-1.474	-0.381972
s-cd47-CD47-1	NCGC00345840-01	Merck-22-6	AKT1	-1.1	3.3173	-0.939	-5.4792	s-cd47-WT_JUR-1	NCGC00345840-01	-1.1	5.2576	0.225	-5.2792	-0.2	-1.164	-0.363056
s-cd47-CD47-1	NCGC00263181-01	GSK-690693	AKT1	-1.1	0.0264	24.053	-7.5792	s-cd47-WT_JUR-1	NCGC00263181-01	-1.2	0.0662	22.059	-7.1792	-0.4	1.994	-0.170354
s-cd47-CD47-1	NCGC00345856-01	AZD-26	AKT1	-2.2	13.2066	51.77	-4.8792	s-cd47-WT_JUR-1	NCGC00345856-01	-2.2	11.7704	49.148	-4.9292	0.05	2.622	-0.132033
s-cd47-CD47-1	NCGC00162073-05	H-89	AKT1	-2.1	20.931	14.164	-4.6792	s-cd47-WT_JUR-1	NCGC00162073-05	-2.1	23.485	6.398	-4.6292	-0.05	7.766	0.181856
s-cd47-CD47-1	NCGC00346621-01	CCT-128930	AKT1	-2.1	7.4266	18.863	-5.1292	s-cd47-WT_JUR-1	NCGC00346621-01	-2.1	18.6548	10.681	-4.7292	-0.4	8.182	0.20724
s-cd47-CD47-1	NCGC00346549-01	AT-7867	AKT1	-2.1	20.931	14.672	-4.6792	s-cd47-WT_JUR-1	NCGC00346549-01	-2.1	20.931	5.714	-4.6792	0	8.958	0.254592
s-cd47-CD47-1	NCGC00263147-01	A-674563	AKT1	-2.1	4.1763	10.166	-5.3792	s-cd47-WT_JUR-1	NCGC00263147-01	-1.1	3.3173	1.067	-5.4792	0.1	9.099	0.263196
s-cd47-CD47-1	NCGC00347278-01	A-443654	AKT1	-1.1	0.8333	12.002	-6.0792	s-cd47-WT_JUR-1	NCGC00347278-01	-1.1	1.3207	-0.02	-5.8792	-0.2	12.022	0.441558
s-cd47-CD47-1	NCGC00345823-01	Akt-I-1,2	AKT1	-2.1	20.931	18.392	-4.6792	s-cd47-WT_JUR-1	NCGC00345823-01	-2.1	23.485	4.973	-4.6292	-0.05	13.419	0.526804
s-cd47-CD47-1	NCGC00345795-01	AZD-5363	AKT1	-2.1	7.4266	25.014	-5.1292	s-cd47-WT_JUR-1	NCGC00345795-01	-2.1	0.1663	1.231	-6.7792	1.65	23.783	1.15922
s-cd47-CD47-1	NCGC00346450-01	Triciribine phosphate	AKT1	-1.4	0.5899	80.607	-6.2292	s-cd47-WT_JUR-1	NCGC00346450-01	-2.2	18.6548	52.513	-4.7292	-1.5	28.094	1.42228
s-cd47-CD47-1	NCGC00092314-04	Triciribine	AKT1	4		120.768		s-cd47-WT_JUR-1	NCGC00092314-04	-1.4	0.0166	92.368	-7.7792	7.7792	28.4	1.44095
s-cd47-CD47-1	NCGC00186465-01	MK-2206	AKT1	-2.2	14.818	30.241	-4.8292	s-cd47-WT_JUR-1	NCGC00186465-01	-2.1	20.931	1.791	-4.6792	-0.15	28.45	1.444
s-cd47-CD47-1	NCGC00346714-01	GDC-0068	AKT1	-2.1	0.4176	31.005	-6.3792	s-cd47-WT_JUR-1	NCGC00346714-01	-2.1	0.3317	2.029	-6.4792	0.1	28.976	1.4761
s-cd47-CD47-1	NCGC00345822-01	Akt-I-1	AKT1	-2.4	16.6261	72.553	-4.7792	s-cd47-WT_JUR-1	NCGC00345822-01	-1.1	2.3485	10.094	-5.6292	0.85	62.459	3.51924
s-cd47-CD47-1	NCGC00016000-10	Disulfiram	ALDH2	-2.3	26.3506	1.875	-4.5792	s-cd47-WT_JUR-1	NCGC00016000-10	-2.4	16.6261	3.206	-4.7792	0.2	-1.331	-0.373246
s-cd47-CD47-1	NCGC00238453-01	TAE-684	ALK	-2.3	26.3506	-0.2	-4.5792	s-cd47-WT_JUR-1	NCGC00238453-01	-2.3	26.3506	0.311	-4.5792	0	-0.511	-0.32321
s-cd47-CD47-1	NCGC00345791-01	ASP-3026	ALK	-2.1	37.2212	1.568	-4.4292	s-cd47-WT_JUR-1	NCGC00345791-01	-2.1	23.485	1.56	-4.6292	0.2	0.008	-0.29154
s-cd47-CD47-1	NCGC00346688-01	CH-5424802	ALK	-1.4	4.6859	69.325	-5.3292	s-cd47-WT_JUR-1	NCGC00346688-01	-1.4	4.1763	64.965	-5.3792	0.05	4.36	-0.0259795
s-cd47-CD47-1	NCGC00185053-01	NCGC00185053	ALOX15	4	3.3173	86.174	-5.4792	s-cd47-WT_JUR-1	NCGC00185053-01	4	11.7704	88.825	-4.9292	-0.55	-2.651	-0.453793
s-cd47-CD47-1	NCGC00159453-06	Zileuton	ALOX5	4		107.645		s-cd47-WT_JUR-1	NCGC00159453-06	4	20.931	95.91	-4.6792	4.6792	11.735	0.424046
s-cd47-CD47-1	NCGC00250374-01	Licofelone	ALOX5	-2.2	26.3506	32.374	-4.5792	s-cd47-WT_JUR-1	NCGC00250374-01	-2.1	18.6548	9.166	-4.7292	0.15	23.208	1.12413
s-cd47-CD47-1	NCGC00094201-01	Masoprocol	ALOX5	-2.1	14.818	31.706	-4.8292	s-cd47-WT_JUR-1	NCGC00094201-01	-2.1	11.7704	3.946	-4.9292	0.1	27.76	1.4019
s-cd47-CD47-1	NCGC00250411-01	Veliflapon	ALOX5AP	4	20.931	99.531	-4.6792	s-cd47-WT_JUR-1	NCGC00250411-01	-2.2	14.818	82.783	-4.8292	0.15	16.748	0.729941
s-cd47-CD47-1	NCGC00162249-04	MK-886	ALOX5AP	-2.2	20.931	40.805	-4.6792	s-cd47-WT_JUR-1	NCGC00162249-04	-2.1	20.931	13.757	-4.6792	0	27.048	1.35845
s-cd47-CD47-1	NCGC00346615-01	TAME	ANAPC1	4	0.0209	110.6	-7.6792	s-cd47-WT_JUR-1	NCGC00346615-01	4		110.437		-7.6792	0.163	-0.282082
s-cd47-CD47-1	NCGC00263175-01	Tosedostat	ANPEP	-2.2	16.6261	35.393	-4.7792	s-cd47-WT_JUR-1	NCGC00263175-01	-2.1	18.6548	25.488	-4.7292	-0.05	9.905	0.312378
s-cd47-CD47-1	NCGC00185090-03	NCGC00185090-04	APE1	-2.1	18.6548	4.029	-4.7292	s-cd47-WT_JUR-1	NCGC00185090-03	-2.1	26.3506	2.758	-4.5792	-0.15	1.271	-0.214471
s-cd47-CD47-1	NCGC00169145-02	Salidroside	APP	4	37.2212	79.13	-4.4292	s-cd47-WT_JUR-1	NCGC00169145-02	4	37.2212	86.981	-4.4292	0	-7.851	-0.771099
s-cd47-CD47-1	NCGC00263150-01	Andarine	AR	1.4	0.0019	72.736	-8.7292	s-cd47-WT_JUR-1	NCGC00263150-01	1.2	0.0019	87.796	-8.7292	0	-15.06	-1.21099
s-cd47-CD47-1	NCGC00015754-15	Nilutamide	AR	4	1.6626	79.728	-5.7792	s-cd47-WT_JUR-1	NCGC00015754-15	4	0.4686	93.535	-6.3292	0.55	-13.807	-1.13454
s-cd47-CD47-1	NCGC00263148-02	Abiraterone	AR	-2.4	8.1205	72.921	-5.0904	s-cd47-WT_JUR-1	NCGC00263148-02	4	1.1471	83.906	-5.9404	0.85	-10.985	-0.962337
s-cd47-CD47-1	NCGC00346736-01	Testosterone cypionate	AR	4		89.67		s-cd47-WT_JUR-1	NCGC00346736-01	4	0.0372	96.892	-7.4292	7.4292	-7.222	-0.732717
s-cd47-CD47-1	NCGC00346733-01	Testosterone	AR	4		83.314		s-cd47-WT_JUR-1	NCGC00346733-01	4	16.6261	90.35	-4.7792	4.7792	-7.036	-0.721368
s-cd47-CD47-1	NCGC00095245-01	Testosterone propionate	AR	1.2	0.0047	87.056	-8.3292	s-cd47-WT_JUR-1	NCGC00095245-01	4	0.0019	92.967	-8.7292	0.4	-5.911	-0.65272
s-cd47-CD47-1	NCGC00091032-08	Cyproterone acetate	AR	-3	33.1734	2.64	-4.4792	s-cd47-WT_JUR-1	NCGC00091032-08	-3	26.3506	7.341	-4.5792	0.1	-4.701	-0.578885
s-cd47-CD47-1	NCGC00095348-07	Diindolylmethane	AR	-1.1	4.1763	0.848	-5.3792	s-cd47-WT_JUR-1	NCGC00095348-07	-1.1	7.4266	2.168	-5.1292	-0.25	-1.32	-0.372575
s-cd47-CD47-1	NCGC00091014-06	Hydroxyflutamide	AR	-3	37.2212	5.726	-4.4292	s-cd47-WT_JUR-1	NCGC00091014-06	-3	33.1734	6.879	-4.4792	0.05	-1.153	-0.362385
s-cd47-CD47-1	NCGC00167977-03	Bicalutamide	AR	-1.1	1.049	2.038	-5.9792	s-cd47-WT_JUR-1	NCGC00167977-03	-1.1	1.3207	2.678	-5.8792	-0.1	-0.64	-0.331081
s-cd47-CD47-1	NCGC00346725-01	ARN-509	AR	-1.1	1.4818	0.351	-5.8292	s-cd47-WT_JUR-1	NCGC00346725-01	-1.1	2.9566	0.828	-5.5292	-0.3	-0.477	-0.321135
s-cd47-CD47-1	NCGC00015452-19	Flutamide	AR	-1.1	7.4266	3.159	-5.1292	s-cd47-WT_JUR-1	NCGC00015452-19	-1.1	10.4904	3.193	-4.9792	-0.15	-0.034	-0.294103
s-cd47-CD47-1	NCGC00093560-06	Finasteride	AR	-1.1	1.049	1.534	-5.9792	s-cd47-WT_JUR-1	NCGC00093560-06	-1.1	2.9566	1.479	-5.5292	-0.45	0.055	-0.288672
s-cd47-CD47-1	NCGC00167487-01	(R)-Bicalutamide	AR	-1.1	1.3207	2.45	-5.8792	s-cd47-WT_JUR-1	NCGC00167487-01	-1.1	2.6351	2.368	-5.5792	-0.3	0.082	-0.287025
s-cd47-CD47-1	NCGC00346499-01	Ostarine	AR	4	33.1734	65.338	-4.4792	s-cd47-WT_JUR-1	NCGC00346499-01	-3	37.2212	65.009	-4.4292	-0.05	0.329	-0.271953
s-cd47-CD47-1	NCGC00346468-01	17 alpha-propionate	AR	4	16.6261	100.657	-4.7792	s-cd47-WT_JUR-1	NCGC00346468-01	4	18.6548	99.835	-4.7292	-0.05	0.822	-0.24187
s-cd47-CD47-1	NCGC00263137-01	RD-162	AR	-2.1	23.485	5.875	-4.6292	s-cd47-WT_JUR-1	NCGC00263137-01	-3	33.1734	5.013	-4.4792	-0.15	0.862	-0.239429
s-cd47-CD47-1	NCGC00346711-01	Galeterone	AR	-2.2	20.931	20.505	-4.6792	s-cd47-WT_JUR-1	NCGC00346711-01	-2.1	23.485	12.947	-4.6292	-0.05	7.558	0.169164
s-cd47-CD47-1	NCGC00263120-01	MDV-3100	AR	4		111.671		s-cd47-WT_JUR-1	NCGC00263120-01	4	10.4904	102.281	-4.9792	4.9792	9.39	0.280953
s-cd47-CD47-1	NCGC00263207-01	QS11	ARF1	-1.2	1.6626	39.984	-5.7792	s-cd47-WT_JUR-1	NCGC00263207-01	-1.2	3.3173	48.081	-5.4792	-0.3	-8.097	-0.78611
s-cd47-CD47-1	NCGC00168109-01	Secin H3	ARHGEF1	4	1.049	108.777	-5.9792	s-cd47-WT_JUR-1	NCGC00168109-01	4	10.4904	101.923	-4.9792	-1	6.854	0.126205
s-cd47-CD47-1	NCGC00263099-01	CP-466722	ATM	-1.2	6.619	19.964	-5.1792	s-cd47-WT_JUR-1	NCGC00263099-01	-1.1	5.2576	29.769	-5.2792	0.1	-9.805	-0.890333
s-cd47-CD47-1	NCGC00263190-02	KU-0064	ATM	-3	23.485	41.607	-4.6292	s-cd47-WT_JUR-1	NCGC00263190-02	-2.1	18.6548	28.002	-4.7292	0.1	13.605	0.538154
s-cd47-CD47-1	NCGC00229735-03	KU-60019	ATM	-2.1	16.6261	30.579	-4.7792	s-cd47-WT_JUR-1	NCGC00229735-03	-2.1	16.6261	14.91	-4.7792	0	15.669	0.6641
s-cd47-CD47-1	NCGC00346444-01	VE-821	ATR	-1.2	4.6859	64.063	-5.3292	s-cd47-WT_JUR-1	NCGC00346444-01	-1.4	5.8992	17.653	-5.2292	-0.1	46.41	2.53993
s-cd47-CD47-1	NCGC00346526-01	PHA-680632	AURKA	-2.2	18.6548	49.853	-4.7292	s-cd47-WT_JUR-1	NCGC00346526-01	4	14.818	57.768	-4.8292	0.1	-7.915	-0.775004
s-cd47-CD47-1	NCGC00263203-02	Danusertib	AURKA	-2.4	20.931	51.822	-4.6792	s-cd47-WT_JUR-1	NCGC00263203-02	-2.2	13.2066	56.126	-4.8792	0.2	-4.304	-0.55466
s-cd47-CD47-1	NCGC00346525-01	Aurora A Inhibitor I	AURKA	-1.1	5.2576	0.029	-5.2792	s-cd47-WT_JUR-1	NCGC00346525-01	-1.1	3.3173	1.265	-5.4792	0.2	-1.236	-0.367449
s-cd47-CD47-1	NCGC00346676-01	CCT-137690	AURKA	-1.1	8.3328	0.028	-5.0792	s-cd47-WT_JUR-1	NCGC00346676-01	-1.1	8.3328	0.919	-5.0792	0	-0.891	-0.346397
s-cd47-CD47-1	NCGC00159574-02	ZM 44739	AURKA	-2.1	20.931	2.608	-4.6792	s-cd47-WT_JUR-1	NCGC00159574-02	-2.1	20.931	2.785	-4.6792	0	-0.177	-0.302829
s-cd47-CD47-1	NCGC00263178-01	ENMD-981693	AURKA	-2.1	42.8575	3.318	-4.368	s-cd47-WT_JUR-1	NCGC00263178-01	-2.1	15.2064	3.017	-4.818	0.45	0.301	-0.273661
s-cd47-CD47-1	NCGC00346539-01	CCT-129202	AURKA	-1.2	3.7221	68.519	-5.4292	s-cd47-WT_JUR-1	NCGC00346539-01	-1.4	3.3173	68.177	-5.4792	0.05	0.342	-0.271159
s-cd47-CD47-1	NCGC00346542-01	Hesperadin	AURKA	-2.1	18.6548	5.655	-4.7292	s-cd47-WT_JUR-1	NCGC00346542-01	-2.1	18.6548	1.227	-4.7292	0	4.428	-0.0218302
s-cd47-CD47-1	NCGC00346488-01	MLN-8054	AURKA	-2.2	23.485	24.73	-4.6292	s-cd47-WT_JUR-1	NCGC00346488-01	-2.3	26.3506	15.857	-4.5792	-0.05	8.873	0.249405
s-cd47-CD47-1	NCGC00168110-01	Tozasertib	AURKA	-2.2	16.6261	45.521	-4.7792	s-cd47-WT_JUR-1	NCGC00168110-01	-2.2	13.2066	36.308	-4.8792	0.1	9.213	0.270152
s-cd47-CD47-1	NCGC00263204-01	CYC-116	AURKA	-2.1	9.3495	19.471	-5.0292	s-cd47-WT_JUR-1	NCGC00263204-01	-2.1	16.6261	9.906	-4.7792	-0.25	9.565	0.291631
s-cd47-CD47-1	NCGC00263089-02	AZD-1152-HQPA	AURKA	4	1.049	100.567	-5.9792	s-cd47-WT_JUR-1	NCGC00263089-02	4		84.946		-5.9792	15.621	0.661171
s-cd47-CD47-1	NCGC00346493-01	AT-9283	AURKA	-1.2	4.1763	24.648	-5.3792	s-cd47-WT_JUR-1	NCGC00346493-01	-1.1	6.619	2.937	-5.1792	-0.2	21.711	1.03278
s-cd47-CD47-1	NCGC00346652-01	PF-03814735	AURKA	-2.1	7.4266	25.285	-5.1292	s-cd47-WT_JUR-1	NCGC00346652-01	-2.3	23.485	2.512	-4.6292	-0.5	22.773	1.09759
s-cd47-CD47-1	NCGC00263271-02	Alisertib	AURKA	4	1.177	53.002	-5.9292	s-cd47-WT_JUR-1	NCGC00263271-02	-2.2	14.818	28.645	-4.8292	-1.1	24.357	1.19424
s-cd47-CD47-1	NCGC00263094-01	AMG-900	AURKA	-2.2	16.6261	52.081	-4.7792	s-cd47-WT_JUR-1	NCGC00263094-01	-2.2	11.7704	26.057	-4.9292	0.15	26.024	1.29597
s-cd47-CD47-1	NCGC00242482-01	SNS-314	AURKA	-2.2	10.4904	60.794	-4.9792	s-cd47-WT_JUR-1	NCGC00242482-01	-2.2	8.3328	31.863	-5.0792	0.1	28.931	1.47335
s-cd47-CD47-1	NCGC00346645-01	TAK-901	AURKA	-1.2	4.1763	33.892	-5.3792	s-cd47-WT_JUR-1	NCGC00346645-01	-1.1	4.1763	4.465	-5.3792	0	29.427	1.50362
s-cd47-CD47-1	NCGC00346657-01	MK-5108	AURKA	-1.2	0.1865	85	-6.7292	s-cd47-WT_JUR-1	NCGC00346657-01	-1.2	0.2635	50.854	-6.5792	-0.15	34.146	1.79157
s-cd47-CD47-1	NCGC00263151-01	JNJ-7706621	AURKA	-1.2	5.2576	44.022	-5.2792	s-cd47-WT_JUR-1	NCGC00263151-01	-1.1	10.4904	4.83	-4.9792	-0.3	39.192	2.09948
s-cd47-CD47-1	NCGC00346648-01	GSK-1070916A	AURKB	-2.1	16.6261	0.52	-4.7792	s-cd47-WT_JUR-1	NCGC00346648-01	-2.1	13.2066	0.626	-4.8792	0.1	-0.106	-0.298496
s-cd47-CD47-1	NCGC00345881-02	Conivaptan hydrochloride	AVPR1A	4	33.1734	67.369	-4.4792	s-cd47-WT_JUR-1	NCGC00345881-02	4	0.1663	67.669	-6.7792	2.3	-0.3	-0.310334
s-cd47-CD47-1	NCGC00183001-01	Tolvaptan	AVPR2	4		87.447		s-cd47-WT_JUR-1	NCGC00183001-01	4	0.1865	89.493	-6.7292	6.7292	-2.046	-0.416876
s-cd47-CD47-1	NCGC00346719-01	LY-2811376	BACE1	1.4	0.003	101.458	-8.5292	s-cd47-WT_JUR-1	NCGC00346719-01	4	0.0935	112.602	-7.0292	-1.5	-11.144	-0.972039
s-cd47-CD47-1	NCGC00346506-01	LY-2886721	BACE1	-2.4	7.4266	38.208	-5.1292	s-cd47-WT_JUR-1	NCGC00346506-01	-2.1	14.818	19.045	-4.8292	-0.3	19.163	0.877305
s-cd47-CD47-1	NCGC00347939-01	BAM7	BCL2	-2.2	16.6261	87.57	-4.7792	s-cd47-WT_JUR-1	NCGC00347939-01	-2.4	18.6548	92.311	-4.7292	-0.05	-4.741	-0.581326
s-cd47-CD47-1	NCGC00015209-12	Cyclophosphamide	BCL2	-3	20.931	117.849	-4.6792	s-cd47-WT_JUR-1	NCGC00015209-12	-2.2	6.619	118.208	-5.1792	0.5	-0.359	-0.313935
s-cd47-CD47-1	NCGC00025207-06	HA-14-1	BCL2	-3	26.3506	2.207	-4.5792	s-cd47-WT_JUR-1	NCGC00025207-06	-2.1	26.3506	2.01	-4.5792	0	0.197	-0.280007
s-cd47-CD47-1	NCGC00345789-01	ABT-199	BCL2	-2.1	11.7704	13.048	-4.9292	s-cd47-WT_JUR-1	NCGC00345789-01	-1.1	6.619	2.921	-5.1792	0.25	10.127	0.325925
s-cd47-CD47-1	NCGC00016423-14	(-)-Gossypol	BCL2L1	-1.1	6.619	1.771	-5.1792	s-cd47-WT_JUR-1	NCGC00016423-14	-1.1	6.619	3.058	-5.1792	0	-1.287	-0.370562
s-cd47-CD47-1	NCGC00015225-03	Chelerythrine chloride	BCL2L1	-1.1	7.4266	1.037	-5.1292	s-cd47-WT_JUR-1	NCGC00015225-03	-1.1	5.2576	1.971	-5.2792	0.15	-0.934	-0.349021
s-cd47-CD47-1	NCGC00188344-05	Navitoclax	BCL2L1	-2.1	5.8992	0.827	-5.2292	s-cd47-WT_JUR-1	NCGC00188344-05	-1.1	0.2348	1.628	-6.6292	1.4	-0.801	-0.340906
s-cd47-CD47-1	NCGC00263166-01	Obatoclax	BCL2L1	-1.1	1.4818	2.689	-5.8292	s-cd47-WT_JUR-1	NCGC00263166-01	-1.1	0.3722	1.106	-6.4292	0.6	1.583	-0.195433
s-cd47-CD47-1	NCGC00263208-01	TW-37	BCL2L1	-2.2	14.818	34.779	-4.8292	s-cd47-WT_JUR-1	NCGC00263208-01	-1.1	10.4904	13.439	-4.9792	0.15	21.34	1.01015
s-cd47-CD47-1	NCGC00253562-02	ABT-737	BCL2L1	-2.1	14.818	29.852	-4.8292	s-cd47-WT_JUR-1	NCGC00253562-02	-1.1	1.8655	1.054	-5.7292	0.9	28.798	1.46524
s-cd47-CD47-1	NCGC00242514-01	Sepantronium bromide	BIRC5	-1.1	0.0833	1.144	-7.0792	s-cd47-WT_JUR-1	NCGC00242514-01	-1.1	0.0526	1.105	-7.2792	0.2	0.039	-0.289649
s-cd47-CD47-1	NCGC00189393-03	NCGC00189393-02	BLM	-2.2	14.818	52.55	-4.8292	s-cd47-WT_JUR-1	NCGC00189393-03	-3	11.7704	88.731	-4.9292	0.1	-36.181	-2.49981
s-cd47-CD47-1	NCGC00247866-04	NCGC00247866-02	BLM	4		122.71		s-cd47-WT_JUR-1	NCGC00247866-04	4	0.2635	122.767	-6.5792	6.5792	-0.057	-0.295506
s-cd47-CD47-1	NCGC00249389-01	LDN-193189	BMPR1A	-2.3	9.3495	0.205	-5.0292	s-cd47-WT_JUR-1	NCGC00249389-01	-1.3	6.619	0.89	-5.1792	0.15	-0.685	-0.333827
s-cd47-CD47-1	NCGC00025109-01	ZM-336372	BRAF	-1.1	0.4176	6.608	-6.3792	s-cd47-WT_JUR-1	NCGC00025109-01	-1.1	2.6351	26.629	-5.5792	-0.8	-20.021	-1.51372
s-cd47-CD47-1	NCGC00346458-01	MLN-2480	BRAF	-2.2	16.6261	77.352	-4.7792	s-cd47-WT_JUR-1	NCGC00346458-01	4	23.485	84.68	-4.6292	-0.15	-7.328	-0.739186
s-cd47-CD47-1	NCGC00346716-01	Dabrafenib	BRAF	-1.2	0.2348	49.986	-6.6292	s-cd47-WT_JUR-1	NCGC00346716-01	-1.2	0.2348	56.684	-6.6292	0	-6.698	-0.700743
s-cd47-CD47-1	NCGC00250380-01	AZ-628	BRAF	-2.2	20.931	32.427	-4.6792	s-cd47-WT_JUR-1	NCGC00250380-01	-2.2	18.6548	38.573	-4.7292	0.05	-6.146	-0.667059
s-cd47-CD47-1	NCGC00242249-02	SB-590885	BRAF	-2.1	20.931	-0.837	-4.6792	s-cd47-WT_JUR-1	NCGC00242249-02	-2.1	18.6548	-0.523	-4.7292	0.05	-0.314	-0.311189
s-cd47-CD47-1	NCGC00015478-08	GW-5074	BRAF	-3	26.3506	72.463	-4.5792	s-cd47-WT_JUR-1	NCGC00015478-08	-3	33.1734	71.612	-4.4792	-0.1	0.851	-0.2401
s-cd47-CD47-1	NCGC00249391-01	NVP-BHG712	BRAF	-2.1	11.7704	2.252	-4.9292	s-cd47-WT_JUR-1	NCGC00249391-01	-1.1	9.3495	0.648	-5.0292	0.1	1.604	-0.194152
s-cd47-CD47-1	NCGC00250399-01	Vemurafenib	BRAF	-2.1	18.6548	6.748	-4.7292	s-cd47-WT_JUR-1	NCGC00250399-01	-2.1	20.931	2.075	-4.6792	-0.05	4.673	-0.00688017
s-cd47-CD47-1	NCGC00250407-01	CHIR-265	BRAF	-2.1	5.2576	26.75	-5.2792	s-cd47-WT_JUR-1	NCGC00250407-01	-2.1	4.1763	19.87	-5.3792	0.1	6.88	0.127792
s-cd47-CD47-1	NCGC00187911-02	PLX-4720	BRAF	-2.2	8.3328	44.616	-5.0792	s-cd47-WT_JUR-1	NCGC00187911-02	-2.2	14.818	36.782	-4.8292	-0.25	7.834	0.186005
s-cd47-CD47-1	NCGC00346304-02	L-779450	BRAF	-2.2	23.485	39.961	-4.6292	s-cd47-WT_JUR-1	NCGC00346304-02	-2.1	20.931	25.008	-4.6792	0.05	14.953	0.620409
s-cd47-CD47-1	NCGC00346577-01	RAF-265 derivative	BRAF	-2.1	14.818	23.15	-4.8292	s-cd47-WT_JUR-1	NCGC00346577-01	-2.1	16.6261	6.199	-4.7792	-0.05	16.951	0.742328
s-cd47-CD47-1	NCGC00263179-01	AR-00341677	BRAF	4	0.4686	113.722	-6.3292	s-cd47-WT_JUR-1	NCGC00263179-01	1.4	0.001	96.729	-8.9792	2.65	16.993	0.744891
s-cd47-CD47-1	NCGC00250412-01	JQ1	BRD4	-2.1	4.6859	6.937	-5.3292	s-cd47-WT_JUR-1	NCGC00250412-01	-2.1	3.7221	2.182	-5.4292	0.1	4.755	-0.0018765
s-cd47-CD47-1	NCGC00344588-01	I-BET151	BRD4	-2.1	20.931	6.882	-4.6792	s-cd47-WT_JUR-1	NCGC00344588-01	-2.1	5.8992	0.957	-5.2292	0.55	5.925	0.0695173
s-cd47-CD47-1	NCGC00263621-02	I-BET762	BRD4	-2.2	6.619	41.586	-5.1792	s-cd47-WT_JUR-1	NCGC00263621-02	-2.1	10.4904	9.858	-4.9792	-0.2	31.728	1.64403
s-cd47-CD47-1	NCGC00025100-09	LFM-A13	BTK	4	14.818	84.88	-4.8292	s-cd47-WT_JUR-1	NCGC00025100-09	4	18.6548	94.726	-4.7292	-0.1	-9.846	-0.892835
s-cd47-CD47-1	NCGC00345857-01	CGI-1746	BTK	-2.2	18.6548	52.943	-4.7292	s-cd47-WT_JUR-1	NCGC00345857-01	-3	37.2212	55.745	-4.4292	-0.3	-2.802	-0.463007
s-cd47-CD47-1	NCGC00346962-01	HMSL10077	BTK	-1.1	4.6859	0.463	-5.3292	s-cd47-WT_JUR-1	NCGC00346962-01	-1.1	2.6351	1.245	-5.5792	0.25	-0.782	-0.339746
s-cd47-CD47-1	NCGC00187912-03	PCI-32765	BTK	-2.1	20.931	17.724	-4.6792	s-cd47-WT_JUR-1	NCGC00187912-03	-2.1	18.6548	1.828	-4.7292	0.05	15.896	0.677951
s-cd47-CD47-1	NCGC00016285-08	Sulfanilamide	CA1	4		122.396		s-cd47-WT_JUR-1	NCGC00016285-08	4	0.0021	117.899	-8.6792	8.6792	4.497	-0.0176198
s-cd47-CD47-1	NCGC00016371-05	Diclofenamide	CA1	4	0.0332	125.306	-7.4792	s-cd47-WT_JUR-1	NCGC00016371-05	4	0.0021	120.607	-8.6792	1.2	4.699	-0.00529364
s-cd47-CD47-1	NCGC00095003-06	Tioxolone	CA1	4	14.818	102.761	-4.8292	s-cd47-WT_JUR-1	NCGC00095003-06	-2.4	16.6261	95.483	-4.7792	-0.05	7.278	0.152078
s-cd47-CD47-1	NCGC00179244-04	Dorzolamide hydrochloride	CA2	4		98.184		s-cd47-WT_JUR-1	NCGC00179244-04	4		96.791		0	1.393	-0.207027
s-cd47-CD47-1	NCGC00018172-08	Indapamide	CA7	4	0.0372	112.312	-7.4292	s-cd47-WT_JUR-1	NCGC00018172-08	4	0.0469	119.673	-7.3292	-0.1	-7.361	-0.741199
s-cd47-CD47-1	NCGC00093985-10	Metolazone	CA7	4	5.2576	110.68	-5.2792	s-cd47-WT_JUR-1	NCGC00093985-10	4	0.1177	109.704	-6.9292	1.65	0.976	-0.232472
s-cd47-CD47-1	NCGC00159544-02	Zaldaride maleate	CALM1	-2.2	7.4266	68.993	-5.1292	s-cd47-WT_JUR-1	NCGC00159544-02	-1.2	2.6351	74.4	-5.5792	0.45	-5.407	-0.621965
s-cd47-CD47-1	NCGC00346967-01	HMSL10089	CAMKK1	-3	37.2212	35.449	-4.4292	s-cd47-WT_JUR-1	NCGC00346967-01	-3	37.2212	57.571	-4.4292	0	-22.122	-1.64192
s-cd47-CD47-1	NCGC00347910-01	CK59	CAMKK2	-3	37.2212	21.478	-4.4292	s-cd47-WT_JUR-1	NCGC00347910-01	-3	33.1734	42.753	-4.4792	0.05	-21.275	-1.59024
s-cd47-CD47-1	NCGC00163381-04	KN-62	CAMKK2	-1.2	3.3173	58.404	-5.4792	s-cd47-WT_JUR-1	NCGC00163381-04	-2.2	10.4904	70.902	-4.9792	-0.5	-12.498	-1.05466
s-cd47-CD47-1	NCGC00250376-01	KN-93	CAMKK2	-2.1	20.931	4.296	-4.6792	s-cd47-WT_JUR-1	NCGC00250376-01	-2.1	20.931	6.461	-4.6792	0	-2.165	-0.424137
s-cd47-CD47-1	NCGC00015233-04	Calmidazolium chloride	CAMKK2	-2.1	13.2066	-0.156	-4.8792	s-cd47-WT_JUR-1	NCGC00015233-04	-2.1	14.818	0.552	-4.8292	-0.05	-0.708	-0.335231
s-cd47-CD47-1	NCGC00167328-02	Aloxistatin	CAPN1	4	0.0042	132.797	-8.3792	s-cd47-WT_JUR-1	NCGC00167328-02	4	37.2212	104.466	-4.4292	-3.95	28.331	1.43674
s-cd47-CD47-1	NCGC00183434-03	NCGC00183434-01	CASP1	4		95.358		s-cd47-WT_JUR-1	NCGC00183434-03	4	0.5901	117.868	-6.2291	6.2291	-22.51	-1.6656
s-cd47-CD47-1	NCGC00183682-01	VX-765	CASP1	4	0.0469	102.787	-7.3292	s-cd47-WT_JUR-1	NCGC00183682-01	4	20.931	81.616	-4.6792	-2.65	21.171	0.999834
s-cd47-CD47-1	NCGC00346477-01	Emricasan	CASP1	-2.4	20.931	69.759	-4.6792	s-cd47-WT_JUR-1	NCGC00346477-01	-2.1	18.6548	26.974	-4.7292	0.05	42.785	2.31873
s-cd47-CD47-1	NCGC00163409-05	Betulinic acid	CASP3	4		89.062		s-cd47-WT_JUR-1	NCGC00163409-05	4		105.63		0	-16.568	-1.30301
s-cd47-CD47-1	NCGC00346583-01	Amygdalin	CASP3	-2.2	18.6548	39.588	-4.7292	s-cd47-WT_JUR-1	NCGC00346583-01	-2.2	16.6261	45.064	-4.7792	0.05	-5.476	-0.626176
s-cd47-CD47-1	NCGC00167805-02	Ivachtin	CASP3	4		101.471		s-cd47-WT_JUR-1	NCGC00167805-02	4	0.0015	101.864	-8.8292	8.8292	-0.393	-0.316009
s-cd47-CD47-1	NCGC00163510-03	Aloe-emodin	CASP3	-2.2	9.3495	65.223	-5.0292	s-cd47-WT_JUR-1	NCGC00163510-03	-2.2	14.818	64.567	-4.8292	-0.2	0.656	-0.251999
s-cd47-CD47-1	NCGC00167785-02	PAC-1	CASP3	-1.2	7.4266	41.834	-5.1292	s-cd47-WT_JUR-1	NCGC00167785-02	-1.1	4.1763	10.752	-5.3792	0.25	31.082	1.60461
s-cd47-CD47-1	NCGC00181002-02	Cinacalcet	CASR	4	7.4266	81.499	-5.1292	s-cd47-WT_JUR-1	NCGC00181002-02	4	5.8992	96.387	-5.2292	0.1	-14.888	-1.2005
s-cd47-CD47-1	NCGC00344507-02	Calhex 231	CASR	-2.4	13.2066	77.604	-4.8792	s-cd47-WT_JUR-1	NCGC00344507-02	4	23.485	89.988	-4.6292	-0.25	-12.384	-1.0477
s-cd47-CD47-1	NCGC00344508-01	NPS R568	CASR	4	0.0066	108.962	-8.1792	s-cd47-WT_JUR-1	NCGC00344508-01	4	0.0015	113.776	-8.8292	0.65	-4.814	-0.58578
s-cd47-CD47-1	NCGC00181349-01	Ranelic acid distrontium salt	CASR	4	0.0833	100.91	-7.0792	s-cd47-WT_JUR-1	NCGC00181349-01	4		103.876		-7.0792	-2.966	-0.473015
s-cd47-CD47-1	NCGC00344505-01	Calindol	CASR	4	37.2212	69.547	-4.4292	s-cd47-WT_JUR-1	NCGC00344505-01	-3	33.1734	68.237	-4.4792	0.05	1.31	-0.212092
s-cd47-CD47-1	NCGC00344509-01	AC-265347	CASR	4	0.2957	108.022	-6.5292	s-cd47-WT_JUR-1	NCGC00344509-01	-3	37.2212	76.539	-4.4292	-2.1	31.483	1.62908
s-cd47-CD47-1	NCGC00344510-02	SB262470 NPS-2143	CASR	4	1.049	97.874	-5.9792	s-cd47-WT_JUR-1	NCGC00344510-02	-2.1	26.3506	19.594	-4.5792	-1.4	78.28	4.48465
s-cd47-CD47-1	NCGC00346874-01	PD-134308	CCKB	4	0.0033	104.759	-8.4792	s-cd47-WT_JUR-1	NCGC00346874-01	4	9.3495	113.063	-5.0292	-3.45	-8.304	-0.798741
s-cd47-CD47-1	NCGC00263225-01	AG-041R	CCK-B	-2.2	20.931	52.368	-4.6792	s-cd47-WT_JUR-1	NCGC00263225-01	-2.1	23.485	9.739	-4.6292	-0.05	42.629	2.30921
s-cd47-CD47-1	NCGC00161599-11	Troglitazone	CCL2	4	14.818	77.104	-4.8292	s-cd47-WT_JUR-1	NCGC00161599-11	-2.2	18.6548	69.309	-4.7292	-0.1	7.795	0.183625
s-cd47-CD47-1	NCGC00182549-02	Vicriviroc	CCR5	-3	33.1734	23.981	-4.4792	s-cd47-WT_JUR-1	NCGC00182549-02	4		95.071		-4.4792	-71.09	-4.62997
s-cd47-CD47-1	NCGC00183109-02	Maraviroc	CCR5	4	37.2212	96.702	-4.4292	s-cd47-WT_JUR-1	NCGC00183109-02	4		100.887		-4.4292	-4.185	-0.547399
s-cd47-CD47-1	NCGC00163489-04	Shikonin	CCR5	-1.1	1.3207	1.016	-5.8792	s-cd47-WT_JUR-1	NCGC00163489-04	-1.1	1.049	2.763	-5.9792	0.1	-1.747	-0.398631
s-cd47-CD47-1	NCGC00345810-01	Tetrahydrouridine	CDA	4		121.346		s-cd47-WT_JUR-1	NCGC00345810-01	4	0.0372	121.999	-7.4292	7.4292	-0.653	-0.331875
s-cd47-CD47-1	NCGC00016258-07	Menadione	CDC25	-2.1	14.818	-0.719	-4.8292	s-cd47-WT_JUR-1	NCGC00016258-07	-2.1	14.818	0.851	-4.8292	0	-1.57	-0.38783
s-cd47-CD47-1	NCGC00092289-01	DA-3003-1	CDC25	-1.1	2.6351	-0.912	-5.5792	s-cd47-WT_JUR-1	NCGC00092289-01	-1.1	3.7221	-0.179	-5.4292	-0.15	-0.733	-0.336756
s-cd47-CD47-1	NCGC00347941-01	CASIN	CDC42	-2.1	23.485	0.021	-4.6292	s-cd47-WT_JUR-1	NCGC00347941-01	-2.1	16.6261	1.637	-4.7792	0.15	-1.616	-0.390637
s-cd47-CD47-1	NCGC00263209-02	ML 141	CDC42	-2.1	16.6261	12.475	-4.7792	s-cd47-WT_JUR-1	NCGC00263209-02	-2.1	18.6548	13.002	-4.7292	-0.05	-0.527	-0.324186
s-cd47-CD47-1	NCGC00346723-01	PHA-767491A	CDC7	-1.2	2.0931	50.652	-5.6792	s-cd47-WT_JUR-1	NCGC00346723-01	-1.1	5.2576	3.817	-5.2792	-0.4	46.835	2.56586
s-cd47-CD47-1	NCGC00179302-02	Indirubin	CDK1	-1.2	0.2957	76.79	-6.5292	s-cd47-WT_JUR-1	NCGC00179302-02	-1.4	2.9566	107.422	-5.5292	-1	-30.632	-2.1612
s-cd47-CD47-1	NCGC00094374-05	Seliciclib	CDK1	-2.2	23.485	22.064	-4.6292	s-cd47-WT_JUR-1	NCGC00094374-05	-2.2	20.931	35.592	-4.6792	0.05	-13.528	-1.11751
s-cd47-CD47-1	NCGC00346693-01	BMS-265246	CDK1	-1.2	3.7221	31.4	-5.4292	s-cd47-WT_JUR-1	NCGC00346693-01	-1.1	4.6859	39.938	-5.3292	-0.1	-8.538	-0.81302
s-cd47-CD47-1	NCGC00346950-01	NU-6102	CDK1	-2.1	16.6261	20.131	-4.7792	s-cd47-WT_JUR-1	NCGC00346950-01	-2.1	23.485	24.893	-4.6292	-0.15	-4.762	-0.582607
s-cd47-CD47-1	NCGC00346827-01	7-Hydroxystaurosporine	CDK1	-1.1	0.6619	0.797	-6.1792	s-cd47-WT_JUR-1	NCGC00346827-01	-1.1	0.4686	1.869	-6.3292	0.15	-1.072	-0.357442
s-cd47-CD47-1	NCGC00025220-03	Purvalanol B	CDK1	-2.4	52.5764	35.691	-4.2792	s-cd47-WT_JUR-1	NCGC00025220-03	-2.4	14.818	31.761	-4.8292	0.55	3.93	-0.0522183
s-cd47-CD47-1	NCGC00165844-02	NU-6027	CDK1	-2.2	13.2066	26.194	-4.8792	s-cd47-WT_JUR-1	NCGC00165844-02	-2.1	16.6261	19.135	-4.7792	-0.1	7.059	0.138714
s-cd47-CD47-1	NCGC00346940-01	CGP-60474	CDK1	-1.1	0.1177	12.54	-6.9292	s-cd47-WT_JUR-1	NCGC00346940-01	-1.1	0.1663	2.599	-6.7792	-0.15	9.941	0.314575
s-cd47-CD47-1	NCGC00025219-04	Purvalanol A	CDK1	-2.1	16.6261	15.32	-4.7792	s-cd47-WT_JUR-1	NCGC00025219-04	-2.1	20.931	1.815	-4.6792	-0.1	13.505	0.532052
s-cd47-CD47-1	NCGC00346617-01	AZD-5438	CDK1	-1.1	2.0931	18.763	-5.6792	s-cd47-WT_JUR-1	NCGC00346617-01	-1.1	3.7221	0.801	-5.4292	-0.25	17.962	0.804019
s-cd47-CD47-1	NCGC00263091-01	AT-7519	CDK1	-1.1	0.3317	27.655	-6.4792	s-cd47-WT_JUR-1	NCGC00263091-01	-1.1	0.6619	1.678	-6.1792	-0.3	25.977	1.2931
s-cd47-CD47-1	NCGC00346673-01	Milciclib	CDK1	-1.1	0.7427	34.643	-6.1292	s-cd47-WT_JUR-1	NCGC00346673-01	-1.1	1.8655	3.772	-5.7292	-0.4	30.871	1.59173
s-cd47-CD47-1	NCGC00263168-01	PHA-793887	CDK1	-1.2	0.935	33.85	-6.0292	s-cd47-WT_JUR-1	NCGC00263168-01	-1.1	2.3485	1.453	-5.6292	-0.4	32.397	1.68485
s-cd47-CD47-1	NCGC00346632-01	R-547	CDK1	-1.1	0.5258	36.61	-6.2792	s-cd47-WT_JUR-1	NCGC00346632-01	-1.1	2.3485	3.1	-5.6292	-0.65	33.51	1.75276
s-cd47-CD47-1	NCGC00250401-01	Flavopiridol???	CDK1	-1.1	0.059	37.554	-7.2292	s-cd47-WT_JUR-1	NCGC00250401-01	-1.1	0.0935	2.486	-7.0292	-0.2	35.068	1.84783
s-cd47-CD47-1	NCGC00345809-01	RGB-286147	CDK1	-1.1	0.059	39.37	-7.2292	s-cd47-WT_JUR-1	NCGC00345809-01	-1.1	0.1482	1.775	-6.8292	-0.4	37.595	2.00203
s-cd47-CD47-1	NCGC00345852-01	BS-194	CDK1	-1.1	0.2348	43.598	-6.6292	s-cd47-WT_JUR-1	NCGC00345852-01	-1.1	0.2635	1.928	-6.5792	-0.05	41.67	2.25069
s-cd47-CD47-1	NCGC00346656-01	Dinaciclib	CDK1	-1.2	0.0332	47.924	-7.4792	s-cd47-WT_JUR-1	NCGC00346656-01	-1.1	0.0372	3.92	-7.4292	-0.05	44.004	2.39311
s-cd47-CD47-1	NCGC00263191-01	PHA-690509	CDK2	-1.1	1.4818	17.268	-5.8292	s-cd47-WT_JUR-1	NCGC00263191-01	-1.1	3.3173	2.502	-5.4792	-0.35	14.766	0.608998
s-cd47-CD47-1	NCGC00263167-02	SNS-032	CDK2	-1.2	0.1663	34.22	-6.7792	s-cd47-WT_JUR-1	NCGC00263167-02	-1.1	0.2348	0.946	-6.6292	-0.15	33.274	1.73836
s-cd47-CD47-1	NCGC00346951-01	Fascaplysin	CDK4	-1.1	1.8655	0.455	-5.7292	s-cd47-WT_JUR-1	NCGC00346951-01	-1.1	1.3207	0.801	-5.8792	0.15	-0.346	-0.313141
s-cd47-CD47-1	NCGC00263129-01	PD-0332991	CDK4	-2.1	16.6261	1.831	-4.7792	s-cd47-WT_JUR-1	NCGC00263129-01	-2.1	14.818	0.52	-4.8292	0.05	1.311	-0.212031
s-cd47-CD47-1	NCGC00346952-01	Cdk4/6 Inhibitor IV	CDK4	-2.1	26.3506	4.473	-4.5792	s-cd47-WT_JUR-1	NCGC00346952-01	-2.1	23.485	2.62	-4.6292	0.05	1.853	-0.178958
s-cd47-CD47-1	NCGC00346553-01	BS-181	CDK7	-2.1	16.6261	1.171	-4.7792	s-cd47-WT_JUR-1	NCGC00346553-01	-2.1	18.6548	1.187	-4.7292	-0.05	-0.016	-0.293005
s-cd47-CD47-1	NCGC00346946-01	CDK9 inhibitor	CDK9	-2.2	20.931	40.897	-4.6792	s-cd47-WT_JUR-1	NCGC00346946-01	-2.2	26.3506	47.633	-4.5792	-0.1	-6.736	-0.703061
s-cd47-CD47-1	NCGC00346943-01	GSK-923295	CENPE	-2.1	4.6859	2.839	-5.3292	s-cd47-WT_JUR-1	NCGC00346943-01	-1.1	0.2635	4.95	-6.5792	1.25	-2.111	-0.420842
s-cd47-CD47-1	NCGC00188865-02	Pazopanib	CERS1	-2.1	20.931	25.674	-4.6792	s-cd47-WT_JUR-1	NCGC00188865-02	-2.2	29.5659	34.291	-4.5292	-0.15	-8.617	-0.817841
s-cd47-CD47-1	NCGC00263224-01	D-NMAPPD	CERS1	-2.1	18.6548	1.676	-4.7292	s-cd47-WT_JUR-1	NCGC00263224-01	-2.1	18.6548	0.669	-4.7292	0	1.007	-0.230581
s-cd47-CD47-1	NCGC00263217-01	NVP231	CERS1	-1.1	4.1763	13.445	-5.3792	s-cd47-WT_JUR-1	NCGC00263217-01	-1.1	2.6351	6.085	-5.5792	0.2	7.36	0.157082
s-cd47-CD47-1	NCGC00346671-01	Anacetrapib	CETP	-2.4	11.7704	80.421	-4.9292	s-cd47-WT_JUR-1	NCGC00346671-01	-2.2	18.6548	79.776	-4.7292	-0.2	0.645	-0.25267
s-cd47-CD47-1	NCGC00263083-01	Dalcetrapib	CETP	4	23.485	85.355	-4.6292	s-cd47-WT_JUR-1	NCGC00263083-01	-1.4	0.2957	82.802	-6.5292	1.9	2.553	-0.136243
s-cd47-CD47-1	NCGC00346703-01	Torcetrapib	CETP	-2.1	13.2066	42.694	-4.8792	s-cd47-WT_JUR-1	NCGC00346703-01	-1.1	10.4904	32.033	-4.9792	0.1	10.661	0.35851
s-cd47-CD47-1	NCGC00242480-01	Ivacaftor	CFTR	4	8.3328	114.757	-5.0792	s-cd47-WT_JUR-1	NCGC00242480-01	4	0.0037	115.273	-8.4292	3.35	-0.516	-0.323515
s-cd47-CD47-1	NCGC00346550-01	Lumacaftor	CFTR	-1.1	0.0833	34.976	-7.0792	s-cd47-WT_JUR-1	NCGC00346550-01	-1.1	0.0743	4.41	-7.1292	0.05	30.566	1.57312
s-cd47-CD47-1	NCGC00168759-04	PTC-124	CFTR	4		109.291		s-cd47-WT_JUR-1	NCGC00168759-04	-2.4	16.6261	77.858	-4.7792	4.7792	31.433	1.62602
s-cd47-CD47-1	NCGC00346626-01	CHIR-124	CHEK1	-2.1	1.4818	0.474	-5.8292	s-cd47-WT_JUR-1	NCGC00346626-01	-1.1	0.1177	1.158	-6.9292	1.1	-0.684	-0.333766
s-cd47-CD47-1	NCGC00346954-01	TCS-2312	CHEK1	-1.1	2.6351	7.707	-5.5792	s-cd47-WT_JUR-1	NCGC00346954-01	-1.1	0.935	2.936	-6.0292	0.45	4.771	-0.000900178
s-cd47-CD47-1	NCGC00346653-01	SCH-900776	CHEK1	-1.2	1.4818	19.896	-5.8292	s-cd47-WT_JUR-1	NCGC00346653-01	-1.1	0.3722	12.824	-6.4292	0.6	7.072	0.139508
s-cd47-CD47-1	NCGC00263132-02	PF-477736	CHEK1	-1.1	0.3317	14.494	-6.4792	s-cd47-WT_JUR-1	NCGC00263132-02	-1.1	0.5258	2.213	-6.2792	-0.2	12.281	0.457363
s-cd47-CD47-1	NCGC00343768-01	Rabusertib	CHEK1	-1.1	4.1763	21.324	-5.3792	s-cd47-WT_JUR-1	NCGC00343768-01	-1.1	2.6351	2.668	-5.5792	0.2	18.656	0.846368
s-cd47-CD47-1	NCGC00242481-02	AZD-7762	CHEK1	-1.4	0.5899	39.585	-6.2292	s-cd47-WT_JUR-1	NCGC00242481-02	-1.1	0.2957	9.778	-6.5292	0.3	29.807	1.52681
s-cd47-CD47-1	NCGC00346436-01	CCT-241533	CHEK2	-2.1	23.485	2.722	-4.6292	s-cd47-WT_JUR-1	NCGC00346436-01	-2.1	23.485	4.008	-4.6292	0	-1.286	-0.370501
s-cd47-CD47-1	NCGC00165768-02	339253	CHEK2	-2.2	11.7704	30.577	-4.9292	s-cd47-WT_JUR-1	NCGC00165768-02	-2.2	6.619	24.337	-5.1792	0.25	6.24	0.0887387
s-cd47-CD47-1	NCGC00160397-01	Irsogladine maleate	CHRM1	4	16.6261	82.437	-4.7792	s-cd47-WT_JUR-1	NCGC00160397-01	4		109.189		-4.7792	-26.752	-1.92445
s-cd47-CD47-1	NCGC00015026-14	Atropine	CHRM1	4	0.0743	83.382	-7.1292	s-cd47-WT_JUR-1	NCGC00015026-14	4		100.429		-7.1292	-17.047	-1.33224
s-cd47-CD47-1	NCGC00186628-01	Butylscopolamine bromide	CHRM1	4		123.547		s-cd47-WT_JUR-1	NCGC00186628-01	4	4.6859	112.561	-5.3292	5.3292	10.986	0.378341
s-cd47-CD47-1	NCGC00016463-02	Cytisine	CHRNA3	4	16.6261	97.837	-4.7792	s-cd47-WT_JUR-1	NCGC00016463-02	4	23.485	107.628	-4.6292	-0.15	-9.791	-0.889479
s-cd47-CD47-1	NCGC00162225-05	L-tetramisol	CHRNA3	4	0.3722	115.086	-6.4292	s-cd47-WT_JUR-1	NCGC00162225-05	4	0.3317	114.957	-6.4792	0.05	0.129	-0.284157
s-cd47-CD47-1	NCGC00247735-02	Varenicline tartrate	CHRNA3	4		119.985		s-cd47-WT_JUR-1	NCGC00247735-02	4	5.8992	116.127	-5.2292	5.2292	3.858	-0.0566118
s-cd47-CD47-1	NCGC00092364-05	PNU-282987	CHRNA7	4	33.1734	92.901	-4.4792	s-cd47-WT_JUR-1	NCGC00092364-05	4		104.712		-4.4792	-11.811	-1.01274
s-cd47-CD47-1	NCGC00167746-01	PNU-120596	CHRNA7	-1.2	7.4266	77.413	-5.1292	s-cd47-WT_JUR-1	NCGC00167746-01	4	8.3328	88.991	-5.0792	-0.05	-11.578	-0.998522
s-cd47-CD47-1	NCGC00183105-01	Lubiprostone	CLCN2	4		103.174		s-cd47-WT_JUR-1	NCGC00183105-01	4		108.225		0	-5.051	-0.600242
s-cd47-CD47-1	NCGC00345739-02	KH-CB19	CLK1	1.4	0.001	88.993	-8.9792	s-cd47-WT_JUR-1	NCGC00345739-02	4	33.1734	85.044	-4.4792	-4.5	3.949	-0.0510589
s-cd47-CD47-1	NCGC00241342-02	KUC107550N	CLK1	-2.2	13.2066	29.322	-4.8792	s-cd47-WT_JUR-1	NCGC00241342-02	-2.1	9.3495	18.468	-5.0292	0.15	10.854	0.370287
s-cd47-CD47-1	NCGC00092385-02	LY-320135	CNR1	-2.2	18.6548	68.621	-4.7292	s-cd47-WT_JUR-1	NCGC00092385-02	-3	33.1734	71.205	-4.4792	-0.25	-2.584	-0.449705
s-cd47-CD47-1	NCGC00016210-06	WIN-55212-2	CNR1	-2.1	20.931	8.149	-4.6792	s-cd47-WT_JUR-1	NCGC00016210-06	-2.1	23.485	2.394	-4.6292	-0.05	5.755	0.0591439
s-cd47-CD47-1	NCGC00164572-01	Rimonabant	CNR1	-2.1	16.6261	12.325	-4.7792	s-cd47-WT_JUR-1	NCGC00164572-01	-2.1	18.6548	5.356	-4.7292	-0.05	6.969	0.133223
s-cd47-CD47-1	NCGC00346697-01	842166X	CNR2	-3	33.1734	37.514	-4.4792	s-cd47-WT_JUR-1	NCGC00346697-01	-3	33.1734	63.654	-4.4792	0	-26.14	-1.8871
s-cd47-CD47-1	NCGC00025012-02	AM-630	CNR2	-2.4	16.6261	36.125	-4.7792	s-cd47-WT_JUR-1	NCGC00025012-02	-2.1	18.6548	12.87	-4.7292	-0.05	23.255	1.127
s-cd47-CD47-1	NCGC00181767-01	Tolcapone	COMT	-3	37.2212	72.927	-4.4292	s-cd47-WT_JUR-1	NCGC00181767-01	-3	37.2212	36.753	-4.4292	0	36.174	1.91532
s-cd47-CD47-1	NCGC00250406-01	Tipifarnib	COX10	-2.1	5.8992	3.808	-5.2292	s-cd47-WT_JUR-1	NCGC00250406-01	-2.1	5.8992	0.015	-5.2292	0	3.793	-0.0605781
s-cd47-CD47-1	NCGC00346707-01	Lonafarnib	COX10	-2.1	16.6261	6.165	-4.7792	s-cd47-WT_JUR-1	NCGC00346707-01	-2.1	16.6261	-0.402	-4.7792	0	6.567	0.108692
s-cd47-CD47-1	NCGC00242503-01	Meclinertant	CPA1	-2.1	23.485	15.594	-4.6292	s-cd47-WT_JUR-1	NCGC00242503-01	-3	33.1734	23.604	-4.4792	-0.15	-8.01	-0.780801
s-cd47-CD47-1	NCGC00345853-01	JNJ-28312141	CSF1R	4		91.578		s-cd47-WT_JUR-1	NCGC00345853-01	4		93.731		0	-2.153	-0.423405
s-cd47-CD47-1	NCGC00348107-01	c-FMS inhibitor	CSF1R	-2.1	23.485	12.127	-4.6292	s-cd47-WT_JUR-1	NCGC00348107-01	-3	37.2212	13.641	-4.4292	-0.2	-1.514	-0.384413
s-cd47-CD47-1	NCGC00346963-01	HMSL10083	CSF1R	-2.2	13.2066	55.05	-4.8792	s-cd47-WT_JUR-1	NCGC00346963-01	-2.2	18.6548	36.712	-4.7292	-0.15	18.338	0.826963
s-cd47-CD47-1	NCGC00263193-01	KI-20227	CSF1R	-2.4	37.2212	42.569	-4.4292	s-cd47-WT_JUR-1	NCGC00263193-01	-2.1	23.485	12.143	-4.6292	0.2	30.426	1.56458
s-cd47-CD47-1	NCGC00242498-03	D-4476	CSNK1A1	-3	20.931	97.862	-4.6792	s-cd47-WT_JUR-1	NCGC00242498-03	-2.2	14.818	87.392	-4.8292	0.15	10.47	0.346855
s-cd47-CD47-1	NCGC00015420-09	Emodin	CSNK1A2	-3	26.3506	66.16	-4.5792	s-cd47-WT_JUR-1	NCGC00015420-09	-2.2	20.931	66.845	-4.6792	0.1	-0.685	-0.333827
s-cd47-CD47-1	NCGC00263192-02	Silmitasertib	CSNK1A2	-2.1	8.3328	11.506	-5.0792	s-cd47-WT_JUR-1	NCGC00263192-02	-1.1	5.8992	5.359	-5.2292	0.15	6.147	0.0830638
s-cd47-CD47-1	NCGC00163431-03	CA-074 Me	CTSB	-2.1	14.818	8.068	-4.8292	s-cd47-WT_JUR-1	NCGC00163431-03	-2.1	9.3495	2.608	-5.0292	0.2	5.46	0.0411429
s-cd47-CD47-1	NCGC00346637-01	Odanacatib	CTSK	-2.4	5.8992	90.449	-5.2292	s-cd47-WT_JUR-1	NCGC00346637-01	-2.4	11.7704	88.288	-4.9292	-0.3	2.161	-0.160163
s-cd47-CD47-1	NCGC00345807-01	CAA0225	CTSL1	-2.2	14.818	41.833	-4.8292	s-cd47-WT_JUR-1	NCGC00345807-01	-1.1	9.3495	13.449	-5.0292	0.2	28.384	1.43997
s-cd47-CD47-1	NCGC00263128-01	PD-0220245	CXCR1	-1.1	9.3495	2.639	-5.0292	s-cd47-WT_JUR-1	NCGC00263128-01	-1.1	8.3328	4.675	-5.0792	0.05	-2.036	-0.416266
s-cd47-CD47-1	NCGC00242491-02	SB-265610	CXCR2	1.3	0.0118	78.867	-7.9292	s-cd47-WT_JUR-1	NCGC00242491-02	-2.4	37.2212	81.636	-4.4292	-3.5	-2.769	-0.460994
s-cd47-CD47-1	NCGC00165722-02	Plerixafor hydrochloride	CXCR4	4	0.0105	106.345	-7.9792	s-cd47-WT_JUR-1	NCGC00165722-02	4		111.336		-7.9792	-4.991	-0.596581
s-cd47-CD47-1	NCGC00025000-08	Ketoconazole	CYP19A1	-2.2	18.6548	33.686	-4.7292	s-cd47-WT_JUR-1	NCGC00025000-08	-2.2	18.6548	50.728	-4.7292	0	-17.042	-1.33194
s-cd47-CD47-1	NCGC00164619-04	Anastrozole	CYP19A1	4	0.0209	111.766	-7.6792	s-cd47-WT_JUR-1	NCGC00164619-04	4		115.914		-7.6792	-4.148	-0.545141
s-cd47-CD47-1	NCGC00015110-12	Aminoglutethimide	CYP19A1	4	0.5899	105.444	-6.2292	s-cd47-WT_JUR-1	NCGC00015110-12	4		107.852		-6.2292	-2.408	-0.438965
s-cd47-CD47-1	NCGC00164380-02	Formestane	CYP19A1	4	0.0033	102.863	-8.4792	s-cd47-WT_JUR-1	NCGC00164380-02	4		103.75		-8.4792	-0.887	-0.346153
s-cd47-CD47-1	NCGC00016973-03	Letrozole	CYP19A1	-2.2	14.818	70.731	-4.8292	s-cd47-WT_JUR-1	NCGC00016973-03	-2.4	18.6548	68.405	-4.7292	-0.1	2.326	-0.150095
s-cd47-CD47-1	NCGC00018294-06	Miconazole nitrate	CYP19A1	-2.1	18.6548	8.864	-4.7292	s-cd47-WT_JUR-1	NCGC00018294-06	-2.1	20.931	4.956	-4.6792	-0.05	3.908	-0.0535607
s-cd47-CD47-1	NCGC00091009-05	Methyltestosterone	CYP19A1	-2.2	48.0869	45.934	-4.318	s-cd47-WT_JUR-1	NCGC00091009-05	-2.1	38.1968	19.391	-4.418	0.1	26.543	1.32764
s-cd47-CD47-1	NCGC00271596-04	Exemestane	CYP19A1	-3	37.2212	77.388	-4.4292	s-cd47-WT_JUR-1	NCGC00271596-04	-3	29.5659	48.822	-4.5292	0.1	28.566	1.45108
s-cd47-CD47-1	NCGC00016418-14	Methoxsalen	CYP1A2	4		110.632		s-cd47-WT_JUR-1	NCGC00016418-14	4		105.946		0	4.686	-0.00608691
s-cd47-CD47-1	NCGC00015672-01	Morin hydrate	CYP1A2	4	0.8333	104.984	-6.0792	s-cd47-WT_JUR-1	NCGC00015672-01	4		96.983		-6.0792	8.001	0.196196
s-cd47-CD47-1	NCGC00015697-11	Myricetin	CYP1A2	-3	37.2212	65.317	-4.4292	s-cd47-WT_JUR-1	NCGC00015697-11	-2.2	20.931	53.574	-4.6792	0.25	11.743	0.424534
s-cd47-CD47-1	NCGC00015049-18	Apigenin	CYP2C9	-2.2	10.4904	44.401	-4.9792	s-cd47-WT_JUR-1	NCGC00015049-18	-2.4	14.818	40.451	-4.8292	-0.15	3.95	-0.0509979
s-cd47-CD47-1	NCGC00346572-01	Avasimibe	CYP2C9	-2.2	16.6261	25.827	-4.7792	s-cd47-WT_JUR-1	NCGC00346572-01	-2.1	18.6548	5.103	-4.7292	-0.05	20.724	0.972558
s-cd47-CD47-1	NCGC00017236-08	Baicalein	CYP2C9	-2.4	14.818	91.667	-4.8292	s-cd47-WT_JUR-1	NCGC00017236-08	-3	26.3506	63.506	-4.5792	-0.25	28.161	1.42637
s-cd47-CD47-1	NCGC00015871-07	Quinidine	CYP2D6	-1.4	6.619	90.421	-5.1792	s-cd47-WT_JUR-1	NCGC00015871-07	-2.2	8.3328	75.038	-5.0792	-0.1	15.383	0.646648
s-cd47-CD47-1	NCGC00016457-03	Naringenin	CYP3A4	4		119.242		s-cd47-WT_JUR-1	NCGC00016457-03	4		118.303		0	0.939	-0.23473
s-cd47-CD47-1	NCGC00185736-01	Posaconazole	CYP51A1	-2.2	20.931	28.741	-4.6792	s-cd47-WT_JUR-1	NCGC00185736-01	-2.2	23.485	28.132	-4.6292	-0.05	0.609	-0.254867
s-cd47-CD47-1	NCGC00015251-14	Clotrimazole	CYP51A1	-2.2	14.818	45.535	-4.8292	s-cd47-WT_JUR-1	NCGC00015251-14	-2.2	13.2066	41.496	-4.8792	0.05	4.039	-0.0455671
s-cd47-CD47-1	NCGC00164622-04	Voriconazole	CYP51A1	4	2.9566	109.53	-5.5292	s-cd47-WT_JUR-1	NCGC00164622-04	4	0.0132	99.761	-7.8792	2.35	9.769	0.30408
s-cd47-CD47-1	NCGC00015870-16	Quercetine	CYP75A12	-3	29.5659	26.585	-4.5292	s-cd47-WT_JUR-1	NCGC00015870-16	-2.1	26.3506	6.499	-4.5792	0.05	20.086	0.933627
s-cd47-CD47-1	NCGC00181765-01	Pranlukast hydrate	CYSLTR1	-2.2	16.6261	48.291	-4.7792	s-cd47-WT_JUR-1	NCGC00181765-01	4	16.6261	71.515	-4.7792	0	-23.224	-1.70917
s-cd47-CD47-1	NCGC00164547-06	Zafirlukast	CYSLTR1	-2.1	16.6261	0.763	-4.7792	s-cd47-WT_JUR-1	NCGC00164547-06	-2.1	18.6548	2.379	-4.7292	-0.05	-1.616	-0.390637
s-cd47-CD47-1	NCGC00015163-08	Benserazide	DDC	-2.1	14.818	2.259	-4.8292	s-cd47-WT_JUR-1	NCGC00015163-08	-2.1	23.485	2.778	-4.6292	-0.2	-0.519	-0.323698
s-cd47-CD47-1	NCGC00024667-13	Methyldopa	DDC	-1.2	6.619	66.092	-5.1792	s-cd47-WT_JUR-1	NCGC00024667-13	-1.1	9.3495	2.736	-5.0292	-0.15	63.356	3.57398
s-cd47-CD47-1	NCGC00347217-01	PRP003-013	DDR1	-2.1	11.7704	2.646	-4.9292	s-cd47-WT_JUR-1	NCGC00347217-01	-1.1	8.3328	2.532	-5.0792	0.15	0.114	-0.285072
s-cd47-CD47-1	NCGC00346961-01	HMSL10076	DDR1	-2.1	16.6261	3.867	-4.7792	s-cd47-WT_JUR-1	NCGC00346961-01	-2.1	18.6548	1.806	-4.7292	-0.05	2.061	-0.166265
s-cd47-CD47-1	NCGC00346522-01	A-922500	DGAT1	4	33.1734	87.764	-4.4792	s-cd47-WT_JUR-1	NCGC00346522-01	-3	26.3506	72.932	-4.5792	0.1	14.832	0.613026
s-cd47-CD47-1	NCGC00242596-01	Pralatrexate	DHFR	-1.1	0.0372	8.967	-7.4292	s-cd47-WT_JUR-1	NCGC00242596-01	-1.1	0.0469	18.713	-7.3292	-0.1	-9.746	-0.886733
s-cd47-CD47-1	NCGC00016256-16	Pyrimethamine	DHFR	-1.1	2.0931	8.807	-5.6792	s-cd47-WT_JUR-1	NCGC00016256-16	-1.1	1.6626	16.367	-5.7792	0.1	-7.56	-0.753342
s-cd47-CD47-1	NCGC00015038-08	Aminopterin	DHFR	-1.1	0.0332	16.153	-7.4792	s-cd47-WT_JUR-1	NCGC00015038-08	-1.1	0.0418	20.95	-7.3792	-0.1	-4.797	-0.584743
s-cd47-CD47-1	NCGC00161419-03	Trimetrexate	DHFR	-1.1	0.935	0.503	-6.0292	s-cd47-WT_JUR-1	NCGC00161419-03	-1.1	1.049	4.613	-5.9792	-0.05	-4.11	-0.542822
s-cd47-CD47-1	NCGC00025060-16	Methotrexate	DHFR	-1.3	0.0332	54.169	-7.4792	s-cd47-WT_JUR-1	NCGC00025060-16	-1.1	0.0469	9.002	-7.3292	-0.15	45.167	2.46408
s-cd47-CD47-1	NCGC00345056-01	Vidofludimus	DHODH	-1.2	1.6626	64.725	-5.7792	s-cd47-WT_JUR-1	NCGC00345056-01	-2.3	10.4904	19.287	-4.9792	-0.8	45.438	2.48061
s-cd47-CD47-1	NCGC00014891-03	RG-108	DNMT1	4		94.15		s-cd47-WT_JUR-1	NCGC00014891-03	4	0.0043	113.514	-8.368	8.368	-19.364	-1.47363
s-cd47-CD47-1	NCGC00166088-05	Decitabine	DNMT1	-1.2	0.3722	72.263	-6.4292	s-cd47-WT_JUR-1	NCGC00166088-05	-1.2	0.2348	70.809	-6.6292	0.2	1.454	-0.203305
s-cd47-CD47-1	NCGC00090851-09	5-Azacitidine	DNMT1	-1.1	1.8655	20.191	-5.7292	s-cd47-WT_JUR-1	NCGC00090851-09	-1.1	2.6351	3.895	-5.5792	-0.15	16.296	0.702359
s-cd47-CD47-1	NCGC00346830-01	NSC-48006	DNMT1	-1.2	0.0332	46.143	-7.4792	s-cd47-WT_JUR-1	NCGC00346830-01	-1.1	0.1177	20.924	-6.9292	-0.55	25.219	1.24684
s-cd47-CD47-1	NCGC00178734-03	Sitagliptin	DPP4	1.4	0.001	104.007	-8.9792	s-cd47-WT_JUR-1	NCGC00178734-03	4	4.6859	119.869	-5.3292	-3.65	-15.862	-1.25993
s-cd47-CD47-1	NCGC00346655-01	Linagliptin	DPP4	4		111.667		s-cd47-WT_JUR-1	NCGC00346655-01	4	8.3328	104.162	-5.0792	5.0792	7.505	0.165929
s-cd47-CD47-1	NCGC00242597-01	Saxagliptin	DPP4	4	1.8655	127.889	-5.7292	s-cd47-WT_JUR-1	NCGC00242597-01	4	0.4176	110.24	-6.3792	0.65	17.649	0.78492
s-cd47-CD47-1	NCGC00181011-01	Gimeracil	DPYD	4		106.453		s-cd47-WT_JUR-1	NCGC00181011-01	4	18.6548	83.034	-4.7292	4.7292	23.419	1.13701
s-cd47-CD47-1	NCGC00015036-08	Amantadine hydrochloride	DRD1	-3	37.2212	42.901	-4.4292	s-cd47-WT_JUR-1	NCGC00015036-08	-2.2	23.485	53.566	-4.6292	0.2	-10.665	-0.94281
s-cd47-CD47-1	NCGC00014670-16	Domperidone	DRD1	4		94.068		s-cd47-WT_JUR-1	NCGC00014670-16	4	33.1734	85.633	-4.4792	4.4792	8.435	0.222678
s-cd47-CD47-1	NCGC00188689-01	Asenapine maleate	DRD1	-3	26.3506	63.929	-4.5792	s-cd47-WT_JUR-1	NCGC00188689-01	-3	29.5659	54.456	-4.5292	-0.05	9.473	0.286018
s-cd47-CD47-1	NCGC00015444-04	Fenoldopam	DRD1	4		93.129		s-cd47-WT_JUR-1	NCGC00015444-04	-3	37.2212	61.271	-4.4292	4.4292	31.858	1.65196
s-cd47-CD47-1	NCGC00013226-15	Stelazine trifluoperzine	DRD2	-2.1	20.931	26.851	-4.6792	s-cd47-WT_JUR-1	NCGC00013226-15	-3	37.2212	67.174	-4.4292	-0.25	-40.323	-2.75255
s-cd47-CD47-1	NCGC00015883-08	Risperidone???	DRD2	4		92.494		s-cd47-WT_JUR-1	NCGC00015883-08	4	13.2066	109.514	-4.8792	4.8792	-17.02	-1.33059
s-cd47-CD47-1	NCGC00096077-05	Olanzapine	DRD2	4	0.0187	103.2	-7.7292	s-cd47-WT_JUR-1	NCGC00096077-05	4	5.2576	111.758	-5.2792	-2.45	-8.558	-0.814241
s-cd47-CD47-1	NCGC00188864-01	Iloperidone	DRD2	-2.2	18.6548	51.526	-4.7292	s-cd47-WT_JUR-1	NCGC00188864-01	-3	23.485	59.015	-4.6292	-0.1	-7.489	-0.74901
s-cd47-CD47-1	NCGC00015856-08	Prochlorperazine	DRD2	-2.1	23.485	9.788	-4.6292	s-cd47-WT_JUR-1	NCGC00015856-08	-3	26.3506	16.175	-4.5792	-0.05	-6.387	-0.681765
s-cd47-CD47-1	NCGC00015500-10	Haloperidol	DRD2	-2.2	18.6548	74.278	-4.7292	s-cd47-WT_JUR-1	NCGC00015500-10	-3	23.485	78.943	-4.6292	-0.1	-4.665	-0.576688
s-cd47-CD47-1	NCGC00016083-13	Verapamil	DRD2	4	42.8575	84.942	-4.368	s-cd47-WT_JUR-1	NCGC00016083-13	-1.4	0.027	88.77	-7.568	3.2	-3.828	-0.525614
s-cd47-CD47-1	NCGC00015436-09	Fluphenazine hydrochloride	DRD2	-2.1	23.485	3.978	-4.6292	s-cd47-WT_JUR-1	NCGC00015436-09	-3	26.3506	4.723	-4.5792	-0.05	-0.745	-0.337488
s-cd47-CD47-1	NCGC00346440-01	Sumanirole maleate	DRD2	4	1.3207	96.548	-5.8792	s-cd47-WT_JUR-1	NCGC00346440-01	4	0.8333	95.064	-6.0792	0.2	1.484	-0.201474
s-cd47-CD47-1	NCGC00092310-03	Amisulpride	DRD2	4	0.1321	105.031	-6.8792	s-cd47-WT_JUR-1	NCGC00092310-03	4		103.06		-6.8792	1.971	-0.171757
s-cd47-CD47-1	NCGC00015966-03	Levosulpiride	DRD2	4		122.867		s-cd47-WT_JUR-1	NCGC00015966-03	4		115.739		0	7.128	0.142925
s-cd47-CD47-1	NCGC00025072-01	PD-128907	DRD2	-3	37.2212	50.74	-4.4292	s-cd47-WT_JUR-1	NCGC00025072-01	-3	37.2212	37.037	-4.4292	0	13.703	0.544134
s-cd47-CD47-1	NCGC00167441-03	Pramipexole hydrochloride	DRD3	4	0.0021	112.115	-8.6792	s-cd47-WT_JUR-1	NCGC00167441-03	4		112.845		-8.6792	-0.73	-0.336573
s-cd47-CD47-1	NCGC00015254-12	Clozapine	DRD4	4	37.2212	93.787	-4.4292	s-cd47-WT_JUR-1	NCGC00015254-12	4	0.0148	93.174	-7.8292	3.4	0.613	-0.254623
s-cd47-CD47-1	NCGC00347945-01	ID-8	DYRK1A	4		114.649		s-cd47-WT_JUR-1	NCGC00347945-01	4	2.3485	117.56	-5.6292	5.6292	-2.911	-0.469659
s-cd47-CD47-1	NCGC00242479-01	Zibotentan	EDNRA	4		97.669		s-cd47-WT_JUR-1	NCGC00242479-01	4		98.1		0	-0.431	-0.318328
s-cd47-CD47-1	NCGC00346456-01	Macitentan	EDNRA	4	0.3317	126.423	-6.4792	s-cd47-WT_JUR-1	NCGC00346456-01	4		124.175		-6.4792	2.248	-0.154855
s-cd47-CD47-1	NCGC00346730-01	Ambrisentan	EDNRA	1.4	0.001	112.558	-8.9792	s-cd47-WT_JUR-1	NCGC00346730-01	-1.4	0.001	98.985	-8.9792	0	13.573	0.536201
s-cd47-CD47-1	NCGC00346839-01	4-Quinazolinamine	EGFR	4	37.2212	75.921	-4.4292	s-cd47-WT_JUR-1	NCGC00346839-01	4	20.931	90.583	-4.6792	0.25	-14.662	-1.18671
s-cd47-CD47-1	NCGC00263144-02	WZ-4002	EGFR	-2.2	14.818	-0.545	-4.8292	s-cd47-WT_JUR-1	NCGC00263144-02	-2.1	5.2576	1.229	-5.2792	0.45	-1.774	-0.400278
s-cd47-CD47-1	NCGC00167507-03	Lapatinib	EGFR	-1.1	0.8333	0.625	-6.0792	s-cd47-WT_JUR-1	NCGC00167507-03	-1.1	1.049	1.775	-5.9792	-0.1	-1.15	-0.362202
s-cd47-CD47-1	NCGC00185000-03	Afatinib	EGFR	-2.1	8.3328	2.357	-5.0792	s-cd47-WT_JUR-1	NCGC00185000-03	-1.1	4.6859	3.468	-5.3292	0.25	-1.111	-0.359822
s-cd47-CD47-1	NCGC00167513-03	Vandetanib	EGFR	-2.1	26.3506	-0.138	-4.5792	s-cd47-WT_JUR-1	NCGC00167513-03	-2.1	20.931	0.94	-4.6792	0.1	-1.078	-0.357808
s-cd47-CD47-1	NCGC00263185-01	Dacomitinib	EGFR	-2.1	16.6261	-0.219	-4.7792	s-cd47-WT_JUR-1	NCGC00263185-01	-2.1	13.2066	0.849	-4.8792	0.1	-1.068	-0.357198
s-cd47-CD47-1	NCGC00159455-04	Gefitinib	EGFR	-2.1	27.0412	1.52	-4.568	s-cd47-WT_JUR-1	NCGC00159455-04	-2.1	34.0429	2.495	-4.468	-0.1	-0.975	-0.351523
s-cd47-CD47-1	NCGC00182713-01	Canertinib	EGFR	-2.1	16.6261	0.296	-4.7792	s-cd47-WT_JUR-1	NCGC00182713-01	-2.1	14.818	0.978	-4.8292	0.05	-0.682	-0.333644
s-cd47-CD47-1	NCGC00263149-01	AEE-788	EGFR	-2.4	20.931	2.172	-4.6792	s-cd47-WT_JUR-1	NCGC00263149-01	-2.4	1.8655	2.85	-5.7292	1.05	-0.678	-0.3334
s-cd47-CD47-1	NCGC00346497-01	WZ-8040	EGFR	-2.3	11.7704	1.152	-4.9292	s-cd47-WT_JUR-1	NCGC00346497-01	-2.3	5.2576	1.824	-5.2792	0.35	-0.672	-0.333034
s-cd47-CD47-1	NCGC00263103-01	Pelitinib	EGFR	-1.1	0.4176	2.087	-6.3792	s-cd47-WT_JUR-1	NCGC00263103-01	-1.1	0.4176	2.597	-6.3792	0	-0.51	-0.323149
s-cd47-CD47-1	NCGC00347284-01	XL-647	EGFR	-2.1	11.7704	0.682	-4.9292	s-cd47-WT_JUR-1	NCGC00347284-01	-1.1	3.7221	1.135	-5.4292	0.5	-0.453	-0.319671
s-cd47-CD47-1	NCGC00263195-01	AV-412	EGFR	-1.1	2.3485	0.22	-5.6292	s-cd47-WT_JUR-1	NCGC00263195-01	-1.1	1.3207	0.397	-5.8792	0.25	-0.177	-0.302829
s-cd47-CD47-1	NCGC00346699-01	TAK-285	EGFR	-2.3	4.6859	4.424	-5.3292	s-cd47-WT_JUR-1	NCGC00346699-01	-2.1	23.485	4.437	-4.6292	-0.7	-0.013	-0.292822
s-cd47-CD47-1	NCGC00346724-01	Varlitinib tosylate	EGFR	-2.1	16.6261	13.313	-4.7792	s-cd47-WT_JUR-1	NCGC00346724-01	-2.1	16.6261	12.304	-4.7792	0	1.009	-0.230459
s-cd47-CD47-1	NCGC00346496-01	WZ-3146	EGFR	-2.1	13.2066	1.232	-4.8792	s-cd47-WT_JUR-1	NCGC00346496-01	-2.1	4.1763	0.173	-5.3792	0.5	1.059	-0.227408
s-cd47-CD47-1	NCGC00263177-01	CUDC-101	EGFR	-1.1	0.0526	4.513	-7.2792	s-cd47-WT_JUR-1	NCGC00263177-01	-1.1	0.0418	1.945	-7.3792	0.1	2.568	-0.135328
s-cd47-CD47-1	NCGC00346483-01	AC-480	EGFR	-2.2	5.8992	7.297	-5.2292	s-cd47-WT_JUR-1	NCGC00346483-01	-1.1	5.2576	4.719	-5.2792	0.05	2.578	-0.134718
s-cd47-CD47-1	NCGC00346957-01	HMSL10016	EGFR	-1.2	2.9566	24.119	-5.5292	s-cd47-WT_JUR-1	NCGC00346957-01	-1.1	4.6859	13.608	-5.3292	-0.2	10.511	0.349357
s-cd47-CD47-1	NCGC00241101-02	Neratinib	EGFR	-1.1	0.4686	33.071	-6.3292	s-cd47-WT_JUR-1	NCGC00241101-02	-2.1	2.9566	21.055	-5.5292	-0.8	12.016	0.441192
s-cd47-CD47-1	NCGC00164574-05	Erlotinib hydrochloride	EGFR	-1.2	4.6859	28.588	-5.3292	s-cd47-WT_JUR-1	NCGC00164574-05	-2.1	18.6548	13.067	-4.7292	-0.6	15.521	0.655069
s-cd47-CD47-1	NCGC00346578-01	OSI-420	EGFR	-1.1	3.7221	29.331	-5.4292	s-cd47-WT_JUR-1	NCGC00346578-01	-1.1	4.6859	12.145	-5.3292	-0.1	17.186	0.756668
s-cd47-CD47-1	NCGC00016017-07	AG-1478	EGFR	-1.3	1.4818	27.401	-5.8292	s-cd47-WT_JUR-1	NCGC00016017-07	-1.3	1.4818	9.569	-5.8292	0	17.832	0.796087
s-cd47-CD47-1	NCGC00346942-01	WHI-P97	EGFR	-1.2	0.2093	29.998	-6.6792	s-cd47-WT_JUR-1	NCGC00346942-01	-1.1	0.2957	11.343	-6.5292	-0.15	18.655	0.846307
s-cd47-CD47-1	NCGC00024956-02	PD-153035	EGFR	-1.2	1.177	31.617	-5.9292	s-cd47-WT_JUR-1	NCGC00024956-02	-1.1	2.3485	10.51	-5.6292	-0.3	21.107	0.995928
s-cd47-CD47-1	NCGC00346684-01	AG-1024	EGFR	-2.2	18.6548	55.705	-4.7292	s-cd47-WT_JUR-1	NCGC00346684-01	-2.1	18.6548	21.585	-4.7292	0	34.12	1.78999
s-cd47-CD47-1	NCGC00189220-05	UNC-0638	EHMT2	-1.1	6.619	1.041	-5.1792	s-cd47-WT_JUR-1	NCGC00189220-05	-1.1	4.1763	1.56	-5.3792	0.2	-0.519	-0.323698
s-cd47-CD47-1	NCGC00185850-02	BIX-01294	EHMT2	-1.1	5.2576	1.846	-5.2792	s-cd47-WT_JUR-1	NCGC00185850-02	-1.1	3.7221	2.216	-5.4292	0.15	-0.37	-0.314606
s-cd47-CD47-1	NCGC00346934-01	Sivelestat	ELA2	4		110.137		s-cd47-WT_JUR-1	NCGC00346934-01	4		109.649		0	0.488	-0.26225
s-cd47-CD47-1	NCGC00167751-03	SSR-69071	ELA2	-1.1	11.7704	15.368	-4.9292	s-cd47-WT_JUR-1	NCGC00167751-03	-2.1	16.6261	5.068	-4.7792	-0.15	10.3	0.336481
s-cd47-CD47-1	NCGC00024928-22	Tamoxifen	ER	-2.1	20.931	15.595	-4.6792	s-cd47-WT_JUR-1	NCGC00024928-22	-2.2	23.485	24.289	-4.6292	-0.05	-8.694	-0.822539
s-cd47-CD47-1	NCGC00182055-02	Bazedoxifene	ER	4	0.0166	114.02	-7.7792	s-cd47-WT_JUR-1	NCGC00182055-02	4		97.327		-7.7792	16.693	0.726585
s-cd47-CD47-1	NCGC00346672-01	ARRY-380	ERBB2	-2.1	18.6548	0.073	-4.7292	s-cd47-WT_JUR-1	NCGC00346672-01	-2.1	16.6261	1.132	-4.7792	0.05	-1.059	-0.356649
s-cd47-CD47-1	NCGC00346478-02	AST-1306	ERBB2	-1.1	1.049	-0.67	-5.9792	s-cd47-WT_JUR-1	NCGC00346478-02	-1.1	0.2635	0.302	-6.5792	0.6	-0.972	-0.35134
s-cd47-CD47-1	NCGC00263101-01	CP-724714	ERBB2	-2.2	23.485	31.738	-4.6292	s-cd47-WT_JUR-1	NCGC00263101-01	-2.2	23.485	32.635	-4.6292	0	-0.897	-0.346764
s-cd47-CD47-1	NCGC00346573-01	Sapitinib	ERBB2	-1.2	0.059	42.354	-7.2292	s-cd47-WT_JUR-1	NCGC00346573-01	-1.1	0.0469	14.043	-7.3292	0.1	28.311	1.43552
s-cd47-CD47-1	NCGC00346582-01	Mubritinib	ERBB2	-1.2	0.0332	45.69	-7.4792	s-cd47-WT_JUR-1	NCGC00346582-01	-1.2	0.0743	17.243	-7.1292	-0.35	28.447	1.44382
s-cd47-CD47-1	NCGC00250383-01	Irestatin 9389	ERN1	-2.2	16.6261	64.455	-4.7792	s-cd47-WT_JUR-1	NCGC00250383-01	4	33.1734	79.929	-4.4792	-0.3	-15.474	-1.23626
s-cd47-CD47-1	NCGC00263141-01	STF-083010	ERN1	-1.1	3.7221	34.106	-5.4292	s-cd47-WT_JUR-1	NCGC00263141-01	-2.1	14.818	14.896	-4.8292	-0.6	19.21	0.880173
s-cd47-CD47-1	NCGC00345819-01	Estetrol	ESR1	4		95.269		s-cd47-WT_JUR-1	NCGC00345819-01	4	1.049	116.311	-5.9792	5.9792	-21.042	-1.57602
s-cd47-CD47-1	NCGC00093347-06	Mestranol	ESR1	-3	37.2212	71.482	-4.4292	s-cd47-WT_JUR-1	NCGC00093347-06	4	33.1734	87.215	-4.4792	0.05	-15.733	-1.25206
s-cd47-CD47-1	NCGC00164385-04	Clomifene citrate	ESR1	4	37.2212	72.876	-4.4292	s-cd47-WT_JUR-1	NCGC00164385-04	4	0.1321	86.942	-6.8792	2.45	-14.066	-1.15034
s-cd47-CD47-1	NCGC00160530-03	Toremifene	ESR1	-2.4	29.5659	54.473	-4.5292	s-cd47-WT_JUR-1	NCGC00160530-03	-2.2	11.7704	68.413	-4.9292	0.4	-13.94	-1.14265
s-cd47-CD47-1	NCGC00015889-10	Raloxifene hydrochloride	ESR1	-2.1	16.6261	1.358	-4.7792	s-cd47-WT_JUR-1	NCGC00015889-10	-2.1	20.931	2.145	-4.6792	-0.1	-0.787	-0.340051
s-cd47-CD47-1	NCGC00015365-18	4',7-Dihydroxyisoflavanone	ESR1	4	0.1482	96.212	-6.8292	s-cd47-WT_JUR-1	NCGC00015365-18	4	11.7704	92.868	-4.9292	-1.9	3.344	-0.0879762
s-cd47-CD47-1	NCGC00024762-05	Tesmilifene hydrochloride	ESR1	4	37.2212	98.441	-4.4292	s-cd47-WT_JUR-1	NCGC00024762-05	4	0.1321	89.41	-6.8792	2.45	9.031	0.259047
s-cd47-CD47-1	NCGC00018153-09	Dienestrol	ESR1	-2.2	20.931	30.237	-4.6792	s-cd47-WT_JUR-1	NCGC00018153-09	-2.1	20.931	20.982	-4.6792	0	9.255	0.272715
s-cd47-CD47-1	NCGC00274061-01	Trilostane	ESR1	-3	20.931	67.214	-4.6792	s-cd47-WT_JUR-1	NCGC00274061-01	-2.2	18.6548	57.917	-4.7292	0.05	9.297	0.275278
s-cd47-CD47-1	NCGC00090749-11	Diethylstilbestrol	ESR1	-2.2	16.6261	36.159	-4.7792	s-cd47-WT_JUR-1	NCGC00090749-11	-2.1	14.818	26.164	-4.8292	0.05	9.995	0.31787
s-cd47-CD47-1	NCGC00091533-11	Ethinylestradiol	ESR1	-2.2	13.2066	27.72	-4.8792	s-cd47-WT_JUR-1	NCGC00091533-11	-2.1	11.7704	14.043	-4.9292	0.05	13.677	0.542547
s-cd47-CD47-1	NCGC00164789-05	Fulvestrant	ESR1	4	0.8333	115.287	-6.0792	s-cd47-WT_JUR-1	NCGC00164789-05	4	20.931	98.008	-4.6792	-1.4	17.279	0.762343
s-cd47-CD47-1	NCGC00346557-01	Erteberel	ESR1	-1.2	3.7221	36.502	-5.4292	s-cd47-WT_JUR-1	NCGC00346557-01	-1.1	3.3173	17.67	-5.4792	0.05	18.832	0.857107
s-cd47-CD47-1	NCGC00091544-08	Estradiol	ESR1	-2.2	13.2066	38.451	-4.8792	s-cd47-WT_JUR-1	NCGC00091544-08	-2.1	11.7704	18.315	-4.9292	0.05	20.136	0.936678
s-cd47-CD47-1	NCGC00166111-04	Estriol	ESR1	4		120.332		s-cd47-WT_JUR-1	NCGC00166111-04	-3	26.3506	72.648	-4.5792	4.5792	47.684	2.61767
s-cd47-CD47-1	NCGC00346886-01	YK-4-279	EWSR1	-1.1	0.935	38.318	-6.0292	s-cd47-WT_JUR-1	NCGC00346886-01	-1.1	0.1663	14.615	-6.7792	0.75	23.703	1.15434
s-cd47-CD47-1	NCGC00262945-02	Rivaroxaban	F10	1.4	0.0059	79.666	-8.2292	s-cd47-WT_JUR-1	NCGC00262945-02	4	0.0094	93.699	-8.0292	-0.2	-14.033	-1.14833
s-cd47-CD47-1	NCGC00346555-01	Apixaban	F10	1.4	0.0021	107.984	-8.6792	s-cd47-WT_JUR-1	NCGC00346555-01	4	0.001	95.972	-8.9792	0.3	12.012	0.440948
s-cd47-CD47-1	NCGC00263131-01	PF-3845	FAAH	-2.2	13.2066	61.895	-4.8792	s-cd47-WT_JUR-1	NCGC00263131-01	-2.2	18.6548	59.386	-4.7292	-0.15	2.509	-0.138928
s-cd47-CD47-1	NCGC00165915-03	KDS-4103	FAAH	4	0.4176	115.969	-6.3792	s-cd47-WT_JUR-1	NCGC00165915-03	4	0.1321	111.824	-6.8792	0.5	4.145	-0.0390989
s-cd47-CD47-1	NCGC00263281-01	GSK-1995010	FAS	-2.2	18.6548	57.271	-4.7292	s-cd47-WT_JUR-1	NCGC00263281-01	-2.2	13.2066	75.746	-4.8792	0.15	-18.475	-1.41938
s-cd47-CD47-1	NCGC00263229-01	GSK837149A	FAS	-2.2	10.4904	45.034	-4.9792	s-cd47-WT_JUR-1	NCGC00263229-01	-2.2	9.3495	51.965	-5.0292	0.05	-6.931	-0.71496
s-cd47-CD47-1	NCGC00263228-01	FASN BI	FAS	-2.2	14.818	67.903	-4.8292	s-cd47-WT_JUR-1	NCGC00263228-01	4	18.6548	74.526	-4.7292	-0.1	-6.623	-0.696166
s-cd47-CD47-1	NCGC00015833-16	Pyrazinamide	FAS	1.4	0.2957	99.976	-6.5292	s-cd47-WT_JUR-1	NCGC00015833-16	4	0.0209	100.939	-7.6792	1.15	-0.963	-0.350791
s-cd47-CD47-1	NCGC00165772-02	C-75	FAS	4		96.491		s-cd47-WT_JUR-1	NCGC00165772-02	1.4	0.0037	95.25	-8.4292	8.4292	1.241	-0.216302
s-cd47-CD47-1	NCGC00263230-01	FASN MRK	FAS	-2.2	24.1005	62.825	-4.618	s-cd47-WT_JUR-1	NCGC00263230-01	-2.2	24.1005	51.932	-4.618	0	10.893	0.372666
s-cd47-CD47-1	NCGC00095128-04	Orlistat	FAS	4	7.4266	85.932	-5.1292	s-cd47-WT_JUR-1	NCGC00095128-04	-1.2	2.9566	70.37	-5.5292	0.4	15.562	0.657571
s-cd47-CD47-1	NCGC00163492-04	Cerulenin	FAS	-2.4	26.3506	39.947	-4.5792	s-cd47-WT_JUR-1	NCGC00163492-04	-3	26.3506	10.602	-4.5792	0	29.345	1.49861
s-cd47-CD47-1	NCGC00159521-05	Zoledronic acid monohydrate	FDPS	4		110.133		s-cd47-WT_JUR-1	NCGC00159521-05	4	1.1471	123.467	-5.9404	5.9404	-13.334	-1.10567
s-cd47-CD47-1	NCGC00346521-01	Risedronate sodium	FDPS	4	0.1482	107.762	-6.8292	s-cd47-WT_JUR-1	NCGC00346521-01	4		111.023		-6.8292	-3.261	-0.491016
s-cd47-CD47-1	NCGC00167811-03	GW-9508	FFAR1	4	11.7704	93.009	-4.9292	s-cd47-WT_JUR-1	NCGC00167811-03	4	0.0023	104.708	-8.6292	3.7	-11.699	-1.00591
s-cd47-CD47-1	NCGC00163318-03	Suramin sodium	FGF2	4	0.001	78.029	-8.9792	s-cd47-WT_JUR-1	NCGC00163318-03	-2.4	37.2212	82.917	-4.4292	-4.55	-4.888	-0.590296
s-cd47-CD47-1	NCGC00263125-01	SG-00529	FGF2	-2.2	23.485	39.325	-4.6292	s-cd47-WT_JUR-1	NCGC00263125-01	-2.3	20.931	14.623	-4.6792	0.05	24.702	1.2153
s-cd47-CD47-1	NCGC00274030-01	BGJ-398	FGFR	-1.4	5.2576	71.304	-5.2792	s-cd47-WT_JUR-1	NCGC00274030-01	-1.2	4.6859	85.645	-5.3292	0.05	-14.341	-1.16712
s-cd47-CD47-1	NCGC00263152-02	Ponatinib	FGFR	-1.1	4.1763	0.597	-5.3792	s-cd47-WT_JUR-1	NCGC00263152-02	-1.1	3.3173	1.915	-5.4792	0.1	-1.318	-0.372453
s-cd47-CD47-1	NCGC00165863-02	PD-173074	FGFR	-2.1	14.818	-0.452	-4.8292	s-cd47-WT_JUR-1	NCGC00165863-02	-2.1	10.4904	0.514	-4.9792	0.15	-0.966	-0.350974
s-cd47-CD47-1	NCGC00346713-01	AZD-4547	FGFR	-2.1	18.6548	2.217	-4.7292	s-cd47-WT_JUR-1	NCGC00346713-01	-2.1	26.3506	3.039	-4.5792	-0.15	-0.822	-0.342187
s-cd47-CD47-1	NCGC00249685-02	Dovitinib	FGFR	-2.1	14.818	1.123	-4.8292	s-cd47-WT_JUR-1	NCGC00249685-02	-2.1	10.4904	1.566	-4.9792	0.15	-0.443	-0.31906
s-cd47-CD47-1	NCGC00346878-01	SU-5402	FGFR	-2.4	20.931	63.091	-4.6792	s-cd47-WT_JUR-1	NCGC00346878-01	-2.2	20.931	53.568	-4.6792	0	9.523	0.289069
s-cd47-CD47-1	NCGC00346459-01	LY-2874455	FGFR	-2.2	23.485	21.528	-4.6292	s-cd47-WT_JUR-1	NCGC00346459-01	-2.1	20.931	8.263	-4.6792	0.05	13.265	0.517407
s-cd47-CD47-1	NCGC00091823-05	Chrysophanol	FLT1	4		96.044		s-cd47-WT_JUR-1	NCGC00091823-05	4	0.5899	104.661	-6.2292	6.2292	-8.617	-0.817841
s-cd47-CD47-1	NCGC00346548-01	KRN-633	FLT1	4	0.0372	85.127	-7.4292	s-cd47-WT_JUR-1	NCGC00346548-01	4	37.2212	90.486	-4.4292	-3	-5.359	-0.619036
s-cd47-CD47-1	NCGC00167768-02	KI-8751	FLT1	4	3.3173	75.017	-5.4792	s-cd47-WT_JUR-1	NCGC00167768-02	-2.4	11.7704	76.718	-4.9292	-0.55	-1.701	-0.395824
s-cd47-CD47-1	NCGC00345821-01	AG-13958	FLT1	-2.1	14.818	3.599	-4.8292	s-cd47-WT_JUR-1	NCGC00345821-01	-2.1	13.2066	4.882	-4.8792	0.05	-1.283	-0.370317
s-cd47-CD47-1	NCGC00167488-03	Sorafenib	FLT1	-2.1	20.931	1.026	-4.6792	s-cd47-WT_JUR-1	NCGC00167488-03	-2.1	14.818	1.996	-4.8292	0.15	-0.97	-0.351218
s-cd47-CD47-1	NCGC00346695-01	MK-2461	FLT1	-1.2	3.3173	29.898	-5.4792	s-cd47-WT_JUR-1	NCGC00346695-01	-2.1	11.7704	30.81	-4.9292	-0.55	-0.912	-0.347679
s-cd47-CD47-1	NCGC00164631-03	Sunitinib malate	FLT1	-1.1	6.7925	0.656	-5.168	s-cd47-WT_JUR-1	NCGC00164631-03	-1.1	7.6213	1.31	-5.118	-0.05	-0.654	-0.331936
s-cd47-CD47-1	NCGC00263097-01	Cediranib	FLT1	-2.1	20.931	2.569	-4.6792	s-cd47-WT_JUR-1	NCGC00263097-01	-2.1	26.3506	3.033	-4.5792	-0.1	-0.464	-0.320342
s-cd47-CD47-1	NCGC00241108-03	Axitinib	FLT1	-2.1	29.5659	26.242	-4.5292	s-cd47-WT_JUR-1	NCGC00241108-03	-2.1	18.6548	25.143	-4.7292	0.2	1.099	-0.224967
s-cd47-CD47-1	NCGC00345858-01	Takeda-6d	FLT1	-2.2	5.2576	63.091	-5.2792	s-cd47-WT_JUR-1	NCGC00345858-01	-1.2	3.7221	59.55	-5.4292	0.15	3.541	-0.0759552
s-cd47-CD47-1	NCGC00249393-01	Apatinib	FLT1	-2.2	18.6548	82.47	-4.7292	s-cd47-WT_JUR-1	NCGC00249393-01	-3	20.931	71.014	-4.6792	-0.05	11.456	0.407021
s-cd47-CD47-1	NCGC00249390-01	Tivozanib	FLT1	-2.1	26.3506	30.389	-4.5792	s-cd47-WT_JUR-1	NCGC00249390-01	-2.1	13.2066	8.955	-4.8792	0.3	21.434	1.01588
s-cd47-CD47-1	NCGC00241113-01	Orantinib	FLT1	-2.2	16.6261	36.73	-4.7792	s-cd47-WT_JUR-1	NCGC00241113-01	-1.1	1.4818	6.657	-5.8292	1.05	30.073	1.54304
s-cd47-CD47-1	NCGC00345847-01	JNJ-38158471	FLT1	-1.2	4.1763	64.339	-5.3792	s-cd47-WT_JUR-1	NCGC00345847-01	-1.1	3.7221	28.354	-5.4292	0.05	35.985	1.90379
s-cd47-CD47-1	NCGC00263156-02	Vargatef	FLT1	-2.2	14.818	50.125	-4.8292	s-cd47-WT_JUR-1	NCGC00263156-02	-1.1	3.3173	12.253	-5.4792	0.65	37.872	2.01893
s-cd47-CD47-1	NCGC00263198-01	Lenvatinib	FLT1	-2.2	16.6261	51.428	-4.7792	s-cd47-WT_JUR-1	NCGC00263198-01	-1.1	2.6351	5.012	-5.5792	0.8	46.416	2.54029
s-cd47-CD47-1	NCGC00263205-01	Motesanib	FLT1	-3	37.2212	68.692	-4.4292	s-cd47-WT_JUR-1	NCGC00263205-01	-2.3	20.931	21.286	-4.6792	0.25	47.406	2.6007
s-cd47-CD47-1	NCGC00262331-01	NCGC00262331	FLT3	4	20.931	70.379	-4.6792	s-cd47-WT_JUR-1	NCGC00262331-01	-2.4	18.6548	68.85	-4.7292	0.05	1.529	-0.198728
s-cd47-CD47-1	NCGC00262376-01	NCGC00262376	FLT3	-2.2	16.6261	28.154	-4.7792	s-cd47-WT_JUR-1	NCGC00262376-01	-2.1	23.485	9.4	-4.6292	-0.15	18.754	0.852348
s-cd47-CD47-1	NCGC00346964-01	HMSL10084	FLT3	-1.1	0.4686	24.556	-6.3292	s-cd47-WT_JUR-1	NCGC00346964-01	-1.1	0.4686	2.486	-6.3292	0	22.07	1.05469
s-cd47-CD47-1	NCGC00346965-01	HMSL10087	FLT4	-3	37.2212	3.261	-4.4292	s-cd47-WT_JUR-1	NCGC00346965-01	-2.1	23.485	2.648	-4.6292	0.2	0.613	-0.254623
s-cd47-CD47-1	NCGC00270540-03	Miglitol	GAA	4		106.848		s-cd47-WT_JUR-1	NCGC00270540-03	4	1.8655	109.033	-5.7292	5.7292	-2.185	-0.425358
s-cd47-CD47-1	NCGC00160515-03	Acarbose	GAA	1.4	0.0264	117.155	-7.5792	s-cd47-WT_JUR-1	NCGC00160515-03	1.4	0.0017	106.727	-8.7792	1.2	10.428	0.344292
s-cd47-CD47-1	NCGC00015429-08	Felbamate	GABRA1	4	0.935	99.813	-6.0292	s-cd47-WT_JUR-1	NCGC00015429-08	4	5.8992	122.614	-5.2292	-0.8	-22.801	-1.68335
s-cd47-CD47-1	NCGC00186006-04	Nefiracetam	GABRA1	4	0.0332	89.165	-7.4792	s-cd47-WT_JUR-1	NCGC00186006-04	4	0.001	106.401	-8.9792	1.5	-17.236	-1.34378
s-cd47-CD47-1	NCGC00346880-01	Indiplon	GABRA1	4	13.2066	82.665	-4.8792	s-cd47-WT_JUR-1	NCGC00346880-01	4	20.931	99.491	-4.6792	-0.2	-16.826	-1.31876
s-cd47-CD47-1	NCGC00025176-01	Etomidate	GABRA1	4	0.0332	104.781	-7.4792	s-cd47-WT_JUR-1	NCGC00025176-01	4		120.059		-7.4792	-15.278	-1.2243
s-cd47-CD47-1	NCGC00015191-06	Chlormezanone	GABRA1	4		90.788		s-cd47-WT_JUR-1	NCGC00015191-06	4		105.675		0	-14.887	-1.20044
s-cd47-CD47-1	NCGC00159515-02	Zopiclone	GABRA1	4	20.931	100.625	-4.6792	s-cd47-WT_JUR-1	NCGC00159515-02	4		110.926		-4.6792	-10.301	-0.920599
s-cd47-CD47-1	NCGC00015439-06	Flumazenil	GABRA1	-3	41.7629	74.394	-4.3792	s-cd47-WT_JUR-1	NCGC00015439-06	-3	33.1734	76.995	-4.4792	0.1	-2.601	-0.450742
s-cd47-CD47-1	NCGC00346666-01	Ginkgolide A	GABRA1	-2.4	9.3495	78.433	-5.0292	s-cd47-WT_JUR-1	NCGC00346666-01	-2.2	16.6261	78.834	-4.7792	-0.25	-0.401	-0.316497
s-cd47-CD47-1	NCGC00346588-01	Bilobalide	GABRA1	-3	18.6548	79.012	-4.7292	s-cd47-WT_JUR-1	NCGC00346588-01	-3	23.485	68.396	-4.6292	-0.1	10.616	0.355764
s-cd47-CD47-1	NCGC00025245-01	Ginkgolide B	GABRA1	-2.2	23.485	66.994	-4.6292	s-cd47-WT_JUR-1	NCGC00025245-01	-2.2	20.931	50.159	-4.6792	0.05	16.835	0.735249
s-cd47-CD47-1	NCGC00346604-01	Dihydromyricetin	GABRA1	-1.2	1.3207	36.707	-5.8792	s-cd47-WT_JUR-1	NCGC00346604-01	-2.1	13.2066	15.036	-4.8792	-1	21.671	1.03034
s-cd47-CD47-1	NCGC00095694-05	Osthol	GABRA1	-1.2	1.3207	60.073	-5.8792	s-cd47-WT_JUR-1	NCGC00095694-05	-1.1	2.6351	35.688	-5.5792	-0.3	24.385	1.19595
s-cd47-CD47-1	NCGC00238624-04	NCGC00238624	GALK1	-2.2	16.6261	63.92	-4.7792	s-cd47-WT_JUR-1	NCGC00238624-04	-2.2	10.4904	70.227	-4.9792	0.2	-6.307	-0.676884
s-cd47-CD47-1	NCGC00346431-01	Omigapil	GAPDH	-3	33.1734	56.257	-4.4792	s-cd47-WT_JUR-1	NCGC00346431-01	-2.4	16.6261	65.149	-4.7792	0.3	-8.892	-0.834621
s-cd47-CD47-1	NCGC00017254-02	Cyanein	GBF1	-1.2	0.0047	17.146	-8.3292	s-cd47-WT_JUR-1	NCGC00017254-02	-1.1	0.0094	5.758	-8.0292	-0.3	11.388	0.402872
s-cd47-CD47-1	NCGC00346628-01	LY-2608204	GCK	-2.1	13.2066	2.362	-4.8792	s-cd47-WT_JUR-1	NCGC00346628-01	-2.1	14.818	2.451	-4.8292	-0.05	-0.089	-0.297459
s-cd47-CD47-1	NCGC00263115-01	Ibutamoren mesilate	GH1	-2.2	18.6548	65.404	-4.7292	s-cd47-WT_JUR-1	NCGC00263115-01	-2.2	18.6548	61.154	-4.7292	0	4.25	-0.0326918
s-cd47-CD47-1	NCGC00263232-01	GLS968	GLS	-2.2	16.6261	47.326	-4.7792	s-cd47-WT_JUR-1	NCGC00263232-01	-2.2	16.6261	69.491	-4.7792	0	-22.165	-1.64454
s-cd47-CD47-1	NCGC00346568-01	GSK-1292263A	GPR119	-1.2	6.619	80.867	-5.1792	s-cd47-WT_JUR-1	NCGC00346568-01	-2.2	4.6859	70.33	-5.3292	0.15	10.537	0.350943
s-cd47-CD47-1	NCGC00186046-02	Caroverine hydrochloride	GR1A1	4	11.7704	98.324	-4.9292	s-cd47-WT_JUR-1	NCGC00186046-02	4		104.077		-4.9292	-5.753	-0.643078
s-cd47-CD47-1	NCGC00015463-02	GYKI-52466	GR1A1	-3	37.2212	67.004	-4.4292	s-cd47-WT_JUR-1	NCGC00015463-02	-3	37.2212	70.383	-4.4292	0	-3.379	-0.498216
s-cd47-CD47-1	NCGC00263113-01	GYKI-53655	GR1A1	-2.2	16.6261	60.669	-4.7792	s-cd47-WT_JUR-1	NCGC00263113-01	-2.2	16.6261	45.835	-4.7792	0	14.834	0.613148
s-cd47-CD47-1	NCGC00182554-02	Latrepirdine hydrochloride	GRIN2A	-2.2	16.6261	51.059	-4.7792	s-cd47-WT_JUR-1	NCGC00182554-02	4	33.1734	81.668	-4.4792	-0.3	-30.609	-2.1598
s-cd47-CD47-1	NCGC00168041-01	Dextromethorphan hydrobromide	GRIN2A	4	16.6261	93.159	-4.7792	s-cd47-WT_JUR-1	NCGC00168041-01	4	0.935	115.863	-6.0292	1.25	-22.704	-1.67743
s-cd47-CD47-1	NCGC00253740-01	Lacosamide	GRIN2A	4		101.271		s-cd47-WT_JUR-1	NCGC00253740-01	4	16.6261	121.88	-4.7792	4.7792	-20.609	-1.5496
s-cd47-CD47-1	NCGC00092329-01	Eliprodil	GRIN2A	4	0.3722	88.434	-6.4292	s-cd47-WT_JUR-1	NCGC00092329-01	4		101.035		-6.4292	-12.601	-1.06095
s-cd47-CD47-1	NCGC00346887-01	TCN-201	GRIN2A	4	0.935	109.91	-6.0292	s-cd47-WT_JUR-1	NCGC00346887-01	4	0.0833	114.2	-7.0792	1.05	-4.29	-0.553806
s-cd47-CD47-1	NCGC00263106-01	Gavestinel sodium	GRIN2A	4		108.787		s-cd47-WT_JUR-1	NCGC00263106-01	4		112.417		0	-3.63	-0.513532
s-cd47-CD47-1	NCGC00015705-04	Memantine hydrochloride	GRIN2A	4	0.0209	118.083	-7.6792	s-cd47-WT_JUR-1	NCGC00015705-04	4	0.003	118.142	-8.5292	0.85	-0.059	-0.295629
s-cd47-CD47-1	NCGC00016306-07	D-Cycloserine	GRIN2A	4		106.33		s-cd47-WT_JUR-1	NCGC00016306-07	4		103.998		0	2.332	-0.149729
s-cd47-CD47-1	NCGC00015937-02	Spermidine	GRIN2A	4		82.208		s-cd47-WT_JUR-1	NCGC00015937-02	-2.1	20.931	20.847	-4.6792	4.6792	61.361	3.45224
s-cd47-CD47-1	NCGC00015882-09	Riluzole	GRM1	-2.4	29.5659	68.16	-4.5292	s-cd47-WT_JUR-1	NCGC00015882-09	-2.2	16.6261	71.177	-4.7792	0.25	-3.017	-0.476127
s-cd47-CD47-1	NCGC00092375-02	JNJ-16259685	GRM1	-2.1	23.485	0.24	-4.6292	s-cd47-WT_JUR-1	NCGC00092375-02	-2.1	20.931	1.513	-4.6792	0.05	-1.273	-0.369707
s-cd47-CD47-1	NCGC00346612-01	LY-2140023	GRM2	4	26.3506	77.59	-4.5792	s-cd47-WT_JUR-1	NCGC00346612-01	4	0.0021	86.209	-8.6792	4.1	-8.619	-0.817963
s-cd47-CD47-1	NCGC00015682-02	MPEP	GRM5	-2.2	26.3506	71.271	-4.5792	s-cd47-WT_JUR-1	NCGC00015682-02	-2.2	18.6548	77.044	-4.7292	0.15	-5.773	-0.644299
s-cd47-CD47-1	NCGC00346706-01	VU0357121	GRM5	4	0.0026	96.407	-8.5792	s-cd47-WT_JUR-1	NCGC00346706-01	4	0.0023	101.659	-8.6292	0.05	-5.252	-0.612507
s-cd47-CD47-1	NCGC00346722-01	ADX-47273	GRM5	-1.2	0.4686	83.922	-6.3292	s-cd47-WT_JUR-1	NCGC00346722-01	-2.2	14.818	82.776	-4.8292	-1.5	1.146	-0.222099
s-cd47-CD47-1	NCGC00092384-04	Fenobam	GRM5	-3	33.1734	9.103	-4.4792	s-cd47-WT_JUR-1	NCGC00092384-04	-3	37.2212	1.202	-4.4292	-0.05	7.901	0.190094
s-cd47-CD47-1	NCGC00263194-01	SB-216763	GSK3B	-3	26.3506	56.591	-4.5792	s-cd47-WT_JUR-1	NCGC00263194-01	1.4	0.0019	59.519	-8.7292	4.15	-2.928	-0.470696
s-cd47-CD47-1	NCGC00094112-06	BIO	GSK3B	-2.1	13.2066	0.901	-4.8792	s-cd47-WT_JUR-1	NCGC00094112-06	-2.1	8.3328	1.161	-5.0792	0.2	-0.26	-0.307894
s-cd47-CD47-1	NCGC00250379-03	CT-99021	GSK3B	-2.4	18.6548	43.164	-4.7292	s-cd47-WT_JUR-1	NCGC00250379-03	1.1	0.0026	38.486	-8.5792	3.85	4.678	-0.00657507
s-cd47-CD47-1	NCGC00015950-07	SB-415286	GSK3B	-3	23.485	57.4	-4.6292	s-cd47-WT_JUR-1	NCGC00015950-07	-3	26.3506	51.877	-4.5792	-0.05	5.523	0.0449871
s-cd47-CD47-1	NCGC00346883-01	6-Bromoindirubin-3'-acetoxime	GSK3B	-2.1	10.4904	8.792	-4.9792	s-cd47-WT_JUR-1	NCGC00346883-01	-1.1	5.8992	2.914	-5.2292	0.25	5.878	0.0666494
s-cd47-CD47-1	NCGC00346677-01	CT-98014	GSK3B	-2.2	16.6261	25.358	-4.7792	s-cd47-WT_JUR-1	NCGC00346677-01	-2.1	16.6261	15.762	-4.7792	0	9.596	0.293523
s-cd47-CD47-1	NCGC00162288-06	Valproic acid sodium salt	GSK3B	4		104.177		s-cd47-WT_JUR-1	NCGC00162288-06	4	0.0026	94.107	-8.5792	8.5792	10.07	0.322447
s-cd47-CD47-1	NCGC00345024-01	GSK3 Inhibitor	GSK3B	-2.2	6.619	36.248	-5.1792	s-cd47-WT_JUR-1	NCGC00345024-01	-2.2	20.931	22.827	-4.6792	-0.5	13.421	0.526926
s-cd47-CD47-1	NCGC00017363-10	cycloheximide	GSK3B	-1.2	0.0935	30.591	-7.0292	s-cd47-WT_JUR-1	NCGC00017363-10	-1.1	0.1482	14.116	-6.8292	-0.2	16.475	0.713282
s-cd47-CD47-1	NCGC00346638-01	TWS-119	GSK3B	-1.1	5.2576	41.471	-5.2792	s-cd47-WT_JUR-1	NCGC00346638-01	-1.1	2.9566	15.256	-5.5292	0.25	26.215	1.30762
s-cd47-CD47-1	NCGC00015148-07	Buthionine sulphoximine	GSS	4	0.2093	104.078	-6.6792	s-cd47-WT_JUR-1	NCGC00015148-07	4		110.117		-6.6792	-6.039	-0.66053
s-cd47-CD47-1	NCGC00263221-01	Ezatiostat	GSTP1	4	10.4904	113.889	-4.9792	s-cd47-WT_JUR-1	NCGC00263221-01	-3	26.3506	68.407	-4.5792	-0.4	45.482	2.4833
s-cd47-CD47-1	NCGC00263227-01	BAY-41-8543	GUCY1A2	1.4	0.0033	89.414	-8.4792	s-cd47-WT_JUR-1	NCGC00263227-01	4	16.6261	90.061	-4.7792	-3.7	-0.647	-0.331508
s-cd47-CD47-1	NCGC00263121-01	MG-149	HAT1	-2.2	14.818	53.189	-4.8292	s-cd47-WT_JUR-1	NCGC00263121-01	-2.4	16.6261	56.01	-4.7792	-0.05	-2.821	-0.464167
s-cd47-CD47-1	NCGC00181343-01	Ivabradine hydrochloride	HCN	-2.2	20.931	72.907	-4.6792	s-cd47-WT_JUR-1	NCGC00181343-01	-3	26.3506	61.958	-4.5792	-0.1	10.949	0.376084
s-cd47-CD47-1	NCGC00024929-01	ICI-D7288	HCN	-3	26.3506	27.963	-4.5792	s-cd47-WT_JUR-1	NCGC00024929-01	-3	37.2212	5.518	-4.4292	-0.15	22.445	1.07757
s-cd47-CD47-1	NCGC00025330-01	SB-408124	HCRTR1	-2.4	29.5659	50.614	-4.5292	s-cd47-WT_JUR-1	NCGC00025330-01	-2.1	16.6261	23.067	-4.7792	0.25	27.547	1.3889
s-cd47-CD47-1	NCGC00263220-02	Romidepsin	HDAC1	-1.1	0.0187	1.397	-7.7292	s-cd47-WT_JUR-1	NCGC00263220-02	-1.1	0.0166	2.574	-7.7792	0.05	-1.177	-0.363849
s-cd47-CD47-1	NCGC00346487-01	Quisinostat hydrochloride	HDAC1	-1.1	0.0833	1.394	-7.0792	s-cd47-WT_JUR-1	NCGC00346487-01	-1.1	0.0526	1.16	-7.2792	0.2	0.234	-0.27775
s-cd47-CD47-1	NCGC00250390-01	ISOX	HDAC1	-1.1	1.3207	2.617	-5.8792	s-cd47-WT_JUR-1	NCGC00250390-01	-1.1	0.6619	2.023	-6.1792	0.3	0.594	-0.255782
s-cd47-CD47-1	NCGC00346486-01	Abexinostat	HDAC1	-1.1	1.3207	2.49	-5.8792	s-cd47-WT_JUR-1	NCGC00346486-01	-1.1	0.4686	1.4	-6.3292	0.45	1.09	-0.225516
s-cd47-CD47-1	NCGC00263617-05	M344	HDAC1	-1.1	0.5258	2.9	-6.2792	s-cd47-WT_JUR-1	NCGC00263617-05	-1.1	0.1663	1.756	-6.7792	0.5	1.144	-0.222221
s-cd47-CD47-1	NCGC00346948-01	Oxamflatin	HDAC1	-1.1	1.6626	2.138	-5.7792	s-cd47-WT_JUR-1	NCGC00346948-01	-1.1	0.7427	0.856	-6.1292	0.35	1.282	-0.2138
s-cd47-CD47-1	NCGC00346743-01	Givinostat hydrochloride	HDAC1	-1.1	0.7427	3.406	-6.1292	s-cd47-WT_JUR-1	NCGC00346743-01	-1.1	0.4686	2.007	-6.3292	0.2	1.399	-0.206661
s-cd47-CD47-1	NCGC00263153-05	AR-42	HDAC1	-1.1	0.935	4.795	-6.0292	s-cd47-WT_JUR-1	NCGC00263153-05	-1.1	0.2957	3.378	-6.5292	0.5	1.417	-0.205562
s-cd47-CD47-1	NCGC00263136-03	Pracinostat	HDAC1	-1.1	0.1482	4.773	-6.8292	s-cd47-WT_JUR-1	NCGC00263136-03	-1.1	0.1049	3.263	-6.9792	0.15	1.51	-0.199888
s-cd47-CD47-1	NCGC00168085-02	Vorinostat	HDAC1	-1.1	2.6351	4.387	-5.5792	s-cd47-WT_JUR-1	NCGC00168085-02	-1.1	1.3207	2.851	-5.8792	0.3	1.536	-0.198301
s-cd47-CD47-1	NCGC00162453-10	Trichostatin A	HDAC1	-1.1	0.6619	0.791	-6.1792	s-cd47-WT_JUR-1	NCGC00162453-10	-1.1	0.2093	-0.99	-6.6792	0.5	1.781	-0.183351
s-cd47-CD47-1	NCGC00263117-02	Panobinostat	HDAC1	-1.1	0.1049	6.753	-6.9792	s-cd47-WT_JUR-1	NCGC00263117-02	-1.1	0.0743	4.97	-7.1292	0.15	1.783	-0.183229
s-cd47-CD47-1	NCGC00345539-02	Dacinostat	HDAC1	-1.1	0.2348	3.065	-6.6292	s-cd47-WT_JUR-1	NCGC00345539-02	-1.1	0.1049	0.829	-6.9792	0.35	2.236	-0.155587
s-cd47-CD47-1	NCGC00263155-01	Belinostat	HDAC1	-1.1	1.9144	4.473	-5.718	s-cd47-WT_JUR-1	NCGC00263155-01	-1.1	0.9595	1.897	-6.018	0.3	2.576	-0.13484
s-cd47-CD47-1	NCGC00346891-01	Pyroxamide	HDAC1	-1.1	4.1763	6.438	-5.3792	s-cd47-WT_JUR-1	NCGC00346891-01	-1.1	2.3485	3.055	-5.6292	0.25	3.383	-0.0855964
s-cd47-CD47-1	NCGC00263182-02	Mocetinostat	HDAC1	-1.1	2.6351	17.21	-5.5792	s-cd47-WT_JUR-1	NCGC00263182-02	-1.1	0.5899	3.872	-6.2292	0.65	13.338	0.521861
s-cd47-CD47-1	NCGC00165833-04	Entinostat	HDAC1	-1.1	2.6351	21.338	-5.5792	s-cd47-WT_JUR-1	NCGC00165833-04	-1.1	0.8333	2.566	-6.0792	0.5	18.772	0.853446
s-cd47-CD47-1	NCGC00346534-01	MC-1568	HDAC2	-3	26.3506	33.439	-4.5792	s-cd47-WT_JUR-1	NCGC00346534-01	-2.2	20.931	24.736	-4.6792	0.1	8.703	0.239032
s-cd47-CD47-1	NCGC00345802-01	ACY-1215	HDAC6	-1.1	4.1763	1.766	-5.3792	s-cd47-WT_JUR-1	NCGC00345802-01	-1.1	2.9566	1.37	-5.5292	0.15	0.396	-0.267864
s-cd47-CD47-1	NCGC00346840-01	Tubacin	HDAC6	-1.1	8.3328	3.846	-5.0792	s-cd47-WT_JUR-1	NCGC00346840-01	-1.1	8.3328	2.025	-5.0792	0	1.821	-0.18091
s-cd47-CD47-1	NCGC00087387-03	Droxinostat	HDAC6	-2.1	5.8992	11.244	-5.2292	s-cd47-WT_JUR-1	NCGC00087387-03	-1.1	5.8992	5.028	-5.2292	0	6.216	0.0872742
s-cd47-CD47-1	NCGC00263606-03	Tubastatin A	HDAC6	-2.1	14.818	8.957	-4.8292	s-cd47-WT_JUR-1	NCGC00263606-03	-2.1	11.7704	2.19	-4.9292	0.1	6.767	0.120896
s-cd47-CD47-1	NCGC00345786-01	Compound 7	HDAC6	-2.1	18.6548	16.463	-4.7292	s-cd47-WT_JUR-1	NCGC00345786-01	-2.1	16.6261	1.732	-4.7792	0.05	14.731	0.606863
s-cd47-CD47-1	NCGC00345492-02	PCI-34051	HDAC8	-2.2	11.7704	74.801	-4.9292	s-cd47-WT_JUR-1	NCGC00345492-02	-1.2	8.3328	33.723	-5.0792	0.15	41.078	2.21457
s-cd47-CD47-1	NCGC00016103-06	Lificiguat	HIF1A	-1.4	2.9566	101.354	-5.5292	s-cd47-WT_JUR-1	NCGC00016103-06	4	20.931	97.856	-4.6792	-0.85	3.498	-0.0785791
s-cd47-CD47-1	NCGC00346527-01	FG-4592	HIF1A	4		116.623		s-cd47-WT_JUR-1	NCGC00346527-01	4		109.691		0	6.932	0.130965
s-cd47-CD47-1	NCGC00025300-01	2-Methoxyestradiol	HIF1A	-2.4	6.619	45.435	-5.1792	s-cd47-WT_JUR-1	NCGC00025300-01	-1.1	0.4686	21.899	-6.3292	1.15	23.536	1.14415
s-cd47-CD47-1	NCGC00344625-02	IOX2	HIF1A	4		113.814		s-cd47-WT_JUR-1	NCGC00344625-02	4	18.6548	89.375	-4.7292	4.7292	24.439	1.19925
s-cd47-CD47-1	NCGC00015609-05	Lonidamine	HK1	4	0.0332	87.905	-7.4792	s-cd47-WT_JUR-1	NCGC00015609-05	-1.4	1.177	114.136	-5.9292	-1.55	-26.231	-1.89265
s-cd47-CD47-1	NCGC00346824-01	3-Bromopyruvate	HK2	4	33.1734	96.091	-4.4792	s-cd47-WT_JUR-1	NCGC00346824-01	4	23.485	128.693	-4.6292	0.15	-32.602	-2.28141
s-cd47-CD47-1	NCGC00164566-02	Pitavastatin calcium	HMGCR	-2.2	11.7704	44.53	-4.9292	s-cd47-WT_JUR-1	NCGC00164566-02	-2.2	9.3495	51.259	-5.0292	0.1	-6.729	-0.702634
s-cd47-CD47-1	NCGC00164604-03	Fluvastatin	HMGCR	-2.4	10.4904	47.093	-4.9792	s-cd47-WT_JUR-1	NCGC00164604-03	-2.2	7.4266	52.103	-5.1292	0.15	-5.01	-0.59774
s-cd47-CD47-1	NCGC00188962-02	Pravastatin sodium	HMGCR	4	0.001	114.465	-8.9792	s-cd47-WT_JUR-1	NCGC00188962-02	4		116.446		-8.9792	-1.981	-0.41291
s-cd47-CD47-1	NCGC00017324-08	Simvastatin	HMGCR	-2.4	16.6261	35.41	-4.7792	s-cd47-WT_JUR-1	NCGC00017324-08	-2.1	16.6261	29.931	-4.7792	0	5.479	0.0423022
s-cd47-CD47-1	NCGC00023509-14	Lovastatin	HMGCR	-2.2	11.7704	58.652	-4.9292	s-cd47-WT_JUR-1	NCGC00023509-14	-2.2	20.931	50.986	-4.6792	-0.25	7.666	0.175754
s-cd47-CD47-1	NCGC00160531-01	Atorvastatin calcium	HMGCR	-2.2	20.931	57.007	-4.6792	s-cd47-WT_JUR-1	NCGC00160531-01	-2.2	20.931	34.989	-4.6792	0	22.018	1.05152
s-cd47-CD47-1	NCGC00185778-02	Nitisinone	HPD	4		115.814		s-cd47-WT_JUR-1	NCGC00185778-02	4	26.3506	96.537	-4.5792	4.5792	19.277	0.884261
s-cd47-CD47-1	NCGC00037850-05	NCGC00037850	HPGD	4		109.914		s-cd47-WT_JUR-1	NCGC00037850-05	4	13.2066	98.779	-4.8792	4.8792	11.135	0.387433
s-cd47-CD47-1	NCGC00094717-05	6-mercaptopurine	HPRT1	-1.1	1.6626	7.215	-5.7792	s-cd47-WT_JUR-1	NCGC00094717-05	-1.1	0.5258	9.439	-6.2792	0.5	-2.224	-0.427738
s-cd47-CD47-1	NCGC00016672-04	Halopyramine	HRH1	4	26.3506	63.366	-4.5792	s-cd47-WT_JUR-1	NCGC00016672-04	4	33.1734	82.476	-4.4792	-0.1	-19.11	-1.45813
s-cd47-CD47-1	NCGC00016710-04	Clemastine fumarate	HRH1	-2.4	11.7704	68.538	-4.9292	s-cd47-WT_JUR-1	NCGC00016710-04	4	37.2212	85.879	-4.4292	-0.5	-17.341	-1.35018
s-cd47-CD47-1	NCGC00015252-13	Cyproheptadine hydrochloride	HRH1	-2.2	20.931	29.611	-4.6792	s-cd47-WT_JUR-1	NCGC00015252-13	-2.2	18.6548	44.833	-4.7292	0.05	-15.222	-1.22088
s-cd47-CD47-1	NCGC00015513-09	Histamine dihydrochloride	HRH1	4		97.211		s-cd47-WT_JUR-1	NCGC00015513-09	4		112.189		0	-14.978	-1.20599
s-cd47-CD47-1	NCGC00015335-11	Diphenhydramine	HRH1	4		95.418		s-cd47-WT_JUR-1	NCGC00015335-11	4	5.2576	109.339	-5.2792	5.2792	-13.921	-1.14149
s-cd47-CD47-1	NCGC00016364-03	Chlorphenamine maleate	HRH1	2.4	9.3495	97.215	-5.0292	s-cd47-WT_JUR-1	NCGC00016364-03	1.2	0.0047	107.39	-8.3292	3.3	-10.175	-0.91291
s-cd47-CD47-1	NCGC00015580-08	Ketotifen	HRH1	-3	33.1734	10.412	-4.4792	s-cd47-WT_JUR-1	NCGC00015580-08	-3	29.5659	9.99	-4.5292	0.05	0.422	-0.266278
s-cd47-CD47-1	NCGC00177979-03	Azelastine hydrochloride	HRH1	-1.1	6.619	5.944	-5.1792	s-cd47-WT_JUR-1	NCGC00177979-03	-1.1	4.1763	5.059	-5.3792	0.2	0.885	-0.238025
s-cd47-CD47-1	NCGC00015619-09	Loratadine	HRH1	-2.1	23.485	8.205	-4.6292	s-cd47-WT_JUR-1	NCGC00015619-09	-2.1	23.485	4.761	-4.6292	0	3.444	-0.0818742
s-cd47-CD47-1	NCGC00167781-07	Cetirizine hydrochloride	HRH1	4		115.191		s-cd47-WT_JUR-1	NCGC00167781-07	4	37.2212	98.37	-4.4292	4.4292	16.821	0.734395
s-cd47-CD47-1	NCGC00181013-01	Mizolastine	HRH1	-1.4	0.001	89.324	-8.9792	s-cd47-WT_JUR-1	NCGC00181013-01	-2.2	20.931	60.168	-4.6792	-4.3	29.156	1.48708
s-cd47-CD47-1	NCGC00018276-03	Famotidine	HRH2	4	37.2212	88.502	-4.4292	s-cd47-WT_JUR-1	NCGC00018276-03	4	23.485	84.618	-4.6292	0.2	3.884	-0.0550252
s-cd47-CD47-1	NCGC00164550-01	Lafutidine	HRH2	4		102.962		s-cd47-WT_JUR-1	NCGC00164550-01	4		92.132		0	10.83	0.368822
s-cd47-CD47-1	NCGC00346633-01	SNX-2112	HSP90AB1	-1.2	0.0935	27.019	-7.0292	s-cd47-WT_JUR-1	NCGC00346633-01	-1.2	0.0833	44.192	-7.0792	0.05	-17.173	-1.33993
s-cd47-CD47-1	NCGC00346685-01	KW-2478	HSP90AB1	-1.2	1.3207	41.62	-5.8792	s-cd47-WT_JUR-1	NCGC00346685-01	-1.2	0.8333	56.004	-6.0792	0.2	-14.384	-1.16975
s-cd47-CD47-1	NCGC00346674-01	AT-13387AU	HSP90AB1	-1.1	0.2635	42.558	-6.5792	s-cd47-WT_JUR-1	NCGC00346674-01	-1.2	0.1663	47.722	-6.7792	0.2	-5.164	-0.607137
s-cd47-CD47-1	NCGC00346640-01	SNX-5422	HSP90AB1	-1.2	0.1663	37.619	-6.7792	s-cd47-WT_JUR-1	NCGC00346640-01	-1.2	0.1482	42.339	-6.8292	0.05	-4.72	-0.580044
s-cd47-CD47-1	NCGC00346643-01	Geldanamycin	HSP90AB1	-1.1	1.4818	-0.085	-5.8292	s-cd47-WT_JUR-1	NCGC00346643-01	-1.1	0.7427	1.086	-6.1292	0.3	-1.171	-0.363483
s-cd47-CD47-1	NCGC00242478-02	Alvespimycin hydrochloride	HSP90AB1	-1.1	0.6619	1.153	-6.1792	s-cd47-WT_JUR-1	NCGC00242478-02	-1.1	0.1663	2.232	-6.7792	0.6	-1.079	-0.357869
s-cd47-CD47-1	NCGC00178913-04	Tripterin	HSP90AB1	-1.1	0.7427	4.246	-6.1292	s-cd47-WT_JUR-1	NCGC00178913-04	-1.1	0.7427	4.996	-6.1292	0	-0.75	-0.337794
s-cd47-CD47-1	NCGC00346678-01	Ganetespib	HSP90AB1	-1.2	0.0526	45.545	-7.2792	s-cd47-WT_JUR-1	NCGC00346678-01	-1.1	0.0372	45.595	-7.4292	0.15	-0.05	-0.295079
s-cd47-CD47-1	NCGC00346438-01	Retaspimycin	HSP90AB1	-2.1	5.8992	3.822	-5.2292	s-cd47-WT_JUR-1	NCGC00346438-01	-2.1	3.7221	2.535	-5.4292	0.2	1.287	-0.213495
s-cd47-CD47-1	NCGC00247879-01	VER-82576	HSP90AB1	-1.2	1.3207	42.905	-5.8792	s-cd47-WT_JUR-1	NCGC00247879-01	-1.1	2.0931	39.492	-5.6792	-0.2	3.413	-0.0837658
s-cd47-CD47-1	NCGC00163424-03	Tanespimycin	HSP90AB1	-1.1	1.4818	21.702	-5.8292	s-cd47-WT_JUR-1	NCGC00163424-03	-1.1	1.4818	17.923	-5.8292	0	3.779	-0.0614324
s-cd47-CD47-1	NCGC00247877-01	CNF-2024	HSP90AB1	-1.2	0.1482	48.327	-6.8292	s-cd47-WT_JUR-1	NCGC00247877-01	-1.2	0.1321	43.514	-6.8792	0.05	4.813	0.00166268
s-cd47-CD47-1	NCGC00247878-01	NVP-AUY922	HSP90AB1	-1.4	0.0833	44.509	-7.0792	s-cd47-WT_JUR-1	NCGC00247878-01	-1.4	0.0833	35.397	-7.0792	0	9.112	0.263989
s-cd47-CD47-1	NCGC00161630-02	Novobiocin sodium	HSP90AB1	4	4.1763	122.231	-5.3792	s-cd47-WT_JUR-1	NCGC00161630-02	4	9.3495	113.097	-5.0292	-0.35	9.134	0.265332
s-cd47-CD47-1	NCGC00161410-02	CCT-018159	HSP90AB1	-1.2	8.3328	36.506	-5.0792	s-cd47-WT_JUR-1	NCGC00161410-02	-1.2	5.8992	24.511	-5.2292	0.15	11.995	0.439911
s-cd47-CD47-1	NCGC00263143-01	VER-155008	HSPA2	-1.2	3.3173	44.542	-5.4792	s-cd47-WT_JUR-1	NCGC00263143-01	-2.1	14.818	26.904	-4.8292	-0.65	17.638	0.784249
s-cd47-CD47-1	NCGC00263280-01	Ac-SAH-p53-8	HSPA2	-2.2	23.485	37.723	-4.6292	s-cd47-WT_JUR-1	NCGC00263280-01	-2.1	26.3506	11.534	-4.5792	-0.05	26.189	1.30603
s-cd47-CD47-1	NCGC00095109-06	Venlafaxine hydrochloride	HTR1A	-3	23.485	62.485	-4.6292	s-cd47-WT_JUR-1	NCGC00095109-06	4	0.4686	96.47	-6.3292	1.7	-33.985	-2.36581
s-cd47-CD47-1	NCGC00016092-03	WAY-100635	HTR1A	-3	37.2212	66.879	-4.4292	s-cd47-WT_JUR-1	NCGC00016092-03	-2.4	37.2212	76.202	-4.4292	0	-9.323	-0.860921
s-cd47-CD47-1	NCGC00025355-11	Paroxetine	HTR1A	-2.4	23.485	78.829	-4.6292	s-cd47-WT_JUR-1	NCGC00025355-11	-3	37.2212	78.485	-4.4292	-0.2	0.344	-0.271037
s-cd47-CD47-1	NCGC00015267-09	Citalopram hydrobromide	HTR1A	4	3.7221	89.823	-5.4292	s-cd47-WT_JUR-1	NCGC00015267-09	4	3.7221	86.68	-5.4292	0	3.143	-0.100241
s-cd47-CD47-1	NCGC00092357-04	Sibutramine hydrochloride	HTR1A	4	0.001	108.858	-8.9792	s-cd47-WT_JUR-1	NCGC00092357-04	4	20.931	102.991	-4.6792	-4.3	5.867	0.0659781
s-cd47-CD47-1	NCGC00015917-07	SB-206553	HTR1A	-2.2	13.2066	69.7	-4.8792	s-cd47-WT_JUR-1	NCGC00015917-07	-2.2	16.6261	58.55	-4.7792	-0.1	11.15	0.388349
s-cd47-CD47-1	NCGC00018193-06	Fluvoxamine maleate	HTR1A	-2.2	23.485	34.845	-4.6292	s-cd47-WT_JUR-1	NCGC00018193-06	-2.1	26.3506	0.209	-4.5792	-0.05	34.636	1.82147
s-cd47-CD47-1	NCGC00095135-04	Almotriptan	HTR1B	4	37.2212	92.271	-4.4292	s-cd47-WT_JUR-1	NCGC00095135-04	4		94.884		-4.4292	-2.613	-0.451475
s-cd47-CD47-1	NCGC00095838-03	Sumatriptan succinate	HTR1B	4	0.3722	94.721	-6.4292	s-cd47-WT_JUR-1	NCGC00095838-03	-2.4	14.818	92.808	-4.8292	-1.6	1.913	-0.175296
s-cd47-CD47-1	NCGC00181786-03	Naratriptan hydrochloride	HTR1B	-1.1	1.049	22.742	-5.9792	s-cd47-WT_JUR-1	NCGC00181786-03	-1.1	1.4818	14.414	-5.8292	-0.15	8.328	0.216149
s-cd47-CD47-1	NCGC00263884-03	Zolmitriptan	HTR1B	4		107.528		s-cd47-WT_JUR-1	NCGC00263884-03	4	0.0743	97.623	-7.1292	7.1292	9.905	0.312378
s-cd47-CD47-1	NCGC00015918-05	SB-224289	HTR1B	4		106.792		s-cd47-WT_JUR-1	NCGC00015918-05	4	20.931	91.93	-4.6792	4.6792	14.862	0.614856
s-cd47-CD47-1	NCGC00095899-04	Rizatriptan benzoate	HTR1B	4	11.7704	83.76	-4.9292	s-cd47-WT_JUR-1	NCGC00095899-04	-2.2	13.2066	62.211	-4.8792	-0.05	21.549	1.0229
s-cd47-CD47-1	NCGC00015601-03	LY310762	HTR1D	4	37.2212	91.659	-4.4292	s-cd47-WT_JUR-1	NCGC00015601-03	4	23.485	92.657	-4.6292	0.2	-0.998	-0.352927
s-cd47-CD47-1	NCGC00015173-02	BRL-15572	HTR1D	-3	33.1734	21.868	-4.4792	s-cd47-WT_JUR-1	NCGC00015173-02	-3	33.1734	18.41	-4.4792	0	3.458	-0.0810199
s-cd47-CD47-1	NCGC00021146-06	Ketanserin	HTR2A	-1.4	0.0019	112.488	-8.7292	s-cd47-WT_JUR-1	NCGC00021146-06	4		120.685		-8.7292	-8.197	-0.792212
s-cd47-CD47-1	NCGC00013841-08	Cyclobenzaprine hydrochloride	HTR2A	4	33.1734	102.491	-4.4792	s-cd47-WT_JUR-1	NCGC00013841-08	4	0.0166	103.833	-7.7792	3.3	-1.342	-0.373918
s-cd47-CD47-1	NCGC00159510-04	Aripiprazole	HTR2A	-3	33.1734	86.081	-4.4792	s-cd47-WT_JUR-1	NCGC00159510-04	-3	33.1734	77.847	-4.4792	0	8.234	0.210413
s-cd47-CD47-1	NCGC00025346-01	Mirtazapine	HTR2A	4		117.485		s-cd47-WT_JUR-1	NCGC00025346-01	4		108.496		0	8.989	0.256484
s-cd47-CD47-1	NCGC00015656-06	Mianserin hydrochloride	HTR2A	-3	29.5659	38.292	-4.5292	s-cd47-WT_JUR-1	NCGC00015656-06	-3	33.1734	27.117	-4.4792	-0.05	11.175	0.389874
s-cd47-CD47-1	NCGC00263539-03	Ziprasidone hydrochloride	HTR2A	-3	23.485	42.21	-4.6292	s-cd47-WT_JUR-1	NCGC00263539-03	-3	26.3506	17.586	-4.5792	-0.05	24.624	1.21054
s-cd47-CD47-1	NCGC00015004-11	Amoxapine	HTR2A	-3	23.485	60.648	-4.6292	s-cd47-WT_JUR-1	NCGC00015004-11	-3	37.2212	28.037	-4.4292	-0.2	32.611	1.69791
s-cd47-CD47-1	NCGC00253646-01	Agomelatine	HTR2C	4	0.0469	111.69	-7.3292	s-cd47-WT_JUR-1	NCGC00253646-01	4		106.129		-7.3292	5.561	0.0473059
s-cd47-CD47-1	NCGC00161414-02	Tropisetron	HTR3A	4	29.5659	101.322	-4.5292	s-cd47-WT_JUR-1	NCGC00161414-02	4		122.719		-4.5292	-21.397	-1.59768
s-cd47-CD47-1	NCGC00183873-01	Granisetron hydrochloride	HTR3A	4		107.849		s-cd47-WT_JUR-1	NCGC00183873-01	4		108.781		0	-0.932	-0.348899
s-cd47-CD47-1	NCGC00179341-02	Ondansetron hydrochloride	HTR3A	4		111.372		s-cd47-WT_JUR-1	NCGC00179341-02	4	37.2212	101.887	-4.4292	4.4292	9.485	0.28675
s-cd47-CD47-1	NCGC00024563-02	Azasetron hydrochloride	HTR3A	4	0.001	117.904	-8.9792	s-cd47-WT_JUR-1	NCGC00024563-02	4		104.092		-8.9792	13.812	0.550785
s-cd47-CD47-1	NCGC00160527-05	Mosapride citrate	HTR4	4		107.262		s-cd47-WT_JUR-1	NCGC00160527-05	4		117.128		0	-9.866	-0.894055
s-cd47-CD47-1	NCGC00253867-01	Prucalopride	HTR4	-3	29.5659	30.857	-4.5292	s-cd47-WT_JUR-1	NCGC00253867-01	-3	26.3506	31.378	-4.5792	0.05	-0.521	-0.32382
s-cd47-CD47-1	NCGC00250378-01	Piboserod hydrochloride	HTR4	-2.1	10.4904	18.942	-4.9792	s-cd47-WT_JUR-1	NCGC00250378-01	-2.1	11.7704	11.836	-4.9292	-0.05	7.106	0.141582
s-cd47-CD47-1	NCGC00095192-06	Tegaserod maleate	HTR4	-1.2	4.1763	37.93	-5.3792	s-cd47-WT_JUR-1	NCGC00095192-06	-1.2	3.3173	23.417	-5.4792	0.1	14.513	0.59356
s-cd47-CD47-1	NCGC00246971-03	Polydatin	ICAM1	4	37.2212	88.556	-4.4292	s-cd47-WT_JUR-1	NCGC00246971-03	4	0.0037	115.652	-8.4292	4	-27.096	-1.94544
s-cd47-CD47-1	NCGC00015840-09	Phloretin	ICAM1	4	5.8992	84.602	-5.2292	s-cd47-WT_JUR-1	NCGC00015840-09	4	0.3317	95.735	-6.4792	1.25	-11.133	-0.971368
s-cd47-CD47-1	NCGC00347946-01	IDH-C227	IDH1	4		110.724		s-cd47-WT_JUR-1	NCGC00347946-01	4		108.901		0	1.823	-0.180788
s-cd47-CD47-1	NCGC00263234-01	IDH-001	IDH1	-2.1	26.3506	6.247	-4.5792	s-cd47-WT_JUR-1	NCGC00263234-01	-2.1	23.485	3.664	-4.6292	0.05	2.583	-0.134413
s-cd47-CD47-1	NCGC00262689-01	NCGC00262689	IDH1	-2.4	14.818	83.119	-4.8292	s-cd47-WT_JUR-1	NCGC00262689-01	-3	29.5659	79.487	-4.5292	-0.3	3.632	-0.0704024
s-cd47-CD47-1	NCGC00263222-01	CAY10581	IDO1	-1.1	3.7221	3.845	-5.4292	s-cd47-WT_JUR-1	NCGC00263222-01	-1.1	2.3485	3.885	-5.6292	0.2	-0.04	-0.294469
s-cd47-CD47-1	NCGC00346842-01	Indoximod	IDO1	4		118.921		s-cd47-WT_JUR-1	NCGC00346842-01	4		97.655		0	21.266	1.00563
s-cd47-CD47-1	NCGC00253439-01	GSK-1904529A	IGFR1	-2.1	20.931	20.335	-4.6792	s-cd47-WT_JUR-1	NCGC00253439-01	-2.2	14.818	44.869	-4.8292	0.15	-24.534	-1.7891
s-cd47-CD47-1	NCGC00346647-01	GSK-1838705A	IGFR1	-2.1	11.7704	-0.241	-4.9292	s-cd47-WT_JUR-1	NCGC00346647-01	-1.1	7.4266	1.245	-5.1292	0.2	-1.486	-0.382705
s-cd47-CD47-1	NCGC00346485-01	ADW-742	IGFR1	-2.1	23.485	-0.745	-4.6292	s-cd47-WT_JUR-1	NCGC00346485-01	-2.1	23.485	-0.149	-4.6292	0	-0.596	-0.328396
s-cd47-CD47-1	NCGC00346461-01	NVP-AEW541	IGFR1	4	5.8992	97.526	-5.2292	s-cd47-WT_JUR-1	NCGC00346461-01	-2.4	37.2212	90.155	-4.4292	-0.8	7.371	0.157753
s-cd47-CD47-1	NCGC00250375-02	Linsitinib	IGFR1	-2.2	16.6261	18.548	-4.7792	s-cd47-WT_JUR-1	NCGC00250375-02	-2.1	16.6261	9.882	-4.7792	0	8.666	0.236774
s-cd47-CD47-1	NCGC00161923-04	Picropodophyllin	IGFR1	-1.2	0.1049	24.729	-6.9792	s-cd47-WT_JUR-1	NCGC00161923-04	-1.1	0.0469	12.308	-7.3292	0.35	12.421	0.465906
s-cd47-CD47-1	NCGC00346460-02	BMS-536924	IGFR1	-2.1	16.6261	15.48	-4.7792	s-cd47-WT_JUR-1	NCGC00346460-02	-3	26.3506	1.454	-4.5792	-0.2	14.026	0.563843
s-cd47-CD47-1	NCGC00022001-14	Picropodophyllin	IGFR1	4		37.377		s-cd47-WT_JUR-1	NCGC00022001-14	4	0.0066	12.497	-8.1792	8.1792	24.88	1.22616
s-cd47-CD47-1	NCGC00346453-01	BMS-754807	IGFR1	4	14.818	82.867	-4.8292	s-cd47-WT_JUR-1	NCGC00346453-01	-2.2	7.4266	47.422	-5.1292	0.3	35.445	1.87084
s-cd47-CD47-1	NCGC00345782-01	GMX-1778	IKBKB	-1.1	0.0019	4.234	-8.7292	s-cd47-WT_JUR-1	NCGC00345782-01	-1.1	0.0033	7.861	-8.4792	-0.25	-3.627	-0.513349
s-cd47-CD47-1	NCGC00167767-03	IKK16	IKBKB	-1.1	6.619	0.618	-5.1792	s-cd47-WT_JUR-1	NCGC00167767-03	-1.1	8.3328	1.799	-5.0792	-0.1	-1.181	-0.364093
s-cd47-CD47-1	NCGC00250384-01	PHA-408	IKBKB	-2.1	20.931	0.654	-4.6792	s-cd47-WT_JUR-1	NCGC00250384-01	-2.1	23.485	1.317	-4.6292	-0.05	-0.663	-0.332485
s-cd47-CD47-1	NCGC00165811-03	IMD-0354	IKBKB	-1.1	1.049	0.051	-5.9792	s-cd47-WT_JUR-1	NCGC00165811-03	-1.1	0.4176	0.556	-6.3792	0.4	-0.505	-0.322844
s-cd47-CD47-1	NCGC00263021-02	MLN-120B	IKBKB	-1.2	11.7704	69.37	-4.9292	s-cd47-WT_JUR-1	NCGC00263021-02	-2.2	13.2066	69.417	-4.8792	-0.05	-0.047	-0.294896
s-cd47-CD47-1	NCGC00242056-02	IKK-3 Inhibitor IX	IKBKB	4		96.632		s-cd47-WT_JUR-1	NCGC00242056-02	4	10.4904	94.703	-4.9792	4.9792	1.929	-0.17432
s-cd47-CD47-1	NCGC00347280-01	IKK-2 Inhibitor VIII	IKBKB	-3	33.1734	45.069	-4.4792	s-cd47-WT_JUR-1	NCGC00347280-01	-2.2	23.485	37.88	-4.6292	0.15	7.189	0.146647
s-cd47-CD47-1	NCGC00167773-03	TPCA-1	IKBKB	-1.1	1.4818	31.06	-5.8292	s-cd47-WT_JUR-1	NCGC00167773-03	-1.1	2.3485	18.961	-5.6292	-0.2	12.099	0.446257
s-cd47-CD47-1	NCGC00165761-02	BMS-345541	IKBKB	-2.1	14.818	23.272	-4.8292	s-cd47-WT_JUR-1	NCGC00165761-02	-2.1	16.6261	1.923	-4.7792	-0.05	21.349	1.0107
s-cd47-CD47-1	NCGC00165873-02	PS-1145	IKBKB	-3	37.2212	97.256	-4.4292	s-cd47-WT_JUR-1	NCGC00165873-02	-3	37.2212	67.733	-4.4292	0	29.523	1.50948
s-cd47-CD47-1	NCGC00263213-01	PF-184	IKBKB	-1.2	4.1763	51.177	-5.3792	s-cd47-WT_JUR-1	NCGC00263213-01	-1.1	6.619	15.645	-5.1792	-0.2	35.532	1.87615
s-cd47-CD47-1	NCGC00250386-02	BX-795	IKBKE	-2.1	18.6548	4.184	-4.7292	s-cd47-WT_JUR-1	NCGC00250386-02	-2.1	18.6548	8.813	-4.7292	0	-4.629	-0.574492
s-cd47-CD47-1	NCGC00263093-01	Apilimod	IL2	-2.1	20.931	14.295	-4.6792	s-cd47-WT_JUR-1	NCGC00263093-01	-2.1	16.6261	12.53	-4.7792	0.1	1.765	-0.184327
s-cd47-CD47-1	NCGC00345803-01	AVN-944	IMPDH1	-2.1	8.3328	34.737	-5.0792	s-cd47-WT_JUR-1	NCGC00345803-01	-1.1	0.3722	29.318	-6.4292	1.35	5.419	0.038641
s-cd47-CD47-1	NCGC00094087-06	Mizoribine	IMPDH1	4		123.778		s-cd47-WT_JUR-1	NCGC00094087-06	4	0.8333	112.817	-6.0792	6.0792	10.961	0.376816
s-cd47-CD47-1	NCGC00090726-11	Ribavirin	IMPDH1	4	0.001	113.259	-8.9792	s-cd47-WT_JUR-1	NCGC00090726-11	-3	37.2212	82.278	-4.4292	-4.55	30.981	1.59844
s-cd47-CD47-1	NCGC00016786-14	Mycophenolic acid	IMPDH1	-1.2	2.3485	58.678	-5.6292	s-cd47-WT_JUR-1	NCGC00016786-14	-1.1	1.049	19.34	-5.9792	0.35	39.338	2.10839
s-cd47-CD47-1	NCGC00159459-02	Mycophenolate mofetil	IMPDH1	-1.2	2.6351	71.329	-5.5792	s-cd47-WT_JUR-1	NCGC00159459-02	-1.1	1.4818	19.156	-5.8292	0.25	52.173	2.89159
s-cd47-CD47-1	NCGC00024728-01	L-690330	INPPL1	4	20.931	79.751	-4.6792	s-cd47-WT_JUR-1	NCGC00024728-01	4	18.6548	90.53	-4.7292	0.05	-10.779	-0.949767
s-cd47-CD47-1	NCGC00346882-01	AS-1949490	INPPL1	-2.2	20.931	28.627	-4.6792	s-cd47-WT_JUR-1	NCGC00346882-01	-2.2	23.485	25.864	-4.6292	-0.05	2.763	-0.123429
s-cd47-CD47-1	NCGC00241411-01	NCGC00241411-01	IRAK1	-3	20.931	59.908	-4.6792	s-cd47-WT_JUR-1	NCGC00241411-01	4	10.4904	83.577	-4.9792	0.3	-23.669	-1.73632
s-cd47-CD47-1	NCGC00186035-04	NCGC00186035-01	IRAK1	-2.2	11.7704	32.692	-4.9292	s-cd47-WT_JUR-1	NCGC00186035-04	-2.3	16.6261	11.657	-4.7792	-0.15	21.035	0.991535
s-cd47-CD47-1	NCGC00241410-01	NCGC00241410-01	IRAK1	-2.1	10.4904	41.906	-4.9792	s-cd47-WT_JUR-1	NCGC00241410-01	-2.3	16.6261	11.766	-4.7792	-0.2	30.14	1.54713
s-cd47-CD47-1	NCGC00346941-01	ITK inhibitor	ITK	-2.1	23.485	0.754	-4.6292	s-cd47-WT_JUR-1	NCGC00346941-01	-2.1	23.485	1.854	-4.6292	0	-1.1	-0.359151
s-cd47-CD47-1	NCGC00188382-04	NCGC00188382-01	ITK	-2.1	1.177	-0.029	-5.9292	s-cd47-WT_JUR-1	NCGC00188382-04	-1.1	1.3207	1.045	-5.8792	-0.05	-1.074	-0.357564
s-cd47-CD47-1	NCGC00229512-04	NCGC00229512-01	ITK	-2.1	20.931	0.348	-4.6792	s-cd47-WT_JUR-1	NCGC00229512-04	-2.1	14.818	0.679	-4.8292	0.15	-0.331	-0.312226
s-cd47-CD47-1	NCGC00344999-01	NCGC00344999-01	ITK	-1.1	2.6351	0.829	-5.5792	s-cd47-WT_JUR-1	NCGC00344999-01	-1.3	0.1321	0.648	-6.8792	1.3	0.181	-0.280984
s-cd47-CD47-1	NCGC00344990-01	NCGC00344990-01	ITK	-1.1	3.7221	16.065	-5.4292	s-cd47-WT_JUR-1	NCGC00344990-01	-1.1	4.6859	0.956	-5.3292	-0.1	15.109	0.629928
s-cd47-CD47-1	NCGC00242486-02	AZD-1480	JAK1	-3	33.1734	47.583	-4.4792	s-cd47-WT_JUR-1	NCGC00242486-02	-2.4	18.6548	61.65	-4.7292	0.25	-14.067	-1.1504
s-cd47-CD47-1	NCGC00229511-01	Tofacitinib	JAK1	4		103.078		s-cd47-WT_JUR-1	NCGC00229511-01	4	5.8992	109.913	-5.2292	5.2292	-6.835	-0.709102
s-cd47-CD47-1	NCGC00015610-18	Leflunomide	JAK1	-2.2	10.4904	63.373	-4.9792	s-cd47-WT_JUR-1	NCGC00015610-18	-2.4	14.818	66.321	-4.8292	-0.15	-2.948	-0.471916
s-cd47-CD47-1	NCGC00345855-01	GPLG-0634	JAK1	-2.1	16.6261	29.048	-4.7792	s-cd47-WT_JUR-1	NCGC00345855-01	-2.1	16.6261	30.92	-4.7792	0	-1.872	-0.406258
s-cd47-CD47-1	NCGC00244256-02	Lestaurtinib	JAK1	-2.1	1.4818	8.998	-5.8292	s-cd47-WT_JUR-1	NCGC00244256-02	-1.1	2.0931	3.612	-5.6792	-0.15	5.386	0.0366273
s-cd47-CD47-1	NCGC00244253-01	Ruxolitinib	JAK1	-3	37.2212	72.471	-4.4292	s-cd47-WT_JUR-1	NCGC00244253-01	-3	26.3506	60.564	-4.5792	0.15	11.907	0.434541
s-cd47-CD47-1	NCGC00244257-01	CYT387	JAK1	-2.1	11.7704	26.332	-4.9292	s-cd47-WT_JUR-1	NCGC00244257-01	-2.3	13.2066	5.624	-4.8792	-0.05	20.708	0.971581
s-cd47-CD47-1	NCGC00345828-01	Merck 5	JAK1	-1.2	1.177	71.573	-5.9292	s-cd47-WT_JUR-1	NCGC00345828-01	-1.2	2.9566	49.62	-5.5292	-0.4	21.953	1.04755
s-cd47-CD47-1	NCGC00345798-01	BMS-911543	JAK2	-3	26.3506	57.398	-4.5792	s-cd47-WT_JUR-1	NCGC00345798-01	-3	26.3506	69.01	-4.5792	0	-11.612	-1.0006
s-cd47-CD47-1	NCGC00345845-01	TG-89	JAK2	-2.1	16.6261	13.645	-4.7792	s-cd47-WT_JUR-1	NCGC00345845-01	-2.1	14.818	18.559	-4.8292	0.05	-4.914	-0.591882
s-cd47-CD47-1	NCGC00345854-01	CEP-33779	JAK2	-2.2	14.818	45.307	-4.8292	s-cd47-WT_JUR-1	NCGC00345854-01	-1.2	7.4266	49.681	-5.1292	0.3	-4.374	-0.558931
s-cd47-CD47-1	NCGC00014911-01	Cucurbitacin I	JAK2	-1.1	0.3722	0.14	-6.4292	s-cd47-WT_JUR-1	NCGC00014911-01	-1.1	0.1663	1.465	-6.7792	0.35	-1.325	-0.37288
s-cd47-CD47-1	NCGC00249346-02	SB1518	JAK2	-1.1	5.8992	0.915	-5.2292	s-cd47-WT_JUR-1	NCGC00249346-02	-1.1	7.4266	2.16	-5.1292	-0.1	-1.245	-0.367999
s-cd47-CD47-1	NCGC00263202-01	NVP-BSK805	JAK2	-2.1	16.6261	3.655	-4.7792	s-cd47-WT_JUR-1	NCGC00263202-01	-2.3	18.6548	4.806	-4.7292	-0.05	-1.151	-0.362263
s-cd47-CD47-1	NCGC00263102-01	Degrasyn	JAK2	-1.1	7.4266	2.474	-5.1292	s-cd47-WT_JUR-1	NCGC00263102-01	-1.1	3.3173	3.029	-5.4792	0.35	-0.555	-0.325895
s-cd47-CD47-1	NCGC00262608-02	TG-101209	JAK2	-2.1	16.6261	0.452	-4.7792	s-cd47-WT_JUR-1	NCGC00262608-02	-2.1	16.6261	0.794	-4.7792	0	-0.342	-0.312897
s-cd47-CD47-1	NCGC00345846-01	TG-46	JAK2	-2.1	14.818	2.472	-4.8292	s-cd47-WT_JUR-1	NCGC00345846-01	-2.1	5.2576	1.544	-5.2792	0.45	0.928	-0.235401
s-cd47-CD47-1	NCGC00346581-01	AZ-960	JAK2	-2.1	14.818	26.954	-4.8292	s-cd47-WT_JUR-1	NCGC00346581-01	-1.1	0.8333	25.874	-6.0792	1.25	1.08	-0.226126
s-cd47-CD47-1	NCGC00345839-01	Baricitinib	JAK2	1.2	0.003	70.037	-8.5292	s-cd47-WT_JUR-1	NCGC00345839-01	-1.4	0.935	63.763	-6.0292	-2.5	6.274	0.0908134
s-cd47-CD47-1	NCGC00244252-01	TG-101348	JAK2	4	0.0469	108.99	-7.3292	s-cd47-WT_JUR-1	NCGC00244252-01	4	0.001	98.564	-8.9792	1.65	10.426	0.34417
s-cd47-CD47-1	NCGC00345461-02	Gandotinib	JAK2	-2.1	20.931	18.832	-4.6792	s-cd47-WT_JUR-1	NCGC00345461-02	-2.1	13.2066	5.436	-4.8792	0.2	13.396	0.5254
s-cd47-CD47-1	NCGC00016014-08	Tyrphostin B42	JAK2	-2.2	14.818	67.867	-4.8292	s-cd47-WT_JUR-1	NCGC00016014-08	-2.1	16.6261	35.116	-4.7792	-0.05	32.751	1.70645
s-cd47-CD47-1	NCGC00241036-02	NCGC00241036-01	JARID2	-2.2	14.818	73.954	-4.8292	s-cd47-WT_JUR-1	NCGC00241036-02	-2.2	18.6548	46.14	-4.7292	-0.1	27.814	1.40519
s-cd47-CD47-1	NCGC00183808-06	NCGC00183808-01	JARID2	-3	23.485	74.518	-4.6292	s-cd47-WT_JUR-1	NCGC00183808-06	-2.1	16.6261	35.566	-4.7792	0.15	38.952	2.08484
s-cd47-CD47-1	NCGC00160217-02	Sophocarpine	KCNH2	-3	26.3506	83.612	-4.5792	s-cd47-WT_JUR-1	NCGC00160217-02	-3	23.485	40.909	-4.6292	0.05	42.703	2.31372
s-cd47-CD47-1	NCGC00346739-01	Retigabine	KCNQ1	4	20.931	89.571	-4.6792	s-cd47-WT_JUR-1	NCGC00346739-01	4	13.2066	96.821	-4.8792	0.2	-7.25	-0.734426
s-cd47-CD47-1	NCGC00015451-06	Flupirtine maleate	KCNQ1	-3	37.2212	69.164	-4.4292	s-cd47-WT_JUR-1	NCGC00015451-06	-3	37.2212	44.09	-4.4292	0	25.074	1.238
s-cd47-CD47-1	NCGC00250403-01	Linifanib	KDR	-3	33.1734	22.189	-4.4792	s-cd47-WT_JUR-1	NCGC00250403-01	-2.1	20.931	26.515	-4.6792	0.2	-4.326	-0.556002
s-cd47-CD47-1	NCGC00249392-01	Telatinib	KDR	-3	37.2212	50.881	-4.4292	s-cd47-WT_JUR-1	NCGC00249392-01	-2.2	20.931	52.449	-4.6792	0.25	-1.568	-0.387708
s-cd47-CD47-1	NCGC00263104-01	Foretinib	KDR	-2.1	14.818	0.563	-4.8292	s-cd47-WT_JUR-1	NCGC00263104-01	-2.1	16.6261	2.119	-4.7792	-0.05	-1.556	-0.386976
s-cd47-CD47-1	NCGC00263100-01	OSI-632	KDR	-2.1	23.485	1.97	-4.6292	s-cd47-WT_JUR-1	NCGC00263100-01	-3	33.1734	2.189	-4.4792	-0.15	-0.219	-0.305392
s-cd47-CD47-1	NCGC00263138-01	Regorafenib	KDR	-2.1	16.6261	3.872	-4.7792	s-cd47-WT_JUR-1	NCGC00263138-01	-2.1	14.818	2.837	-4.8292	0.05	1.035	-0.228872
s-cd47-CD47-1	NCGC00263160-01	Brivanib	KDR	-2.2	16.6261	38.157	-4.7792	s-cd47-WT_JUR-1	NCGC00263160-01	-2.1	16.6261	36.04	-4.7792	0	2.117	-0.162848
s-cd47-CD47-1	NCGC00263164-01	Cabozantinib	KDR	-2.1	23.485	10.621	-4.6292	s-cd47-WT_JUR-1	NCGC00263164-01	-2.1	14.818	3.644	-4.8292	0.2	6.977	0.133711
s-cd47-CD47-1	NCGC00263176-01	BMS-794833	KDR	-2.1	23.485	28.874	-4.6292	s-cd47-WT_JUR-1	NCGC00263176-01	-2.1	23.485	9.184	-4.6292	0	19.69	0.909463
s-cd47-CD47-1	NCGC00346571-01	SB-743921	KIF11	-2.2	18.6548	1.377	-4.7292	s-cd47-WT_JUR-1	NCGC00346571-01	-2.4	13.2066	3.219	-4.8792	0.15	-1.842	-0.404428
s-cd47-CD47-1	NCGC00263174-01	Ispinesib	KIF11	-2.4	58.9917	1.44	-4.2292	s-cd47-WT_JUR-1	NCGC00263174-01	-1.4	0.0019	2.353	-8.7292	4.5	-0.913	-0.34774
s-cd47-CD47-1	NCGC00346464-01	ARRY-520	KIF11	-3	37.2212	19.052	-4.4292	s-cd47-WT_JUR-1	NCGC00346464-01	4	7.4266	9.352	-5.1292	0.7	9.7	0.299869
s-cd47-CD47-1	NCGC00025103-01	Monastrol	KIF11	-1.2	0.4176	69.287	-6.3792	s-cd47-WT_JUR-1	NCGC00025103-01	-1.1	0.1865	32.433	-6.7292	0.35	36.854	1.95682
s-cd47-CD47-1	NCGC00159541-02	S-Trityl-L-cysteine	KIF11	-3	26.3506	80.305	-4.5792	s-cd47-WT_JUR-1	NCGC00159541-02	-2.1	23.485	33.811	-4.6292	0.05	46.494	2.54505
s-cd47-CD47-1	NCGC00242493-01	Quizartinib	KIT	-2.2	2.0931	27.806	-5.6792	s-cd47-WT_JUR-1	NCGC00242493-01	-2.2	4.6859	35.391	-5.3292	-0.35	-7.585	-0.754868
s-cd47-CD47-1	NCGC00241097-01	Tandutinib	KIT	-3	33.1734	-0.731	-4.4792	s-cd47-WT_JUR-1	NCGC00241097-01	-2.1	23.485	5.748	-4.6292	0.15	-6.479	-0.687379
s-cd47-CD47-1	NCGC00241103-04	Masitinib	KIT	-2.1	23.485	3.361	-4.6292	s-cd47-WT_JUR-1	NCGC00241103-04	-3	26.3506	8.258	-4.5792	-0.05	-4.897	-0.590845
s-cd47-CD47-1	NCGC00345843-01	AMG-25	KIT	-2.2	9.3495	51.231	-5.0292	s-cd47-WT_JUR-1	NCGC00345843-01	-2.2	5.8992	55.362	-5.2292	0.2	-4.131	-0.544103
s-cd47-CD47-1	NCGC00346895-01	Amastatin	LAP3	4	0.0935	99.114	-7.0292	s-cd47-WT_JUR-1	NCGC00346895-01	4	29.5659	82.963	-4.5292	-2.5	16.151	0.693512
s-cd47-CD47-1	NCGC00346955-01	A-770041	LCK	-1.1	3.7221	8.986	-5.4292	s-cd47-WT_JUR-1	NCGC00346955-01	-1.1	4.1763	19.387	-5.3792	-0.05	-10.401	-0.926701
s-cd47-CD47-1	NCGC00346958-01	HMSL10019	LCK	-1.1	4.1763	0.11	-5.3792	s-cd47-WT_JUR-1	NCGC00346958-01	-1.1	2.6351	1.861	-5.5792	0.2	-1.751	-0.398875
s-cd47-CD47-1	NCGC00263206-02	AMG-47a	LCK	-2.1	16.6261	6.886	-4.7792	s-cd47-WT_JUR-1	NCGC00263206-02	-2.1	16.6261	3.628	-4.7792	0	3.258	-0.093224
s-cd47-CD47-1	NCGC00346959-01	HMSL10038	LCK	-1.2	2.9566	31.115	-5.5292	s-cd47-WT_JUR-1	NCGC00346959-01	-1.1	2.3485	26.877	-5.6292	0.1	4.238	-0.033424
s-cd47-CD47-1	NCGC00346933-01	SU-6656	LCK	-2.2	9.3495	72.735	-5.0292	s-cd47-WT_JUR-1	NCGC00346933-01	-1.1	8.3328	39.636	-5.0792	0.05	33.099	1.72768
s-cd47-CD47-1	NCGC00263197-01	BMS-5	LIMK1	-2.2	20.931	23.361	-4.6792	s-cd47-WT_JUR-1	NCGC00263197-01	-2.3	18.6548	14.055	-4.7292	0.05	9.306	0.275827
s-cd47-CD47-1	NCGC00345825-01	BMS-3	LIMK1	-1.2	0.3722	23.865	-6.4292	s-cd47-WT_JUR-1	NCGC00345825-01	-1.1	0.2635	6.15	-6.5792	0.15	17.715	0.788947
s-cd47-CD47-1	NCGC00165816-02	KI-16425	LPAR1	4		85.507		s-cd47-WT_JUR-1	NCGC00165816-02	4	0.0094	90.871	-8.0292	8.0292	-5.364	-0.619342
s-cd47-CD47-1	NCGC00347944-01	Hg-10-102-01	LRRK2	4	0.001	115.75	-8.9792	s-cd47-WT_JUR-1	NCGC00347944-01	4		118.559		-8.9792	-2.809	-0.463435
s-cd47-CD47-1	NCGC00346807-01	LRRK2-IN-1	LRRK2	-2.2	14.818	28.194	-4.8292	s-cd47-WT_JUR-1	NCGC00346807-01	-2.1	14.818	13.936	-4.8292	0	14.258	0.578
s-cd47-CD47-1	NCGC00025323-01	Ubenimex	LTA4H	-2.1	26.3506	1.666	-4.5792	s-cd47-WT_JUR-1	NCGC00025323-01	-2.1	23.485	3.301	-4.6292	0.05	-1.635	-0.391797
s-cd47-CD47-1	NCGC00015848-04	Tranylcypromine	MAOA	-3	37.2212	73.769	-4.4292	s-cd47-WT_JUR-1	NCGC00015848-04	4	37.2212	110.326	-4.4292	0	-36.557	-2.52275
s-cd47-CD47-1	NCGC00094872-08	Piperine	MAOA	-3	23.485	79.119	-4.6292	s-cd47-WT_JUR-1	NCGC00094872-08	4	23.485	85.056	-4.6292	0	-5.937	-0.654306
s-cd47-CD47-1	NCGC00017269-06	Formononetin	MAOA	4		103.726		s-cd47-WT_JUR-1	NCGC00017269-06	4	11.7704	103.24	-4.9292	4.9292	0.486	-0.262372
s-cd47-CD47-1	NCGC00015830-07	Phenelzine	MAOA	-2.2	11.7704	51.795	-4.9292	s-cd47-WT_JUR-1	NCGC00015830-07	-2.1	14.818	13.556	-4.8292	-0.1	38.239	2.04133
s-cd47-CD47-1	NCGC00168774-01	Rasagiline mesilate	MAOB	4	33.1734	83.088	-4.4792	s-cd47-WT_JUR-1	NCGC00168774-01	4	13.2066	94.923	-4.8792	0.4	-11.835	-1.0142
s-cd47-CD47-1	NCGC00024994-01	Selegiline hydrochloride	MAOB	4	3.7221	91.719	-5.4292	s-cd47-WT_JUR-1	NCGC00024994-01	4		93.256		-5.4292	-1.537	-0.385817
s-cd47-CD47-1	NCGC00159483-03	Hydroxychloroquine sulfate	MAP1LC3A	4	37.2212	112.507	-4.4292	s-cd47-WT_JUR-1	NCGC00159483-03	4	1.177	88.656	-5.9292	1.5	23.851	1.16337
s-cd47-CD47-1	NCGC00015790-02	PD-098059	MAP2K1	-3	23.485	60.626	-4.6292	s-cd47-WT_JUR-1	NCGC00015790-02	4	23.485	82.865	-4.6292	0	-22.239	-1.64906
s-cd47-CD47-1	NCGC00346567-01	AZD-8330	MAP2K1	4		92.183		s-cd47-WT_JUR-1	NCGC00346567-01	4		104.623		0	-12.44	-1.05112
s-cd47-CD47-1	NCGC00345804-01	ARRY-162	MAP2K1	4	0.0187	95.515	-7.7292	s-cd47-WT_JUR-1	NCGC00345804-01	4	0.4686	105.582	-6.3292	-1.4	-10.067	-0.90632
s-cd47-CD47-1	NCGC00346552-01	PD-318088	MAP2K1	1.2	0.0019	84.283	-8.7292	s-cd47-WT_JUR-1	NCGC00346552-01	1.2	0.0017	92.297	-8.7792	0.05	-8.014	-0.781045
s-cd47-CD47-1	NCGC00188380-01	RDEA-119	MAP2K1	-3	26.3506	84.205	-4.5792	s-cd47-WT_JUR-1	NCGC00188380-01	4	37.2212	91.238	-4.4292	-0.15	-7.033	-0.721185
s-cd47-CD47-1	NCGC00189073-02	Selumetinib	MAP2K1	-1.2	9.3495	72.753	-5.0292	s-cd47-WT_JUR-1	NCGC00189073-02	4	3.7221	70.989	-5.4292	0.4	1.764	-0.184388
s-cd47-CD47-1	NCGC00092290-03	SL-327	MAP2K1	-2.4	20.931	81.347	-4.6792	s-cd47-WT_JUR-1	NCGC00092290-03	-3	11.7704	79.195	-4.9292	0.25	2.152	-0.160713
s-cd47-CD47-1	NCGC00183677-03	Hypothemycin	MAP2K1	-1.1	1.8655	5.561	-5.7292	s-cd47-WT_JUR-1	NCGC00183677-03	-1.1	4.6859	3.165	-5.3292	-0.4	2.396	-0.145824
s-cd47-CD47-1	NCGC00025029-05	U-0126	MAP2K1	4	18.6548	73.969	-4.7292	s-cd47-WT_JUR-1	NCGC00025029-05	4	37.2212	70.995	-4.4292	-0.3	2.974	-0.110554
s-cd47-CD47-1	NCGC00346530-01	Pimasertib	MAP2K1	4	18.6548	100.435	-4.7292	s-cd47-WT_JUR-1	NCGC00346530-01	4	16.6261	92.361	-4.7792	0.05	8.074	0.20065
s-cd47-CD47-1	NCGC00263187-01	TAK-733	MAP2K1	4	0.0372	86.882	-7.4292	s-cd47-WT_JUR-1	NCGC00263187-01	4	13.2066	77.297	-4.8792	-2.55	9.585	0.292852
s-cd47-CD47-1	NCGC00346455-01	Cobimetinib	MAP2K1	-3	33.1734	21.533	-4.4792	s-cd47-WT_JUR-1	NCGC00346455-01	-3	26.3506	11.864	-4.5792	0.1	9.669	0.297978
s-cd47-CD47-1	NCGC00263180-01	Trametinib	MAP2K1	4	1.3207	101.454	-5.8792	s-cd47-WT_JUR-1	NCGC00263180-01	-1.4	3.3173	86.488	-5.4792	-0.4	14.966	0.621202
s-cd47-CD47-1	NCGC00189075-01	PD-0325901	MAP2K1	-3	26.3506	44.952	-4.5792	s-cd47-WT_JUR-1	NCGC00189075-01	-2.1	23.485	27.817	-4.6292	0.05	17.135	0.753556
s-cd47-CD47-1	NCGC00189074-01	PD-184352	MAP2K1	-2.2	16.6261	42.673	-4.7792	s-cd47-WT_JUR-1	NCGC00189074-01	-1.1	10.4904	14.102	-4.9792	0.2	28.571	1.45138
s-cd47-CD47-1	NCGC00346544-01	BIX 02189	MAP2K5	-1.1	1.6626	21.19	-5.7792	s-cd47-WT_JUR-1	NCGC00346544-01	-2.2	16.6261	45.196	-4.7792	-1	-24.006	-1.75688
s-cd47-CD47-1	NCGC00346543-01	BIX 02188	MAP2K5	4	0.0264	90.587	-7.5792	s-cd47-WT_JUR-1	NCGC00346543-01	4	37.2212	82.511	-4.4292	-3.15	8.076	0.200772
s-cd47-CD47-1	NCGC00345841-01	S-99	MAP3K5	4	1.049	117.561	-5.9792	s-cd47-WT_JUR-1	NCGC00345841-01	4	1.6626	100.685	-5.7792	-0.2	16.876	0.737751
s-cd47-CD47-1	NCGC00274038-01	AZ-TAK1 Inhibitor	MAP3K7	-2.2	18.6548	53.493	-4.7292	s-cd47-WT_JUR-1	NCGC00274038-01	-3	26.3506	45.002	-4.5792	-0.15	8.491	0.226096
s-cd47-CD47-1	NCGC00273985-03	Wyeth Cot inhibitor-2	MAP3K8	-2.1	23.485	0.733	-4.6292	s-cd47-WT_JUR-1	NCGC00273985-03	-2.1	20.931	0.632	-4.6792	0.05	0.101	-0.285865
s-cd47-CD47-1	NCGC00273984-03	SB-747651-A	MAPK11	-2.4	18.6548	73.712	-4.7292	s-cd47-WT_JUR-1	NCGC00273984-03	-2.2	11.7704	64.248	-4.9292	0.2	9.464	0.285468
s-cd47-CD47-1	NCGC00241111-02	VX-745	MAPK14	-3	26.3506	48.728	-4.5792	s-cd47-WT_JUR-1	NCGC00241111-02	-2.2	18.6548	73.893	-4.7292	0.15	-25.165	-1.82761
s-cd47-CD47-1	NCGC00262195-02	R-1487	MAPK14	-3	23.485	66.665	-4.6292	s-cd47-WT_JUR-1	NCGC00262195-02	4	5.2576	87.472	-5.2792	0.65	-20.807	-1.56168
s-cd47-CD47-1	NCGC00025035-05	SB-203580	MAPK14	-2.2	27.0412	33.49	-4.568	s-cd47-WT_JUR-1	NCGC00025035-05	-2.2	34.0429	52.372	-4.468	-0.1	-18.882	-1.44421
s-cd47-CD47-1	NCGC00249684-01	VX-702	MAPK14	4		99.206		s-cd47-WT_JUR-1	NCGC00249684-01	4		112.908		0	-13.702	-1.12813
s-cd47-CD47-1	NCGC00162142-03	SD-169	MAPK14	4	1.4818	101.793	-5.8292	s-cd47-WT_JUR-1	NCGC00162142-03	4		112.272		-5.8292	-10.479	-0.931461
s-cd47-CD47-1	NCGC00241104-01	Doramapimod	MAPK14	-3	33.1734	26.661	-4.4792	s-cd47-WT_JUR-1	NCGC00241104-01	-3	33.1734	36.995	-4.4792	0	-10.334	-0.922613
s-cd47-CD47-1	NCGC00346804-01	EO-1428	MAPK14	-2.1	16.6261	8.502	-4.7792	s-cd47-WT_JUR-1	NCGC00346804-01	-2.1	29.5659	13.95	-4.5292	-0.25	-5.448	-0.624467
s-cd47-CD47-1	NCGC00345831-01	SB-242235	MAPK14	-2.2	18.6548	67.691	-4.7292	s-cd47-WT_JUR-1	NCGC00345831-01	-2.2	20.931	72.472	-4.6792	-0.05	-4.781	-0.583767
s-cd47-CD47-1	NCGC00346537-01	LY-2228820	MAPK14	-2.1	20.931	11.198	-4.6792	s-cd47-WT_JUR-1	NCGC00346537-01	-2.1	23.485	11.944	-4.6292	-0.05	-0.746	-0.33755
s-cd47-CD47-1	NCGC00345832-01	SD-06	MAPK14	4	2.9566	98.242	-5.5292	s-cd47-WT_JUR-1	NCGC00345832-01	4	1.3207	97.301	-5.8792	0.35	0.941	-0.234608
s-cd47-CD47-1	NCGC00263165-01	PH-797804	MAPK14	1.4	0.0019	90.796	-8.7292	s-cd47-WT_JUR-1	NCGC00263165-01	4	2.0931	88.552	-5.6792	-3.05	2.244	-0.155099
s-cd47-CD47-1	NCGC00263140-01	Talmapimod	MAPK14	-3	26.3506	80.975	-4.5792	s-cd47-WT_JUR-1	NCGC00263140-01	-3	33.1734	75.736	-4.4792	-0.1	5.239	0.0276574
s-cd47-CD47-1	NCGC00241112-01	RWJ-67657	MAPK14	-2.2	20.931	48.827	-4.6792	s-cd47-WT_JUR-1	NCGC00241112-01	-3	33.1734	38.784	-4.4792	-0.2	10.043	0.320799
s-cd47-CD47-1	NCGC00025329-02	SB-239063	MAPK14	4	6.619	107.171	-5.1792	s-cd47-WT_JUR-1	NCGC00025329-02	4	13.2066	92.703	-4.8792	-0.3	14.468	0.590814
s-cd47-CD47-1	NCGC00345834-01	TAK-715	MAPK14	-2.2	18.6548	42.877	-4.7292	s-cd47-WT_JUR-1	NCGC00345834-01	-2.1	20.931	26.007	-4.6792	-0.05	16.87	0.737385
s-cd47-CD47-1	NCGC00015962-02	SB-202190	MAPK14	-3	23.485	51.449	-4.6292	s-cd47-WT_JUR-1	NCGC00015962-02	-2.2	23.485	31.299	-4.6292	0	20.15	0.937532
s-cd47-CD47-1	NCGC00242487-01	NCGC00242487	MAPK7	-2.1	14.818	1.202	-4.8292	s-cd47-WT_JUR-1	NCGC00242487-01	-2.1	11.7704	1.496	-4.9292	0.1	-0.294	-0.309968
s-cd47-CD47-1	NCGC00183912-01	FR-180204	MAPK7	-3	26.3506	8.906	-4.5792	s-cd47-WT_JUR-1	NCGC00183912-01	-2.1	23.485	3.494	-4.6292	0.05	5.412	0.0382139
s-cd47-CD47-1	NCGC00250385-02	XMD8-92	MAPK7	-2.2	11.7704	39.731	-4.9292	s-cd47-WT_JUR-1	NCGC00250385-02	-1.2	10.4904	15.283	-4.9792	0.05	24.448	1.1998
s-cd47-CD47-1	NCGC00345826-01	CC-401	MAPK8	-2.2	16.6261	61.252	-4.7792	s-cd47-WT_JUR-1	NCGC00345826-01	-3	20.931	74.316	-4.6792	-0.1	-13.064	-1.0892
s-cd47-CD47-1	NCGC00263145-01	BI-78D3	MAPK8	-1.1	5.8992	-1.349	-5.2292	s-cd47-WT_JUR-1	NCGC00263145-01	-1.1	2.6351	0.578	-5.5792	0.35	-1.927	-0.409615
s-cd47-CD47-1	NCGC00263146-01	SR-3306	MAPK8	-1.1	0.1049	-0.279	-6.9792	s-cd47-WT_JUR-1	NCGC00263146-01	-1.1	0.0743	1.629	-7.1292	0.15	-1.908	-0.408455
s-cd47-CD47-1	NCGC00015958-02	SP-600125	MAPK8	-2.2	16.6261	49.183	-4.7792	s-cd47-WT_JUR-1	NCGC00015958-02	-2.2	18.6548	47.402	-4.7292	-0.05	1.781	-0.183351
s-cd47-CD47-1	NCGC00345850-01	AS-602801	MAPK8	-2.2	18.6548	22.689	-4.7292	s-cd47-WT_JUR-1	NCGC00345850-01	-2.1	16.6261	17.372	-4.7792	0.05	5.317	0.0324169
s-cd47-CD47-1	NCGC00346953-01	JNK Inhibitor V	MAPK8	-2.1	16.6261	18.785	-4.7792	s-cd47-WT_JUR-1	NCGC00346953-01	-2.1	16.6261	7.747	-4.7792	0	11.038	0.381514
s-cd47-CD47-1	NCGC00242227-02	TCS JNK 5a	MAPK8	-1.2	0.4176	21.7	-6.3792	s-cd47-WT_JUR-1	NCGC00242227-02	-1.1	0.2635	9.933	-6.5792	0.2	11.767	0.425998
s-cd47-CD47-1	NCGC00346960-01	HMSL10058	MAPK8	-3	29.5659	49.422	-4.5292	s-cd47-WT_JUR-1	NCGC00346960-01	-3	29.5659	14.124	-4.5292	0	35.298	1.86187
s-cd47-CD47-1	NCGC00347283-01	VU0483488-1	MCL1	-2.1	26.3506	13.02	-4.5792	s-cd47-WT_JUR-1	NCGC00347283-01	-3	26.3506	22.247	-4.5792	0	-9.227	-0.855063
s-cd47-CD47-1	NCGC00347282-01	VU0483487-1	MCL1	-2.1	26.3506	2.206	-4.5792	s-cd47-WT_JUR-1	NCGC00347282-01	-3	26.3506	6.041	-4.5792	0	-3.835	-0.526041
s-cd47-CD47-1	NCGC00347174-02	VU0482089-2	MCL1	-1.1	5.8992	-0.59	-5.2292	s-cd47-WT_JUR-1	NCGC00347174-02	-1.1	1.8655	0.871	-5.7292	0.5	-1.461	-0.381179
s-cd47-CD47-1	NCGC00347281-01	VU0483486-1	MCL1	-3	26.3506	4.71	-4.5792	s-cd47-WT_JUR-1	NCGC00347281-01	-3	37.2212	-0.049	-4.4292	-0.15	4.759	-0.00163242
s-cd47-CD47-1	NCGC00159570-01	RITA	MDM2	-3	26.3506	7.418	-4.5792	s-cd47-WT_JUR-1	NCGC00159570-01	-2.1	26.3506	0.807	-4.5792	0	6.611	0.111377
s-cd47-CD47-1	NCGC00263171-01	Serdemetan	MDM2	-2.1	20.931	22.184	-4.6792	s-cd47-WT_JUR-1	NCGC00263171-01	-2.1	20.931	2.779	-4.6792	0	19.405	0.892072
s-cd47-CD47-1	NCGC00014873-04	HLI-373989	MDM2	-2.1	14.818	27.558	-4.8292	s-cd47-WT_JUR-1	NCGC00014873-04	-2.1	16.6261	1.53	-4.7792	-0.05	26.028	1.29621
s-cd47-CD47-1	NCGC00263124-01	Nutlin-3	MDM2	-2.2	20.931	49.966	-4.6792	s-cd47-WT_JUR-1	NCGC00263124-01	-2.1	23.485	7.821	-4.6292	-0.05	42.145	2.27967
s-cd47-CD47-1	NCGC00246958-02	NSC-207895	MDM4	-2.1	20.931	11.427	-4.6792	s-cd47-WT_JUR-1	NCGC00246958-02	-2.1	20.931	5.685	-4.6792	0	5.742	0.0583506
s-cd47-CD47-1	NCGC00263212-01	SJ-172550	MDM4	-2.4	18.6548	38.113	-4.7292	s-cd47-WT_JUR-1	NCGC00263212-01	1.1	0.0012	21.847	-8.9292	4.2	16.266	0.700529
s-cd47-CD47-1	NCGC00346507-01	AMG-208	MET	4	2.0931	110.801	-5.6792	s-cd47-WT_JUR-1	NCGC00346507-01	-1.2	2.0931	117.149	-5.6792	0	-6.348	-0.679386
s-cd47-CD47-1	NCGC00263161-01	PF-04217903	MET	4	18.6548	101.325	-4.7292	s-cd47-WT_JUR-1	NCGC00263161-01	4	18.6548	104.54	-4.7292	0	-3.215	-0.488209
s-cd47-CD47-1	NCGC00263157-01	BMS-777607	MET	-3	26.3506	68.276	-4.5792	s-cd47-WT_JUR-1	NCGC00263157-01	-3	26.3506	70.131	-4.5792	0	-1.855	-0.405221
s-cd47-CD47-1	NCGC00263201-01	AMG-51	MET	-2.1	18.6548	-0.359	-4.7292	s-cd47-WT_JUR-1	NCGC00263201-01	-2.1	14.818	0.32	-4.8292	0.1	-0.679	-0.333461
s-cd47-CD47-1	NCGC00263189-01	JNJ-38877605	MET	4	37.2212	94.567	-4.4292	s-cd47-WT_JUR-1	NCGC00263189-01	-2.4	16.6261	95.219	-4.7792	0.35	-0.652	-0.331814
s-cd47-CD47-1	NCGC00250400-01	Crizotinib	MET	-2.1	20.931	1.418	-4.6792	s-cd47-WT_JUR-1	NCGC00250400-01	-2.1	18.6548	1.948	-4.7292	0.05	-0.53	-0.324369
s-cd47-CD47-1	NCGC00346642-01	PHA-665752	MET	-2.1	16.6261	-0.575	-4.7792	s-cd47-WT_JUR-1	NCGC00346642-01	-2.1	20.931	-0.565	-4.6792	-0.1	-0.01	-0.292639
s-cd47-CD47-1	NCGC00165902-02	SU-MI-2	MET	-2.1	20.931	-0.252	-4.6792	s-cd47-WT_JUR-1	NCGC00165902-02	-2.1	18.6548	-0.642	-4.7292	0.05	0.39	-0.26823
s-cd47-CD47-1	NCGC00263163-02	SGX-523	MET	-3	10.4904	88.984	-4.9792	s-cd47-WT_JUR-1	NCGC00263163-02	4	8.3328	82.695	-5.0792	0.1	6.289	0.0917287
s-cd47-CD47-1	NCGC00345824-01	BMS-2	MET	-2.2	6.619	105.414	-5.1792	s-cd47-WT_JUR-1	NCGC00345824-01	4	0.6619	96.485	-6.1792	1	8.929	0.252822
s-cd47-CD47-1	NCGC00346670-01	AMG-458	MET	-2.2	18.6548	43.868	-4.7292	s-cd47-WT_JUR-1	NCGC00346670-01	-3	26.3506	28.663	-4.5792	-0.15	15.205	0.635786
s-cd47-CD47-1	NCGC00346702-01	INCB-28060	MET	-3	37.2212	59.997	-4.4292	s-cd47-WT_JUR-1	NCGC00346702-01	-2.4	9.3495	40.06	-5.0292	0.6	19.937	0.924535
s-cd47-CD47-1	NCGC00346686-01	Tivantinib	MET	-1.2	0.1177	35.424	-6.9292	s-cd47-WT_JUR-1	NCGC00346686-01	-1.1	0.0935	9.411	-7.0292	0.1	26.013	1.29529
s-cd47-CD47-1	NCGC00345848-01	AMG-1	MET	-3	29.5659	40.721	-4.5292	s-cd47-WT_JUR-1	NCGC00345848-01	-2.1	23.485	12.765	-4.6292	0.1	27.956	1.41386
s-cd47-CD47-1	NCGC00346689-01	NVP-BVU-972	MET	4	18.6548	80.831	-4.7292	s-cd47-WT_JUR-1	NCGC00346689-01	-3	33.1734	49.524	-4.4792	-0.25	31.307	1.61834
s-cd47-CD47-1	NCGC00345793-01	EMD-1214063	MET	-2.1	16.6261	39.443	-4.7792	s-cd47-WT_JUR-1	NCGC00345793-01	-2.1	20.931	4.948	-4.6792	-0.1	34.495	1.81287
s-cd47-CD47-1	NCGC00346837-01	JZL-195	MGLL	-3	33.1734	74.81	-4.4792	s-cd47-WT_JUR-1	NCGC00346837-01	-2.4	37.2212	77.823	-4.4292	-0.05	-3.013	-0.475883
s-cd47-CD47-1	NCGC00263237-01	JZL-184	MGLL	4	18.6548	82.941	-4.7292	s-cd47-WT_JUR-1	NCGC00263237-01	4	23.485	78.64	-4.6292	-0.1	4.301	-0.0295797
s-cd47-CD47-1	NCGC00015144-04	O6-Benzylguanine	MGMT	4		68.756		s-cd47-WT_JUR-1	NCGC00015144-04	-3	33.1734	69.002	-4.4792	4.4792	-0.246	-0.307039
s-cd47-CD47-1	NCGC00345817-01	GM-6001	MMP1	-2.4	18.6548	72.418	-4.7292	s-cd47-WT_JUR-1	NCGC00345817-01	4	18.6548	86.806	-4.7292	0	-14.388	-1.16999
s-cd47-CD47-1	NCGC00346877-01	Batimastat	MMP1	-2.2	13.2066	53.539	-4.8792	s-cd47-WT_JUR-1	NCGC00346877-01	-2.2	18.6548	59.317	-4.7292	-0.15	-5.778	-0.644604
s-cd47-CD47-1	NCGC00016246-12	Chlorhexidine	MMP1	-2.1	13.2066	0.706	-4.8792	s-cd47-WT_JUR-1	NCGC00016246-12	-2.1	16.6261	1.092	-4.7792	-0.1	-0.386	-0.315582
s-cd47-CD47-1	NCGC00345816-01	GM-1489	MMP1	4	0.0118	92.753	-7.9292	s-cd47-WT_JUR-1	NCGC00345816-01	-3	33.1734	73.221	-4.4792	-3.45	19.532	0.899821
s-cd47-CD47-1	NCGC00161602-05	Doxycycline	MMP1	-2.2	16.6261	47.095	-4.7792	s-cd47-WT_JUR-1	NCGC00161602-05	-3	29.5659	19.309	-4.5292	-0.25	27.786	1.40348
s-cd47-CD47-1	NCGC00167801-01	CL 82198	MMP13	4		107.723		s-cd47-WT_JUR-1	NCGC00167801-01	4		108.619		0	-0.896	-0.346703
s-cd47-CD47-1	NCGC00263127-01	PD-166793	MMP13	-2.2	23.485	46.846	-4.6292	s-cd47-WT_JUR-1	NCGC00263127-01	-3	33.1734	10.39	-4.4792	-0.15	36.456	1.93253
s-cd47-CD47-1	NCGC00263218-02	Teriflunomide	MMP2	-2.2	4.6859	50.687	-5.3292	s-cd47-WT_JUR-1	NCGC00263218-02	-2.2	9.3495	49.011	-5.0292	-0.3	1.676	-0.189758
s-cd47-CD47-1	NCGC00346932-01	SB-3CT	MMP2	-2.1	23.485	2.621	-4.6292	s-cd47-WT_JUR-1	NCGC00346932-01	-2.1	18.6548	0.29	-4.7292	0.1	2.331	-0.14979
s-cd47-CD47-1	NCGC00274067-01	Eltrombopag olamine	MPL	-2.1	14.818	33.444	-4.8292	s-cd47-WT_JUR-1	NCGC00274067-01	-2.1	9.3495	9.025	-5.0292	0.2	24.419	1.19803
s-cd47-CD47-1	NCGC00160396-02	Pravadoline	MT-CO1	4		110.289		s-cd47-WT_JUR-1	NCGC00160396-02	4	23.485	83.446	-4.6292	4.6292	26.843	1.34594
s-cd47-CD47-1	NCGC00178707-03	Ramelteon	MTNR1A	4		80.323		s-cd47-WT_JUR-1	NCGC00178707-03	4	0.0009	80	-9.0292	9.0292	0.323	-0.272319
s-cd47-CD47-1	NCGC00346698-01	AZD-2014	MTOR	-1.2	0.1321	44.092	-6.8792	s-cd47-WT_JUR-1	NCGC00346698-01	-1.2	0.1177	47.242	-6.9292	0.05	-3.15	-0.484242
s-cd47-CD47-1	NCGC00167518-03	Temsirolimus	MTOR	-3	26.3506	1.898	-4.5792	s-cd47-WT_JUR-1	NCGC00167518-03	-3	26.3506	3.114	-4.5792	0	-1.216	-0.366229
s-cd47-CD47-1	NCGC00346634-01	WAY-600	MTOR	-2.1	18.6548	4.861	-4.7292	s-cd47-WT_JUR-1	NCGC00346634-01	-2.1	16.6261	2.574	-4.7792	0.05	2.287	-0.152475
s-cd47-CD47-1	NCGC00346636-01	WYE-687	MTOR	-2.1	14.818	5.997	-4.8292	s-cd47-WT_JUR-1	NCGC00346636-01	-2.2	23.485	2.989	-4.6292	-0.2	3.008	-0.108479
s-cd47-CD47-1	NCGC00250396-01	KU-0063794	MTOR	-1.2	0.6619	43.047	-6.1792	s-cd47-WT_JUR-1	NCGC00250396-01	-2.2	4.1763	36.832	-5.3792	-0.8	6.215	0.0872132
s-cd47-CD47-1	NCGC00015448-04	Salirasib	MTOR	-2.2	5.8992	55.038	-5.2292	s-cd47-WT_JUR-1	NCGC00015448-04	-2.2	6.619	46.392	-5.1792	-0.05	8.646	0.235554
s-cd47-CD47-1	NCGC00263109-02	GDC-0980	MTOR	-1.2	0.1663	31.896	-6.7792	s-cd47-WT_JUR-1	NCGC00263109-02	-1.1	0.2957	23.086	-6.5292	-0.25	8.81	0.245561
s-cd47-CD47-1	NCGC00346654-01	INK-128	MTOR	-2.2	4.1763	13.249	-5.3792	s-cd47-WT_JUR-1	NCGC00346654-01	-2.1	0.3317	2.411	-6.4792	1.1	10.838	0.36931
s-cd47-CD47-1	NCGC00263215-02	Torin-1	MTOR	-1.2	0.0418	48.62	-7.3792	s-cd47-WT_JUR-1	NCGC00263215-02	-1.2	0.0264	37.438	-7.5792	0.2	11.182	0.390301
s-cd47-CD47-1	NCGC00250398-01	PF-05212384	MTOR	-2.2	0.5258	18.494	-6.2792	s-cd47-WT_JUR-1	NCGC00250398-01	-2.1	1.8655	6.973	-5.7292	-0.55	11.521	0.410987
s-cd47-CD47-1	NCGC00263216-02	Torin-2	MTOR	-1.2	0.0662	13.708	-7.1792	s-cd47-WT_JUR-1	NCGC00263216-02	-1.1	0.0372	1.683	-7.4292	0.25	12.025	0.441742
s-cd47-CD47-1	NCGC00242507-01	Everolimus	MTOR	-2.2	6.619	42.938	-5.1792	s-cd47-WT_JUR-1	NCGC00242507-01	-2.2	20.931	30.735	-4.6792	-0.5	12.203	0.452603
s-cd47-CD47-1	NCGC00250405-01	AZD-8055	MTOR	-1.2	0.1482	50.211	-6.8292	s-cd47-WT_JUR-1	NCGC00250405-01	-1.2	0.059	36.516	-7.2292	0.4	13.695	0.543646
s-cd47-CD47-1	NCGC00346541-01	XL-765	MTOR	-2.2	20.931	65.06	-4.6792	s-cd47-WT_JUR-1	NCGC00346541-01	-2.2	20.931	51.241	-4.6792	0	13.819	0.551212
s-cd47-CD47-1	NCGC00021305-08	Sirolimus	MTOR	-3	26.3506	22.313	-4.5792	s-cd47-WT_JUR-1	NCGC00021305-08	-3	26.3506	8.227	-4.5792	0	14.086	0.567504
s-cd47-CD47-1	NCGC00346635-01	WYE-125132	MTOR	-2.1	2.6351	23.319	-5.5792	s-cd47-WT_JUR-1	NCGC00346635-01	-2.1	6.619	8.513	-5.1792	-0.4	14.806	0.611439
s-cd47-CD47-1	NCGC00188346-01	PP-242	MTOR	-2.1	1.8655	19.779	-5.7292	s-cd47-WT_JUR-1	NCGC00188346-01	-2.1	1.8655	1.364	-5.7292	0	18.415	0.831662
s-cd47-CD47-1	NCGC00187481-04	BEZ235	MTOR	-1.1	0.1049	36.486	-6.9792	s-cd47-WT_JUR-1	NCGC00187481-04	-1.1	0.4686	17.377	-6.3292	-0.65	19.109	0.87401
s-cd47-CD47-1	NCGC00250395-01	OSI-027	MTOR	-2.1	1.4818	39.363	-5.8292	s-cd47-WT_JUR-1	NCGC00250395-01	-2.1	4.6859	19.943	-5.3292	-0.5	19.42	0.892987
s-cd47-CD47-1	NCGC00346481-01	Ridaforolimus	MTOR	-3		33.391		s-cd47-WT_JUR-1	NCGC00346481-01	-3	23.485	8.791	-4.6292	4.6292	24.6	1.20907
s-cd47-CD47-1	NCGC00242484-02	WYE-354	MTOR	-1.2	0.935	31.102	-6.0292	s-cd47-WT_JUR-1	NCGC00242484-02	-2.1	6.619	2.442	-5.1792	-0.85	28.66	1.45682
s-cd47-CD47-1	NCGC00185994-02	10058-F4	MYC	-2.4	37.2212	57.835	-4.4292	s-cd47-WT_JUR-1	NCGC00185994-02	1.4	0.0148	60.238	-7.8292	3.4	-2.403	-0.43866
s-cd47-CD47-1	NCGC00346825-01	10074-G5	MYC	-3	33.1734	53.243	-4.4792	s-cd47-WT_JUR-1	NCGC00346825-01	-3	33.1734	44.265	-4.4792	0	8.978	0.255812
s-cd47-CD47-1	NCGC00092288-01	(-)-Blebbistatin	MYH2	4		109.637		s-cd47-WT_JUR-1	NCGC00092288-01	-1.4	0.001	123.619	-8.9792	8.9792	-13.982	-1.14522
s-cd47-CD47-1	NCGC00346618-01	Omecamtiv mecarbil	MYH7	4	16.6261	88.962	-4.7792	s-cd47-WT_JUR-1	NCGC00346618-01	4	1.3207	123.752	-5.8792	1.1	-34.79	-2.41493
s-cd47-CD47-1	NCGC00095161-04	Rebamipide	NA	4		16.263		s-cd47-WT_JUR-1	NCGC00095161-04	1.2	0.0019	122.801	-8.7292	8.7292	-106.538	-6.79302
s-cd47-CD47-1	NCGC00346482-01	Mesna disulfide	NA	-1.3	0.0166	43.045	-7.7792	s-cd47-WT_JUR-1	NCGC00346482-01	1.4	0.0935	116.65	-7.0292	-0.75	-73.605	-4.78343
s-cd47-CD47-1	NCGC00179250-04	Halofantrine	NA	-2.1	16.6261	10.465	-4.7792	s-cd47-WT_JUR-1	NCGC00179250-04	-1.2	0.4686	60.477	-6.3292	1.55	-50.012	-3.34378
s-cd47-CD47-1	NCGC00179501-04	Aurantiamarin	NA	-3	23.485	67.839	-4.6292	s-cd47-WT_JUR-1	NCGC00179501-04	4		116.452		-4.6292	-48.613	-3.25841
s-cd47-CD47-1	NCGC00025341-01	Isradipine	NA	-3	26.3506	19.792	-4.5792	s-cd47-WT_JUR-1	NCGC00025341-01	-3	26.3506	62.311	-4.5792	0	-42.519	-2.88655
s-cd47-CD47-1	NCGC00018157-11	Flurbiprofen	NA	-3	23.485	62.136	-4.6292	s-cd47-WT_JUR-1	NCGC00018157-11	4	20.931	91.593	-4.6792	0.05	-29.457	-2.08951
s-cd47-CD47-1	NCGC00095188-04	Pantoprazole	NA	-3	37.2212	36.706	-4.4292	s-cd47-WT_JUR-1	NCGC00095188-04	-2.2	18.6548	66.017	-4.7292	0.3	-29.311	-2.0806
s-cd47-CD47-1	NCGC00166076-06	Arbutin	NA	-3	37.2212	28.628	-4.4292	s-cd47-WT_JUR-1	NCGC00166076-06	1.2	0.0042	57.156	-8.3792	3.95	-28.528	-2.03282
s-cd47-CD47-1	NCGC00015067-13	Aspirin	NA	-3	33.1734	16.503	-4.4792	s-cd47-WT_JUR-1	NCGC00015067-13	-3	33.1734	44.8	-4.4792	0	-28.297	-2.01872
s-cd47-CD47-1	NCGC00016543-08	Phenformin hydrochloride	NA	4		41.22		s-cd47-WT_JUR-1	NCGC00016543-08	-2.2	8.3328	69.356	-5.0792	5.0792	-28.136	-2.0089
s-cd47-CD47-1	NCGC00025235-01	Streptozocin	NA	4	0.0074	113.62	-8.1292	s-cd47-WT_JUR-1	NCGC00025235-01	1.4	0.0012	141.659	-8.9292	0.8	-28.039	-2.00298
s-cd47-CD47-1	NCGC00160670-04	Mecarbinate	NA	4	23.485	91.318	-4.6292	s-cd47-WT_JUR-1	NCGC00160670-04	4	1.049	118.635	-5.9792	1.35	-27.317	-1.95892
s-cd47-CD47-1	NCGC00181152-01	Nedaplatin	NA	1.4	0.0047	128.574	-8.3292	s-cd47-WT_JUR-1	NCGC00181152-01	4	0.1865	155.257	-6.7292	-1.6	-26.683	-1.92023
s-cd47-CD47-1	NCGC00095165-05	Carmofur	NA	-2.2	11.7704	46.001	-4.9292	s-cd47-WT_JUR-1	NCGC00095165-05	-2.2	16.6261	72.303	-4.7792	-0.15	-26.302	-1.89699
s-cd47-CD47-1	NCGC00016936-03	Aztreonam	NA	4	18.6548	95.289	-4.7292	s-cd47-WT_JUR-1	NCGC00016936-03	4	0.1482	121.39	-6.8292	2.1	-26.101	-1.88472
s-cd47-CD47-1	NCGC00347068-01	KUC103669N-04	NA	-3	33.1734	64.506	-4.4792	s-cd47-WT_JUR-1	NCGC00347068-01	4	18.6548	89.02	-4.7292	0.25	-24.514	-1.78788
s-cd47-CD47-1	NCGC00263532-03	Olopatadine hydrochloride	NA	-2.4	18.6548	58.027	-4.7292	s-cd47-WT_JUR-1	NCGC00263532-03	4	37.2212	82.386	-4.4292	-0.3	-24.359	-1.77842
s-cd47-CD47-1	NCGC00016410-18	Thiabendazole	NA	4		90.296		s-cd47-WT_JUR-1	NCGC00016410-18	4	0.0059	114.52	-8.2292	8.2292	-24.224	-1.77019
s-cd47-CD47-1	NCGC00181098-01	Nelarabine	NA	-2.4	14.818	66.009	-4.8292	s-cd47-WT_JUR-1	NCGC00181098-01	-2.4	16.6261	89.434	-4.7792	-0.05	-23.425	-1.72143
s-cd47-CD47-1	NCGC00015562-24	Indomethacin	NA	-3	37.2212	64.491	-4.4292	s-cd47-WT_JUR-1	NCGC00015562-24	4	37.2212	87.501	-4.4292	0	-23.01	-1.69611
s-cd47-CD47-1	NCGC00181303-02	Neomycin sulfate	NA	4	37.2212	100.261	-4.4292	s-cd47-WT_JUR-1	NCGC00181303-02	4		123.247		-4.4292	-22.986	-1.69464
s-cd47-CD47-1	NCGC00016456-12	5,7-Dihydroxyflavone	NA	-3	23.485	63.083	-4.6292	s-cd47-WT_JUR-1	NCGC00016456-12	4	37.2212	86.014	-4.4292	-0.2	-22.931	-1.69129
s-cd47-CD47-1	NCGC00015100-14	Altretamine	NA	-2.2	6.619	78.261	-5.1792	s-cd47-WT_JUR-1	NCGC00015100-14	4	0.1321	101.129	-6.8792	1.7	-22.868	-1.68744
s-cd47-CD47-1	NCGC00346668-01	Pramiracetam hydrochloride	NA	-1.4	8.3328	75.369	-5.0792	s-cd47-WT_JUR-1	NCGC00346668-01	4	0.0026	97.534	-8.5792	3.5	-22.165	-1.64454
s-cd47-CD47-1	NCGC00163547-02	Ecdysone	NA	4		98.663		s-cd47-WT_JUR-1	NCGC00163547-02	4		120.502		0	-21.839	-1.62465
s-cd47-CD47-1	NCGC00183848-01	Troxacitabine	NA	4		135.875		s-cd47-WT_JUR-1	NCGC00183848-01	4		157.558		0	-21.683	-1.61513
s-cd47-CD47-1	NCGC00167558-01	Fleroxacin	NA	4	16.6261	88.471	-4.7792	s-cd47-WT_JUR-1	NCGC00167558-01	1.4	0.0023	110.011	-8.6292	3.85	-21.54	-1.60641
s-cd47-CD47-1	NCGC00094571-07	Crotamiton	NA	4	29.5659	75.506	-4.5292	s-cd47-WT_JUR-1	NCGC00094571-07	4	0.0132	96.838	-7.8792	3.35	-21.332	-1.59371
s-cd47-CD47-1	NCGC00346729-01	Mitiglinide calcium hydrate	NA	1.4	0.0037	105.489	-8.4292	s-cd47-WT_JUR-1	NCGC00346729-01	4		125.699		-8.4292	-20.21	-1.52525
s-cd47-CD47-1	NCGC00344081-02	STF-62247	NA	-3	26.3506	33.57	-4.5792	s-cd47-WT_JUR-1	NCGC00344081-02	-3	37.2212	53.24	-4.4292	-0.15	-19.67	-1.4923
s-cd47-CD47-1	NCGC00015578-10	Ketoprofen	NA	-3	23.485	45.349	-4.6292	s-cd47-WT_JUR-1	NCGC00015578-10	-2.2	18.6548	64.481	-4.7292	0.1	-19.132	-1.45947
s-cd47-CD47-1	NCGC00347950-01	LGK974	NA	-2.2	16.6261	51.854	-4.7792	s-cd47-WT_JUR-1	NCGC00347950-01	-2.4	16.6261	70.755	-4.7792	0	-18.901	-1.44537
s-cd47-CD47-1	NCGC00094763-03	Polymyxin B sulphate	NA	4	16.6261	95.212	-4.7792	s-cd47-WT_JUR-1	NCGC00094763-03	4	0.003	113.68	-8.5292	3.75	-18.468	-1.41895
s-cd47-CD47-1	NCGC00346510-01	MGCD-265	NA	-2.2	18.6548	18.928	-4.7292	s-cd47-WT_JUR-1	NCGC00346510-01	-1.2	8.3328	37.181	-5.0792	0.35	-18.253	-1.40583
s-cd47-CD47-1	NCGC00159336-05	Sulbactam	NA	4		93.267		s-cd47-WT_JUR-1	NCGC00159336-05	4		111.452		0	-18.185	-1.40168
s-cd47-CD47-1	NCGC00094552-04	Pyrantel pamoate	NA	4	3.7221	87.816	-5.4292	s-cd47-WT_JUR-1	NCGC00094552-04	4	1.3207	105.598	-5.8792	0.45	-17.782	-1.37709
s-cd47-CD47-1	NCGC00345085-01	(-)-Indolactam V	NA	-1.2	0.1482	52.905	-6.8292	s-cd47-WT_JUR-1	NCGC00345085-01	-1.2	0.1321	70.41	-6.8792	0.05	-17.505	-1.36019
s-cd47-CD47-1	NCGC00095322-03	Coenzyme Q10	NA	4		96.196		s-cd47-WT_JUR-1	NCGC00095322-03	4		113.555		0	-17.359	-1.35128
s-cd47-CD47-1	NCGC00163125-07	Pregnenolone	NA	4	16.6261	93.875	-4.7792	s-cd47-WT_JUR-1	NCGC00163125-07	4		111.152		-4.7792	-17.277	-1.34628
s-cd47-CD47-1	NCGC00178319-07	Thiamphenicol	NA	-2.2	14.818	73.808	-4.8292	s-cd47-WT_JUR-1	NCGC00178319-07	4	37.2212	90.94	-4.4292	-0.4	-17.132	-1.33743
s-cd47-CD47-1	NCGC00183128-01	Glycyrrhizic acid	NA	4		101.603		s-cd47-WT_JUR-1	NCGC00183128-01	1.4	0.0118	118.592	-7.9292	7.9292	-16.989	-1.3287
s-cd47-CD47-1	NCGC00018102-06	Flunarizine	NA	-3	37.2212	68.665	-4.4292	s-cd47-WT_JUR-1	NCGC00018102-06	4	14.818	85.37	-4.8292	0.4	-16.705	-1.31137
s-cd47-CD47-1	NCGC00016332-03	Riboflavin	NA	4	13.2066	103.095	-4.8792	s-cd47-WT_JUR-1	NCGC00016332-03	4		119.687		-4.8792	-16.592	-1.30448
s-cd47-CD47-1	NCGC00017376-10	Tetrandrine	NA	-1.2	11.7704	53.5	-4.9292	s-cd47-WT_JUR-1	NCGC00017376-10	-1.2	8.3328	69.73	-5.0792	0.15	-16.23	-1.28239
s-cd47-CD47-1	NCGC00164634-01	Balsalazide disodium	NA	-2.1	26.3506	9.181	-4.5792	s-cd47-WT_JUR-1	NCGC00164634-01	-2.1	23.485	25.381	-4.6292	0.05	-16.2	-1.28056
s-cd47-CD47-1	NCGC00091585-03	Octocrylene	NA	-2.2	18.6548	66.204	-4.7292	s-cd47-WT_JUR-1	NCGC00091585-03	4	37.2212	82.394	-4.4292	-0.3	-16.19	-1.27995
s-cd47-CD47-1	NCGC00015150-04	Betaine	NA	4	10.4904	93.801	-4.9792	s-cd47-WT_JUR-1	NCGC00015150-04	4	16.6261	109.526	-4.7792	-0.2	-15.725	-1.25157
s-cd47-CD47-1	NCGC00263527-02	Isepamicin	NA	4	23.485	97.727	-4.6292	s-cd47-WT_JUR-1	NCGC00263527-02	4		112.864		-4.6292	-15.137	-1.21569
s-cd47-CD47-1	NCGC00079434-03	KL001	NA	-2.2	23.485	47.511	-4.6292	s-cd47-WT_JUR-1	NCGC00079434-03	-2.2	16.6261	62.374	-4.7792	0.15	-14.863	-1.19897
s-cd47-CD47-1	NCGC00160162-03	Hordenine	NA	4	4.1763	96.49	-5.3792	s-cd47-WT_JUR-1	NCGC00160162-03	4	0.5258	111.323	-6.2792	0.9	-14.833	-1.19714
s-cd47-CD47-1	NCGC00163633-03	Tetrahydropapaverine	NA	-2.2	18.6548	60.323	-4.7292	s-cd47-WT_JUR-1	NCGC00163633-03	4	0.0148	75.09	-7.8292	3.1	-14.767	-1.19312
s-cd47-CD47-1	NCGC00262929-02	BIBR 1048	NA	-2.4	20.931	17.925	-4.6792	s-cd47-WT_JUR-1	NCGC00262929-02	-2.2	20.931	32.311	-4.6792	0	-14.386	-1.16987
s-cd47-CD47-1	NCGC00167526-03	Camostat mesylate	NA	-2.4	13.2066	69.716	-4.8792	s-cd47-WT_JUR-1	NCGC00167526-03	4		84.052		-4.8792	-14.336	-1.16682
s-cd47-CD47-1	NCGC00017156-01	Cefoperazone sodium	NA	4	0.0004	110.915	-9.3743	s-cd47-WT_JUR-1	NCGC00017156-01	1.4	0.0006	125.103	-9.2243	-0.15	-14.188	-1.15779
s-cd47-CD47-1	NCGC00016360-05	Monobenzone	NA	-2.2	13.2066	73.93	-4.8792	s-cd47-WT_JUR-1	NCGC00016360-05	-2.4	7.4266	87.887	-5.1292	0.25	-13.957	-1.14369
s-cd47-CD47-1	NCGC00093354-09	Niacinamide	NA	4		94.347		s-cd47-WT_JUR-1	NCGC00093354-09	4	0.001	108.072	-8.9792	8.9792	-13.725	-1.12953
s-cd47-CD47-1	NCGC00248196-02	Tempol	NA	4		106.61		s-cd47-WT_JUR-1	NCGC00248196-02	1.4	0.0017	120.273	-8.7792	8.7792	-13.663	-1.12575
s-cd47-CD47-1	NCGC00018176-04	Estrone	NA	-2.4	14.818	78.431	-4.8292	s-cd47-WT_JUR-1	NCGC00018176-04	4	8.3328	92.048	-5.0792	0.25	-13.617	-1.12294
s-cd47-CD47-1	NCGC00347953-01	OAC1	NA	-2.1	10.4904	9.048	-4.9792	s-cd47-WT_JUR-1	NCGC00347953-01	-2.1	11.7704	22.559	-4.9292	-0.05	-13.511	-1.11647
s-cd47-CD47-1	NCGC00178054-05	Clarithromycin	NA	4	0.6619	85.081	-6.1792	s-cd47-WT_JUR-1	NCGC00178054-05	4	0.0372	97.91	-7.4292	1.25	-12.829	-1.07486
s-cd47-CD47-1	NCGC00016446-12	Metronidazole	NA	4		107.533		s-cd47-WT_JUR-1	NCGC00016446-12	4	0.0021	120.314	-8.6792	8.6792	-12.781	-1.07193
s-cd47-CD47-1	NCGC00346701-01	Laquinimod	NA	-2.2	8.3328	76.124	-5.0792	s-cd47-WT_JUR-1	NCGC00346701-01	1.4	0.001	88.844	-8.9792	3.9	-12.72	-1.06821
s-cd47-CD47-1	NCGC00346434-01	Imipenem	NA	4	37.2212	74.448	-4.4292	s-cd47-WT_JUR-1	NCGC00346434-01	4	0.001	87.12	-8.9792	4.55	-12.672	-1.06528
s-cd47-CD47-1	NCGC00091062-07	5-Hydroxytryptophan	NA	4	33.1734	79.292	-4.4792	s-cd47-WT_JUR-1	NCGC00091062-07	4	4.6859	91.909	-5.3292	0.85	-12.617	-1.06192
s-cd47-CD47-1	NCGC00015121-16	Phenoxybenzamine hydrochloride	NA	1.1	0.0132	75.46	-7.8792	s-cd47-WT_JUR-1	NCGC00015121-16	4	29.5659	88.044	-4.5292	-3.35	-12.584	-1.05991
s-cd47-CD47-1	NCGC00159508-05	Rose Bengal disodium	NA	-2.4	14.818	43.519	-4.8292	s-cd47-WT_JUR-1	NCGC00159508-05	-2.2	13.2066	55.984	-4.8792	0.05	-12.465	-1.05265
s-cd47-CD47-1	NCGC00183361-01	Oxacillin sodium	NA	4	10.4904	99.935	-4.9792	s-cd47-WT_JUR-1	NCGC00183361-01	4		112.313		-4.9792	-12.378	-1.04734
s-cd47-CD47-1	NCGC00346489-01	BTZ-10526043	NA	-2.4	2.6351	76.558	-5.5792	s-cd47-WT_JUR-1	NCGC00346489-01	4	4.1763	88.578	-5.3792	-0.2	-12.02	-1.02549
s-cd47-CD47-1	NCGC00183837-01	Monatepil	NA	-1.2	6.619	59.312	-5.1792	s-cd47-WT_JUR-1	NCGC00183837-01	-2.2	13.2066	71.172	-4.8792	-0.3	-11.86	-1.01573
s-cd47-CD47-1	NCGC00344515-02	Piperaquine	NA	4		103.775		s-cd47-WT_JUR-1	NCGC00344515-02	4	3.2328	115.611	-5.4904	5.4904	-11.836	-1.01427
s-cd47-CD47-1	NCGC00346463-01	Nesbuvir	NA	-2.4	11.7704	59.009	-4.9292	s-cd47-WT_JUR-1	NCGC00346463-01	-2.4	16.6261	70.798	-4.7792	-0.15	-11.789	-1.0114
s-cd47-CD47-1	NCGC00015418-08	Ethosuximide	NA	4		114.827		s-cd47-WT_JUR-1	NCGC00015418-08	4		126.569		0	-11.742	-1.00853
s-cd47-CD47-1	NCGC00016552-02	7-Aminocephalosporanic acid	NA	4		100.136		s-cd47-WT_JUR-1	NCGC00016552-02	4		111.778		0	-11.642	-1.00243
s-cd47-CD47-1	NCGC00182851-01	Meprednisone	NA	4		89.589		s-cd47-WT_JUR-1	NCGC00182851-01	4		100.9		0	-11.311	-0.98223
s-cd47-CD47-1	NCGC00346663-01	Geniposidic acid	NA	4	0.0418	91.804	-7.3792	s-cd47-WT_JUR-1	NCGC00346663-01	4	0.0332	102.782	-7.4792	0.1	-10.978	-0.96191
s-cd47-CD47-1	NCGC00263531-03	Linezolid	NA	4		89.129		s-cd47-WT_JUR-1	NCGC00263531-03	-1.4	0.001	99.98	-8.9792	8.9792	-10.851	-0.95416
s-cd47-CD47-1	NCGC00016384-14	Sulfafurazole	NA	4		97.828		s-cd47-WT_JUR-1	NCGC00016384-14	4	0.0235	108.593	-7.6292	7.6292	-10.765	-0.948913
s-cd47-CD47-1	NCGC00178499-03	Cefdinir	NA	4	0.0094	113.688	-8.0292	s-cd47-WT_JUR-1	NCGC00178499-03	4	0.001	124.449	-8.9792	0.95	-10.761	-0.948668
s-cd47-CD47-1	NCGC00018218-03	Edaravone	NA	4	10.4904	94.32	-4.9792	s-cd47-WT_JUR-1	NCGC00018218-03	4	0.3317	104.998	-6.4792	1.5	-10.678	-0.943604
s-cd47-CD47-1	NCGC00346609-01	Gentamycin sulfate	NA	4	0.935	85.637	-6.0292	s-cd47-WT_JUR-1	NCGC00346609-01	4	37.2212	96.262	-4.4292	-1.6	-10.625	-0.94037
s-cd47-CD47-1	NCGC00142624-04	Lactulose	NA	4	37.2212	82.664	-4.4292	s-cd47-WT_JUR-1	NCGC00142624-04	4	37.2212	93.197	-4.4292	0	-10.533	-0.934756
s-cd47-CD47-1	NCGC00015590-07	Linopirdine	NA	4		104.18		s-cd47-WT_JUR-1	NCGC00015590-07	4	23.485	114.598	-4.6292	4.6292	-10.418	-0.927738
s-cd47-CD47-1	NCGC00173359-06	Tetrahydroberberine Canadine	NA	-2.2	13.2066	47.172	-4.8792	s-cd47-WT_JUR-1	NCGC00173359-06	-2.2	11.7704	57.576	-4.9292	0.05	-10.404	-0.926884
s-cd47-CD47-1	NCGC00091281-07	Daminozide	NA	4	0.0118	101.367	-7.9292	s-cd47-WT_JUR-1	NCGC00091281-07	4	0.1049	111.755	-6.9792	-0.95	-10.388	-0.925908
s-cd47-CD47-1	NCGC00346540-01	Fesoterodine fumarate	NA	-2.4	13.2066	72.089	-4.8792	s-cd47-WT_JUR-1	NCGC00346540-01	4	13.2066	82.429	-4.8792	0	-10.34	-0.922979
s-cd47-CD47-1	NCGC00159356-02	Nandrolone phenylpropionate	NA	1.3	0.3317	86.365	-6.4792	s-cd47-WT_JUR-1	NCGC00159356-02	1.4	0.0023	96.432	-8.6292	2.15	-10.067	-0.90632
s-cd47-CD47-1	NCGC00183036-02	Cephradine	NA	4	0.0026	114.244	-8.5792	s-cd47-WT_JUR-1	NCGC00183036-02	4		124.087		-8.5792	-9.843	-0.892652
s-cd47-CD47-1	NCGC00016623-06	Moroxydine	NA	4	6.619	101.052	-5.1792	s-cd47-WT_JUR-1	NCGC00016623-06	4		110.889		-5.1792	-9.837	-0.892286
s-cd47-CD47-1	NCGC00095158-05	Secnidazole	NA	4	0.0132	96.245	-7.8792	s-cd47-WT_JUR-1	NCGC00095158-05	4	0.001	106.023	-8.9792	1.1	-9.778	-0.888685
s-cd47-CD47-1	NCGC00016879-07	Torasemide	NA	4	37.2212	88.603	-4.4292	s-cd47-WT_JUR-1	NCGC00016879-07	4	1.177	98.355	-5.9292	1.5	-9.752	-0.887099
s-cd47-CD47-1	NCGC00167978-02	Ceftiofur hydrochloride	NA	4	0.0009	98.031	-9.0292	s-cd47-WT_JUR-1	NCGC00167978-02	4		107.74		-9.0292	-9.709	-0.884475
s-cd47-CD47-1	NCGC00167467-04	Vecuronium bromide	NA	4	11.7704	94.4	-4.9292	s-cd47-WT_JUR-1	NCGC00167467-04	4	0.0118	104.046	-7.9292	3	-9.646	-0.880631
s-cd47-CD47-1	NCGC00092360-01	Cordycepin	NA	4	0.0372	93.231	-7.4292	s-cd47-WT_JUR-1	NCGC00092360-01	4	0.0132	102.717	-7.8792	0.45	-9.486	-0.870867
s-cd47-CD47-1	NCGC00165909-03	TRAM-34	NA	-2.4	13.2066	51.162	-4.8792	s-cd47-WT_JUR-1	NCGC00165909-03	-3	26.3506	60.527	-4.5792	-0.3	-9.365	-0.863484
s-cd47-CD47-1	NCGC00346562-01	Cefditoren pivoxil	NA	4		106.087		s-cd47-WT_JUR-1	NCGC00346562-01	4	0.8333	115.414	-6.0792	6.0792	-9.327	-0.861165
s-cd47-CD47-1	NCGC00016497-08	Ethionamide	NA	4	0.001	119.61	-8.9792	s-cd47-WT_JUR-1	NCGC00016497-08	4	9.3495	128.929	-5.0292	-3.95	-9.319	-0.860677
s-cd47-CD47-1	NCGC00346608-01	Astragaloside A	NA	4		99.168		s-cd47-WT_JUR-1	NCGC00346608-01	4	0.0094	108.483	-8.0292	8.0292	-9.315	-0.860433
s-cd47-CD47-1	NCGC00142599-02	Stigmasterol	NA	-2.4	7.2374	63.94	-5.1404	s-cd47-WT_JUR-1	NCGC00142599-02	4	0.0005	73.09	-9.2904	4.15	-9.15	-0.850365
s-cd47-CD47-1	NCGC00163553-02	Evodiamine	NA	4	0.0019	118.039	-8.7292	s-cd47-WT_JUR-1	NCGC00163553-02	4		127.053		-8.7292	-9.014	-0.842066
s-cd47-CD47-1	NCGC00159370-05	Docosanol	NA	4		100.681		s-cd47-WT_JUR-1	NCGC00159370-05	4		109.681		0	-9	-0.841212
s-cd47-CD47-1	NCGC00346682-01	PA-824	NA	-2.1	20.931	9.016	-4.6792	s-cd47-WT_JUR-1	NCGC00346682-01	-2.1	26.3506	18.009	-4.5792	-0.1	-8.993	-0.840784
s-cd47-CD47-1	NCGC00016641-01	Streptomycin sulfate	NA	4	0.0376	108.458	-7.4243	s-cd47-WT_JUR-1	NCGC00016641-01	4		117.443		-7.4243	-8.985	-0.840296
s-cd47-CD47-1	NCGC00346728-01	Bacitracin Zinc	NA	4	1.6626	100.857	-5.7792	s-cd47-WT_JUR-1	NCGC00346728-01	4		109.779		-5.7792	-8.922	-0.836452
s-cd47-CD47-1	NCGC00263566-03	Oteracil potassium	NA	4	1.1471	82.803	-5.9404	s-cd47-WT_JUR-1	NCGC00263566-03	4	6.4504	91.701	-5.1904	-0.75	-8.898	-0.834987
s-cd47-CD47-1	NCGC00159326-02	Lincomycin hydrochloride	NA	4		95.34		s-cd47-WT_JUR-1	NCGC00159326-02	4	2.6351	104.078	-5.5792	5.5792	-8.738	-0.825224
s-cd47-CD47-1	NCGC00090766-08	Prednisone???	NA	4	8.1205	91.539	-5.0904	s-cd47-WT_JUR-1	NCGC00090766-08	4	4.5665	100.052	-5.3404	0.25	-8.513	-0.811495
s-cd47-CD47-1	NCGC00017369-10	Biochanin A	NA	4	37.2212	92.478	-4.4292	s-cd47-WT_JUR-1	NCGC00017369-10	4	23.485	100.911	-4.6292	0.2	-8.433	-0.806613
s-cd47-CD47-1	NCGC00167485-02	Doripenem	NA	4	11.7704	99.318	-4.9292	s-cd47-WT_JUR-1	NCGC00167485-02	4	6.619	107.718	-5.1792	0.25	-8.4	-0.804599
s-cd47-CD47-1	NCGC00346474-01	NMP	NA	4	0.1482	95.06	-6.8292	s-cd47-WT_JUR-1	NCGC00346474-01	4	0.0015	103.427	-8.8292	2	-8.367	-0.802586
s-cd47-CD47-1	NCGC00095107-10	Gliclazide	NA	-2.1	26.3506	8.66	-4.5792	s-cd47-WT_JUR-1	NCGC00095107-10	-3	33.1734	16.842	-4.4792	-0.1	-8.182	-0.791297
s-cd47-CD47-1	NCGC00015680-14	Melatonin	NA	-1.1	1.3207	8.255	-5.8792	s-cd47-WT_JUR-1	NCGC00015680-14	-1.1	2.0931	16.426	-5.6792	-0.2	-8.171	-0.790626
s-cd47-CD47-1	NCGC00185773-02	Clindamycin palmitate	NA	4	20.931	72.748	-4.6792	s-cd47-WT_JUR-1	NCGC00185773-02	-2.4	5.2576	80.859	-5.2792	0.6	-8.111	-0.786964
s-cd47-CD47-1	NCGC00183095-01	Tigecycline	NA	4	37.2212	85.955	-4.4292	s-cd47-WT_JUR-1	NCGC00183095-01	4	18.6548	93.897	-4.7292	0.3	-7.942	-0.776652
s-cd47-CD47-1	NCGC00166310-03	Marbofloxacin	NA	4	14.818	95.745	-4.8292	s-cd47-WT_JUR-1	NCGC00166310-03	4	13.2066	103.686	-4.8792	0.05	-7.941	-0.776591
s-cd47-CD47-1	NCGC00346709-01	20-hydroxyecdysone	NA	4		95.564		s-cd47-WT_JUR-1	NCGC00346709-01	4	1.049	103.421	-5.9792	5.9792	-7.857	-0.771465
s-cd47-CD47-1	NCGC00346829-01	Fotemustine	NA	4		126.614		s-cd47-WT_JUR-1	NCGC00346829-01	4	0.0009	134.419	-9.0292	9.0292	-7.805	-0.768292
s-cd47-CD47-1	NCGC00346546-01	MK-3207	NA	4		91.647		s-cd47-WT_JUR-1	NCGC00346546-01	4	0.8333	99.449	-6.0792	6.0792	-7.802	-0.768109
s-cd47-CD47-1	NCGC00347065-01	KUC107887N-03	NA	-2.2	20.931	46.038	-4.6792	s-cd47-WT_JUR-1	NCGC00347065-01	-2.4	33.1734	53.765	-4.4792	-0.2	-7.727	-0.763533
s-cd47-CD47-1	NCGC00017244-05	Enoxolone	NA	-2.4	18.6548	87.819	-4.7292	s-cd47-WT_JUR-1	NCGC00017244-05	4	16.6261	95.476	-4.7792	0.05	-7.657	-0.759261
s-cd47-CD47-1	NCGC00094575-01	Tolterodine tartrate	NA	4	14.818	86.847	-4.8292	s-cd47-WT_JUR-1	NCGC00094575-01	4	0.0019	94.418	-8.7292	3.9	-7.571	-0.754013
s-cd47-CD47-1	NCGC00163683-02	Metenkephalin	NA	4	0.1049	115.354	-6.9792	s-cd47-WT_JUR-1	NCGC00163683-02	4	0.0074	122.915	-8.1292	1.15	-7.561	-0.753403
s-cd47-CD47-1	NCGC00167565-01	Carbazochrome sodium sulfonate	NA	4		106.478		s-cd47-WT_JUR-1	NCGC00167565-01	4		113.881		0	-7.403	-0.743762
s-cd47-CD47-1	NCGC00016991-06	Proparacaine	NA	4	0.0187	110.135	-7.7292	s-cd47-WT_JUR-1	NCGC00016991-06	4	0.3722	117.459	-6.4292	-1.3	-7.324	-0.738941
s-cd47-CD47-1	NCGC00016777-07	Probucol	NA	-2.2	16.6261	55.754	-4.7792	s-cd47-WT_JUR-1	NCGC00016777-07	-2.2	16.6261	62.951	-4.7792	0	-7.197	-0.731192
s-cd47-CD47-1	NCGC00015256-13	Chloroquine (CQ)	NA	4	0.1049	95.837	-6.9792	s-cd47-WT_JUR-1	NCGC00015256-13	4		103.018		-6.9792	-7.181	-0.730216
s-cd47-CD47-1	NCGC00167493-04	Manidipine	NA	4	3.3173	95.343	-5.4792	s-cd47-WT_JUR-1	NCGC00167493-04	4		102.501		-5.4792	-7.158	-0.728812
s-cd47-CD47-1	NCGC00164615-03	Prulifloxacin	NA	-2.2	20.931	61.203	-4.6792	s-cd47-WT_JUR-1	NCGC00164615-03	-2.2	20.931	68.294	-4.6792	0	-7.091	-0.724724
s-cd47-CD47-1	NCGC00016599-05	Flucytosine	NA	4	20.931	78.329	-4.6792	s-cd47-WT_JUR-1	NCGC00016599-05	4	20.931	85.282	-4.6792	0	-6.953	-0.716303
s-cd47-CD47-1	NCGC00345022-02	IDE-2	NA	4		105.943		s-cd47-WT_JUR-1	NCGC00345022-02	4	0.0017	112.853	-8.7792	8.7792	-6.91	-0.713679
s-cd47-CD47-1	NCGC00242512-01	methyl jasmonate	NA	4		104.078		s-cd47-WT_JUR-1	NCGC00242512-01	4	9.3495	110.817	-5.0292	5.0292	-6.739	-0.703245
s-cd47-CD47-1	NCGC00065934-06	Oxcarbazepine	NA	4	0.0833	97.295	-7.0792	s-cd47-WT_JUR-1	NCGC00065934-06	4	3.3173	103.887	-5.4792	-1.6	-6.592	-0.694275
s-cd47-CD47-1	NCGC00274068-02	Itraconazole	NA	-1.2	2.0931	88.476	-5.6792	s-cd47-WT_JUR-1	NCGC00274068-02	-1.4	1.049	95.027	-5.9792	0.3	-6.551	-0.691773
s-cd47-CD47-1	NCGC00346519-01	Teicoplanin	NA	4	0.2093	99.634	-6.6792	s-cd47-WT_JUR-1	NCGC00346519-01	4	2.3485	106.069	-5.6292	-1.05	-6.435	-0.684694
s-cd47-CD47-1	NCGC00022858-07	Sodium cromoglycate	NA	1.4	0.0021	95.85	-8.6792	s-cd47-WT_JUR-1	NCGC00022858-07	1.4	0.0019	102.267	-8.7292	0.05	-6.417	-0.683596
s-cd47-CD47-1	NCGC00163540-03	Hesperetin	NA	-1.2	11.7704	33.715	-4.9292	s-cd47-WT_JUR-1	NCGC00163540-03	-2.2	14.818	40.049	-4.8292	-0.1	-6.334	-0.678531
s-cd47-CD47-1	NCGC00347951-01	LSD1-C76	NA	4	37.2212	106.752	-4.4292	s-cd47-WT_JUR-1	NCGC00347951-01	4		113.068		-4.4292	-6.316	-0.677433
s-cd47-CD47-1	NCGC00182084-01	Clorsulon	NA	4	20.931	89.714	-4.6792	s-cd47-WT_JUR-1	NCGC00182084-01	4	14.818	96.005	-4.8292	0.15	-6.291	-0.675907
s-cd47-CD47-1	NCGC00025379-01	SR 33805	NA	-3	37.2212	64.862	-4.4292	s-cd47-WT_JUR-1	NCGC00025379-01	-3	26.3506	71.152	-4.5792	0.15	-6.29	-0.675846
s-cd47-CD47-1	NCGC00016533-14	Sulfamethoxazole	NA	4	0.8333	109.326	-6.0792	s-cd47-WT_JUR-1	NCGC00016533-14	4		115.52		-6.0792	-6.194	-0.669988
s-cd47-CD47-1	NCGC00164637-04	Nifekalant	NA	-3	37.2212	56.603	-4.4292	s-cd47-WT_JUR-1	NCGC00164637-04	-3	23.485	62.771	-4.6292	0.2	-6.168	-0.668402
s-cd47-CD47-1	NCGC00182077-02	Roxithromycin	NA	4	2.0931	93.149	-5.6792	s-cd47-WT_JUR-1	NCGC00182077-02	4	0.2635	99.282	-6.5792	0.9	-6.133	-0.666266
s-cd47-CD47-1	NCGC00167532-01	Balofloxacin	NA	-3	33.1734	64.081	-4.4792	s-cd47-WT_JUR-1	NCGC00167532-01	-2.2	16.6261	70.151	-4.7792	0.3	-6.07	-0.662422
s-cd47-CD47-1	NCGC00345082-01	KHS101	NA	-2.1	13.2066	19.543	-4.8792	s-cd47-WT_JUR-1	NCGC00345082-01	-2.2	10.4904	25.548	-4.9792	0.1	-6.005	-0.658456
s-cd47-CD47-1	NCGC00184997-01	Raltegravir	NA	4		106.047		s-cd47-WT_JUR-1	NCGC00184997-01	4	0.0166	112.049	-7.7792	7.7792	-6.002	-0.658273
s-cd47-CD47-1	NCGC00015818-15	Praziquantel	NA	4		84.135		s-cd47-WT_JUR-1	NCGC00015818-15	1.2	0.0026	90.049	-8.5792	8.5792	-5.914	-0.652903
s-cd47-CD47-1	NCGC00346518-01	Meropenem	NA	4	0.0105	102.56	-7.9792	s-cd47-WT_JUR-1	NCGC00346518-01	1.2	0.0019	108.471	-8.7292	0.75	-5.911	-0.65272
s-cd47-CD47-1	NCGC00015149-15	Bumetanide	NA	1.4	0.0372	112.579	-7.4292	s-cd47-WT_JUR-1	NCGC00015149-15	4		118.39		-7.4292	-5.811	-0.646618
s-cd47-CD47-1	NCGC00346970-01	YK-72	NA	-1.4	0.1177	84.063	-6.9292	s-cd47-WT_JUR-1	NCGC00346970-01	4	14.818	89.742	-4.8292	-2.1	-5.679	-0.638563
s-cd47-CD47-1	NCGC00017364-14	Caffeic acid	NA	-3	33.1734	21.573	-4.4792	s-cd47-WT_JUR-1	NCGC00017364-14	-2.1	20.931	27.233	-4.6792	0.2	-5.66	-0.637404
s-cd47-CD47-1	NCGC00168853-03	Lupeol	NA	4		115.454		s-cd47-WT_JUR-1	NCGC00168853-03	4		121.113		0	-5.659	-0.637343
s-cd47-CD47-1	NCGC00185071-02	Calcium folinate	NA	4		104.32		s-cd47-WT_JUR-1	NCGC00185071-02	1.4	0.001	109.901	-8.9792	8.9792	-5.581	-0.632583
s-cd47-CD47-1	NCGC00159422-02	Tiopronin	NA	4		99.584		s-cd47-WT_JUR-1	NCGC00159422-02	1.4	0.0019	105.142	-8.7292	8.7292	-5.558	-0.631179
s-cd47-CD47-1	NCGC00090808-03	Amphotericin B	NA	-1.3	0.3722	0.342	-6.4292	s-cd47-WT_JUR-1	NCGC00090808-03	-1.1	0.4686	5.855	-6.3292	-0.1	-5.513	-0.628434
s-cd47-CD47-1	NCGC00346570-01	Tebipenem pivoxil	NA	4	37.2212	79.222	-4.4292	s-cd47-WT_JUR-1	NCGC00346570-01	4	37.2212	84.717	-4.4292	0	-5.495	-0.627335
s-cd47-CD47-1	NCGC00165783-02	Vadimezan	NA	-2.4	16.6261	70.202	-4.7792	s-cd47-WT_JUR-1	NCGC00165783-02	4	0.0053	75.398	-8.2792	3.5	-5.196	-0.60909
s-cd47-CD47-1	NCGC00246387-02	Arbidol	NA	-2.2	14.818	47.594	-4.8292	s-cd47-WT_JUR-1	NCGC00246387-02	-2.2	23.485	52.672	-4.6292	-0.2	-5.078	-0.60189
s-cd47-CD47-1	NCGC00017112-11	ciclopirox	NA	-2.1	14.818	5.23	-4.8292	s-cd47-WT_JUR-1	NCGC00017112-11	-1.1	1.049	10.264	-5.9792	1.15	-5.034	-0.599205
s-cd47-CD47-1	NCGC00167472-02	Amlexanox	NA	-3	20.931	66.733	-4.6792	s-cd47-WT_JUR-1	NCGC00167472-02	4		71.713		-4.6792	-4.98	-0.59591
s-cd47-CD47-1	NCGC00015772-13	Ofloxacin	NA	4		107.679		s-cd47-WT_JUR-1	NCGC00015772-13	4		112.613		0	-4.934	-0.593103
s-cd47-CD47-1	NCGC00016488-03	Kinetin	NA	4	37.2212	102.886	-4.4292	s-cd47-WT_JUR-1	NCGC00016488-03	4	9.3495	107.655	-5.0292	0.6	-4.769	-0.583034
s-cd47-CD47-1	NCGC00016024-06	Taxifolin	NA	4	37.2212	78.091	-4.4292	s-cd47-WT_JUR-1	NCGC00016024-06	4	18.6548	82.82	-4.7292	0.3	-4.729	-0.580594
s-cd47-CD47-1	NCGC00023373-04	Clobetasol propionate	NA	1.3	0.0235	73.47	-7.6292	s-cd47-WT_JUR-1	NCGC00023373-04	-2.4	2.0931	78.142	-5.6792	-1.95	-4.672	-0.577115
s-cd47-CD47-1	NCGC00166281-02	Quinine	NA	-2.2	14.818	60.987	-4.8292	s-cd47-WT_JUR-1	NCGC00166281-02	-2.2	16.6261	65.508	-4.7792	-0.05	-4.521	-0.567901
s-cd47-CD47-1	NCGC00015462-12	Glipizide	NA	-2.2	20.931	75.606	-4.6792	s-cd47-WT_JUR-1	NCGC00015462-12	4	18.6548	80.055	-4.7292	0.05	-4.449	-0.563508
s-cd47-CD47-1	NCGC00015484-06	GBR-12935	NA	-2.1	26.3506	5.649	-4.5792	s-cd47-WT_JUR-1	NCGC00015484-06	-2.1	23.485	10.064	-4.6292	0.05	-4.415	-0.561433
s-cd47-CD47-1	NCGC00159418-02	Tegafur	NA	4	27.0412	107.62	-4.568	s-cd47-WT_JUR-1	NCGC00159418-02	4	8.5512	111.992	-5.068	0.5	-4.372	-0.558809
s-cd47-CD47-1	NCGC00346462-01	Sofosbuvir	NA	4	9.3495	119.813	-5.0292	s-cd47-WT_JUR-1	NCGC00346462-01	4	0.935	124.049	-6.0292	1	-4.236	-0.550511
s-cd47-CD47-1	NCGC00346694-01	MK-2048	NA	4	33.1734	96.023	-4.4792	s-cd47-WT_JUR-1	NCGC00346694-01	4	20.931	100.115	-4.6792	0.2	-4.092	-0.541724
s-cd47-CD47-1	NCGC00015603-07	Lomefloxacin hydrochloride	NA	4	0.1049	99.682	-6.9792	s-cd47-WT_JUR-1	NCGC00015603-07	4		103.773		-6.9792	-4.091	-0.541663
s-cd47-CD47-1	NCGC00161670-06	Pepstatin	NA	4	20.931	97.699	-4.6792	s-cd47-WT_JUR-1	NCGC00161670-06	4	9.3495	101.777	-5.0292	0.35	-4.078	-0.540869
s-cd47-CD47-1	NCGC00347957-01	UNC669	NA	4		113.958		s-cd47-WT_JUR-1	NCGC00347957-01	4	0.0019	117.923	-8.7292	8.7292	-3.965	-0.533974
s-cd47-CD47-1	NCGC00344053-01	purmorphamine	NA	-2.2	14.818	62.215	-4.8292	s-cd47-WT_JUR-1	NCGC00344053-01	-2.4	20.931	66.175	-4.6792	-0.15	-3.96	-0.533669
s-cd47-CD47-1	NCGC00183039-01	Nystatin	NA	4		107.072		s-cd47-WT_JUR-1	NCGC00183039-01	4	0.0059	110.961	-8.2292	8.2292	-3.889	-0.529337
s-cd47-CD47-1	NCGC00346708-01	Aloperine	NA	4		104.262		s-cd47-WT_JUR-1	NCGC00346708-01	4		108.108		0	-3.846	-0.526713
s-cd47-CD47-1	NCGC00015615-14	Lansoprazole	NA	4	23.485	72.782	-4.6292	s-cd47-WT_JUR-1	NCGC00015615-14	-3	23.485	76.571	-4.6292	0	-3.789	-0.523234
s-cd47-CD47-1	NCGC00346613-01	Disufenton sodium	NA	4		116.713		s-cd47-WT_JUR-1	NCGC00346613-01	4	0.8333	120.397	-6.0792	6.0792	-3.684	-0.516827
s-cd47-CD47-1	NCGC00015204-08	Carmustine	NA	4	0.4176	127.522	-6.3792	s-cd47-WT_JUR-1	NCGC00015204-08	4	0.0047	131.05	-8.3292	1.95	-3.528	-0.507308
s-cd47-CD47-1	NCGC00346512-01	BMS-707035	NA	4	37.2212	97.024	-4.4292	s-cd47-WT_JUR-1	NCGC00346512-01	4	23.485	100.463	-4.6292	0.2	-3.439	-0.501877
s-cd47-CD47-1	NCGC00095977-03	Paeonol	NA	4		102.706		s-cd47-WT_JUR-1	NCGC00095977-03	4		106.077		0	-3.371	-0.497728
s-cd47-CD47-1	NCGC00016375-10	Sulphadimethoxine	NA	4	6.619	105.987	-5.1792	s-cd47-WT_JUR-1	NCGC00016375-10	4	0.0935	109.348	-7.0292	1.85	-3.361	-0.497118
s-cd47-CD47-1	NCGC00015061-12	Aciclovir	NA	4		112.463		s-cd47-WT_JUR-1	NCGC00015061-12	4	0.0012	115.767	-8.9292	8.9292	-3.304	-0.49364
s-cd47-CD47-1	NCGC00162383-02	Vancomycin hydrochloride	NA	4	0.0166	102.34	-7.7792	s-cd47-WT_JUR-1	NCGC00162383-02	4		105.625		-7.7792	-3.285	-0.49248
s-cd47-CD47-1	NCGC00164629-03	Alibendol	NA	4	0.0526	114.756	-7.2792	s-cd47-WT_JUR-1	NCGC00164629-03	4		118.019		-7.2792	-3.263	-0.491138
s-cd47-CD47-1	NCGC00179308-05	Fluticasone propionate	NA	-3	33.1734	41.173	-4.4792	s-cd47-WT_JUR-1	NCGC00179308-05	-3	29.5659	44.419	-4.5292	0.05	-3.246	-0.4901
s-cd47-CD47-1	NCGC00025357-01	Nicorandil	NA	4	0.0418	112.408	-7.3792	s-cd47-WT_JUR-1	NCGC00025357-01	4		115.551		-7.3792	-3.143	-0.483815
s-cd47-CD47-1	NCGC00263944-01	Kanamycin	NA	4		117.642		s-cd47-WT_JUR-1	NCGC00263944-01	4	0.5258	120.758	-6.2792	6.2792	-3.116	-0.482168
s-cd47-CD47-1	NCGC00016438-05	Procarbazine hydrochloride	NA	-3	11.7704	130.725	-4.9292	s-cd47-WT_JUR-1	NCGC00016438-05	4		133.836		-4.9292	-3.111	-0.481863
s-cd47-CD47-1	NCGC00016345-09	4-methylumbelliferone	NA	4	7.4266	91.671	-5.1292	s-cd47-WT_JUR-1	NCGC00016345-09	4	0.0132	94.768	-7.8792	2.75	-3.097	-0.481008
s-cd47-CD47-1	NCGC00183867-01	Aloin	NA	4	0.0132	105.603	-7.8792	s-cd47-WT_JUR-1	NCGC00183867-01	4	0.2093	108.623	-6.6792	-1.2	-3.02	-0.47631
s-cd47-CD47-1	NCGC00178852-06	Tobramycin	NA	4	0.2957	115.478	-6.5292	s-cd47-WT_JUR-1	NCGC00178852-06	4		118.463		-6.5292	-2.985	-0.474174
s-cd47-CD47-1	NCGC00164601-03	Liranaftate	NA	-2.2	18.6548	73.137	-4.7292	s-cd47-WT_JUR-1	NCGC00164601-03	-3	37.2212	75.97	-4.4292	-0.3	-2.833	-0.464899
s-cd47-CD47-1	NCGC00346705-01	PMSF	NA	4		87.023		s-cd47-WT_JUR-1	NCGC00346705-01	4		89.849		0	-2.826	-0.464472
s-cd47-CD47-1	NCGC00094792-06	Tioguanine	NA	-1.1	0.7427	0.559	-6.1292	s-cd47-WT_JUR-1	NCGC00094792-06	-1.1	0.6619	3.163	-6.1792	0.05	-2.604	-0.450925
s-cd47-CD47-1	NCGC00159461-03	Amprenavir	NA	-3	20.931	71.582	-4.6792	s-cd47-WT_JUR-1	NCGC00159461-03	-2.4	20.931	74.138	-4.6792	0	-2.556	-0.447996
s-cd47-CD47-1	NCGC00159489-04	Chloramphenicol Palmitate	NA	4		91.382		s-cd47-WT_JUR-1	NCGC00159489-04	4	37.2212	93.898	-4.4292	4.4292	-2.516	-0.445556
s-cd47-CD47-1	NCGC00274064-01	Betamethasone valerate	NA	4	4.1763	95.491	-5.3792	s-cd47-WT_JUR-1	NCGC00274064-01	4	0.4176	97.926	-6.3792	1	-2.435	-0.440613
s-cd47-CD47-1	NCGC00015060-19	Azathioprine	NA	-1.1	1.6626	10.453	-5.7792	s-cd47-WT_JUR-1	NCGC00015060-19	-1.1	1.4818	12.76	-5.8292	0.05	-2.307	-0.432802
s-cd47-CD47-1	NCGC00159360-02	Betamethasone dipropionate	NA	-2.4	16.6261	73.698	-4.7792	s-cd47-WT_JUR-1	NCGC00159360-02	-2.4	6.619	75.827	-5.1792	0.4	-2.129	-0.421941
s-cd47-CD47-1	NCGC00263564-02	Levosimendan	NA	-2.1	18.6548	1.177	-4.7292	s-cd47-WT_JUR-1	NCGC00263564-02	-2.1	29.5659	3.235	-4.5292	-0.2	-2.058	-0.417608
s-cd47-CD47-1	NCGC00094994-06	Mefloquine	NA	-2.1	20.931	2.912	-4.6792	s-cd47-WT_JUR-1	NCGC00094994-06	-2.1	20.931	4.962	-4.6792	0	-2.05	-0.41712
s-cd47-CD47-1	NCGC00095164-05	Protionamide	NA	4		95.235		s-cd47-WT_JUR-1	NCGC00095164-05	4	0.0264	97.242	-7.5792	7.5792	-2.007	-0.414496
s-cd47-CD47-1	NCGC00015970-10	Sulindac	NA	-2.1	9.3495	44.186	-5.0292	s-cd47-WT_JUR-1	NCGC00015970-10	-2.2	18.6548	46.16	-4.7292	-0.3	-1.974	-0.412483
s-cd47-CD47-1	NCGC00346610-01	Pantothenic acid	NA	4	11.7704	106.673	-4.9292	s-cd47-WT_JUR-1	NCGC00346610-01	4		108.64		-4.9292	-1.967	-0.412055
s-cd47-CD47-1	NCGC00160519-02	Acipimox	NA	4	0.8333	116.576	-6.0792	s-cd47-WT_JUR-1	NCGC00160519-02	4		118.489		-6.0792	-1.913	-0.40876
s-cd47-CD47-1	NCGC00159438-02	L-selenomethionine	NA	4	0.0191	91.538	-7.718	s-cd47-WT_JUR-1	NCGC00159438-02	4	10.7653	93.403	-4.968	-2.75	-1.865	-0.405831
s-cd47-CD47-1	NCGC00095264-05	Chloroxine	NA	-2.1	16.6261	9.224	-4.7792	s-cd47-WT_JUR-1	NCGC00095264-05	-1.1	7.4266	11.052	-5.1292	0.35	-1.828	-0.403574
s-cd47-CD47-1	NCGC00167490-02	Lumefantrine	NA	-2.1	16.6261	4.134	-4.7792	s-cd47-WT_JUR-1	NCGC00167490-02	-2.1	18.6548	5.944	-4.7292	-0.05	-1.81	-0.402475
s-cd47-CD47-1	NCGC00091011-09	Chloramphenicol	NA	4	0.059	107.274	-7.2292	s-cd47-WT_JUR-1	NCGC00091011-09	4		109.043		-7.2292	-1.769	-0.399973
s-cd47-CD47-1	NCGC00015242-12	Chlorothiazide	NA	4		105.569		s-cd47-WT_JUR-1	NCGC00015242-12	4	11.7704	107.228	-4.9292	4.9292	-1.659	-0.393261
s-cd47-CD47-1	NCGC00247785-05	KUC109088N-03	NA	-2.1	16.6261	0.278	-4.7792	s-cd47-WT_JUR-1	NCGC00247785-05	-2.1	20.931	1.916	-4.6792	-0.1	-1.638	-0.39198
s-cd47-CD47-1	NCGC00347066-01	KUC105555N-02	NA	-2.1	16.6261	-1.1	-4.7792	s-cd47-WT_JUR-1	NCGC00347066-01	-2.1	20.931	0.469	-4.6792	-0.1	-1.569	-0.387769
s-cd47-CD47-1	NCGC00347064-01	KUC107871N-04	NA	-1.1	2.9566	-0.776	-5.5292	s-cd47-WT_JUR-1	NCGC00347064-01	-1.1	2.9566	0.771	-5.5292	0	-1.547	-0.386427
s-cd47-CD47-1	NCGC00015819-11	Propafenone	NA	4	20.931	76.123	-4.6792	s-cd47-WT_JUR-1	NCGC00015819-11	4	33.1734	77.619	-4.4792	-0.2	-1.496	-0.383315
s-cd47-CD47-1	NCGC00346665-01	Scopine	NA	-2.1	23.485	1.197	-4.6292	s-cd47-WT_JUR-1	NCGC00346665-01	-2.1	26.3506	2.632	-4.5792	-0.05	-1.435	-0.379593
s-cd47-CD47-1	NCGC00344622-02	SGC0946	NA	-2.1	23.485	-0.745	-4.6292	s-cd47-WT_JUR-1	NCGC00344622-02	-3	29.5659	0.65	-4.5292	-0.1	-1.395	-0.377152
s-cd47-CD47-1	NCGC00347958-01	WS3	NA	-1.1	0.4686	-1.451	-6.3292	s-cd47-WT_JUR-1	NCGC00347958-01	-1.1	0.4686	-0.057	-6.3292	0	-1.394	-0.377091
s-cd47-CD47-1	NCGC00165815-05	NSC-724771	NA	-1.1	3.3173	1.433	-5.4792	s-cd47-WT_JUR-1	NCGC00165815-05	-1.1	1.3207	2.652	-5.8792	0.4	-1.219	-0.366412
s-cd47-CD47-1	NCGC00094419-06	TPCK	NA	-2.1	13.2066	0.529	-4.8792	s-cd47-WT_JUR-1	NCGC00094419-06	-1.1	9.3495	1.72	-5.0292	0.15	-1.191	-0.364704
s-cd47-CD47-1	NCGC00346591-01	Rotundine	NA	-3	33.1734	79.465	-4.4792	s-cd47-WT_JUR-1	NCGC00346591-01	-2.4	33.1734	80.651	-4.4792	0	-1.186	-0.364398
s-cd47-CD47-1	NCGC00347286-01	GSK126	NA	-2.1	20.931	-1.004	-4.6792	s-cd47-WT_JUR-1	NCGC00347286-01	-3	33.1734	0.167	-4.4792	-0.2	-1.171	-0.363483
s-cd47-CD47-1	NCGC00015925-13	Sulfaphenazole	NA	1.4	0.0094	120.265	-8.0292	s-cd47-WT_JUR-1	NCGC00015925-13	4		121.42		-8.0292	-1.155	-0.362507
s-cd47-CD47-1	NCGC00346529-01	Safinamide mesilate	NA	-1.1	5.8992	1.295	-5.2292	s-cd47-WT_JUR-1	NCGC00346529-01	-1.1	7.4266	2.398	-5.1292	-0.1	-1.103	-0.359334
s-cd47-CD47-1	NCGC00091112-08	Methylrosaniline chloride	NA	-2.1	1.3207	-1.971	-5.8792	s-cd47-WT_JUR-1	NCGC00091112-08	-1.1	0.2348	-0.946	-6.6292	0.75	-1.025	-0.354574
s-cd47-CD47-1	NCGC00015300-05	Vanoxeamine	NA	-2.1	16.6261	1.142	-4.7792	s-cd47-WT_JUR-1	NCGC00015300-05	-2.1	16.6261	2.06	-4.7792	0	-0.918	-0.348045
s-cd47-CD47-1	NCGC00346524-01	Nanchangmycin	NA	-1.1	1.4818	0.231	-5.8292	s-cd47-WT_JUR-1	NCGC00346524-01	-1.1	0.6619	1.142	-6.1792	0.35	-0.911	-0.347618
s-cd47-CD47-1	NCGC00346606-01	Cyclovirobuxin D	NA	1.4	0.0026	93.359	-8.5792	s-cd47-WT_JUR-1	NCGC00346606-01	1.4	0.0023	94.262	-8.6292	0.05	-0.903	-0.34713
s-cd47-CD47-1	NCGC00162409-03	Bafilomycin A1	NA	-1.1	0.0094	0.977	-8.0292	s-cd47-WT_JUR-1	NCGC00162409-03	-1.1	0.0042	1.818	-8.3792	0.35	-0.841	-0.343346
s-cd47-CD47-1	NCGC00346938-01	E5555	NA	-2.1	16.6261	0.663	-4.7792	s-cd47-WT_JUR-1	NCGC00346938-01	-2.1	14.818	1.486	-4.8292	0.05	-0.823	-0.342248
s-cd47-CD47-1	NCGC00346669-01	TAK-875	NA	-2.2	18.6548	57.859	-4.7292	s-cd47-WT_JUR-1	NCGC00346669-01	-2.4	18.6548	58.652	-4.7292	0	-0.793	-0.340417
s-cd47-CD47-1	NCGC00346476-01	Telotristat etiprate	NA	-2.1	23.485	2.237	-4.6292	s-cd47-WT_JUR-1	NCGC00346476-01	-2.1	18.6548	2.992	-4.7292	0.1	-0.755	-0.338099
s-cd47-CD47-1	NCGC00346531-01	Oligomycin A	NA	-2.1	16.6261	3.663	-4.7792	s-cd47-WT_JUR-1	NCGC00346531-01	-2.1	16.6261	4.411	-4.7792	0	-0.748	-0.337672
s-cd47-CD47-1	NCGC00346712-01	Verteporfin	NA	-1.1	0.2093	3.003	-6.6792	s-cd47-WT_JUR-1	NCGC00346712-01	-1.1	0.7427	3.742	-6.1292	-0.55	-0.739	-0.337122
s-cd47-CD47-1	NCGC00262598-01	Cisatracurium besylate	NA	1.4	0.0009	98.782	-9.0342	s-cd47-WT_JUR-1	NCGC00262598-01	4	0.0021	99.502	-8.6842	-0.35	-0.72	-0.335963
s-cd47-CD47-1	NCGC00346523-01	Azalomycin-B	NA	-1.1	0.7427	2.03	-6.1292	s-cd47-WT_JUR-1	NCGC00346523-01	-1.1	0.6619	2.716	-6.1792	0.05	-0.686	-0.333888
s-cd47-CD47-1	NCGC00014926-03	Carboxyamidotriazole	NA	-2.1	20.931	35.615	-4.6792	s-cd47-WT_JUR-1	NCGC00014926-03	-3	33.1734	36.161	-4.4792	-0.2	-0.546	-0.325345
s-cd47-CD47-1	NCGC00346533-01	Daclatasvir dihydrochloride	NA	1.3	0.0235	3.015	-7.6292	s-cd47-WT_JUR-1	NCGC00346533-01	-3	29.5659	3.544	-4.5292	-3.1	-0.529	-0.324308
s-cd47-CD47-1	NCGC00016244-14	Isoniazid	NA	-2.2	13.2066	81.355	-4.8792	s-cd47-WT_JUR-1	NCGC00016244-14	-3	37.2212	81.801	-4.4292	-0.45	-0.446	-0.319243
s-cd47-CD47-1	NCGC00346971-01	Double JS-K	NA	-2.1	14.818	4.122	-4.8292	s-cd47-WT_JUR-1	NCGC00346971-01	-1.1	8.3328	4.561	-5.0792	0.25	-0.439	-0.318816
s-cd47-CD47-1	NCGC00016408-10	Sulfapyridine	NA	4		119.362		s-cd47-WT_JUR-1	NCGC00016408-10	4		119.591		0	-0.229	-0.306002
s-cd47-CD47-1	NCGC00186028-01	Levetiracetam	NA	4	7.4266	96.863	-5.1292	s-cd47-WT_JUR-1	NCGC00186028-01	4	18.6548	97.064	-4.7292	-0.4	-0.201	-0.304293
s-cd47-CD47-1	NCGC00346738-01	Pregabalin	NA	4	0.0033	108.013	-8.4792	s-cd47-WT_JUR-1	NCGC00346738-01	4		108.21		-8.4792	-0.197	-0.304049
s-cd47-CD47-1	NCGC00094889-05	Fumalic acid	NA	4	5.2576	80.123	-5.2792	s-cd47-WT_JUR-1	NCGC00094889-05	4	0.0033	80.316	-8.4792	3.2	-0.193	-0.303805
s-cd47-CD47-1	NCGC00160165-01	(+)-Usniacin	NA	1.3	0.1321	95.795	-6.8792	s-cd47-WT_JUR-1	NCGC00160165-01	4	0.0372	95.92	-7.4292	0.55	-0.125	-0.299656
s-cd47-CD47-1	NCGC00174736-02	Uridine triacetate	NA	4		96.926		s-cd47-WT_JUR-1	NCGC00174736-02	4	0.0094	97.02	-8.0292	8.0292	-0.094	-0.297764
s-cd47-CD47-1	NCGC00186013-01	Esomeprazole magnesium	NA	4		79.276		s-cd47-WT_JUR-1	NCGC00186013-01	4	0.001	79.369	-8.9792	8.9792	-0.093	-0.297703
s-cd47-CD47-1	NCGC00167971-03	Tiotropium bromide	NA	4	0.0526	111.345	-7.2792	s-cd47-WT_JUR-1	NCGC00167971-03	4	6.619	111.42	-5.1792	-2.1	-0.075	-0.296605
s-cd47-CD47-1	NCGC00025155-01	Omacetaxine mepesuccinate	NA	4	37.2212	93.302	-4.4292	s-cd47-WT_JUR-1	NCGC00025155-01	4	16.6261	93.235	-4.7792	0.35	0.067	-0.28794
s-cd47-CD47-1	NCGC00021191-05	Cortisone acetate	NA	4		101.049		s-cd47-WT_JUR-1	NCGC00021191-05	4	0.3317	100.926	-6.4792	6.4792	0.123	-0.284523
s-cd47-CD47-1	NCGC00016927-10	Enoxacin	NA	1.4	0.0019	104.064	-8.7292	s-cd47-WT_JUR-1	NCGC00016927-10	1.2	0.0019	103.842	-8.7292	0	0.222	-0.278482
s-cd47-CD47-1	NCGC00188943-04	Orotic acid	NA	4	11.7704	101.62	-4.9292	s-cd47-WT_JUR-1	NCGC00188943-04	4		101.283		-4.9292	0.337	-0.271464
s-cd47-CD47-1	NCGC00018261-05	Perhexiline	NA	-2.1	18.6548	4.445	-4.7292	s-cd47-WT_JUR-1	NCGC00018261-05	-2.1	20.931	4.078	-4.6792	-0.05	0.367	-0.269634
s-cd47-CD47-1	NCGC00346710-01	Bindarit	NA	-3	37.2212	61.743	-4.4292	s-cd47-WT_JUR-1	NCGC00346710-01	-2.2	20.931	61.357	-4.6792	0.25	0.386	-0.268474
s-cd47-CD47-1	NCGC00095460-06	Hematoxylin	NA	-3	16.6261	86.332	-4.7792	s-cd47-WT_JUR-1	NCGC00095460-06	4	20.931	85.813	-4.6792	-0.1	0.519	-0.260359
s-cd47-CD47-1	NCGC00163169-02	Pizotifen	NA	4	37.2212	91.174	-4.4292	s-cd47-WT_JUR-1	NCGC00163169-02	4	37.2212	90.612	-4.4292	0	0.562	-0.257735
s-cd47-CD47-1	NCGC00168773-01	Darunavir	NA	-1.2	10.4904	66.343	-4.9792	s-cd47-WT_JUR-1	NCGC00168773-01	-1.2	10.4904	65.744	-4.9792	0	0.599	-0.255477
s-cd47-CD47-1	NCGC00253713-02	Fenticonazole nitrate	NA	-2.1	16.6261	4.358	-4.7792	s-cd47-WT_JUR-1	NCGC00253713-02	-2.1	18.6548	3.71	-4.7292	-0.05	0.648	-0.252487
s-cd47-CD47-1	NCGC00181771-01	Ibutilide fumarate	NA	-3	37.2212	57.397	-4.4292	s-cd47-WT_JUR-1	NCGC00181771-01	-3	26.3506	56.736	-4.5792	0.15	0.661	-0.251694
s-cd47-CD47-1	NCGC00142605-03	Salicin	NA	4	18.6548	91.35	-4.7292	s-cd47-WT_JUR-1	NCGC00142605-03	4		90.635		-4.7292	0.715	-0.248399
s-cd47-CD47-1	NCGC00179034-08	Pentamidine isethionate	NA	-2.2	20.931	41.451	-4.6792	s-cd47-WT_JUR-1	NCGC00179034-08	-2.2	16.6261	40.734	-4.7792	0.1	0.717	-0.248277
s-cd47-CD47-1	NCGC00346538-01	Natamycin	NA	-1.2	1.177	59.042	-5.9292	s-cd47-WT_JUR-1	NCGC00346538-01	-1.2	1.4818	58.244	-5.8292	-0.1	0.798	-0.243334
s-cd47-CD47-1	NCGC00165770-03	Cardiogenol	NA	1.2	0.0026	99.654	-8.5792	s-cd47-WT_JUR-1	NCGC00165770-03	1.2	0.0026	98.851	-8.5792	0	0.803	-0.243029
s-cd47-CD47-1	NCGC00095707-03	Solanesol	NA	4	3.3173	115.253	-5.4792	s-cd47-WT_JUR-1	NCGC00095707-03	4		114.408		-5.4792	0.845	-0.240466
s-cd47-CD47-1	NCGC00090686-10	Nitrofurazone	NA	-2.2	18.6548	56.399	-4.7292	s-cd47-WT_JUR-1	NCGC00090686-10	-3	23.485	55.521	-4.6292	-0.1	0.878	-0.238452
s-cd47-CD47-1	NCGC00017312-03	Uridine	NA	4		109.494		s-cd47-WT_JUR-1	NCGC00017312-03	4	3.7221	108.587	-5.4292	5.4292	0.907	-0.236683
s-cd47-CD47-1	NCGC00022612-10	Cefaclor	NA	4	2.3485	104.273	-5.6292	s-cd47-WT_JUR-1	NCGC00022612-10	4		103.225		-5.6292	1.048	-0.228079
s-cd47-CD47-1	NCGC00015834-11	Primidone	NA	-3	33.1734	5.223	-4.4792	s-cd47-WT_JUR-1	NCGC00015834-11	-3	33.1734	4.162	-4.4792	0	1.061	-0.227286
s-cd47-CD47-1	NCGC00017323-07	Tetracycline hydrochloride	NA	-2.2	16.6261	65.993	-4.7792	s-cd47-WT_JUR-1	NCGC00017323-07	-2.2	16.6261	64.91	-4.7792	0	1.083	-0.225943
s-cd47-CD47-1	NCGC00013724-01	Methscopolamine bromide	NA	4		115.855		s-cd47-WT_JUR-1	NCGC00013724-01	4		114.723		0	1.132	-0.222953
s-cd47-CD47-1	NCGC00346443-01	Rupintrivir	NA	1.3	0.0118	113.772	-7.9292	s-cd47-WT_JUR-1	NCGC00346443-01	1.4	0.0017	112.607	-8.7792	0.85	1.165	-0.22094
s-cd47-CD47-1	NCGC00344623-02	UNC1215	NA	4		118.473		s-cd47-WT_JUR-1	NCGC00344623-02	4		117.294		0	1.179	-0.220085
s-cd47-CD47-1	NCGC00179596-04	Butoconazole nitrate	NA	-2.1	18.6548	5.308	-4.7292	s-cd47-WT_JUR-1	NCGC00179596-04	-2.1	20.931	4.107	-4.6792	-0.05	1.201	-0.218743
s-cd47-CD47-1	NCGC00346732-01	Hydroxocobalamin	NA	-2.4	8.3328	72.664	-5.0792	s-cd47-WT_JUR-1	NCGC00346732-01	-2.4	23.485	71.408	-4.6292	-0.45	1.256	-0.215387
s-cd47-CD47-1	NCGC00346737-01	Genistin	NA	-1.2	9.3495	31.195	-5.0292	s-cd47-WT_JUR-1	NCGC00346737-01	-1.2	10.4904	29.836	-4.9792	-0.05	1.359	-0.209102
s-cd47-CD47-1	NCGC00162094-04	Betamethasone	NA	-2.2	20.931	47.615	-4.6792	s-cd47-WT_JUR-1	NCGC00162094-04	-3	33.1734	46.25	-4.4792	-0.2	1.365	-0.208736
s-cd47-CD47-1	NCGC00262545-02	Vitamin B12	NA	4	1.818	87.843	-5.7404	s-cd47-WT_JUR-1	NCGC00262545-02	4		86.414		-5.7404	1.429	-0.20483
s-cd47-CD47-1	NCGC00168785-02	Diclazuril	NA	-2.2	18.6548	60.253	-4.7292	s-cd47-WT_JUR-1	NCGC00168785-02	-2.2	29.5659	58.773	-4.5292	-0.2	1.48	-0.201718
s-cd47-CD47-1	NCGC00164561-03	Zanamivir	NA	4	2.9566	107.797	-5.5292	s-cd47-WT_JUR-1	NCGC00164561-03	4		106.096		-5.5292	1.701	-0.188233
s-cd47-CD47-1	NCGC00345818-01	Ximelagatran	NA	1.4	0.0021	111.688	-8.6792	s-cd47-WT_JUR-1	NCGC00345818-01	4	0.003	109.908	-8.5292	-0.15	1.78	-0.183412
s-cd47-CD47-1	NCGC00015888-04	Reserpine	NA	-2.1	26.3506	4.934	-4.5792	s-cd47-WT_JUR-1	NCGC00015888-04	-3	29.5659	3.093	-4.5292	-0.05	1.841	-0.17969
s-cd47-CD47-1	NCGC00015673-08	Minoxidil	NA	4		106.884		s-cd47-WT_JUR-1	NCGC00015673-08	4	0.0094	105.014	-8.0292	8.0292	1.87	-0.17792
s-cd47-CD47-1	NCGC00164353-03	Mannitol	NA	4		116.152		s-cd47-WT_JUR-1	NCGC00164353-03	4	0.0059	114.104	-8.2292	8.2292	2.048	-0.167059
s-cd47-CD47-1	NCGC00095089-11	Fluconazole	NA	4		104.332		s-cd47-WT_JUR-1	NCGC00095089-11	4	9.3495	102.19	-5.0292	5.0292	2.142	-0.161323
s-cd47-CD47-1	NCGC00161641-04	Sinomenine	NA	-2.2	14.818	38.147	-4.8292	s-cd47-WT_JUR-1	NCGC00161641-04	-2.2	23.485	36	-4.6292	-0.2	2.147	-0.161018
s-cd47-CD47-1	NCGC00179578-04	Mometasone furoate	NA	-2.3	10.4904	5.101	-4.9792	s-cd47-WT_JUR-1	NCGC00179578-04	-2.1	13.2066	2.826	-4.8792	-0.1	2.275	-0.153207
s-cd47-CD47-1	NCGC00347285-01	MI-2	NA	-2.2	13.2066	64.364	-4.8792	s-cd47-WT_JUR-1	NCGC00347285-01	-2.2	18.6548	61.953	-4.7292	-0.15	2.411	-0.144908
s-cd47-CD47-1	NCGC00167466-03	Lomustine	NA	4		137.301		s-cd47-WT_JUR-1	NCGC00167466-03	4		134.88		0	2.421	-0.144298
s-cd47-CD47-1	NCGC00344511-02	SB12111	NA	-2.2	8.3328	33.621	-5.0792	s-cd47-WT_JUR-1	NCGC00344511-02	-2.2	16.6261	31.17	-4.7792	-0.3	2.451	-0.142467
s-cd47-CD47-1	NCGC00346664-01	Paeoniflorin	NA	4	0.6619	113.227	-6.1792	s-cd47-WT_JUR-1	NCGC00346664-01	4	0.0743	110.751	-7.1292	0.95	2.476	-0.140942
s-cd47-CD47-1	NCGC00346515-01	Biapenem	NA	4	2.8813	103.672	-5.5404	s-cd47-WT_JUR-1	NCGC00346515-01	4	9.1114	101.187	-5.0404	-0.5	2.485	-0.140393
s-cd47-CD47-1	NCGC00016268-09	Niacin	NA	4	0.0059	105.101	-8.2292	s-cd47-WT_JUR-1	NCGC00016268-09	4	37.2212	102.559	-4.4292	-3.8	2.542	-0.136915
s-cd47-CD47-1	NCGC00015997-06	Taurine	NA	4	0.0037	106.809	-8.4292	s-cd47-WT_JUR-1	NCGC00015997-06	4		104.259		-8.4292	2.55	-0.136426
s-cd47-CD47-1	NCGC00181166-01	Mesna	NA	4	0.0053	111.634	-8.2792	s-cd47-WT_JUR-1	NCGC00181166-01	4	0.0037	109.048	-8.4292	0.15	2.586	-0.13423
s-cd47-CD47-1	NCGC00016241-11	Furosemide	NA	4		95.049		s-cd47-WT_JUR-1	NCGC00016241-11	4	1.3207	92.422	-5.8792	5.8792	2.627	-0.131728
s-cd47-CD47-1	NCGC00015442-16	Fluorouracil	NA	-1.2	5.2576	61.785	-5.2792	s-cd47-WT_JUR-1	NCGC00015442-16	-2.2	20.931	59.07	-4.6792	-0.6	2.715	-0.126358
s-cd47-CD47-1	NCGC00346734-01	Betanin	NA	4	0.0372	103.283	-7.4292	s-cd47-WT_JUR-1	NCGC00346734-01	4	4.6859	100.5	-5.3292	-2.1	2.783	-0.122209
s-cd47-CD47-1	NCGC00177995-04	Sarafloxacin hydrochloride	NA	4		98.801		s-cd47-WT_JUR-1	NCGC00177995-04	4	7.4266	95.904	-5.1292	5.1292	2.897	-0.115252
s-cd47-CD47-1	NCGC00159491-05	Rimantadine	NA	4		104.254		s-cd47-WT_JUR-1	NCGC00159491-05	4		101.283		0	2.971	-0.110737
s-cd47-CD47-1	NCGC00346667-01	Lornoxicam	NA	-1.2	10.4904	49.35	-4.9792	s-cd47-WT_JUR-1	NCGC00346667-01	-2.2	13.2066	46.338	-4.8792	-0.1	3.012	-0.108235
s-cd47-CD47-1	NCGC00093706-05	Cephalexin	NA	4		104.373		s-cd47-WT_JUR-1	NCGC00093706-05	4		101.306		0	3.067	-0.104879
s-cd47-CD47-1	NCGC00344512-01	Cyprodime	NA	4		115.03		s-cd47-WT_JUR-1	NCGC00344512-01	4	0.001	111.925	-8.9792	8.9792	3.105	-0.10256
s-cd47-CD47-1	NCGC00163620-02	Sclareolide	NA	4	1.4818	107.766	-5.8292	s-cd47-WT_JUR-1	NCGC00163620-02	4	13.2066	104.463	-4.8792	-0.95	3.303	-0.0904781
s-cd47-CD47-1	NCGC00018099-10	Dyphylline	NA	4		117.105		s-cd47-WT_JUR-1	NCGC00018099-10	4		113.769		0	3.336	-0.0884644
s-cd47-CD47-1	NCGC00346715-01	Azomycin	NA	4	33.1734	91.671	-4.4792	s-cd47-WT_JUR-1	NCGC00346715-01	4	16.6261	88.327	-4.7792	0.3	3.344	-0.0879762
s-cd47-CD47-1	NCGC00095157-06	Oxfendazole	NA	-1.3	0.0332	20.353	-7.4792	s-cd47-WT_JUR-1	NCGC00095157-06	-1.1	6.619	16.976	-5.1792	-2.3	3.377	-0.0859626
s-cd47-CD47-1	NCGC00186464-02	Aliskiren hemifumarate	NA	4	0.0094	101.525	-8.0292	s-cd47-WT_JUR-1	NCGC00186464-02	4	0.0059	98.081	-8.2292	0.2	3.444	-0.0818742
s-cd47-CD47-1	NCGC00164569-03	Capecitabine	NA	4		89.972		s-cd47-WT_JUR-1	NCGC00164569-03	4	18.6548	86.46	-4.7292	4.7292	3.512	-0.0777248
s-cd47-CD47-1	NCGC00345813-01	Icaritin	NA	-2.1	16.6261	13.255	-4.7792	s-cd47-WT_JUR-1	NCGC00345813-01	-1.1	10.4904	9.73	-4.9792	0.2	3.525	-0.0769315
s-cd47-CD47-1	NCGC00346992-01	Purfalcamine	NA	4		108.234		s-cd47-WT_JUR-1	NCGC00346992-01	4	0.5899	104.607	-6.2292	6.2292	3.627	-0.0707075
s-cd47-CD47-1	NCGC00179454-04	Monensin sodium salt	NA	-1.2	0.645	43.12	-6.1904	s-cd47-WT_JUR-1	NCGC00179454-04	-1.2	0.2568	39.455	-6.5904	0.4	3.665	-0.0683887
s-cd47-CD47-1	NCGC00016612-04	Sulfadoxine	NA	4		105.743		s-cd47-WT_JUR-1	NCGC00016612-04	4		101.905		0	3.838	-0.0578322
s-cd47-CD47-1	NCGC00159460-02	Indinavir	NA	4		7.892		s-cd47-WT_JUR-1	NCGC00159460-02	-1.1	8.3328	4.039	-5.0792	5.0792	3.853	-0.0569169
s-cd47-CD47-1	NCGC00344764-01	CPI-613	NA	4		116.265		s-cd47-WT_JUR-1	NCGC00344764-01	4	0.8333	112.372	-6.0792	6.0792	3.893	-0.0544761
s-cd47-CD47-1	NCGC00346623-01	BMS-378806	NA	4	18.6548	93.068	-4.7292	s-cd47-WT_JUR-1	NCGC00346623-01	4	14.818	89.144	-4.8292	0.1	3.924	-0.0525844
s-cd47-CD47-1	NCGC00018258-09	Econazole nitrate	NA	-2.2	23.485	39.016	-4.6292	s-cd47-WT_JUR-1	NCGC00018258-09	-2.4	23.485	34.987	-4.6292	0	4.029	-0.0461773
s-cd47-CD47-1	NCGC00022735-07	Methylprednisolone	NA	4	0.0074	99.005	-8.1292	s-cd47-WT_JUR-1	NCGC00022735-07	4	0.2348	94.927	-6.6292	-1.5	4.078	-0.0431873
s-cd47-CD47-1	NCGC00246187-02	Pyronaridine	NA	-2.2	18.6548	46.157	-4.7292	s-cd47-WT_JUR-1	NCGC00246187-02	-2.2	18.6548	42.073	-4.7292	0	4.084	-0.0428212
s-cd47-CD47-1	NCGC00016245-01	Scopolamine	NA	4		111.934		s-cd47-WT_JUR-1	NCGC00016245-01	4	0.557	107.747	-6.2542	6.2542	4.187	-0.0365361
s-cd47-CD47-1	NCGC00015708-17	Maprotiline hydrochloride	NA	-2.1	23.485	7.77	-4.6292	s-cd47-WT_JUR-1	NCGC00015708-17	-2.1	26.3506	3.518	-4.5792	-0.05	4.252	-0.0325697
s-cd47-CD47-1	NCGC00346651-01	Nepicastat hydrochloride	NA	-3	33.1734	9.961	-4.4792	s-cd47-WT_JUR-1	NCGC00346651-01	-2.1	23.485	5.694	-4.6292	0.15	4.267	-0.0316544
s-cd47-CD47-1	NCGC00015096-11	Amiodarone	NA	-2.2	18.6548	38.936	-4.7292	s-cd47-WT_JUR-1	NCGC00015096-11	-2.2	18.6548	34.522	-4.7292	0	4.414	-0.0226844
s-cd47-CD47-1	NCGC00015482-05	Gallamine triethiodide	NA	4	3.3173	102.585	-5.4792	s-cd47-WT_JUR-1	NCGC00015482-05	4	26.3506	98.16	-4.5792	-0.9	4.425	-0.0220132
s-cd47-CD47-1	NCGC00182965-04	Biperiden	NA	4	0.0166	117.264	-7.7792	s-cd47-WT_JUR-1	NCGC00182965-04	4	0.2957	112.789	-6.5292	-1.25	4.475	-0.0189622
s-cd47-CD47-1	NCGC00346884-01	Eeyarestatin I	NA	-1.1	9.3495	5.406	-5.0292	s-cd47-WT_JUR-1	NCGC00346884-01	-1.1	7.4266	0.911	-5.1292	0.1	4.495	-0.0177418
s-cd47-CD47-1	NCGC00347067-01	KUC111774N-03	NA	-1.2	1.8655	58.072	-5.7292	s-cd47-WT_JUR-1	NCGC00347067-01	-1.2	2.9566	53.532	-5.5292	-0.2	4.54	-0.0149959
s-cd47-CD47-1	NCGC00163127-05	Acitretin	NA	-2.4	5.8992	91.272	-5.2292	s-cd47-WT_JUR-1	NCGC00163127-05	-2.2	13.2066	86.652	-4.8792	-0.35	4.62	-0.0101143
s-cd47-CD47-1	NCGC00346598-01	Shikimic acid	NA	4		117.139		s-cd47-WT_JUR-1	NCGC00346598-01	4	3.3173	112.444	-5.4792	5.4792	4.695	-0.00553773
s-cd47-CD47-1	NCGC00346575-01	Dabigatran	NA	4	0.0005	120.364	-9.2904	s-cd47-WT_JUR-1	NCGC00346575-01	4	0.0005	115.627	-9.2904	0	4.737	-0.00297487
s-cd47-CD47-1	NCGC00346520-01	Bimatoprost	NA	4	11.7704	103.945	-4.9292	s-cd47-WT_JUR-1	NCGC00346520-01	4	37.2212	98.899	-4.4292	-0.5	5.046	0.0158804
s-cd47-CD47-1	NCGC00263694-01	Kartogenin	NA	4	23.485	100.641	-4.6292	s-cd47-WT_JUR-1	NCGC00263694-01	4	23.485	95.539	-4.6292	0	5.102	0.0192976
s-cd47-CD47-1	NCGC00346838-01	Secoisolariciresinol	NA	-1.1	1.177	8.393	-5.9292	s-cd47-WT_JUR-1	NCGC00346838-01	-1.1	2.6351	3.283	-5.5792	-0.35	5.11	0.0197857
s-cd47-CD47-1	NCGC00095133-04	Famciclovir	NA	4	0.0418	122.066	-7.3792	s-cd47-WT_JUR-1	NCGC00095133-04	4		116.917		-7.3792	5.149	0.0221655
s-cd47-CD47-1	NCGC00163470-09	FK-506	NA	-1.2	0.935	51.548	-6.0292	s-cd47-WT_JUR-1	NCGC00163470-09	-1.1	1.4818	46.351	-5.8292	-0.2	5.197	0.0250945
s-cd47-CD47-1	NCGC00016855-11	Fenbendazole	NA	-2.1	2.0931	11.093	-5.6792	s-cd47-WT_JUR-1	NCGC00016855-11	-1.1	0.5899	5.5	-6.2292	0.55	5.593	0.0492586
s-cd47-CD47-1	NCGC00161834-01	Budesonide	NA	-2.2	20.931	82.984	-4.6792	s-cd47-WT_JUR-1	NCGC00161834-01	-2.2	14.818	77.338	-4.8292	0.15	5.646	0.0524926
s-cd47-CD47-1	NCGC00166125-01	Meglumine	NA	4	2.3485	114.794	-5.6292	s-cd47-WT_JUR-1	NCGC00166125-01	4		109.142		-5.6292	5.652	0.0528588
s-cd47-CD47-1	NCGC00344506-01	Manoalide	NA	4	0.4686	92.125	-6.3292	s-cd47-WT_JUR-1	NCGC00344506-01	4	2.6351	86.468	-5.5792	-0.75	5.657	0.0531639
s-cd47-CD47-1	NCGC00015767-09	Oxybutynin chloride	NA	4	0.0187	99.094	-7.7292	s-cd47-WT_JUR-1	NCGC00015767-09	4	0.0059	93.278	-8.2292	0.5	5.816	0.0628661
s-cd47-CD47-1	NCGC00164296-03	3-indolebutyric acid	NA	4	3.7221	100.811	-5.4292	s-cd47-WT_JUR-1	NCGC00164296-03	4	0.4176	94.91	-6.3792	0.95	5.901	0.0680528
s-cd47-CD47-1	NCGC00183130-01	Ritonavir	NA	-2.2	20.931	32.381	-4.6792	s-cd47-WT_JUR-1	NCGC00183130-01	-2.2	23.485	26.227	-4.6292	-0.05	6.154	0.083491
s-cd47-CD47-1	NCGC00188429-01	Acitazanolast	NA	1.4	0.0021	111.539	-8.6792	s-cd47-WT_JUR-1	NCGC00188429-01	4	0.0037	105.306	-8.4292	-0.25	6.233	0.0883116
s-cd47-CD47-1	NCGC00346968-01	JS-65-103	NA	-2.1	26.3506	10.887	-4.5792	s-cd47-WT_JUR-1	NCGC00346968-01	-1.1	10.4904	4.523	-4.9792	0.4	6.364	0.0963053
s-cd47-CD47-1	NCGC00167430-03	Tioconazole	NA	-2.1	18.6548	25.821	-4.7292	s-cd47-WT_JUR-1	NCGC00167430-03	-2.1	23.485	19.307	-4.6292	-0.1	6.514	0.105458
s-cd47-CD47-1	NCGC00015501-07	Hydralazine hydrochloride	NA	-2.4	6.619	89.861	-5.1792	s-cd47-WT_JUR-1	NCGC00015501-07	4	23.485	83.347	-4.6292	-0.55	6.514	0.105458
s-cd47-CD47-1	NCGC00346467-01	VCH-916	NA	-3	33.1734	65.342	-4.4792	s-cd47-WT_JUR-1	NCGC00346467-01	-3	33.1734	58.785	-4.4792	0	6.557	0.108082
s-cd47-CD47-1	NCGC00095486-03	Ergosterol	NA	4		115.349		s-cd47-WT_JUR-1	NCGC00095486-03	-1.4	0.0166	108.598	-7.7792	7.7792	6.751	0.11992
s-cd47-CD47-1	NCGC00015278-14	Carisoprodol	NA	4	0.0059	105.956	-8.2292	s-cd47-WT_JUR-1	NCGC00015278-14	4	2.9566	99.128	-5.5292	-2.7	6.828	0.124619
s-cd47-CD47-1	NCGC00346517-01	Daptomycin	NA	4	37.2212	125.38	-4.4292	s-cd47-WT_JUR-1	NCGC00346517-01	4	0.4686	118.483	-6.3292	1.9	6.897	0.128829
s-cd47-CD47-1	NCGC00164594-01	Loteprednol etabonate	NA	-2.4	16.6261	90.703	-4.7792	s-cd47-WT_JUR-1	NCGC00164594-01	4	37.2212	83.77	-4.4292	-0.35	6.933	0.131026
s-cd47-CD47-1	NCGC00018181-13	Nalidixic acid	NA	2.4	1.049	103.441	-5.9792	s-cd47-WT_JUR-1	NCGC00018181-13	1.4	0.0053	96.458	-8.2792	2.3	6.983	0.134077
s-cd47-CD47-1	NCGC00167438-02	Trospium chloride	NA	4	0.0017	115.746	-8.7792	s-cd47-WT_JUR-1	NCGC00167438-02	4	0.001	108.691	-8.9792	0.2	7.055	0.13847
s-cd47-CD47-1	NCGC00346433-01	Peramivir	NA	1.4	0.0021	101.203	-8.6792	s-cd47-WT_JUR-1	NCGC00346433-01	1.4	0.003	94.128	-8.5292	-0.15	7.075	0.139691
s-cd47-CD47-1	NCGC00178520-05	Bromhexine hydrochloride	NA	-3	18.6548	71.666	-4.7292	s-cd47-WT_JUR-1	NCGC00178520-05	-3	26.3506	64.407	-4.5792	-0.15	7.259	0.150918
s-cd47-CD47-1	NCGC00018257-07	Methocarbamol	NA	4	0.0187	123.197	-7.7292	s-cd47-WT_JUR-1	NCGC00018257-07	4		115.891		-7.7292	7.306	0.153786
s-cd47-CD47-1	NCGC00018302-08	Trichlormethiazide	NA	4		106.839		s-cd47-WT_JUR-1	NCGC00018302-08	4		99.494		0	7.345	0.156166
s-cd47-CD47-1	NCGC00016530-06	Sulfameter	NA	4	0.059	132.159	-7.2292	s-cd47-WT_JUR-1	NCGC00016530-06	4		124.765		-7.2292	7.394	0.159156
s-cd47-CD47-1	NCGC00164624-03	Adefovir dipivoxil	NA	-2.2	20.931	46.825	-4.6792	s-cd47-WT_JUR-1	NCGC00164624-03	-2.1	18.6548	39.425	-4.7292	0.05	7.4	0.159522
s-cd47-CD47-1	NCGC00090774-03	Nitazoxanide	NA	-2.1	19.1437	18.379	-4.718	s-cd47-WT_JUR-1	NCGC00090774-03	-1.1	17.0619	10.888	-4.768	0.05	7.491	0.165075
s-cd47-CD47-1	NCGC00346889-01	PF-03716556	NA	4	0.1049	111.84	-6.9792	s-cd47-WT_JUR-1	NCGC00346889-01	4	1.8655	104.282	-5.7292	-1.25	7.558	0.169164
s-cd47-CD47-1	NCGC00178840-06	Sodium cloxacillin	NA	4		109.502		s-cd47-WT_JUR-1	NCGC00178840-06	4		101.918		0	7.584	0.17075
s-cd47-CD47-1	NCGC00016305-10	Silver sulfadiazine	NA	1.4	0.0166	130.083	-7.7792	s-cd47-WT_JUR-1	NCGC00016305-10	4	0.935	122.425	-6.0292	-1.75	7.658	0.175266
s-cd47-CD47-1	NCGC00346532-01	Lomibuvir	NA	-3	29.5659	48.26	-4.5292	s-cd47-WT_JUR-1	NCGC00346532-01	-3	37.2212	40.44	-4.4292	-0.1	7.82	0.185151
s-cd47-CD47-1	NCGC00016831-04	Buflomedil hydrochloride	NA	4	20.931	90.107	-4.6792	s-cd47-WT_JUR-1	NCGC00016831-04	4	0.0372	82.249	-7.4292	2.75	7.858	0.18747
s-cd47-CD47-1	NCGC00183362-01	Pentagastrin	NA	-1.4	1.3207	17.915	-5.8792	s-cd47-WT_JUR-1	NCGC00183362-01	-1.1	1.177	9.917	-5.9292	0.05	7.998	0.196013
s-cd47-CD47-1	NCGC00025234-01	Alprostadil	NA	4	37.2212	84.929	-4.4292	s-cd47-WT_JUR-1	NCGC00025234-01	-3	23.485	76.793	-4.6292	0.2	8.136	0.204433
s-cd47-CD47-1	NCGC00346629-01	Dolutegravir	NA	-2.2	18.6548	54.71	-4.7292	s-cd47-WT_JUR-1	NCGC00346629-01	-3	33.1734	46.359	-4.4792	-0.25	8.351	0.217553
s-cd47-CD47-1	NCGC00182552-03	Atazanavir sulfate	NA	4	37.2212	90.456	-4.4292	s-cd47-WT_JUR-1	NCGC00182552-03	-3	20.931	82.035	-4.6792	0.25	8.421	0.221824
s-cd47-CD47-1	NCGC00346585-01	PNU-200577	NA	4	0.0166	90.017	-7.7792	s-cd47-WT_JUR-1	NCGC00346585-01	-2.4	37.2212	81.563	-4.4292	-3.35	8.454	0.223838
s-cd47-CD47-1	NCGC00344549-02	Oxandrolone	NA	4		114.632		s-cd47-WT_JUR-1	NCGC00344549-02	4	0.1049	106.07	-6.9792	6.9792	8.562	0.230428
s-cd47-CD47-1	NCGC00017354-06	Spectinomycin hydrochloride	NA	-1.1	2.9566	9.628	-5.5292	s-cd47-WT_JUR-1	NCGC00017354-06	-1.1	4.1763	1.046	-5.3792	-0.15	8.582	0.231648
s-cd47-CD47-1	NCGC00090905-11	Busulfan	NA	4	37.2212	123.108	-4.4292	s-cd47-WT_JUR-1	NCGC00090905-11	-2.4	4.1763	114.293	-5.3792	0.95	8.815	0.245866
s-cd47-CD47-1	NCGC00024246-13	Daunorubicin	NA	-1.1	0.0833	12.893	-7.0792	s-cd47-WT_JUR-1	NCGC00024246-13	-1.1	0.1663	4.015	-6.7792	-0.3	8.878	0.24971
s-cd47-CD47-1	NCGC00018139-08	Ipriflavone	NA	-2.2	10.4904	82.112	-4.9792	s-cd47-WT_JUR-1	NCGC00018139-08	-2.4	20.931	73.171	-4.6792	-0.3	8.941	0.253555
s-cd47-CD47-1	NCGC00022819-03	Ipratropium bromide	NA	4		122.369		s-cd47-WT_JUR-1	NCGC00022819-03	4		113.185		0	9.184	0.268383
s-cd47-CD47-1	NCGC00160514-03	Idebenone	NA	-2.1	16.6261	19.128	-4.7792	s-cd47-WT_JUR-1	NCGC00160514-03	-2.1	18.6548	9.881	-4.7292	-0.05	9.247	0.272227
s-cd47-CD47-1	NCGC00159513-02	Cefprozil	NA	4		104.267		s-cd47-WT_JUR-1	NCGC00159513-02	4	0.4686	95.006	-6.3292	6.3292	9.261	0.273081
s-cd47-CD47-1	NCGC00142598-05	beta-Sitosterol	NA	4	0.0019	115.407	-8.7292	s-cd47-WT_JUR-1	NCGC00142598-05	4	5.2576	105.878	-5.2792	-3.45	9.529	0.289435
s-cd47-CD47-1	NCGC00181000-03	Suplatast tosilate	NA	1.4	0.003	109.437	-8.5292	s-cd47-WT_JUR-1	NCGC00181000-03	4	0.0033	99.512	-8.4792	-0.05	9.925	0.313599
s-cd47-CD47-1	NCGC00016656-01	Vidarabine	NA	4	0.1049	95.233	-6.9791	s-cd47-WT_JUR-1	NCGC00016656-01	4	26.3544	85.239	-4.5791	-2.4	9.994	0.317809
s-cd47-CD47-1	NCGC00016978-05	Repaglinide	NA	1.4	0.0019	93.939	-8.7292	s-cd47-WT_JUR-1	NCGC00016978-05	4	37.2212	83.941	-4.4292	-4.3	9.998	0.318053
s-cd47-CD47-1	NCGC00179363-04	Ursodiol	NA	-3	33.1734	58.284	-4.4792	s-cd47-WT_JUR-1	NCGC00179363-04	-3	33.1734	48.225	-4.4792	0	10.059	0.321775
s-cd47-CD47-1	NCGC00015349-06	Daphnetin	NA	-2.2	16.6261	40.585	-4.7792	s-cd47-WT_JUR-1	NCGC00015349-06	-2.2	18.6548	30.409	-4.7292	-0.05	10.176	0.328915
s-cd47-CD47-1	NCGC00177986-04	Pefloxacin	NA	4		107.334		s-cd47-WT_JUR-1	NCGC00177986-04	4	23.485	96.968	-4.6292	4.6292	10.366	0.340509
s-cd47-CD47-1	NCGC00179511-04	Racecadotril	NA	-1.1	2.6351	24.771	-5.5792	s-cd47-WT_JUR-1	NCGC00179511-04	-2.1	4.6859	14.295	-5.3292	-0.25	10.476	0.347221
s-cd47-CD47-1	NCGC00263521-02	Deflazacort	NA	4		115.138		s-cd47-WT_JUR-1	NCGC00263521-02	4		104.512		0	10.626	0.356374
s-cd47-CD47-1	NCGC00090753-05	Azithromycin (AZ)	NA	4	0.0021	96.913	-8.6792	s-cd47-WT_JUR-1	NCGC00090753-05	-2.4	18.6548	86.203	-4.7292	-3.95	10.71	0.3615
s-cd47-CD47-1	NCGC00018199-06	Rhein	NA	-2.2	38.1968	55.593	-4.418	s-cd47-WT_JUR-1	NCGC00018199-06	-2.2	38.1968	44.782	-4.418	0	10.811	0.367663
s-cd47-CD47-1	NCGC00167453-02	Clinofibrate	NA	4		108.85		s-cd47-WT_JUR-1	NCGC00167453-02	4		97.999		0	10.851	0.370104
s-cd47-CD47-1	NCGC00015466-04	Gabapentin	NA	4		102.908		s-cd47-WT_JUR-1	NCGC00015466-04	4		91.845		0	11.063	0.38304
s-cd47-CD47-1	NCGC00090759-02	Cisplatin	NA	-3	37.2212	71.084	-4.4292	s-cd47-WT_JUR-1	NCGC00090759-02	-2.2	23.485	59.973	-4.6292	0.2	11.111	0.385969
s-cd47-CD47-1	NCGC00015226-11	Mitotane	NA	-2.1	18.6548	16.027	-4.7292	s-cd47-WT_JUR-1	NCGC00015226-11	-2.1	18.6548	4.844	-4.7292	0	11.183	0.390362
s-cd47-CD47-1	NCGC00246966-03	Flubendazole	NA	-1.1	0.3722	25.101	-6.4292	s-cd47-WT_JUR-1	NCGC00246966-03	-1.1	0.2957	13.827	-6.5292	0.1	11.274	0.395915
s-cd47-CD47-1	NCGC00142483-02	Cytidine	NA	1.4	0.0105	102.37	-7.9792	s-cd47-WT_JUR-1	NCGC00142483-02	4		91.088		-7.9792	11.282	0.396403
s-cd47-CD47-1	NCGC00095112-04	Avobenzone	NA	-1.1	5.8992	20.586	-5.2292	s-cd47-WT_JUR-1	NCGC00095112-04	-1.1	5.8992	9.161	-5.2292	0	11.425	0.405129
s-cd47-CD47-1	NCGC00016889-05	Tenoxicam	NA	4	3.3173	107.725	-5.4792	s-cd47-WT_JUR-1	NCGC00016889-05	4	11.7704	96.277	-4.9292	-0.55	11.448	0.406533
s-cd47-CD47-1	NCGC00346607-01	Curcumol	NA	4	0.1663	120.014	-6.7792	s-cd47-WT_JUR-1	NCGC00346607-01	4	33.1734	108.566	-4.4792	-2.3	11.448	0.406533
s-cd47-CD47-1	NCGC00164576-03	Lopinavir	NA	-3	29.5659	20.633	-4.5292	s-cd47-WT_JUR-1	NCGC00164576-03	-2.1	13.2066	9.128	-4.8792	0.35	11.505	0.410011
s-cd47-CD47-1	NCGC00090782-07	Viracept	NA	-2.1	23.485	12.843	-4.6292	s-cd47-WT_JUR-1	NCGC00090782-07	-2.1	23.485	1.302	-4.6292	0	11.541	0.412208
s-cd47-CD47-1	NCGC00274065-01	Desonide	NA	4		109.249		s-cd47-WT_JUR-1	NCGC00274065-01	-1.4	0.0187	97.697	-7.7292	7.7292	11.552	0.412879
s-cd47-CD47-1	NCGC00346516-01	Cefoselis sulfate	NA	4	0.935	93.508	-6.0292	s-cd47-WT_JUR-1	NCGC00346516-01	-2.4	18.6548	81.784	-4.7292	-1.3	11.724	0.423374
s-cd47-CD47-1	NCGC00015332-04	Diltiazem hydrochloride	NA	4	1.177	111.716	-5.9292	s-cd47-WT_JUR-1	NCGC00015332-04	4	0.0418	99.859	-7.3792	1.45	11.857	0.43149
s-cd47-CD47-1	NCGC00167496-02	Methylene blue	NA	-2.1	5.2576	21.698	-5.2792	s-cd47-WT_JUR-1	NCGC00167496-02	-1.1	2.6351	9.601	-5.5792	0.3	12.097	0.446135
s-cd47-CD47-1	NCGC00016960-03	Glimepiride	NA	4		109.904		s-cd47-WT_JUR-1	NCGC00016960-03	4		97.567		0	12.337	0.46078
s-cd47-CD47-1	NCGC00023037-06	Pancuronium bromide	NA	4	0.0935	104.328	-7.0292	s-cd47-WT_JUR-1	NCGC00023037-06	-3	26.3506	91.944	-4.5792	-2.45	12.384	0.463648
s-cd47-CD47-1	NCGC00093802-08	Dehydroepiandrosterone	NA	-2.2	23.485	50.751	-4.6292	s-cd47-WT_JUR-1	NCGC00093802-08	-2.2	23.485	38.12	-4.6292	0	12.631	0.47872
s-cd47-CD47-1	NCGC00247029-02	2-Deoxyglucose	NA	4	3.7221	101.4	-5.4292	s-cd47-WT_JUR-1	NCGC00247029-02	4	0.0009	88.737	-9.0292	3.6	12.663	0.480673
s-cd47-CD47-1	NCGC00345173-01	GSK525768	NA	-2.2	14.818	54.164	-4.8292	s-cd47-WT_JUR-1	NCGC00345173-01	-2.2	13.2066	41.448	-4.8792	0.05	12.716	0.483907
s-cd47-CD47-1	NCGC00091861-06	Dacarbazine	NA	-1.1	4.1763	55.176	-5.3792	s-cd47-WT_JUR-1	NCGC00091861-06	-1.1	3.7221	42.351	-5.4292	0.05	12.825	0.490558
s-cd47-CD47-1	NCGC00022398-06	Fluocinonide	NA	4	13.2066	104.125	-4.8792	s-cd47-WT_JUR-1	NCGC00022398-06	4	37.2212	91.285	-4.4292	-0.45	12.84	0.491473
s-cd47-CD47-1	NCGC00016407-11	Sulfamethizole	NA	-2.1	20.931	16.985	-4.6792	s-cd47-WT_JUR-1	NCGC00016407-11	-2.1	18.6548	3.39	-4.7292	0.05	13.595	0.537543
s-cd47-CD47-1	NCGC00016752-02	Clindamycin hydrochloride	NA	4		136.957		s-cd47-WT_JUR-1	NCGC00016752-02	4	33.1734	123.348	-4.4792	4.4792	13.609	0.538398
s-cd47-CD47-1	NCGC00347942-01	Cilliobrevin D	NA	-1.4	0.0026	135.085	-8.5792	s-cd47-WT_JUR-1	NCGC00347942-01	4	16.6261	121.379	-4.7792	-3.8	13.706	0.544317
s-cd47-CD47-1	NCGC00344550-02	Stanozolol	NA	-2.2	18.6548	63.519	-4.7292	s-cd47-WT_JUR-1	NCGC00344550-02	-2.2	23.485	49.647	-4.6292	-0.1	13.872	0.554446
s-cd47-CD47-1	NCGC00179501-05	Aurantiamarin	NA	4	5.8992	90.43	-5.2292	s-cd47-WT_JUR-1	NCGC00179501-05	-2.4	14.818	76.465	-4.8292	-0.4	13.965	0.560121
s-cd47-CD47-1	NCGC00016610-08	Tolnaftate	NA	4	20.931	88.531	-4.6792	s-cd47-WT_JUR-1	NCGC00016610-08	-3	23.485	74.405	-4.6292	-0.05	14.126	0.569945
s-cd47-CD47-1	NCGC00346602-01	Lappaconitine	NA	4		117.143		s-cd47-WT_JUR-1	NCGC00346602-01	1.2	0.0013	102.989	-8.8792	8.8792	14.154	0.571654
s-cd47-CD47-1	NCGC00346589-01	Cinchonidine	NA	-2.1	20.931	22.697	-4.6792	s-cd47-WT_JUR-1	NCGC00346589-01	-1.3	3.3173	8.53	-5.4792	0.8	14.167	0.572447
s-cd47-CD47-1	NCGC00163507-02	Octylonium bromide	NA	-2.2	18.6548	56.652	-4.7292	s-cd47-WT_JUR-1	NCGC00163507-02	-2.2	20.931	42.461	-4.6792	-0.05	14.191	0.573912
s-cd47-CD47-1	NCGC00164549-01	Dofetilide	NA	4		124.28		s-cd47-WT_JUR-1	NCGC00164549-01	4		110.063		0	14.217	0.575498
s-cd47-CD47-1	NCGC00015245-07	Bethanechol chloride	NA	4		123.726		s-cd47-WT_JUR-1	NCGC00015245-07	4	1.4818	109.471	-5.8292	5.8292	14.255	0.577817
s-cd47-CD47-1	NCGC00167506-03	Pimecrolimus	NA	-1.2	10.4904	44.373	-4.9792	s-cd47-WT_JUR-1	NCGC00167506-03	-2.2	11.7704	29.886	-4.9292	-0.05	14.487	0.591974
s-cd47-CD47-1	NCGC00015208-09	Caffeine	NA	4	0.4686	118.643	-6.3292	s-cd47-WT_JUR-1	NCGC00015208-09	4	1.3207	103.982	-5.8792	-0.45	14.661	0.602591
s-cd47-CD47-1	NCGC00184994-03	Cidofovir	NA	4	0.0645	156.16	-7.1904	s-cd47-WT_JUR-1	NCGC00184994-03	4	0.0162	141.272	-7.7904	0.6	14.888	0.616443
s-cd47-CD47-1	NCGC00023722-07	Floxuridine	NA	-1.2	0.3722	26.472	-6.4292	s-cd47-WT_JUR-1	NCGC00023722-07	-1.1	0.1482	11.526	-6.8292	0.4	14.946	0.619982
s-cd47-CD47-1	NCGC00016480-09	Kaempferol	NA	-3	26.3506	34.814	-4.5792	s-cd47-WT_JUR-1	NCGC00016480-09	-3	33.1734	19.819	-4.4792	-0.1	14.995	0.622972
s-cd47-CD47-1	NCGC00015605-10	Lamotrigine	NA	4	33.1734	85.526	-4.4792	s-cd47-WT_JUR-1	NCGC00015605-10	-3	26.3506	70.505	-4.5792	0.1	15.021	0.624559
s-cd47-CD47-1	NCGC00018238-08	Oxibendazole	NA	-1.2	0.5899	33.817	-6.2292	s-cd47-WT_JUR-1	NCGC00018238-08	-1.4	0.0053	18.741	-8.2792	2.05	15.076	0.627915
s-cd47-CD47-1	NCGC00164336-05	L-Thyroxine	NA	4		115.645		s-cd47-WT_JUR-1	NCGC00164336-05	4	18.6548	100.354	-4.7292	4.7292	15.291	0.641034
s-cd47-CD47-1	NCGC00185774-01	Erdosteine	NA	4	0.1321	130.326	-6.8792	s-cd47-WT_JUR-1	NCGC00185774-01	4		114.98		-6.8792	15.346	0.64439
s-cd47-CD47-1	NCGC00264052-01	Hyodeoxycholic acid (HDCA)	NA	4		114.84		s-cd47-WT_JUR-1	NCGC00264052-01	4	0.0019	99.389	-8.7292	8.7292	15.451	0.650797
s-cd47-CD47-1	NCGC00185990-05	Ketorolac	NA	-2.2	14.818	43.223	-4.8292	s-cd47-WT_JUR-1	NCGC00185990-05	-2.1	26.3506	27.769	-4.5792	-0.25	15.454	0.65098
s-cd47-CD47-1	NCGC00345083-01	Stauprimide	NA	4	7.4266	68.957	-5.1292	s-cd47-WT_JUR-1	NCGC00345083-01	-1.2	4.6859	53.368	-5.3292	0.2	15.589	0.659218
s-cd47-CD47-1	NCGC00253760-02	Albendazole Oxide	NA	-2.2	11.7704	35.439	-4.9292	s-cd47-WT_JUR-1	NCGC00253760-02	-1.1	10.4904	19.832	-4.9792	0.05	15.607	0.660316
s-cd47-CD47-1	NCGC00090797-11	Digoxin	NA	-1.1	0.1521	23.541	-6.818	s-cd47-WT_JUR-1	NCGC00090797-11	-1.1	0.1355	7.852	-6.868	0.05	15.689	0.66532
s-cd47-CD47-1	NCGC00096081-03	beta-Carotene	NA	-2.1	23.485	17.562	-4.6292	s-cd47-WT_JUR-1	NCGC00096081-03	-2.1	23.485	1.765	-4.6292	0	15.797	0.67191
s-cd47-CD47-1	NCGC00015075-07	Arecoline	NA	4		130.793		s-cd47-WT_JUR-1	NCGC00015075-07	4		114.377		0	16.416	0.709682
s-cd47-CD47-1	NCGC00186010-02	Genipin	NA	-2.2	18.6548	52.056	-4.7292	s-cd47-WT_JUR-1	NCGC00186010-02	-3	26.3506	35.472	-4.5792	-0.15	16.584	0.719933
s-cd47-CD47-1	NCGC00015519-09	Dopamine HCl	NA	-2.2	20.931	70.587	-4.6792	s-cd47-WT_JUR-1	NCGC00015519-09	-2.2	18.6548	53.992	-4.7292	0.05	16.595	0.720605
s-cd47-CD47-1	NCGC00346969-01	JS-59-4	NA	-1.1	0.8333	21.249	-6.0792	s-cd47-WT_JUR-1	NCGC00346969-01	-1.1	0.4686	4.608	-6.3292	0.25	16.641	0.723412
s-cd47-CD47-1	NCGC00090757-05	Melphalan	NA	-2.1	23.485	20.406	-4.6292	s-cd47-WT_JUR-1	NCGC00090757-05	-1.1	1.4818	3.759	-5.8292	1.2	16.647	0.723778
s-cd47-CD47-1	NCGC00167967-01	Telithromycin	NA	-2.2	14.818	63.95	-4.8292	s-cd47-WT_JUR-1	NCGC00167967-01	-2.2	33.1734	47.27	-4.4792	-0.35	16.68	0.725791
s-cd47-CD47-1	NCGC00347943-01	GSK-J1	NA	4	37.2212	96.419	-4.4292	s-cd47-WT_JUR-1	NCGC00347943-01	-2.2	20.931	79.45	-4.6792	0.25	16.969	0.743426
s-cd47-CD47-1	NCGC00347948-01	IWP-2	NA	-2.2	13.2066	31.862	-4.8792	s-cd47-WT_JUR-1	NCGC00347948-01	-2.1	10.4904	14.671	-4.9792	0.1	17.191	0.756973
s-cd47-CD47-1	NCGC00346631-01	Orteronel	NA	4		123.412		s-cd47-WT_JUR-1	NCGC00346631-01	4		105.846		0	17.566	0.779855
s-cd47-CD47-1	NCGC00167524-03	Amorolfine hydrochloride	NA	-2.2	20.931	39.006	-4.6792	s-cd47-WT_JUR-1	NCGC00167524-03	-3	33.1734	21.325	-4.4792	-0.2	17.681	0.786873
s-cd47-CD47-1	NCGC00346560-01	Telbivudine	NA	4		85.187		s-cd47-WT_JUR-1	NCGC00346560-01	-3	23.485	67.374	-4.6292	4.6292	17.813	0.794927
s-cd47-CD47-1	NCGC00178698-04	Oseltamivir phosphate	NA	4		110.442		s-cd47-WT_JUR-1	NCGC00178698-04	4	0.001	92.456	-8.9792	8.9792	17.986	0.805484
s-cd47-CD47-1	NCGC00345781-01	NSC-678515	NA	-3	33.1734	40.095	-4.4792	s-cd47-WT_JUR-1	NCGC00345781-01	-3	37.2212	22.089	-4.4292	-0.05	18.006	0.806704
s-cd47-CD47-1	NCGC00346545-01	Telaprevir	NA	1.3	0.0118	57.585	-7.9292	s-cd47-WT_JUR-1	NCGC00346545-01	-2.2	20.931	39.567	-4.6792	-3.25	18.018	0.807437
s-cd47-CD47-1	NCGC00015771-12	Orphenadrine hydrochloride	NA	4	37.2212	115.497	-4.4292	s-cd47-WT_JUR-1	NCGC00015771-12	4		97.454		-4.4292	18.043	0.808962
s-cd47-CD47-1	NCGC00095537-06	Ribitol	NA	4	13.2066	116.415	-4.8792	s-cd47-WT_JUR-1	NCGC00095537-06	4	0.3722	98.325	-6.4292	1.55	18.09	0.81183
s-cd47-CD47-1	NCGC00021925-04	Prednisolone acetate	NA	4	23.485	87.12	-4.6292	s-cd47-WT_JUR-1	NCGC00021925-04	-2.2	20.931	68.905	-4.6792	0.05	18.215	0.819458
s-cd47-CD47-1	NCGC00024359-06	Penicillamine	NA	4	0.0059	127.36	-8.2292	s-cd47-WT_JUR-1	NCGC00024359-06	4	0.0418	108.988	-7.3792	-0.85	18.372	0.829038
s-cd47-CD47-1	NCGC00347063-01	KUC110948N-02	NA	-2.2	18.6548	31.814	-4.7292	s-cd47-WT_JUR-1	NCGC00347063-01	-2.3	18.6548	13.218	-4.7292	0	18.596	0.842706
s-cd47-CD47-1	NCGC00181754-01	Deferasirox	NA	-2.2	18.6548	38.279	-4.7292	s-cd47-WT_JUR-1	NCGC00181754-01	-1.1	11.7704	19.656	-4.9292	0.2	18.623	0.844354
s-cd47-CD47-1	NCGC00164553-03	Clofarabine	NA	-1.2	0.2093	27.906	-6.6792	s-cd47-WT_JUR-1	NCGC00164553-03	4		9.201		-6.6792	18.705	0.849358
s-cd47-CD47-1	NCGC00179642-04	Isoconazole nitrate	NA	-2.2	14.818	29.459	-4.8292	s-cd47-WT_JUR-1	NCGC00179642-04	-2.1	20.931	10.727	-4.6792	-0.15	18.732	0.851005
s-cd47-CD47-1	NCGC00016643-10	Trioxsalen	NA	-2.1	23.485	27.447	-4.6292	s-cd47-WT_JUR-1	NCGC00016643-10	-3	26.3506	8.408	-4.5792	-0.05	19.039	0.869738
s-cd47-CD47-1	NCGC00179435-07	Ifomide	NA	-3	37.2212	50.902	-4.4292	s-cd47-WT_JUR-1	NCGC00179435-07	-2.1	23.485	31.841	-4.6292	0.2	19.061	0.871081
s-cd47-CD47-1	NCGC00016447-02	Proscillaridin	NA	-1.2	0.0083	25.468	-8.0792	s-cd47-WT_JUR-1	NCGC00016447-02	-1.1	0.0094	5.527	-8.0292	-0.05	19.941	0.924779
s-cd47-CD47-1	NCGC00024547-06	nor-Binaltorphimine	NA	4		132.36		s-cd47-WT_JUR-1	NCGC00024547-06	4		112.363		0	19.997	0.928196
s-cd47-CD47-1	NCGC00167433-02	Rocuronium bromide	NA	4	8.3328	92.76	-5.0792	s-cd47-WT_JUR-1	NCGC00167433-02	-3	29.5659	72.693	-4.5292	-0.55	20.067	0.932467
s-cd47-CD47-1	NCGC00015116-10	Aniracetam	NA	4		102.22		s-cd47-WT_JUR-1	NCGC00015116-10	4	11.7704	82.094	-4.9292	4.9292	20.126	0.936067
s-cd47-CD47-1	NCGC00346832-01	Terameprocol	NA	-1.1	0.4686	30.413	-6.3292	s-cd47-WT_JUR-1	NCGC00346832-01	-1.1	0.3722	10.098	-6.4292	0.1	20.315	0.9476
s-cd47-CD47-1	NCGC00347935-01	AGI-6780	NA	-2.2	20.931	58.563	-4.6792	s-cd47-WT_JUR-1	NCGC00347935-01	-3	33.1734	38.247	-4.4792	-0.2	20.316	0.947661
s-cd47-CD47-1	NCGC00094927-01	Flunisolide	NA	4	0.0332	130.386	-7.4792	s-cd47-WT_JUR-1	NCGC00094927-01	4		109.852		-7.4792	20.534	0.960964
s-cd47-CD47-1	NCGC00179673-04	Idoxuridine	NA	4	1.6626	101.516	-5.7792	s-cd47-WT_JUR-1	NCGC00179673-04	-2.2	16.6261	79.933	-4.7792	-1	21.583	1.02497
s-cd47-CD47-1	NCGC00017338-05	Antimycin A	NA	-1.2	0.0166	46.04	-7.7792	s-cd47-WT_JUR-1	NCGC00017338-05	-1.1	0.0235	24.41	-7.6292	-0.15	21.63	1.02784
s-cd47-CD47-1	NCGC00091109-03	Neohesperidin dihydrochalcone	NA	-2.1	18.6548	31.011	-4.7292	s-cd47-WT_JUR-1	NCGC00091109-03	-3	29.5659	9.336	-4.5292	-0.2	21.675	1.03059
s-cd47-CD47-1	NCGC00093704-11	Cyclosporine A	NA	-2.4	18.6548	34.992	-4.7292	s-cd47-WT_JUR-1	NCGC00093704-11	-2.1	18.6548	13.202	-4.7292	0	21.79	1.03761
s-cd47-CD47-1	NCGC00347934-01	AGI-5198	NA	-3	37.2212	45.976	-4.4292	s-cd47-WT_JUR-1	NCGC00347934-01	-3	29.5659	24.153	-4.5292	0.1	21.823	1.03962
s-cd47-CD47-1	NCGC00159346-05	Terbinafine hydrochloride	NA	-3	23.485	58.754	-4.6292	s-cd47-WT_JUR-1	NCGC00159346-05	-3	37.2212	36.243	-4.4292	-0.2	22.511	1.0816
s-cd47-CD47-1	NCGC00159518-04	Rabeprazole	NA	4	2.0931	115.444	-5.6792	s-cd47-WT_JUR-1	NCGC00159518-04	4	18.6548	92.342	-4.7292	-0.95	23.102	1.11766
s-cd47-CD47-1	NCGC00091104-05	Aspartame	NA	4		127.356		s-cd47-WT_JUR-1	NCGC00091104-05	4	0.1049	103.971	-6.9792	6.9792	23.385	1.13493
s-cd47-CD47-1	NCGC00186037-01	Ibandronate sodium hydrate	NA	3	33.1734	127.096	-4.4792	s-cd47-WT_JUR-1	NCGC00186037-01	1.2	0.0017	103.48	-8.7792	4.3	23.616	1.14903
s-cd47-CD47-1	NCGC00162440-01	Elactocin	NA	-1.2	0.0156	30.361	-7.807	s-cd47-WT_JUR-1	NCGC00162440-01	-1.1	0.0349	6.663	-7.457	-0.35	23.698	1.15403
s-cd47-CD47-1	NCGC00163468-06	Mitomycin	NA	-3	29.5659	25.245	-4.5292	s-cd47-WT_JUR-1	NCGC00163468-06	-2.1	14.818	1.358	-4.8292	0.3	23.887	1.16557
s-cd47-CD47-1	NCGC00346586-01	Baicalin	NA	-2.2	13.2066	78.198	-4.8792	s-cd47-WT_JUR-1	NCGC00346586-01	-3	33.1734	52.935	-4.4792	-0.4	25.263	1.24953
s-cd47-CD47-1	NCGC00346584-01	Asiatic acid	NA	-2.4	37.2212	87.171	-4.4292	s-cd47-WT_JUR-1	NCGC00346584-01	4		61.399		-4.4292	25.772	1.28059
s-cd47-CD47-1	NCGC00346498-01	Danoprevir	NA	1.1	0.0118	101.689	-7.9292	s-cd47-WT_JUR-1	NCGC00346498-01	-3	37.2212	75.521	-4.4292	-3.5	26.168	1.30475
s-cd47-CD47-1	NCGC00015508-17	Hydrochlorothiazide	NA	-3	37.2212	42.166	-4.4292	s-cd47-WT_JUR-1	NCGC00015508-17	-3	33.1734	15.923	-4.4792	0.05	26.243	1.30933
s-cd47-CD47-1	NCGC00092361-06	Prostaglandin E2	NA	-3	26.3506	68.744	-4.5792	s-cd47-WT_JUR-1	NCGC00092361-06	-2.2	20.931	41.698	-4.6792	0.1	27.046	1.35833
s-cd47-CD47-1	NCGC00164617-05	Adapalene	NA	-1.2	5.2576	48.053	-5.2792	s-cd47-WT_JUR-1	NCGC00164617-05	-1.1	4.1763	20.674	-5.3792	0.1	27.379	1.37865
s-cd47-CD47-1	NCGC00178638-04	Valaciclovir	NA	-3	37.2212	73.063	-4.4292	s-cd47-WT_JUR-1	NCGC00178638-04	-3	29.5659	45.639	-4.5292	0.1	27.424	1.38139
s-cd47-CD47-1	NCGC00166413-03	Argatroban	NA	4		92.128		s-cd47-WT_JUR-1	NCGC00166413-03	-3	26.3506	64.584	-4.5792	4.5792	27.544	1.38872
s-cd47-CD47-1	NCGC00016645-03	Methacycline hydrochloride	NA	-2.2	16.6261	46.269	-4.7792	s-cd47-WT_JUR-1	NCGC00016645-03	-3	29.5659	18.154	-4.5292	-0.25	28.115	1.42356
s-cd47-CD47-1	NCGC00179649-07	Prednisolone	NA	-2.2	23.485	71.927	-4.6292	s-cd47-WT_JUR-1	NCGC00179649-07	-2.2	20.931	43.795	-4.6792	0.05	28.132	1.4246
s-cd47-CD47-1	NCGC00023193-04	Triamcinolone acetonide	NA	4	0.0332	99.996	-7.4792	s-cd47-WT_JUR-1	NCGC00023193-04	-2.4	26.3506	71.308	-4.5792	-2.9	28.688	1.45852
s-cd47-CD47-1	NCGC00024379-04	Emetine	NA	-1.2	0.1049	33.945	-6.9792	s-cd47-WT_JUR-1	NCGC00024379-04	-1.1	0.1049	5.168	-6.9792	0	28.777	1.46395
s-cd47-CD47-1	NCGC00185756-01	Estramustine	NA	1.4	0.0017	135.618	-8.7792	s-cd47-WT_JUR-1	NCGC00185756-01	-3	37.2212	105.466	-4.4292	-4.35	30.152	1.54786
s-cd47-CD47-1	NCGC00091268-11	Oxytetracycline	NA	-2.2	18.6548	71.104	-4.7292	s-cd47-WT_JUR-1	NCGC00091268-11	-3	33.1734	40.887	-4.4792	-0.25	30.217	1.55182
s-cd47-CD47-1	NCGC00178483-04	Limonin	NA	4	0.1663	137.297	-6.7792	s-cd47-WT_JUR-1	NCGC00178483-04	4		106.306		-6.7792	30.991	1.59905
s-cd47-CD47-1	NCGC00163135-04	Niguldipine	NA	4	0.0083	133.155	-8.0792	s-cd47-WT_JUR-1	NCGC00163135-04	4		102.048		-8.0792	31.107	1.60613
s-cd47-CD47-1	NCGC00015185-04	Carbidopa	NA	-2.2	20.931	43.994	-4.6792	s-cd47-WT_JUR-1	NCGC00015185-04	-2.1	23.485	12.731	-4.6292	-0.05	31.263	1.61565
s-cd47-CD47-1	NCGC00021301-04	Fluocinolone acetonide	NA	-2.4	20.931	57.23	-4.6792	s-cd47-WT_JUR-1	NCGC00021301-04	-2.1	20.931	25.744	-4.6792	0	31.486	1.62926
s-cd47-CD47-1	NCGC00346565-01	Elvitegravir	NA	-3	26.3506	44.755	-4.5792	s-cd47-WT_JUR-1	NCGC00346565-01	-3	26.3506	12.72	-4.5792	0	32.035	1.66276
s-cd47-CD47-1	NCGC00016797-04	Amoxicillin sodium	NA	-2.4	93.4955	61.467	-4.0292	s-cd47-WT_JUR-1	NCGC00016797-04	-3	37.2212	27.97	-4.4292	0.4	33.497	1.75197
s-cd47-CD47-1	NCGC00263858-03	Carboplatin	NA	4		152.695		s-cd47-WT_JUR-1	NCGC00263858-03	-1.4	0.0012	118.461	-8.9292	8.9292	34.234	1.79694
s-cd47-CD47-1	NCGC00091835-09	Chlormethine	NA	-2.2	20.931	77.133	-4.6792	s-cd47-WT_JUR-1	NCGC00091835-09	-3	37.2212	42.804	-4.4292	-0.25	34.329	1.80274
s-cd47-CD47-1	NCGC00016270-10	Levodopa	NA	-3	37.2212	77.71	-4.4292	s-cd47-WT_JUR-1	NCGC00016270-10	-3	26.3506	43.316	-4.5792	0.15	34.394	1.80671
s-cd47-CD47-1	NCGC00182047-02	Fludarabine phosphate	NA	-2.2	11.7704	46.884	-4.9292	s-cd47-WT_JUR-1	NCGC00182047-02	-1.1	7.4266	12.348	-5.1292	0.2	34.536	1.81537
s-cd47-CD47-1	NCGC00271534-03	Nateglinide	NA	4		111.519		s-cd47-WT_JUR-1	NCGC00271534-03	-2.2	16.6261	76.528	-4.7792	4.7792	34.991	1.84314
s-cd47-CD47-1	NCGC00346888-01	UK-383367	NA	-1.2	5.8992	49.091	-5.2292	s-cd47-WT_JUR-1	NCGC00346888-01	-2.1	10.4904	13.282	-4.9792	-0.25	35.809	1.89305
s-cd47-CD47-1	NCGC00347952-01	NSC319726	NA	-1.2	0.0033	47.192	-8.4792	s-cd47-WT_JUR-1	NCGC00347952-01	-1.2	0.003	9.878	-8.5292	0.05	37.314	1.98489
s-cd47-CD47-1	NCGC00346660-01	10-Deacetylbaccatin	NA	-1.2	1.8655	76.768	-5.7292	s-cd47-WT_JUR-1	NCGC00346660-01	-1.1	2.3485	39.362	-5.6292	-0.1	37.406	1.9905
s-cd47-CD47-1	NCGC00347940-01	Bioymifi	NA	-1.1	2.0931	48.515	-5.6792	s-cd47-WT_JUR-1	NCGC00347940-01	-1.1	2.6351	10.488	-5.5792	-0.1	38.027	2.02839
s-cd47-CD47-1	NCGC00346930-01	Picoplatin	NA	-2.1	37.2212	53.529	-4.4292	s-cd47-WT_JUR-1	NCGC00346930-01	-2.1	18.6548	11.955	-4.7292	0.3	41.574	2.24483
s-cd47-CD47-1	NCGC00161290-05	16,16-dimethyl PGE2	NA	-2.2	18.6548	73.807	-4.7292	s-cd47-WT_JUR-1	NCGC00161290-05	-2.1	29.5659	31.844	-4.5292	-0.2	41.963	2.26857
s-cd47-CD47-1	NCGC00093356-08	Cytarabine	NA	4	0.2635	50.088	-6.5792	s-cd47-WT_JUR-1	NCGC00093356-08	-1.2	0.0074	6.781	-8.1292	1.55	43.307	2.35058
s-cd47-CD47-1	NCGC00183044-01	Minocycline	NA	-2.2	13.2066	52.108	-4.8792	s-cd47-WT_JUR-1	NCGC00183044-01	-2.1	23.485	7.169	-4.6292	-0.25	44.939	2.45017
s-cd47-CD47-1	NCGC00016611-09	Bufexamac	NA	-3	23.485	80.782	-4.6292	s-cd47-WT_JUR-1	NCGC00016611-09	-3	26.3506	34.171	-4.5792	-0.05	46.611	2.55219
s-cd47-CD47-1	NCGC00163548-02	Echinomycin	NA	-1.2	0.003	55.044	-8.5292	s-cd47-WT_JUR-1	NCGC00163548-02	-1.1	0.0066	8.075	-8.1792	-0.35	46.969	2.57404
s-cd47-CD47-1	NCGC00164588-03	Malotilate	NA	-2.4	18.6548	81.666	-4.7292	s-cd47-WT_JUR-1	NCGC00164588-03	-3	29.5659	32.716	-4.5292	-0.2	48.95	2.69492
s-cd47-CD47-1	NCGC00346726-01	Cyclocytidine HCl	NA	-1.2	1.177	59.998	-5.9292	s-cd47-WT_JUR-1	NCGC00346726-01	-1.1	0.2348	9.572	-6.6292	0.7	50.426	2.78498
s-cd47-CD47-1	NCGC00346720-01	Entecavir	NA	-2.1	4.6859	63.062	-5.3292	s-cd47-WT_JUR-1	NCGC00346720-01	-1.1	0.3317	7.89	-6.4792	1.15	55.172	3.07459
s-cd47-CD47-1	NCGC00346501-01	Bleomycin sulfate	NA	4	18.6548	76.042	-4.7292	s-cd47-WT_JUR-1	NCGC00346501-01	-2.1	6.619	18.436	-5.1792	0.45	57.606	3.22311
s-cd47-CD47-1	NCGC00095042-08	ThioTEPA	NA	4	11.7704	81.874	-4.9292	s-cd47-WT_JUR-1	NCGC00095042-08	-2.1	18.6548	23.813	-4.7292	-0.2	58.061	3.25087
s-cd47-CD47-1	NCGC00167798-02	Oxaliplatin	NA	-2.2	20.931	109.492	-4.6792	s-cd47-WT_JUR-1	NCGC00167798-02	-2.1	33.1734	49.399	-4.4792	-0.2	60.093	3.37487
s-cd47-CD47-1	NCGC00015471-06	Ganciclovir	NA	-2.2	16.6261	69.097	-4.7792	s-cd47-WT_JUR-1	NCGC00015471-06	-2.1	18.6548	6.562	-4.7292	-0.05	62.535	3.52388
s-cd47-CD47-1	NCGC00015199-19	Chlorambucil	NA	-3	29.5659	92.524	-4.5292	s-cd47-WT_JUR-1	NCGC00015199-19	-2.1	9.3495	16.98	-5.0292	0.5	75.544	4.31769
s-cd47-CD47-1	NCGC00346597-01	Puerarin	NA	4	11.7704	110.056	-4.9292	s-cd47-WT_JUR-1	NCGC00346597-01	-3	37.2212	12.378	-4.4292	-0.5	97.678	5.66832
s-cd47-CD47-1	NCGC00345794-01	MLN-4924	NAE1	-1.2	1.049	27.482	-5.9792	s-cd47-WT_JUR-1	NCGC00345794-01	-1.1	0.5258	14.288	-6.2792	0.3	13.194	0.513074
s-cd47-CD47-1	NCGC00182868-02	Daporinad	NAMPT	-1.4	0.0059	3.063	-8.2292	s-cd47-WT_JUR-1	NCGC00182868-02	4	0.0264	10.646	-7.5792	-0.65	-7.583	-0.754746
s-cd47-CD47-1	NCGC00017358-14	Rotenone	NDUFAF1	-1.2	1.049	37.094	-5.9792	s-cd47-WT_JUR-1	NCGC00017358-14	-1.1	1.8655	17.65	-5.7292	-0.25	19.444	0.894452
s-cd47-CD47-1	NCGC00346595-01	Oridonin	NFE2L3	-1.1	7.4266	0.347	-5.1292	s-cd47-WT_JUR-1	NCGC00346595-01	-1.1	2.3485	1.221	-5.6292	0.5	-0.874	-0.34536
s-cd47-CD47-1	NCGC00346559-01	Erythromycin	NFKB1	4	23.485	76.412	-4.6292	s-cd47-WT_JUR-1	NCGC00346559-01	1.4	0.0033	103.064	-8.4792	3.85	-26.652	-1.91834
s-cd47-CD47-1	NCGC00263019-01	WAY-204688	NFKB1	-1.1	2.3485	5.475	-5.6292	s-cd47-WT_JUR-1	NCGC00263019-01	-2.2	16.6261	30.475	-4.7792	-0.85	-25	-1.81754
s-cd47-CD47-1	NCGC00025297-01	Gabexate mesilate	NFKB1	4	2.0931	102.054	-5.6792	s-cd47-WT_JUR-1	NCGC00025297-01	4		109.086		-5.6792	-7.032	-0.721124
s-cd47-CD47-1	NCGC00015086-03	Acetylcysteine	NFKB1	-3	33.1734	51.512	-4.4792	s-cd47-WT_JUR-1	NCGC00015086-03	1.2	0.0037	58.214	-8.4292	3.95	-6.702	-0.700987
s-cd47-CD47-1	NCGC00346747-02	NCGC00346747-02	NFKB1	-2.1	18.6548	21.943	-4.7292	s-cd47-WT_JUR-1	NCGC00346747-02	-2.1	20.931	27.871	-4.6792	-0.05	-5.928	-0.653757
s-cd47-CD47-1	NCGC00161703-02	NCGC00161703	NFKB1	-1.1	0.0209	0.393	-7.6792	s-cd47-WT_JUR-1	NCGC00161703-02	-1.1	0.4176	1.742	-6.3792	-1.3	-1.349	-0.374345
s-cd47-CD47-1	NCGC00186460-01	Bardoxolone methyl	NFKB1	-1.1	0.4686	0.566	-6.3292	s-cd47-WT_JUR-1	NCGC00186460-01	-1.1	0.3722	1.741	-6.4292	0.1	-1.175	-0.363727
s-cd47-CD47-1	NCGC00163415-03	Parthenolide	NFKB1	-1.1	5.8992	0.465	-5.2292	s-cd47-WT_JUR-1	NCGC00163415-03	-1.1	2.6351	1.035	-5.5792	0.35	-0.57	-0.32681
s-cd47-CD47-1	NCGC00263238-01	Withaferin A	NFKB1	-1.1	0.2635	-0.089	-6.5792	s-cd47-WT_JUR-1	NCGC00263238-01	-1.1	0.1049	0.435	-6.9792	0.4	-0.524	-0.324003
s-cd47-CD47-1	NCGC00017159-08	Curcumin	NFKB1	-1.1	10.7653	5.175	-4.968	s-cd47-WT_JUR-1	NCGC00017159-08	-1.1	7.6213	2.974	-5.118	0.15	2.201	-0.157723
s-cd47-CD47-1	NCGC00017337-15	Capsaicin	NFKB1	-1.4	2.3485	78.574	-5.6292	s-cd47-WT_JUR-1	NCGC00017337-15	-1.2	1.177	75.538	-5.9292	0.3	3.036	-0.106771
s-cd47-CD47-1	NCGC00163567-03	Honokiol	NFKB1	-3	26.3506	36.916	-4.5792	s-cd47-WT_JUR-1	NCGC00163567-03	-3	29.5659	29.171	-4.5292	-0.05	7.745	0.180574
s-cd47-CD47-1	NCGC00169864-03	Sesamin	NFKB1	4	23.485	83.417	-4.6292	s-cd47-WT_JUR-1	NCGC00169864-03	-3	29.5659	71.456	-4.5292	-0.1	11.961	0.437836
s-cd47-CD47-1	NCGC00090903-09	Sulfasalazine	NFKB1	4		115.094		s-cd47-WT_JUR-1	NCGC00090903-09	4	37.2212	103.098	-4.4292	4.4292	11.996	0.439972
s-cd47-CD47-1	NCGC00346639-01	Dimethyl fumarate	NFKB1	-2.2	23.485	54.35	-4.6292	s-cd47-WT_JUR-1	NCGC00346639-01	-3	29.5659	39.532	-4.5292	-0.1	14.818	0.612171
s-cd47-CD47-1	NCGC00263020-01	NCGC00263020-01	NFKB1	-1.1	7.4266	21.081	-5.1292	s-cd47-WT_JUR-1	NCGC00263020-01	-2.3	10.4904	1.935	-4.9792	-0.15	19.146	0.876268
s-cd47-CD47-1	NCGC00263122-01	MK-0354	NIACR1	4		102.181		s-cd47-WT_JUR-1	NCGC00263122-01	4	0.0042	102.057	-8.3792	8.3792	0.124	-0.284462
s-cd47-CD47-1	NCGC00015884-09	Rilmenidine	NISCH	1.4	0.0019	87.857	-8.7292	s-cd47-WT_JUR-1	NCGC00015884-09	-3	33.1734	56.878	-4.4792	-4.25	30.979	1.59832
s-cd47-CD47-1	NCGC00015649-05	Moxonidine hydrochloride hydrate	NISCH	4	37.2212	66.695	-4.4292	s-cd47-WT_JUR-1	NCGC00015649-05	-3	37.2212	34.088	-4.4292	0	32.607	1.69766
s-cd47-CD47-1	NCGC00017394-08	G-Strophanthin	NKAIN1	-1.2	0.0264	18.288	-7.5792	s-cd47-WT_JUR-1	NCGC00017394-08	-1.1	0.0235	9.143	-7.6292	0.05	9.145	0.266003
s-cd47-CD47-1	NCGC00346835-01	2-Iminobiotin	NOS2	4		119.357		s-cd47-WT_JUR-1	NCGC00346835-01	1.4	0.0072	113.074	-8.1404	8.1404	6.283	0.0913626
s-cd47-CD47-1	NCGC00024717-01	L-NAME	NOS3	4		123.587		s-cd47-WT_JUR-1	NCGC00024717-01	4	0.0094	107.837	-8.0292	8.0292	15.75	0.669042
s-cd47-CD47-1	NCGC00346556-01	Semagacestat	NOTCH1	4	7.4266	94.914	-5.1292	s-cd47-WT_JUR-1	NCGC00346556-01	4	13.2066	113.464	-4.8792	-0.25	-18.55	-1.42396
s-cd47-CD47-1	NCGC00346504-01	Avagacestat	NOTCH1	-2.2	5.8992	60.719	-5.2292	s-cd47-WT_JUR-1	NCGC00346504-01	-2.4	18.6548	68.698	-4.7292	-0.5	-7.979	-0.77891
s-cd47-CD47-1	NCGC00346875-01	BMS-299897	NOTCH1	-2.2	14.818	54.238	-4.8292	s-cd47-WT_JUR-1	NCGC00346875-01	-2.2	16.6261	61.989	-4.7792	-0.05	-7.751	-0.764997
s-cd47-CD47-1	NCGC00167803-03	GSI-9	NOTCH1	4	7.4266	79.832	-5.1292	s-cd47-WT_JUR-1	NCGC00167803-03	4	16.6261	85.95	-4.7792	-0.35	-6.118	-0.665351
s-cd47-CD47-1	NCGC00263188-01	YO-01027	NOTCH1	-2.2	23.485	46.605	-4.6292	s-cd47-WT_JUR-1	NCGC00263188-01	-3	23.485	49.296	-4.6292	0	-2.691	-0.456234
s-cd47-CD47-1	NCGC00263162-02	RO-4929097	NOTCH1	-2.4	18.6548	54.553	-4.7292	s-cd47-WT_JUR-1	NCGC00263162-02	-1.4	1.8655	56.918	-5.7292	1	-2.365	-0.436341
s-cd47-CD47-1	NCGC00346841-01	LY-411575	NOTCH1	4	0.935	95.307	-6.0292	s-cd47-WT_JUR-1	NCGC00346841-01	4	16.6261	83.631	-4.7792	-1.25	11.676	0.420445
s-cd47-CD47-1	NCGC00263184-01	MK-0752	NOTCH1	-2.2	16.6261	59.847	-4.7792	s-cd47-WT_JUR-1	NCGC00263184-01	-3	26.3506	40.751	-4.5792	-0.2	19.096	0.873216
s-cd47-CD47-1	NCGC00095134-03	Ezetimibe	NPC1L1	4	37.2212	101.818	-4.4292	s-cd47-WT_JUR-1	NCGC00095134-03	4	37.2212	95.137	-4.4292	0	6.681	0.115649
s-cd47-CD47-1	NCGC00263105-01	Turofexorate isopropyl	NR14H	-1.4	1.049	73.614	-5.9792	s-cd47-WT_JUR-1	NCGC00263105-01	4	0.0083	80.085	-8.0792	2.1	-6.471	-0.686891
s-cd47-CD47-1	NCGC00142400-06	Chenodeoxycholic acid	NR14H	4		101.799		s-cd47-WT_JUR-1	NCGC00142400-06	4	14.818	100.873	-4.8292	4.8292	0.926	-0.235523
s-cd47-CD47-1	NCGC00167739-03	GW-4064X	NR14H	-3	26.3506	55.139	-4.5792	s-cd47-WT_JUR-1	NCGC00167739-03	-2.2	18.6548	40.81	-4.7292	0.15	14.329	0.582332
s-cd47-CD47-1	NCGC00242476-02	GSK-4112	NR1D1	-3	20.931	59.671	-4.6792	s-cd47-WT_JUR-1	NCGC00242476-02	-2.2	14.818	59.762	-4.8292	0.15	-0.091	-0.297581
s-cd47-CD47-1	NCGC00347956-01	SR9011	NR1D1	-2.2	23.485	30.529	-4.6292	s-cd47-WT_JUR-1	NCGC00347956-01	-2.1	23.485	7.859	-4.6292	0	22.67	1.0913
s-cd47-CD47-1	NCGC00346605-01	Sodium Danshensu	NR1I2	-2.1	26.3506	1.472	-4.5792	s-cd47-WT_JUR-1	NCGC00346605-01	-2.1	26.3506	3.967	-4.5792	0	-2.495	-0.444274
s-cd47-CD47-1	NCGC00271415-02	Rifaximin	NR1I2	4	16.6261	111.519	-4.7792	s-cd47-WT_JUR-1	NCGC00271415-02	-3	26.3506	92.434	-4.5792	-0.2	19.085	0.872545
s-cd47-CD47-1	NCGC00015205-07	PK-11195	NR1I3	-3	23.485	64.946	-4.6292	s-cd47-WT_JUR-1	NCGC00015205-07	4	29.5659	79.113	-4.5292	-0.1	-14.167	-1.1565
s-cd47-CD47-1	NCGC00163107-06	CITCO	NR1I3	4	9.3495	89.931	-5.0292	s-cd47-WT_JUR-1	NCGC00163107-06	4	0.0037	98.155	-8.4292	3.4	-8.224	-0.79386
s-cd47-CD47-1	NCGC00018296-08	Meclizine hydrochloride	NR1I3	-3	23.485	47.256	-4.6292	s-cd47-WT_JUR-1	NCGC00018296-08	-3	26.3506	38.445	-4.5792	-0.05	8.811	0.245622
s-cd47-CD47-1	NCGC00091019-08	Dexamethasone	NR3C1	1.1	0.0094	112.628	-8.0292	s-cd47-WT_JUR-1	NCGC00091019-08	4	0.0094	105.394	-8.0292	0	7.234	0.149393
s-cd47-CD47-1	NCGC00159559-01	Eplerenone	NR3C2	4	0.3317	109.595	-6.4792	s-cd47-WT_JUR-1	NCGC00159559-01	4	0.0235	116.174	-7.6292	1.15	-6.579	-0.693481
s-cd47-CD47-1	NCGC00081778-04	SID 7969543	NR5A1	-3	20.931	70.17	-4.6792	s-cd47-WT_JUR-1	NCGC00081778-04	-3	33.1734	69.712	-4.4792	-0.2	0.458	-0.264081
s-cd47-CD47-1	NCGC00242505-01	Deacetyl cortivazol	NRC31	-2.1	18.6548	2.253	-4.7292	s-cd47-WT_JUR-1	NCGC00242505-01	-2.1	26.3506	3.113	-4.5792	-0.15	-0.86	-0.344506
s-cd47-CD47-1	NCGC00242504-01	Cortivazol	NRC31	-1.1	3.7221	2.15	-5.4292	s-cd47-WT_JUR-1	NCGC00242504-01	-1.1	3.3173	2.287	-5.4792	0.05	-0.137	-0.300388
s-cd47-CD47-1	NCGC00165782-02	GW 4869	NSMAF	4		104.707		s-cd47-WT_JUR-1	NCGC00165782-02	4	0.0209	106.661	-7.6792	7.6792	-1.954	-0.411262
s-cd47-CD47-1	NCGC00250381-02	AZ-23	NTRK1	-3	29.5659	52.233	-4.5292	s-cd47-WT_JUR-1	NCGC00250381-02	-3	33.1734	64.46	-4.4792	-0.05	-12.227	-1.03812
s-cd47-CD47-1	NCGC00161398-01	GW-441756	NTRK1	-2.4	2.0931	93.579	-5.6792	s-cd47-WT_JUR-1	NCGC00161398-01	4	0.1482	96.295	-6.8292	1.15	-2.716	-0.45776
s-cd47-CD47-1	NCGC00346936-01	GNF-5837	NTRK1	-2.1	14.818	-0.092	-4.8292	s-cd47-WT_JUR-1	NCGC00346936-01	-2.1	11.7704	1.166	-4.9292	0.1	-1.258	-0.368792
s-cd47-CD47-1	NCGC00015316-06	Eflornithine Hydrochloride	ODC1	4	7.4266	105.406	-5.1292	s-cd47-WT_JUR-1	NCGC00015316-06	4	0.7427	96.637	-6.1292	1	8.769	0.243059
s-cd47-CD47-1	NCGC00346641-01	ADL-5859	OPRD1	4	0.5899	86.596	-6.2292	s-cd47-WT_JUR-1	NCGC00346641-01	-3	23.485	77.644	-4.6292	-1.6	8.952	0.254226
s-cd47-CD47-1	NCGC00346593-01	Matrine	OPRK1	2.4	0.059	125.506	-7.2292	s-cd47-WT_JUR-1	NCGC00346593-01	1.4	0.0013	107.912	-8.8792	1.65	17.594	0.781564
s-cd47-CD47-1	NCGC00344513-01	J113397	OPRL1	4	14.818	78.435	-4.8292	s-cd47-WT_JUR-1	NCGC00344513-01	4		89.914		-4.8292	-11.479	-0.992481
s-cd47-CD47-1	NCGC00161418-02	JTC-801	OPRL1	-1.1	4.1763	3.255	-5.3792	s-cd47-WT_JUR-1	NCGC00161418-02	-1.1	4.1763	4.168	-5.3792	0	-0.913	-0.34774
s-cd47-CD47-1	NCGC00346896-01	MCOPPB	OPRL1	-2.1	20.931	3.938	-4.6792	s-cd47-WT_JUR-1	NCGC00346896-01	-2.1	13.2066	4.666	-4.8792	0.2	-0.728	-0.336451
s-cd47-CD47-1	NCGC00346596-01	Oxymatrine	OPRM1	1.4	0.0047	112.882	-8.3292	s-cd47-WT_JUR-1	NCGC00346596-01	4	0.0033	109.765	-8.4792	0.15	3.117	-0.101828
s-cd47-CD47-1	NCGC00015608-04	Loperamide hydrochloride	OPRM1	-2.1	18.6548	8.237	-4.7292	s-cd47-WT_JUR-1	NCGC00015608-04	-2.1	26.3506	3.988	-4.5792	-0.15	4.249	-0.0327528
s-cd47-CD47-1	NCGC00024427-03	Naltrexone hydrochloride	OPRM1	4	0.7427	116.618	-6.1292	s-cd47-WT_JUR-1	NCGC00024427-03	4	2.6351	108.665	-5.5792	-0.55	7.953	0.193267
s-cd47-CD47-1	NCGC00347903-01	Ro 51	P2RX3	-1.2	10.4904	35.756	-4.9792	s-cd47-WT_JUR-1	NCGC00347903-01	-1.1	11.7704	4.309	-4.9292	-0.05	31.447	1.62688
s-cd47-CD47-1	NCGC00347907-01	A 804598	P2RX7	-2.4	7.4266	28.291	-5.1292	s-cd47-WT_JUR-1	NCGC00347907-01	-3	37.2212	47.249	-4.4292	-0.7	-18.958	-1.44885
s-cd47-CD47-1	NCGC00347906-01	A 438079	P2RX7	4	0.0019	90.132	-8.7292	s-cd47-WT_JUR-1	NCGC00347906-01	4	0.0026	104.589	-8.5792	-0.15	-14.457	-1.1742
s-cd47-CD47-1	NCGC00347905-01	AZ 10606120	P2RX7	-2.1	23.485	2.499	-4.6292	s-cd47-WT_JUR-1	NCGC00347905-01	-2.1	20.931	3.305	-4.6792	0.05	-0.806	-0.341211
s-cd47-CD47-1	NCGC00347908-01	A 740003	P2RX7	-3	37.2212	61.202	-4.4292	s-cd47-WT_JUR-1	NCGC00347908-01	-3	26.3506	60.152	-4.5792	0.15	1.05	-0.227957
s-cd47-CD47-1	NCGC00347909-01	A 839977	P2RX7	4		90.901		s-cd47-WT_JUR-1	NCGC00347909-01	4		84.291		0	6.61	0.111316
s-cd47-CD47-1	NCGC00347904-01	AZ 11645373	P2RX7	-1.1	3.3173	35.262	-5.4792	s-cd47-WT_JUR-1	NCGC00347904-01	-2.1	20.931	3.025	-4.6792	-0.8	32.237	1.67509
s-cd47-CD47-1	NCGC00346721-01	GW-791343	P2RX7	-2.1	23.485	37.839	-4.6292	s-cd47-WT_JUR-1	NCGC00346721-01	-3	33.1734	3.378	-4.4792	-0.15	34.461	1.81079
s-cd47-CD47-1	NCGC00016872-09	Ticlopidine hydrochloride	P2RY12	4	0.0662	92.613	-7.1792	s-cd47-WT_JUR-1	NCGC00016872-09	4	0.0019	105.917	-8.7292	1.55	-13.304	-1.10384
s-cd47-CD47-1	NCGC00163329-04	Clopidogrel bisulfate	P2RY12	4	13.2066	88.675	-4.8792	s-cd47-WT_JUR-1	NCGC00163329-04	4	11.7704	97.962	-4.9292	0.05	-9.287	-0.858724
s-cd47-CD47-1	NCGC00188690-02	Prasugrel	P2RY12	-2.2	5.8992	70.802	-5.2292	s-cd47-WT_JUR-1	NCGC00188690-02	-2.2	5.8992	56.949	-5.2292	0	13.853	0.553287
s-cd47-CD47-1	NCGC00343773-01	YW3-56	PADI1	-2.1	16.6261	0.797	-4.7792	s-cd47-WT_JUR-1	NCGC00343773-01	-2.1	14.818	1.832	-4.8292	0.05	-1.035	-0.355184
s-cd47-CD47-1	NCGC00186047-02	IPA-3	PAK1	-2.1	11.7704	-0.103	-4.9292	s-cd47-WT_JUR-1	NCGC00186047-02	-1.1	9.3495	0.953	-5.0292	0.1	-1.056	-0.356466
s-cd47-CD47-1	NCGC00345784-01	PF-3758309	PAK4	-2.2	2.6351	15.08	-5.5792	s-cd47-WT_JUR-1	NCGC00345784-01	-2.1	5.8992	1.259	-5.2292	-0.35	13.821	0.551334
s-cd47-CD47-1	NCGC00263108-01	Vorapaxar	PAR1	-2.2	16.6261	60.02	-4.7792	s-cd47-WT_JUR-1	NCGC00263108-01	-2.2	18.6548	69.564	-4.7292	-0.05	-9.544	-0.874407
s-cd47-CD47-1	NCGC00025225-02	SCH-79797	PAR1	-1.3	1.6626	0.685	-5.7792	s-cd47-WT_JUR-1	NCGC00025225-02	-1.1	1.8655	2.122	-5.7292	-0.05	-1.437	-0.379715
s-cd47-CD47-1	NCGC00263107-01	GB 83	PAR2	-2.4	7.4266	71.392	-5.1292	s-cd47-WT_JUR-1	NCGC00263107-01	-2.2	7.4266	62.958	-5.1292	0	8.434	0.222617
s-cd47-CD47-1	NCGC00250404-01	Veliparib	PARP1	4	33.1734	71.993	-4.4792	s-cd47-WT_JUR-1	NCGC00250404-01	1.2	0.0019	97.896	-8.7292	4.25	-25.903	-1.87264
s-cd47-CD47-1	NCGC00263173-03	Rucaparib	PARP1	4	37.2212	78.768	-4.4292	s-cd47-WT_JUR-1	NCGC00263173-03	4	0.0019	95.214	-8.7292	4.3	-16.446	-1.29557
s-cd47-CD47-1	NCGC00168108-02	AG-14361	PARP1	-2.2	23.485	35.992	-4.6292	s-cd47-WT_JUR-1	NCGC00168108-02	-3	37.2212	45.355	-4.4292	-0.2	-9.363	-0.863362
s-cd47-CD47-1	NCGC00346576-01	A-966492	PARP1	4	0.0469	98.133	-7.3292	s-cd47-WT_JUR-1	NCGC00346576-01	-2.4	8.3328	89.809	-5.0792	-2.25	8.324	0.215905
s-cd47-CD47-1	NCGC00263096-01	Iniparib	PARP1	4	4.6859	88.205	-5.3292	s-cd47-WT_JUR-1	NCGC00263096-01	4	18.6548	73.226	-4.7292	-0.6	14.979	0.621996
s-cd47-CD47-1	NCGC00015034-02	INO-1001	PARP1	4	0.0118	130.285	-7.9292	s-cd47-WT_JUR-1	NCGC00015034-02	4		106.954		-7.9292	23.331	1.13164
s-cd47-CD47-1	NCGC00238451-01	Olaparib	PARP1	1.4	0.0023	90.538	-8.6292	s-cd47-WT_JUR-1	NCGC00238451-01	1.4	0.0012	63.542	-8.9292	0.3	26.996	1.35528
s-cd47-CD47-1	NCGC00346435-01	Niraparib	PARP1	4	13.2066	81.286	-4.8792	s-cd47-WT_JUR-1	NCGC00346435-01	-2.2	23.485	48.69	-4.6292	-0.25	32.596	1.69699
s-cd47-CD47-1	NCGC00263130-01	cPEPCK inhibitor	PCK1	-2.2	18.6548	67.53	-4.7292	s-cd47-WT_JUR-1	NCGC00263130-01	-2.2	18.6548	64.682	-4.7292	0	2.848	-0.118242
s-cd47-CD47-1	NCGC00018204-11	Vinpocetine	PDE1	-2.1	11.7704	2.019	-4.9292	s-cd47-WT_JUR-1	NCGC00018204-11	-2.1	11.7704	3.55	-4.9292	0	-1.531	-0.38545
s-cd47-CD47-1	NCGC00015810-13	Papaverine hydrochloride	PDE10A	-2.1	26.3506	31.568	-4.5792	s-cd47-WT_JUR-1	NCGC00015810-13	-2.2	33.1734	55.025	-4.4792	-0.1	-23.457	-1.72338
s-cd47-CD47-1	NCGC00346630-01	MP-10	PDE10A	-2.2	16.6261	55.309	-4.7792	s-cd47-WT_JUR-1	NCGC00346630-01	-2.2	14.818	50.632	-4.8292	0.05	4.677	-0.00663609
s-cd47-CD47-1	NCGC00346939-01	PF-8380	PDE2A	4	0.0105	100.651	-7.9792	s-cd47-WT_JUR-1	NCGC00346939-01	4		107.776		-7.9792	-7.125	-0.726798
s-cd47-CD47-1	NCGC00263226-01	BAY-60-7550	PDE2A	4	37.2212	105.493	-4.4292	s-cd47-WT_JUR-1	NCGC00263226-01	4	5.2576	109.649	-5.2792	0.85	-4.156	-0.545629
s-cd47-CD47-1	NCGC00274063-01	Pimobendan	PDE3A	4		102.949		s-cd47-WT_JUR-1	NCGC00274063-01	4	0.0469	111.642	-7.3292	7.3292	-8.693	-0.822478
s-cd47-CD47-1	NCGC00161408-02	anagrelide	PDE3A	-2.2	20.931	72.363	-4.6792	s-cd47-WT_JUR-1	NCGC00161408-02	-2.2	18.6548	79.62	-4.7292	0.05	-7.257	-0.734853
s-cd47-CD47-1	NCGC00015675-03	Milrinone	PDE3A	4	37.2212	96.326	-4.4292	s-cd47-WT_JUR-1	NCGC00015675-03	4	0.3722	103.382	-6.4292	2	-7.056	-0.722588
s-cd47-CD47-1	NCGC00162385-05	Olprinone	PDE3A	1.4	0.0019	82.961	-8.7292	s-cd47-WT_JUR-1	NCGC00162385-05	4	0.0235	84.349	-7.6292	-1.1	-1.388	-0.376725
s-cd47-CD47-1	NCGC00015207-11	Cilostazol	PDE3A	4	0.0094	105.188	-8.0292	s-cd47-WT_JUR-1	NCGC00015207-11	4	0.003	100.522	-8.5292	0.5	4.666	-0.00730732
s-cd47-CD47-1	NCGC00345792-01	AN2728	PDE4A	-3	37.2212	60.41	-4.4292	s-cd47-WT_JUR-1	NCGC00345792-01	4	37.2212	86.145	-4.4292	0	-25.735	-1.86239
s-cd47-CD47-1	NCGC00346620-01	GSK-256066	PDE4A	4	5.1237	78.042	-5.2904	s-cd47-WT_JUR-1	NCGC00346620-01	4	18.1796	87.554	-4.7404	-0.55	-9.512	-0.872454
s-cd47-CD47-1	NCGC00016467-05	Luteolin	PDE4A	4	0.935	87.983	-6.0292	s-cd47-WT_JUR-1	NCGC00016467-05	4	2.6351	97.072	-5.5792	-0.45	-9.089	-0.846642
s-cd47-CD47-1	NCGC00168459-04	NCGC00168459-01	PDE4A	-1.1	9.3495	2.93	-5.0292	s-cd47-WT_JUR-1	NCGC00168459-04	-1.1	9.3495	4.669	-5.0292	0	-1.739	-0.398143
s-cd47-CD47-1	NCGC00250085-01	NVP-ABE171	PDE4A	-2.1	23.485	2.554	-4.6292	s-cd47-WT_JUR-1	NCGC00250085-01	-3	29.5659	3.786	-4.5292	-0.1	-1.232	-0.367205
s-cd47-CD47-1	NCGC00249759-02	NCGC00249759-01	PDE4A	4	11.7704	97.298	-4.9292	s-cd47-WT_JUR-1	NCGC00249759-02	4	0.935	98.069	-6.0292	1.1	-0.771	-0.339075
s-cd47-CD47-1	NCGC00016023-17	Theobromine	PDE4A	-2.1	13.2066	2.942	-4.8792	s-cd47-WT_JUR-1	NCGC00016023-17	-2.1	14.818	3.527	-4.8292	-0.05	-0.585	-0.327725
s-cd47-CD47-1	NCGC00345018-01	D-159687	PDE4A	-2.2	18.6548	59.2	-4.7292	s-cd47-WT_JUR-1	NCGC00345018-01	-2.2	16.6261	58.48	-4.7792	0.05	0.72	-0.248094
s-cd47-CD47-1	NCGC00016899-04	S-(+)-Rolipram	PDE4A	-3	37.2212	9.348	-4.4292	s-cd47-WT_JUR-1	NCGC00016899-04	-3	37.2212	4.058	-4.4292	0	5.29	0.0307694
s-cd47-CD47-1	NCGC00167520-03	Cilomilast	PDE4A	1.4	0.0833	114.169	-7.0792	s-cd47-WT_JUR-1	NCGC00167520-03	4		105.857		-7.0792	8.312	0.215173
s-cd47-CD47-1	NCGC00015898-12	Rolipram	PDE4A	4		114.464		s-cd47-WT_JUR-1	NCGC00015898-12	4	0.0332	105.708	-7.4792	7.4792	8.756	0.242266
s-cd47-CD47-1	NCGC00346566-01	Roflumilast	PDE4A	4		110.697		s-cd47-WT_JUR-1	NCGC00346566-01	4		92.194		0	18.503	0.837031
s-cd47-CD47-1	NCGC00263118-01	Lirimilast	PDE4A	-2.4	16.6261	87.201	-4.7792	s-cd47-WT_JUR-1	NCGC00263118-01	-3	23.485	61.864	-4.6292	-0.15	25.337	1.25404
s-cd47-CD47-1	NCGC00168781-01	Tadalafil	PDE5A	-3	26.3506	65.646	-4.5792	s-cd47-WT_JUR-1	NCGC00168781-01	4	3.7221	96.597	-5.4292	0.85	-30.951	-2.18067
s-cd47-CD47-1	NCGC00095099-04	Sildenafil citrate	PDE5A	-2.2	18.6548	43.726	-4.7292	s-cd47-WT_JUR-1	NCGC00095099-04	-2.2	16.6261	62.721	-4.7792	0.05	-18.995	-1.45111
s-cd47-CD47-1	NCGC00015385-12	Dipyridamole	PDE5A	-2.1	23.485	18.861	-4.6292	s-cd47-WT_JUR-1	NCGC00015385-12	-2.1	20.931	25.837	-4.6792	0.05	-6.976	-0.717706
s-cd47-CD47-1	NCGC00167533-03	Vardenafil	PDE5A	-1.1	3.3173	0.81	-5.4792	s-cd47-WT_JUR-1	NCGC00167533-03	-1.1	2.3485	2.104	-5.6292	0.15	-1.294	-0.370989
s-cd47-CD47-1	NCGC00346449-01	Parogrelil	PDE5A	-1.1	10.4904	1.982	-4.9792	s-cd47-WT_JUR-1	NCGC00346449-01	-2.1	10.4904	3.265	-4.9792	0	-1.283	-0.370317
s-cd47-CD47-1	NCGC00346592-01	Icariin	PDE5A	-2.1	16.6261	15.706	-4.7792	s-cd47-WT_JUR-1	NCGC00346592-01	-2.1	16.6261	5.465	-4.7792	0	10.241	0.332881
s-cd47-CD47-1	NCGC00263158-01	Amuvatinib	PDGFRA	-2.2	5.3954	50.839	-5.268	s-cd47-WT_JUR-1	NCGC00263158-01	-2.2	6.0538	48.285	-5.218	-0.05	2.554	-0.136182
s-cd47-CD47-1	NCGC00346619-01	PP-121	PDGFRA	-2.1	3.3173	10.172	-5.4792	s-cd47-WT_JUR-1	NCGC00346619-01	-1.1	1.6626	2.869	-5.7792	0.3	7.303	0.153603
s-cd47-CD47-1	NCGC00346658-01	Crenolanib	PDGFRB	-2.2	14.818	0.705	-4.8292	s-cd47-WT_JUR-1	NCGC00346658-01	-1.2	2.6351	0.975	-5.5792	0.75	-0.27	-0.308504
s-cd47-CD47-1	NCGC00346718-01	CP-673451	PDGFRB	-2.1	18.6548	1.177	-4.7292	s-cd47-WT_JUR-1	NCGC00346718-01	-2.1	18.6548	0.268	-4.7292	0	0.909	-0.236561
s-cd47-CD47-1	NCGC00263159-01	OSI-930	PDGFRB	-2.1	20.931	25.795	-4.6792	s-cd47-WT_JUR-1	NCGC00263159-01	-2.1	16.6261	12.813	-4.7792	0.1	12.982	0.500138
s-cd47-CD47-1	NCGC00263231-01	PDHK RIKEN	PDK2	-3	48.0869	57.713	-4.318	s-cd47-WT_JUR-1	NCGC00263231-01	-2.2	42.8575	48.01	-4.368	0.05	9.703	0.300052
s-cd47-CD47-1	NCGC00250391-01	AZD-7545	PDK2	-1.4	3.3173	79.06	-5.4792	s-cd47-WT_JUR-1	NCGC00250391-01	-2.2	5.8992	63.86	-5.2292	-0.25	15.2	0.635481
s-cd47-CD47-1	NCGC00346947-01	PDK1 inhibitor	PDPK1	-3	26.3506	42.853	-4.5792	s-cd47-WT_JUR-1	NCGC00346947-01	-3	33.1734	50.582	-4.4792	-0.1	-7.729	-0.763655
s-cd47-CD47-1	NCGC00346836-01	GSK-2334470	PDPK1	-2.1	20.931	0.092	-4.6792	s-cd47-WT_JUR-1	NCGC00346836-01	-2.1	23.485	0.869	-4.6292	-0.05	-0.777	-0.339441
s-cd47-CD47-1	NCGC00346490-01	OSU-03012	PDPK1	-2.1	14.818	-1.452	-4.8292	s-cd47-WT_JUR-1	NCGC00346490-01	-2.1	7.4266	-0.961	-5.1292	0.3	-0.491	-0.321989
s-cd47-CD47-1	NCGC00346687-01	BX-912	PDPK1	-2.1	18.6548	32.052	-4.7292	s-cd47-WT_JUR-1	NCGC00346687-01	-2.1	14.818	18.998	-4.8292	0.1	13.054	0.504531
s-cd47-CD47-1	NCGC00346547-01	PHT-427	PDPK1	-3	37.2212	82.75	-4.4292	s-cd47-WT_JUR-1	NCGC00346547-01	-3	26.3506	63.299	-4.5792	0.15	19.451	0.894879
s-cd47-CD47-1	NCGC00346590-01	Artenimol	PfATP6	-2.1	5.8992	1.561	-5.2292	s-cd47-WT_JUR-1	NCGC00346590-01	-1.1	2.3485	6.283	-5.6292	0.4	-4.722	-0.580166
s-cd47-CD47-1	NCGC00164600-03	Artesunate (AS)	PfATP6	-2.1	14.818	2.125	-4.8292	s-cd47-WT_JUR-1	NCGC00164600-03	-1.1	2.3485	4.001	-5.6292	0.8	-1.876	-0.406503
s-cd47-CD47-1	NCGC00263270-01	BTM-2C-dimer allyl oxime	PfATP6	-1.2	0.0935	46.685	-7.0292	s-cd47-WT_JUR-1	NCGC00263270-01	-1.2	0.0662	45.296	-7.1792	0.15	1.389	-0.207271
s-cd47-CD47-1	NCGC00164591-02	Artemether	PfATP6	-1.2	0.6619	67.487	-6.1792	s-cd47-WT_JUR-1	NCGC00164591-02	-1.2	1.8655	61.89	-5.7292	-0.45	5.597	0.0495026
s-cd47-CD47-1	NCGC00161634-07	Artemisinin	PfATP6	-1.2	0.3317	69.485	-6.4792	s-cd47-WT_JUR-1	NCGC00161634-07	-1.2	0.3722	58.078	-6.4292	-0.05	11.407	0.404031
s-cd47-CD47-1	NCGC00263265-01	ASR-isobudimer-SO2Ph-4-CH2OC(O)NMe2	PfATP6	-1.2	0.0662	50.082	-7.1792	s-cd47-WT_JUR-1	NCGC00263265-01	-1.1	0.0833	27.802	-7.0792	-0.1	22.28	1.06751
s-cd47-CD47-1	NCGC00263268-01	BTM-2C-dimer ketone	PfATP6	-1.2	0.1177	61.349	-6.9292	s-cd47-WT_JUR-1	NCGC00263268-01	-1.1	0.1321	28.3	-6.8792	-0.05	33.049	1.72463
s-cd47-CD47-1	NCGC00263233-01	IPFK2	PFKFB2	-1.2	1.3207	32.061	-5.8792	s-cd47-WT_JUR-1	NCGC00263233-01	-1.1	0.935	19.874	-6.0292	0.15	12.187	0.451627
s-cd47-CD47-1	NCGC00015785-04	Progesterone	PGR	4		8.371		s-cd47-WT_JUR-1	NCGC00015785-04	-3	29.5659	20.317	-4.5292	4.5292	-11.946	-1.02098
s-cd47-CD47-1	NCGC00346502-01	Dienogest	PGR	1.3	0.0118	86.762	-7.9292	s-cd47-WT_JUR-1	NCGC00346502-01	4		94.418		-7.9292	-7.656	-0.7592
s-cd47-CD47-1	NCGC00159349-07	Levonorgestrel	PGR	4	1.049	87.846	-5.9792	s-cd47-WT_JUR-1	NCGC00159349-07	4	7.4266	85.66	-5.1292	-0.85	2.186	-0.158638
s-cd47-CD47-1	NCGC00164590-03	Drospirenone	PGR	1.3	0.0372	82.495	-7.4292	s-cd47-WT_JUR-1	NCGC00164590-03	4	14.818	78.158	-4.8292	-2.6	4.337	-0.027383
s-cd47-CD47-1	NCGC00022037-06	Medroxyprogesterone acetate	PGR	4		47.433		s-cd47-WT_JUR-1	NCGC00022037-06	-2.2	20.931	41.269	-4.6792	4.6792	6.164	0.0841012
s-cd47-CD47-1	NCGC00024196-06	Megestrol acetate	PGR	4		15.899		s-cd47-WT_JUR-1	NCGC00024196-06	-2.1	18.6548	8.328	-4.7292	4.7292	7.571	0.169957
s-cd47-CD47-1	NCGC00263565-02	Gestodene	PGR	4		102.06		s-cd47-WT_JUR-1	NCGC00263565-02	1.2	0.0047	94.099	-8.3292	8.3292	7.961	0.193755
s-cd47-CD47-1	NCGC00095023-04	Ethisterone	PGR	4		112.16		s-cd47-WT_JUR-1	NCGC00095023-04	4	23.485	91.907	-4.6292	4.6292	20.253	0.943817
s-cd47-CD47-1	NCGC00025179-13	Mifepristone	PGR	-1.3	0.001	38.548	-8.9792	s-cd47-WT_JUR-1	NCGC00025179-13	-1.1	1.3207	7.203	-5.8792	-3.1	31.345	1.62065
s-cd47-CD47-1	NCGC00346503-01	Perifosine	PIK3CA	-3		81.938		s-cd47-WT_JUR-1	NCGC00346503-01	4	18.1796	92.855	-4.7404	4.7404	-10.917	-0.958188
s-cd47-CD47-1	NCGC00345849-01	NIBR-17	PIK3CA	-2.2	16.6261	27.61	-4.7792	s-cd47-WT_JUR-1	NCGC00345849-01	-2.1	16.6261	30.154	-4.7792	0	-2.544	-0.447264
s-cd47-CD47-1	NCGC00263088-01	BAG-956	PIK3CA	-2.1	5.8992	-1.621	-5.2292	s-cd47-WT_JUR-1	NCGC00263088-01	-2.1	3.7221	0.066	-5.4292	0.2	-1.687	-0.39497
s-cd47-CD47-1	NCGC00346649-01	PKI-402	PIK3CA	-2.1	0.5899	1.429	-6.2292	s-cd47-WT_JUR-1	NCGC00346649-01	-2.1	0.2957	3.003	-6.5292	0.3	-1.574	-0.388074
s-cd47-CD47-1	NCGC00346717-01	BYL-719	PIK3CA	-2.2	16.6261	27.621	-4.7792	s-cd47-WT_JUR-1	NCGC00346717-01	-2.1	16.6261	29.049	-4.7792	0	-1.428	-0.379165
s-cd47-CD47-1	NCGC00263223-01	CAY10626	PIK3CA	-2.1	6.619	0.819	-5.1792	s-cd47-WT_JUR-1	NCGC00263223-01	-2.1	1.049	2.205	-5.9792	0.8	-1.386	-0.376603
s-cd47-CD47-1	NCGC00346681-01	NVP-BGT226	PIK3CA	-1.2	0.5258	0.026	-6.2792	s-cd47-WT_JUR-1	NCGC00346681-01	-1.1	0.0662	1.243	-7.1792	0.9	-1.217	-0.36629
s-cd47-CD47-1	NCGC00346457-01	BAY-80-6946	PIK3CA	-1.2	0.4567	44.569	-6.3404	s-cd47-WT_JUR-1	NCGC00346457-01	-2.2	1.6203	45.708	-5.7904	-0.55	-1.139	-0.361531
s-cd47-CD47-1	NCGC00345447-02	3-Methyladenine	PIK3CA	-1.1	0.5899	5.5	-6.2292	s-cd47-WT_JUR-1	NCGC00345447-02	-1.1	0.1321	2.524	-6.8792	0.65	2.976	-0.110432
s-cd47-CD47-1	NCGC00346624-01	A-66	PIK3CA	-2.2	18.6548	63.955	-4.7292	s-cd47-WT_JUR-1	NCGC00346624-01	-2.4	16.6261	60.425	-4.7792	0.05	3.53	-0.0766264
s-cd47-CD47-1	NCGC00250408-01	GSK-2126458	PIK3CA	-1.1	0.059	4.645	-7.2292	s-cd47-WT_JUR-1	NCGC00250408-01	-1.1	0.0526	0.938	-7.2792	0.05	3.707	-0.0658258
s-cd47-CD47-1	NCGC00015622-02	LY-294002	PIK3CA	-2.2	18.6548	52.767	-4.7292	s-cd47-WT_JUR-1	NCGC00015622-02	-2.2	18.6548	46.735	-4.7292	0	6.032	0.0760465
s-cd47-CD47-1	NCGC00346484-01	ZSTK-474	PIK3CA	-1.1	0.6619	19.546	-6.1792	s-cd47-WT_JUR-1	NCGC00346484-01	-1.1	1.177	12.202	-5.9292	-0.25	7.344	0.156105
s-cd47-CD47-1	NCGC00346692-01	CUDC-907	PIK3CA	-1.1	0.0037	9.836	-8.4292	s-cd47-WT_JUR-1	NCGC00346692-01	-1.2	0.0019	1.108	-8.7292	0.3	8.728	0.240557
s-cd47-CD47-1	NCGC00345837-01	GNE-490	PIK3CA	-2.2	6.619	55.905	-5.1792	s-cd47-WT_JUR-1	NCGC00345837-01	-2.2	13.2066	45.261	-4.8792	-0.3	10.644	0.357472
s-cd47-CD47-1	NCGC00187906-01	PI-103	PIK3CA	-1.2	0.4286	30.058	-6.368	s-cd47-WT_JUR-1	NCGC00187906-01	-1.3	0.7621	19.176	-6.118	-0.25	10.882	0.371995
s-cd47-CD47-1	NCGC00187482-03	GDC-0941	PIK3CA	-1.2	2.9566	28.467	-5.5292	s-cd47-WT_JUR-1	NCGC00187482-03	-2.1	16.6261	16.129	-4.7792	-0.75	12.338	0.460841
s-cd47-CD47-1	NCGC00346508-01	TG-100115	PIK3CA	-2.1	20.931	29.827	-4.6792	s-cd47-WT_JUR-1	NCGC00346508-01	-2.1	26.3506	16.174	-4.5792	-0.1	13.653	0.541083
s-cd47-CD47-1	NCGC00346614-01	PIK-294	PIK3CA	-1.1	1.6626	15.325	-5.7792	s-cd47-WT_JUR-1	NCGC00346614-01	-1.1	1.3207	1.643	-5.8792	0.1	13.682	0.542852
s-cd47-CD47-1	NCGC00346659-01	PF-04691502	PIK3CA	-1.2	0.0833	21.168	-7.0792	s-cd47-WT_JUR-1	NCGC00346659-01	-1.1	0.1177	7.183	-6.9292	-0.15	13.985	0.561341
s-cd47-CD47-1	NCGC00346492-01	XL-147	PIK3CA	-2.1	7.2374	30.668	-5.1404	s-cd47-WT_JUR-1	NCGC00346492-01	-2.1	11.4706	15.835	-4.9404	-0.2	14.833	0.613087
s-cd47-CD47-1	NCGC00346500-01	PIK-75	PIK3CA	-1.1	0.0209	17.282	-7.6792	s-cd47-WT_JUR-1	NCGC00346500-01	-1.1	0.0372	2.198	-7.4292	-0.25	15.084	0.628403
s-cd47-CD47-1	NCGC00346447-01	D-106669	PIK3CA	-1.3	1.4818	29.361	-5.8292	s-cd47-WT_JUR-1	NCGC00346447-01	-1.1	2.9566	14.094	-5.5292	-0.3	15.267	0.63957
s-cd47-CD47-1	NCGC00025288-03	Deguelin	PIK3CA	-2.2	0.2635	32.938	-6.5792	s-cd47-WT_JUR-1	NCGC00025288-03	-2.1	23.485	17.496	-4.6292	-1.95	15.442	0.650248
s-cd47-CD47-1	NCGC00346536-01	PIK-93	PIK3CA	-1.1	1.177	21.079	-5.9292	s-cd47-WT_JUR-1	NCGC00346536-01	-2.3	8.3328	5.052	-5.0792	-0.85	16.027	0.685945
s-cd47-CD47-1	NCGC00346509-01	GSK-615	PIK3CA	-1.1	0.3317	19.769	-6.4792	s-cd47-WT_JUR-1	NCGC00346509-01	-1.1	0.6619	3.042	-6.1792	-0.3	16.727	0.728659
s-cd47-CD47-1	NCGC00163485-03	Wortmannin	PIK3CA	-2.1	5.8992	26.434	-5.2292	s-cd47-WT_JUR-1	NCGC00163485-03	-2.1	13.2066	9.434	-4.8792	-0.35	17	0.745318
s-cd47-CD47-1	NCGC00238454-02	PIK-90	PIK3CA	-2.1	16.6261	28.047	-4.7792	s-cd47-WT_JUR-1	NCGC00238454-02	-2.1	23.485	10.212	-4.6292	-0.15	17.835	0.79627
s-cd47-CD47-1	NCGC00345783-01	17_-hydroxy Wortmannin	PIK3CA	-2.1	6.619	27.582	-5.1792	s-cd47-WT_JUR-1	NCGC00345783-01	-2.1	5.8992	8.798	-5.2292	0.05	18.784	0.854178
s-cd47-CD47-1	NCGC00262604-01	BKM-120	PIK3CA	-1.1	0.4686	25.278	-6.3292	s-cd47-WT_JUR-1	NCGC00262604-01	-1.1	0.4686	5.499	-6.3292	0	19.779	0.914893
s-cd47-CD47-1	NCGC00345851-01	GNE-477	PIK3CA	-1.2	0.2635	35.829	-6.5792	s-cd47-WT_JUR-1	NCGC00345851-01	-1.1	0.3722	15.345	-6.4292	-0.15	20.484	0.957913
s-cd47-CD47-1	NCGC00346650-01	CH-5132799	PIK3CA	-2.1	5.2576	32.385	-5.2792	s-cd47-WT_JUR-1	NCGC00346650-01	-2.1	8.3328	10.205	-5.0792	-0.2	22.18	1.0614
s-cd47-CD47-1	NCGC00345838-01	GNE-493	PIK3CA	-2.1	1.177	47.021	-5.9292	s-cd47-WT_JUR-1	NCGC00345838-01	-2.1	4.6859	18.068	-5.3292	-0.6	28.953	1.47469
s-cd47-CD47-1	NCGC00168114-03	IC-87114	PIK3CA	-1.2	1.177	35.263	-5.9292	s-cd47-WT_JUR-1	NCGC00168114-03	-2.1	5.8992	4.013	-5.2292	-0.7	31.25	1.61486
s-cd47-CD47-1	NCGC00346579-01	PIK-293	PIK3CA	-1.2	2.6351	50.9	-5.5792	s-cd47-WT_JUR-1	NCGC00346579-01	-1.2	3.3173	15.445	-5.4792	-0.1	35.455	1.87145
s-cd47-CD47-1	NCGC00263154-01	AZD-6482	PIK3CB	-2.2	34.0429	27.89	-4.468	s-cd47-WT_JUR-1	NCGC00263154-01	-2.1	34.0429	17.065	-4.468	0	10.825	0.368517
s-cd47-CD47-1	NCGC00346495-01	TGX-221	PIK3CB	-3	33.1734	40.352	-4.4792	s-cd47-WT_JUR-1	NCGC00346495-01	-3	29.5659	17.942	-4.5292	0.05	22.41	1.07544
s-cd47-CD47-1	NCGC00345796-01	GSK-2636771	PIK3CB	-2.2	9.3495	51.53	-5.0292	s-cd47-WT_JUR-1	NCGC00345796-01	-2.2	20.931	26.827	-4.6792	-0.35	24.703	1.21536
s-cd47-CD47-1	NCGC00262603-01	CAL-101	PIK3CD	-2.1	10.4904	32.28	-4.9792	s-cd47-WT_JUR-1	NCGC00262603-01	-1.1	5.8992	9.332	-5.2292	0.25	22.948	1.10827
s-cd47-CD47-1	NCGC00185997-03	AS-252424	PIK3CG	-2.2	16.6261	62.26	-4.7792	s-cd47-WT_JUR-1	NCGC00185997-03	-2.4	18.6548	67.383	-4.7292	-0.05	-5.123	-0.604636
s-cd47-CD47-1	NCGC00186030-03	AS-605240	PIK3CG	-2.2	8.1205	51.02	-5.0904	s-cd47-WT_JUR-1	NCGC00186030-03	-2.2	14.4406	49.48	-4.8404	-0.25	1.54	-0.198057
s-cd47-CD47-1	NCGC00186009-03	AS-604850	PIK3CG	-3	26.3506	54.886	-4.5792	s-cd47-WT_JUR-1	NCGC00186009-03	-2.2	23.485	51.814	-4.6292	0.05	3.072	-0.104574
s-cd47-CD47-1	NCGC00346625-01	CAY10505	PIK3CG	-3	23.485	68.648	-4.6292	s-cd47-WT_JUR-1	NCGC00346625-01	-2.2	20.931	53.293	-4.6792	0.05	15.355	0.644939
s-cd47-CD47-1	NCGC00346683-01	YM-201636	PIKFYVE	-2.1	16.6261	2.421	-4.7792	s-cd47-WT_JUR-1	NCGC00346683-01	-2.1	16.6261	3.272	-4.7792	0	-0.851	-0.343957
s-cd47-CD47-1	NCGC00263186-02	SGI-1776	PIM1	-2.1	20.931	1.323	-4.6792	s-cd47-WT_JUR-1	NCGC00263186-02	-2.1	23.485	2.582	-4.6292	-0.05	-1.259	-0.368853
s-cd47-CD47-1	NCGC00346935-01	CX-6258	PIM1	-2.1	16.6261	0.975	-4.7792	s-cd47-WT_JUR-1	NCGC00346935-01	-2.1	9.3495	1.933	-5.0292	0.25	-0.958	-0.350486
s-cd47-CD47-1	NCGC00345836-01	SMI-4a	PIM1	-3	37.2212	84.64	-4.4292	s-cd47-WT_JUR-1	NCGC00345836-01	-3	33.1734	83.486	-4.4792	0.05	1.154	-0.221611
s-cd47-CD47-1	NCGC00242499-01	Pim 1 inhibitor 2	PIM1	-2.2	13.2066	58.948	-4.8792	s-cd47-WT_JUR-1	NCGC00242499-01	-2.2	20.931	53.261	-4.6792	-0.2	5.687	0.0549945
s-cd47-CD47-1	NCGC00346465-01	GDC-0349	PIM3	-2.1	1.049	46.357	-5.9792	s-cd47-WT_JUR-1	NCGC00346465-01	-1.2	1.6626	44.412	-5.7792	-0.2	1.945	-0.173344
s-cd47-CD47-1	NCGC00185916-06	NCGC00185916	PKM2	4	23.485	70.045	-4.6292	s-cd47-WT_JUR-1	NCGC00185916-06	4	26.3506	80.834	-4.5792	-0.05	-10.789	-0.950377
s-cd47-CD47-1	NCGC00186528-04	NCGC00186528	PKM2	4		106.184		s-cd47-WT_JUR-1	NCGC00186528-04	4		95.312		0	10.872	0.371385
s-cd47-CD47-1	NCGC00346491-01	Varespladib	PLA2G5	4	4.1763	114.284	-5.3792	s-cd47-WT_JUR-1	NCGC00346491-01	4		116.87		-5.3792	-2.586	-0.449827
s-cd47-CD47-1	NCGC00346594-01	Oleanolic acid	PLA2G5	-2.2	16.6261	56.286	-4.7792	s-cd47-WT_JUR-1	NCGC00346594-01	-2.1	18.6548	26.521	-4.7292	-0.05	29.765	1.52424
s-cd47-CD47-1	NCGC00025091-04	U-73122??	PLCG1	4	16.6261	91.26	-4.7792	s-cd47-WT_JUR-1	NCGC00025091-04	4	16.6261	93.646	-4.7792	0	-2.386	-0.437623
s-cd47-CD47-1	NCGC00250389-01	CDIBA	PLCG1	-3	26.3506	88.751	-4.5792	s-cd47-WT_JUR-1	NCGC00250389-01	4	23.485	85.274	-4.6292	0.05	3.477	-0.0798605
s-cd47-CD47-1	NCGC00263112-01	GSK-461364A	PLK1	-1.1	0.0935	-0.554	-7.0292	s-cd47-WT_JUR-1	NCGC00263112-01	-1.1	0.059	1.102	-7.2292	0.2	-1.656	-0.393078
s-cd47-CD47-1	NCGC00253438-01	BI-2536	PLK1	-1.1	0.0526	1.558	-7.2792	s-cd47-WT_JUR-1	NCGC00253438-01	-1.1	0.0372	2.577	-7.4292	0.15	-1.019	-0.354208
s-cd47-CD47-1	NCGC00263087-01	Volasertib	PLK1	-1.1	0.3317	1.172	-6.4792	s-cd47-WT_JUR-1	NCGC00263087-01	-1.1	0.0662	2.177	-7.1792	0.7	-1.005	-0.353354
s-cd47-CD47-1	NCGC00242217-04	GW 843682X	PLK1	-1.2	1.3207	27.268	-5.8792	s-cd47-WT_JUR-1	NCGC00242217-04	-1.1	0.6619	24.126	-6.1792	0.3	3.142	-0.100302
s-cd47-CD47-1	NCGC00346511-01	ON-01910	PLK1	-1.1	0.1865	37.673	-6.7292	s-cd47-WT_JUR-1	NCGC00346511-01	-1.1	0.1321	16.562	-6.8792	0.15	21.111	0.996173
s-cd47-CD47-1	NCGC00346535-01	IVX-214	PLK1	-1.1	1.4818	32.053	-5.8292	s-cd47-WT_JUR-1	NCGC00346535-01	-1.1	0.4686	8.077	-6.3292	0.5	23.976	1.171
s-cd47-CD47-1	NCGC00181336-03	2-Fluoroadenosine	PNP	-1.1	1.3207	16.547	-5.8792	s-cd47-WT_JUR-1	NCGC00181336-03	-1.1	0.7427	3.45	-6.1292	0.25	13.097	0.507155
s-cd47-CD47-1	NCGC00160275-01	Resistomycin	POLR2A	-2.1	4.6859	4.298	-5.3292	s-cd47-WT_JUR-1	NCGC00160275-01	-1.1	1.177	3.335	-5.9292	0.6	0.963	-0.233266
s-cd47-CD47-1	NCGC00346627-01	CX-5461	POLR2A	-2.2	6.4504	106.109	-5.1904	s-cd47-WT_JUR-1	NCGC00346627-01	-2.2	12.8702	101.813	-4.8904	-0.3	4.296	-0.0298848
s-cd47-CD47-1	NCGC00163411-05	Triptolide	POLR2A	4	0.0059	65.405	-8.2292	s-cd47-WT_JUR-1	NCGC00163411-05	4		5.613		-8.2292	59.792	3.3565
s-cd47-CD47-1	NCGC00016794-14	Gemfibrozil	PPARA	4	0.0935	87.258	-7.0292	s-cd47-WT_JUR-1	NCGC00016794-14	4		108.581		-7.0292	-21.323	-1.59317
s-cd47-CD47-1	NCGC00015437-16	Fenofibrate	PPARA	-3	37.2212	33.288	-4.4292	s-cd47-WT_JUR-1	NCGC00015437-16	-2.2	20.931	45.3	-4.6792	0.25	-12.012	-1.025
s-cd47-CD47-1	NCGC00015257-06	Clofibrate	PPARA	4		100.62		s-cd47-WT_JUR-1	NCGC00015257-06	4	0.0332	104.025	-7.4792	7.4792	-3.405	-0.499803
s-cd47-CD47-1	NCGC00263123-01	MK-767	PPARA	4	16.6261	65.862	-4.7792	s-cd47-WT_JUR-1	NCGC00263123-01	-3	23.485	68.692	-4.6292	-0.15	-2.83	-0.464716
s-cd47-CD47-1	NCGC00165799-02	GW-6471	PPARA	-2.2	16.6261	36.938	-4.7792	s-cd47-WT_JUR-1	NCGC00165799-02	-2.1	16.6261	6.324	-4.7792	0	30.614	1.57605
s-cd47-CD47-1	NCGC00015480-13	GW-7647	PPARA	-2.2	20.931	50.573	-4.6792	s-cd47-WT_JUR-1	NCGC00015480-13	-2.1	23.485	4.907	-4.6292	-0.05	45.666	2.49453
s-cd47-CD47-1	NCGC00164447-01	Ciprofibrate	PPARA	4	48.0869	94.451	-4.318	s-cd47-WT_JUR-1	NCGC00164447-01	-2.1	48.0869	12.532	-4.318	0	81.919	4.7067
s-cd47-CD47-1	NCGC00092344-05	GW-0742	PPARD	4	0.0012	64.952	-8.9292	s-cd47-WT_JUR-1	NCGC00092344-05	-3	23.485	74.196	-4.6292	-4.3	-9.244	-0.856101
s-cd47-CD47-1	NCGC00263111-01	GSK-3787	PPARD	4		96.987		s-cd47-WT_JUR-1	NCGC00263111-01	4	0.0418	105.898	-7.3792	7.3792	-8.911	-0.835781
s-cd47-CD47-1	NCGC00241455-01	GW-501516	PPARD	4	0.0021	97.955	-8.6792	s-cd47-WT_JUR-1	NCGC00241455-01	4	23.485	75.948	-4.6292	-4.05	22.007	1.05085
s-cd47-CD47-1	NCGC00163128-07	Pioglitazone HCl	PPARG	4	37.2212	92.626	-4.4292	s-cd47-WT_JUR-1	NCGC00163128-07	-2.4	13.2066	100.059	-4.8792	0.45	-7.433	-0.745593
s-cd47-CD47-1	NCGC00095124-06	Rosiglitazone	PPARG	4	33.1734	101.571	-4.4792	s-cd47-WT_JUR-1	NCGC00095124-06	-3	23.485	85.79	-4.6292	0.15	15.781	0.670934
s-cd47-CD47-1	NCGC00347955-01	SR1664	PPARG	-2.2	18.6548	67.276	-4.7292	s-cd47-WT_JUR-1	NCGC00347955-01	-2.1	23.485	25.029	-4.6292	-0.1	42.247	2.2859
s-cd47-CD47-1	NCGC00095145-01	Cantharidin	PPP1CA	-1.1	2.6351	17.76	-5.5792	s-cd47-WT_JUR-1	NCGC00095145-01	-1.1	2.0931	12.325	-5.6792	0.1	5.435	0.0396173
s-cd47-CD47-1	NCGC00346600-01	Dioscin	PRDX1	-1.1	3.7221	2.798	-5.4292	s-cd47-WT_JUR-1	NCGC00346600-01	-1.1	2.0931	4.053	-5.6792	0.25	-1.255	-0.368609
s-cd47-CD47-1	NCGC00165736-02	Acadesine	PRKAA1	4	13.2066	119.483	-4.8792	s-cd47-WT_JUR-1	NCGC00165736-02	4	2.9566	120.229	-5.5292	0.65	-0.746	-0.33755
s-cd47-CD47-1	NCGC00016564-07	Metformin HCl	PRKAA1	4	0.0132	117.123	-7.8792	s-cd47-WT_JUR-1	NCGC00016564-07	4		107.78		-7.8792	9.343	0.278085
s-cd47-CD47-1	NCGC00250373-01	A-769662	PRKAA1	4		125.676		s-cd47-WT_JUR-1	NCGC00250373-01	-3	23.485	69.086	-4.6292	4.6292	56.59	3.16111
s-cd47-CD47-1	NCGC00347303-01	Englerin A	PRKCA	-2.1	23.485	1.526	-4.6292	s-cd47-WT_JUR-1	NCGC00347303-01	-2.1	29.5659	5.016	-4.5292	-0.1	-3.49	-0.504989
s-cd47-CD47-1	NCGC00163451-03	G?-6976	PRKCA	-1.1	0.935	1.655	-6.0292	s-cd47-WT_JUR-1	NCGC00163451-03	-1.1	1.049	2.78	-5.9792	-0.05	-1.125	-0.360676
s-cd47-CD47-1	NCGC00162381-03	Thapsigargin	PRKCA	-1.1	1.6626	0.285	-5.7792	s-cd47-WT_JUR-1	NCGC00162381-03	-2.1	13.2066	1.193	-4.8792	-0.9	-0.908	-0.347435
s-cd47-CD47-1	NCGC00262061-02	Ro-31-8425	PRKCA	-2.1	13.2066	0.895	-4.8792	s-cd47-WT_JUR-1	NCGC00262061-02	-1.1	10.4904	1.729	-4.9792	0.1	-0.834	-0.342919
s-cd47-CD47-1	NCGC00346806-01	Endoxifen	PRKCA	-2.1	18.6548	3.088	-4.7292	s-cd47-WT_JUR-1	NCGC00346806-01	-2.1	18.6548	3.435	-4.7292	0	-0.347	-0.313202
s-cd47-CD47-1	NCGC00241102-02	Midostaurin	PRKCA	-1.2	2.9566	54.65	-5.5292	s-cd47-WT_JUR-1	NCGC00241102-02	-1.2	3.3173	51.193	-5.4792	-0.05	3.457	-0.0810809
s-cd47-CD47-1	NCGC00345812-01	Ingenol mebutate	PRKCA	-1.2	0.0094	42.199	-8.0292	s-cd47-WT_JUR-1	NCGC00345812-01	-1.2	0.0083	36.315	-8.0792	0.05	5.884	0.0670155
s-cd47-CD47-1	NCGC00163505-03	G?-6983	PRKCA	-2.1	20.931	9.514	-4.6792	s-cd47-WT_JUR-1	NCGC00163505-03	-3	29.5659	2.768	-4.5292	-0.15	6.746	0.119615
s-cd47-CD47-1	NCGC00263095-01	Sotrastaurin	PRKCA	-3	26.3506	59.989	-4.5792	s-cd47-WT_JUR-1	NCGC00263095-01	-3	23.485	49.963	-4.6292	0.05	10.026	0.319762
s-cd47-CD47-1	NCGC00238452-02	Enzastaurin	PRKCA	-1.1	11.7704	40.303	-4.9292	s-cd47-WT_JUR-1	NCGC00238452-02	-1.1	11.7704	13.534	-4.9292	0	26.769	1.34143
s-cd47-CD47-1	NCGC00263119-01	Ruboxistaurin mesilate	PRKCB	-2.1	13.2066	0.028	-4.8792	s-cd47-WT_JUR-1	NCGC00263119-01	-2.1	18.6548	0.853	-4.7292	-0.15	-0.825	-0.34237
s-cd47-CD47-1	NCGC00250387-02	KU 0060648	PRKDC	-2.1	16.6261	-1.513	-4.7792	s-cd47-WT_JUR-1	NCGC00250387-02	-2.1	11.7704	-0.442	-4.9292	0.15	-1.071	-0.357381
s-cd47-CD47-1	NCGC00250377-01	NU-7441	PRKDC	-2.1	18.6548	6.54	-4.7292	s-cd47-WT_JUR-1	NCGC00250377-01	-2.1	16.6261	3.979	-4.7792	0.05	2.561	-0.135755
s-cd47-CD47-1	NCGC00022678-07	Rifampicin	PRKDC	4	1.6865	146.031	-5.773	s-cd47-WT_JUR-1	NCGC00022678-07	4	0.0085	137.533	-8.073	2.3	8.498	0.226523
s-cd47-CD47-1	NCGC00090762-03	Rifabutin	PRKDC	4		85.744		s-cd47-WT_JUR-1	NCGC00090762-03	-3	20.931	69.409	-4.6792	4.6792	16.335	0.704739
s-cd47-CD47-1	NCGC00025059-04	Actinomycin D	PRKDC	4	20.931	42.128	-4.6792	s-cd47-WT_JUR-1	NCGC00025059-04	4		2.014		-4.6792	40.114	2.15574
s-cd47-CD47-1	NCGC00167431-02	Rifapentine	PRKDC	-2.4	4.6859	52.75	-5.3292	s-cd47-WT_JUR-1	NCGC00167431-02	-1.1	6.619	2.402	-5.1792	-0.15	50.348	2.78022
s-cd47-CD47-1	NCGC00024594-01	Calpeptin	PSMD1	-2.2	20.931	37.411	-4.6792	s-cd47-WT_JUR-1	NCGC00024594-01	-2.2	20.931	44.392	-4.6792	0	-6.981	-0.718011
s-cd47-CD47-1	NCGC00345799-01	Oprozomib	PSMD1	-1.1	0.059	0.056	-7.2292	s-cd47-WT_JUR-1	NCGC00345799-01	-1.1	0.059	1.439	-7.2292	0	-1.383	-0.376419
s-cd47-CD47-1	NCGC00249611-03	Ixazomib	PSMD1	-1.1	0.0662	-0.188	-7.1792	s-cd47-WT_JUR-1	NCGC00249611-03	-1.1	0.0526	0.801	-7.2792	0.1	-0.989	-0.352377
s-cd47-CD47-1	NCGC00346469-01	Delanzomib	PSMD1	-1.1	0.0187	-0.64	-7.7292	s-cd47-WT_JUR-1	NCGC00346469-01	-1.1	0.0187	0.345	-7.7292	0	-0.985	-0.352133
s-cd47-CD47-1	NCGC00242506-02	Bortezomib	PSMD1	-1.1	0.0094	1.533	-8.0292	s-cd47-WT_JUR-1	NCGC00242506-02	-1.1	0.0094	2.405	-8.0292	0	-0.872	-0.345238
s-cd47-CD47-1	NCGC00249613-03	Carfilzomib	PSMD1	-1.1	0.0059	0.074	-8.2292	s-cd47-WT_JUR-1	NCGC00249613-03	-1.1	0.0047	0.797	-8.3292	0.1	-0.723	-0.336146
s-cd47-CD47-1	NCGC00161679-01	MG-132	PSMD1	-1.1	0.2957	2.215	-6.5292	s-cd47-WT_JUR-1	NCGC00161679-01	-1.1	0.2957	2.288	-6.5292	0	-0.073	-0.296483
s-cd47-CD47-1	NCGC00345815-01	MG-115	PSMD1	-1.1	0.7427	2.33	-6.1292	s-cd47-WT_JUR-1	NCGC00345815-01	-1.1	0.7427	2.329	-6.1292	0	0.001	-0.291967
s-cd47-CD47-1	NCGC00344630-01	Marizomib	PSMD1	-1.1	0.0083	3.182	-8.0792	s-cd47-WT_JUR-1	NCGC00344630-01	-1.1	0.0105	2.63	-7.9792	-0.1	0.552	-0.258345
s-cd47-CD47-1	NCGC00249612-01	Ixazomib citrate	PSMD1	-1.1	0.0332	3.064	-7.4792	s-cd47-WT_JUR-1	NCGC00249612-01	-1.1	0.0372	2.108	-7.4292	-0.05	0.956	-0.233693
s-cd47-CD47-1	NCGC00345790-01	Laropiprant	PTGDR	4		86.6		s-cd47-WT_JUR-1	NCGC00345790-01	-2.2	14.818	79.171	-4.8292	4.8292	7.429	0.161292
s-cd47-CD47-1	NCGC00167519-04	Ramatroban	PTGDR2	4	0.0187	101.43	-7.7292	s-cd47-WT_JUR-1	NCGC00167519-04	4		101.938		-7.7292	-0.508	-0.323027
s-cd47-CD47-1	NCGC00345797-01	AP-761	PTGDR2	4	6.619	121.461	-5.1792	s-cd47-WT_JUR-1	NCGC00345797-01	4	0.001	119.277	-8.9792	3.8	2.184	-0.15876
s-cd47-CD47-1	NCGC00344391-02	TM-30089	PTGDR2	4	18.6548	90.548	-4.7292	s-cd47-WT_JUR-1	NCGC00344391-02	-3	33.1734	70.854	-4.4792	-0.25	19.694	0.909707
s-cd47-CD47-1	NCGC00345801-01	AP-768	PTGDR2	4	0.0187	130.711	-7.7292	s-cd47-WT_JUR-1	NCGC00345801-01	4	14.818	99.963	-4.8292	-2.9	30.748	1.58423
s-cd47-CD47-1	NCGC00015529-18	Ibuprofen lysine	PTGS1	4		92.553		s-cd47-WT_JUR-1	NCGC00015529-18	4		106.575		0	-14.022	-1.14766
s-cd47-CD47-1	NCGC00183878-01	Zaltoprofen	PTGS1	4		107.499		s-cd47-WT_JUR-1	NCGC00183878-01	4		108.993		0	-1.494	-0.383193
s-cd47-CD47-1	NCGC00016361-13	Acetaminophen	PTGS1	4	0.0372	110.53	-7.4292	s-cd47-WT_JUR-1	NCGC00016361-13	4		108.512		-7.4292	2.018	-0.168889
s-cd47-CD47-1	NCGC00018248-08	Meloxicam	PTGS1	4		100.506		s-cd47-WT_JUR-1	NCGC00018248-08	4	0.0094	96.304	-8.0292	8.0292	4.202	-0.0356208
s-cd47-CD47-1	NCGC00021336-09	Diclofenac sodium	PTGS1	4		119.674		s-cd47-WT_JUR-1	NCGC00021336-09	4	0.001	113.073	-8.9792	8.9792	6.601	0.110767
s-cd47-CD47-1	NCGC00015823-18	Piroxicam	PTGS1	4		106.754		s-cd47-WT_JUR-1	NCGC00015823-18	1.4	0.0021	80.791	-8.6792	8.6792	25.963	1.29224
s-cd47-CD47-1	NCGC00016868-11	Acemetacin	PTGS1	1.4	0.001	130.505	-8.9792	s-cd47-WT_JUR-1	NCGC00016868-11	4		103.666		-8.9792	26.839	1.3457
s-cd47-CD47-1	NCGC00015724-14	Niflumic acid	PTGS2	-3	37.2212	85.612	-4.4292	s-cd47-WT_JUR-1	NCGC00015724-14	4	0.5899	95.557	-6.2292	1.8	-9.945	-0.898876
s-cd47-CD47-1	NCGC00095118-05	Rofecoxib	PTGS2	4		111.119		s-cd47-WT_JUR-1	NCGC00095118-05	4	0.0132	120.596	-7.8792	7.8792	-9.477	-0.870318
s-cd47-CD47-1	NCGC00091253-07	Asaraldehyde	PTGS2	4		109.198		s-cd47-WT_JUR-1	NCGC00091253-07	4	0.6619	113.446	-6.1792	6.1792	-4.248	-0.551243
s-cd47-CD47-1	NCGC00091455-08	Celecoxib	PTGS2	-3	26.3506	81.802	-4.5792	s-cd47-WT_JUR-1	NCGC00091455-08	-2.4	23.485	83.976	-4.6292	0.05	-2.174	-0.424687
s-cd47-CD47-1	NCGC00022848-06	Hydrocortisone	PTGS2	4		110.426		s-cd47-WT_JUR-1	NCGC00022848-06	4	0.0021	106.957	-8.6792	8.6792	3.469	-0.0803487
s-cd47-CD47-1	NCGC00016759-03	Naproxen sodium	PTGS2	4		100.747		s-cd47-WT_JUR-1	NCGC00016759-03	4		97.187		0	3.56	-0.0747958
s-cd47-CD47-1	NCGC00017352-23	Resveratrol	PTGS2	4	26.3506	101.553	-4.5792	s-cd47-WT_JUR-1	NCGC00017352-23	4	37.2212	95.126	-4.4292	-0.15	6.427	0.10015
s-cd47-CD47-1	NCGC00015399-15	Etodolac	PTGS2	4	37.2212	103.415	-4.4292	s-cd47-WT_JUR-1	NCGC00015399-15	4		93.832		-4.4292	9.583	0.29273
s-cd47-CD47-1	NCGC00015892-07	Rutaecarpine	PTGS2	4	5.2576	93.785	-5.2792	s-cd47-WT_JUR-1	NCGC00015892-07	-2.2	18.6548	80.692	-4.7292	-0.55	13.093	0.506911
s-cd47-CD47-1	NCGC00160163-01	Diosgenin	PTGS2	4		115.053		s-cd47-WT_JUR-1	NCGC00160163-01	4		96.5		0	18.553	0.840082
s-cd47-CD47-1	NCGC00185741-01	Nepafenac	PTGS2	4	1.4818	117.92	-5.8292	s-cd47-WT_JUR-1	NCGC00185741-01	4	0.0047	97.034	-8.3292	2.5	20.886	0.982443
s-cd47-CD47-1	NCGC00015725-16	Nimesulide	PTGS2	-3	33.1734	82.485	-4.4792	s-cd47-WT_JUR-1	NCGC00015725-16	-3	33.1734	17.364	-4.4792	0	65.121	3.68168
s-cd47-CD47-1	NCGC00263133-01	PF-573228	PTK2	-2.2	20.931	29.513	-4.6792	s-cd47-WT_JUR-1	NCGC00263133-01	-3	26.3506	42.176	-4.5792	-0.1	-12.663	-1.06473
s-cd47-CD47-1	NCGC00346931-01	NVP-TAE226	PTK2	-2.1	14.818	22.082	-4.8292	s-cd47-WT_JUR-1	NCGC00346931-01	-2.1	16.6261	21.89	-4.7792	-0.05	0.192	-0.280312
s-cd47-CD47-1	NCGC00242495-01	PF-431396	PTK2	-1.2	5.8992	40.108	-5.2292	s-cd47-WT_JUR-1	NCGC00242495-01	-1.1	8.3328	5.036	-5.0792	-0.15	35.072	1.84808
s-cd47-CD47-1	NCGC00263018-01	NCGC00263018-01	PTK6	-2.1	18.6548	15.903	-4.7292	s-cd47-WT_JUR-1	NCGC00263018-01	-2.1	18.6548	19.89	-4.7292	0	-3.987	-0.535317
s-cd47-CD47-1	NCGC00346803-01	NSC-87877	PTP2C	-2.2	20.931	92.316	-4.6792	s-cd47-WT_JUR-1	NCGC00346803-01	-2.2	16.6261	79.85	-4.7792	0.1	12.466	0.468652
s-cd47-CD47-1	NCGC00346587-01	Bergenin	PTP4A1	4		100.638		s-cd47-WT_JUR-1	NCGC00346587-01	4		102.826		0	-2.188	-0.425541
s-cd47-CD47-1	NCGC00016526-11	Berberine	PTP4A1	-2.2	14.818	45.581	-4.8292	s-cd47-WT_JUR-1	NCGC00016526-11	-2.2	20.931	46.668	-4.6792	-0.15	-1.087	-0.358357
s-cd47-CD47-1	NCGC00263967-03	Alendronate	PTP4A1	4	2.9566	104.348	-5.5292	s-cd47-WT_JUR-1	NCGC00263967-03	4		104.801		-5.5292	-0.453	-0.319671
s-cd47-CD47-1	NCGC00096075-03	Parietin	PTP4A1	4	2.2887	123.156	-5.6404	s-cd47-WT_JUR-1	NCGC00096075-03	4		97.435		-5.6404	25.721	1.27748
s-cd47-CD47-1	NCGC00346646-01	CP-91149	PYGL	-3	23.485	54.586	-4.6292	s-cd47-WT_JUR-1	NCGC00346646-01	-2.2	23.485	33.926	-4.6292	0	20.66	0.968652
s-cd47-CD47-1	NCGC00092318-02	NSC 23766	RAC1	-3	26.3506	86.947	-4.5792	s-cd47-WT_JUR-1	NCGC00092318-02	4		108.446		-4.5792	-21.499	-1.60391
s-cd47-CD47-1	NCGC00188866-01	NA	RAC1	-2.2	20.931	51.146	-4.6792	s-cd47-WT_JUR-1	NCGC00188866-01	-2.2	16.6261	66.7	-4.7792	0.1	-15.554	-1.24114
s-cd47-CD47-1	NCGC00347937-01	AR7	RARA	-2.2	11.7704	44.906	-4.9292	s-cd47-WT_JUR-1	NCGC00347937-01	-2.4	6.619	64.296	-5.1792	0.25	-19.39	-1.47521
s-cd47-CD47-1	NCGC00094358-17	Isotretinoin	RARB	-1.2	2.6351	50.509	-5.5792	s-cd47-WT_JUR-1	NCGC00094358-17	-2.2	6.619	54.528	-5.1792	-0.4	-4.019	-0.537269
s-cd47-CD47-1	NCGC00090752-08	Fenretinide	RARB	-1.1	1.0765	1.05	-5.968	s-cd47-WT_JUR-1	NCGC00090752-08	-1.1	1.7062	2.446	-5.768	-0.2	-1.396	-0.377213
s-cd47-CD47-1	NCGC00167525-03	Tazarotene	RARB	-3	29.5659	37.97	-4.5292	s-cd47-WT_JUR-1	NCGC00167525-03	-3	33.1734	34.354	-4.4792	-0.05	3.616	-0.0713787
s-cd47-CD47-1	NCGC00242477-01	AC-261066	RARB	4	5.2576	103.796	-5.2792	s-cd47-WT_JUR-1	NCGC00242477-01	4		94.66		-5.2792	9.136	0.265454
s-cd47-CD47-1	NCGC00181111-01	Tamibarotene	RARB	-3	23.485	54.541	-4.6292	s-cd47-WT_JUR-1	NCGC00181111-01	-2.2	23.485	37.287	-4.6292	0	17.254	0.760817
s-cd47-CD47-1	NCGC00092284-03	AHPN	RARG	-1.1	0.5258	1.572	-6.2792	s-cd47-WT_JUR-1	NCGC00092284-03	-1.1	0.3317	1.396	-6.4792	0.2	0.176	-0.281289
s-cd47-CD47-1	NCGC00167403-03	Pluripotin	RASAL1	-1.4	0.2635	85.4	-6.5792	s-cd47-WT_JUR-1	NCGC00167403-03	-1.2	0.5899	58.958	-6.2292	-0.35	26.442	1.32147
s-cd47-CD47-1	NCGC00092372-01	Necrostatin-1	RIPK1	4		92.609		s-cd47-WT_JUR-1	NCGC00092372-01	4	2.9566	92.678	-5.5292	5.5292	-0.069	-0.296239
s-cd47-CD47-1	NCGC00346966-01	HMSL10088	RIPK1	-1.2	3.3173	28.528	-5.4792	s-cd47-WT_JUR-1	NCGC00346966-01	-1.2	2.9566	27.338	-5.5292	0.05	1.19	-0.219414
s-cd47-CD47-1	NCGC00346944-01	Y-39983	ROCK1	-2.2	14.818	46.771	-4.8292	s-cd47-WT_JUR-1	NCGC00346944-01	-3	33.1734	65.535	-4.4792	-0.35	-18.764	-1.43701
s-cd47-CD47-1	NCGC00018100-02	Fasudil	ROCK1	4	0.1049	89.72	-6.9792	s-cd47-WT_JUR-1	NCGC00018100-02	4	2.9566	104.627	-5.5292	-1.45	-14.907	-1.20166
s-cd47-CD47-1	NCGC00241982-03	GSK-269962A	ROCK1	-2.2	16.6261	42.86	-4.7792	s-cd47-WT_JUR-1	NCGC00241982-03	-2.2	13.2066	54.819	-4.8792	0.1	-11.959	-1.02177
s-cd47-CD47-1	NCGC00345842-01	GSK-25	ROCK1	-2.1	23.485	23.23	-4.6292	s-cd47-WT_JUR-1	NCGC00345842-01	-3	37.2212	27.461	-4.4292	-0.2	-4.231	-0.550205
s-cd47-CD47-1	NCGC00187983-01	Thiazovivin	ROCK1	-2.1	16.6261	2.192	-4.7792	s-cd47-WT_JUR-1	NCGC00187983-01	-2.1	11.7704	3.019	-4.9292	0.15	-0.827	-0.342492
s-cd47-CD47-1	NCGC00346096-02	GSK429286A	ROCK1	4		111.89		s-cd47-WT_JUR-1	NCGC00346096-02	4		109.345		0	2.545	-0.136732
s-cd47-CD47-1	NCGC00092276-06	Y-27632	ROCK1	4		125.547		s-cd47-WT_JUR-1	NCGC00092276-06	4	0.6619	115.467	-6.1792	6.1792	10.08	0.323057
s-cd47-CD47-1	NCGC00345833-01	SR-3677	ROCK2	4		90.849		s-cd47-WT_JUR-1	NCGC00345833-01	4	16.6261	86.254	-4.7792	4.7792	4.595	-0.0116398
s-cd47-CD47-1	NCGC00346802-01	Glycyl-H-1152	ROCK2	1.2	0.0013	99.473	-8.8792	s-cd47-WT_JUR-1	NCGC00346802-01	4		62.229		-8.8792	37.244	1.98061
s-cd47-CD47-1	NCGC00017280-22	Tretinoin	RORB	-2.2	11.7704	22.434	-4.9292	s-cd47-WT_JUR-1	NCGC00017280-22	-2.1	13.2066	18.502	-4.8792	-0.05	3.932	-0.0520963
s-cd47-CD47-1	NCGC00346893-01	SL-0101-1	RPS6KA1	-2.2	20.931	79.225	-4.6792	s-cd47-WT_JUR-1	NCGC00346893-01	-2.2	20.931	77.558	-4.6792	0	1.667	-0.190307
s-cd47-CD47-1	NCGC00263239-02	FMK-MEA	RPS6KA1	-3	37.2212	75.13	-4.4292	s-cd47-WT_JUR-1	NCGC00263239-02	-2.2	20.931	64.843	-4.6792	0.25	10.287	0.335688
s-cd47-CD47-1	NCGC00263086-01	BI-D1870	RPS6KA1	-2.1	9.3495	19.253	-5.0292	s-cd47-WT_JUR-1	NCGC00263086-01	-2.1	7.4266	6.087	-5.1292	0.1	13.166	0.511366
s-cd47-CD47-1	NCGC00263196-01	S6K-18	RPS6KB1	4		89.22		s-cd47-WT_JUR-1	NCGC00263196-01	4		100.411		0	-11.191	-0.974907
s-cd47-CD47-1	NCGC00263134-01	PF-4708671	RPS6KB1	-2.2	16.6261	55.143	-4.7792	s-cd47-WT_JUR-1	NCGC00263134-01	-2.2	14.818	66.212	-4.8292	0.05	-11.069	-0.967463
s-cd47-CD47-1	NCGC00181304-01	Imexon	RRM1	-1.2	4.6859	74.824	-5.3292	s-cd47-WT_JUR-1	NCGC00181304-01	-2.2	8.3328	69.456	-5.0792	-0.25	5.368	0.035529
s-cd47-CD47-1	NCGC00015520-10	Hydroxyurea	RRM1	-2.2	2.6351	47.712	-5.5792	s-cd47-WT_JUR-1	NCGC00015520-10	-1.1	1.6626	5.365	-5.7792	0.2	42.347	2.292
s-cd47-CD47-1	NCGC00168784-01	Gemcitabine	RRM2	-1.2	0.1865	43.326	-6.7292	s-cd47-WT_JUR-1	NCGC00168784-01	-1.1	0.0526	10.147	-7.2792	0.55	33.179	1.73257
s-cd47-CD47-1	NCGC00181016-03	Bexarotene	RXRA	4		88.998		s-cd47-WT_JUR-1	NCGC00181016-03	4	11.7704	85.082	-4.9292	4.9292	3.916	-0.0530726
s-cd47-CD47-1	NCGC00242489-01	LG100268	RXRA	4	20.931	87.636	-4.6792	s-cd47-WT_JUR-1	NCGC00242489-01	4	23.485	80.109	-4.6292	-0.05	7.527	0.167272
s-cd47-CD47-1	NCGC00250388-01	KRP 203	S1PR1	-2.1	16.6261	2.608	-4.7792	s-cd47-WT_JUR-1	NCGC00250388-01	-2.1	23.485	4.267	-4.6292	-0.15	-1.659	-0.393261
s-cd47-CD47-1	NCGC00347938-01	BAF-312	S1PR1	-3	26.3506	31.162	-4.5792	s-cd47-WT_JUR-1	NCGC00347938-01	-2.1	20.931	10.122	-4.6792	0.1	21.04	0.99184
s-cd47-CD47-1	NCGC00346680-01	MK-8245	SCD	4	0.003	128.396	-8.5292	s-cd47-WT_JUR-1	NCGC00346680-01	4	0.0037	116.24	-8.4292	-0.1	12.156	0.449735
s-cd47-CD47-1	NCGC00250402-01	Dapagliflozin	SCL5A2	-3	29.5659	52.087	-4.5292	s-cd47-WT_JUR-1	NCGC00250402-01	-3	23.485	68.368	-4.6292	0.1	-16.281	-1.2855
s-cd47-CD47-1	NCGC00142423-03	Phlorizin	SCL5A2	4	3.7221	82.224	-5.4292	s-cd47-WT_JUR-1	NCGC00142423-03	4	4.1763	89.192	-5.3792	-0.05	-6.968	-0.717218
s-cd47-CD47-1	NCGC00346691-01	Canagliflozin	SCL5A2	-2.1	23.485	24.357	-4.6292	s-cd47-WT_JUR-1	NCGC00346691-01	-2.1	20.931	25.573	-4.6792	0.05	-1.216	-0.366229
s-cd47-CD47-1	NCGC00346700-01	A-803467	SCN10A	-2.1	20.931	16.138	-4.6792	s-cd47-WT_JUR-1	NCGC00346700-01	-3	33.1734	29.771	-4.4792	-0.2	-13.633	-1.12392
s-cd47-CD47-1	NCGC00346885-01	Sipatrigine	SCN2A	4	10.4904	87.947	-4.9792	s-cd47-WT_JUR-1	NCGC00346885-01	1.4	0.0013	105.954	-8.8792	3.9	-18.007	-1.39082
s-cd47-CD47-1	NCGC00015443-06	Flecainide	SCN5A	-3	37.2212	28.152	-4.4292	s-cd47-WT_JUR-1	NCGC00015443-06	-2.1	20.931	20.878	-4.6792	0.25	7.274	0.151834
s-cd47-CD47-1	NCGC00015897-06	Ranolazine	SCN9A	4	11.7704	113.776	-4.9292	s-cd47-WT_JUR-1	NCGC00015897-06	4		104.464		-4.9292	9.312	0.276193
s-cd47-CD47-1	NCGC00015147-09	Benzamil	SCNN1D	-2.1	20.931	13.727	-4.6792	s-cd47-WT_JUR-1	NCGC00015147-09	-3	33.1734	20.645	-4.4792	-0.2	-6.918	-0.714167
s-cd47-CD47-1	NCGC00015089-08	Amiloride hydrochloride	SCNN1D	4	3.7221	122.296	-5.4292	s-cd47-WT_JUR-1	NCGC00015089-08	4	0.0105	106.701	-7.9792	2.55	15.595	0.659584
s-cd47-CD47-1	NCGC00016569-08	Tranexamic acid	SERPINE1	4	1.6626	110.298	-5.7792	s-cd47-WT_JUR-1	NCGC00016569-08	4	1.049	122.575	-5.9792	0.2	-12.277	-1.04118
s-cd47-CD47-1	NCGC00015092-09	Aminocaproic acid	SERPINE1	4	9.3495	121.687	-5.0292	s-cd47-WT_JUR-1	NCGC00015092-09	4	0.2957	121.113	-6.5292	1.5	0.574	-0.257003
s-cd47-CD47-1	NCGC00263142-01	Tiplasinin	SERPINE1	-3	37.2212	71.519	-4.4292	s-cd47-WT_JUR-1	NCGC00263142-01	-2.2	20.931	69.186	-4.6792	0.25	2.333	-0.149668
s-cd47-CD47-1	NCGC00250410-01	GSK-650394	SGK1	4	0.2635	101.426	-6.5792	s-cd47-WT_JUR-1	NCGC00250410-01	4		97.407		-6.5792	4.019	-0.0467875
s-cd47-CD47-1	NCGC00013822-03	NSC-75503	SHH	4	20.931	101.753	-4.6792	s-cd47-WT_JUR-1	NCGC00013822-03	4	0.4176	104.583	-6.3792	1.7	-2.83	-0.464716
s-cd47-CD47-1	NCGC00347954-01	SAG	SHH	-2.1	20.931	-1.316	-4.6792	s-cd47-WT_JUR-1	NCGC00347954-01	-2.1	18.6548	0.299	-4.7292	0.05	-1.615	-0.390576
s-cd47-CD47-1	NCGC00345084-01	Robotnikinin	SHH	4		111.108		s-cd47-WT_JUR-1	NCGC00345084-01	4	0.1049	107.47	-6.9792	6.9792	3.638	-0.0700362
s-cd47-CD47-1	NCGC00014352-03	GANT61	SHH	-2.2	16.6261	67.464	-4.7792	s-cd47-WT_JUR-1	NCGC00014352-03	-3	33.1734	61.241	-4.4792	-0.3	6.223	0.0877014
s-cd47-CD47-1	NCGC00242497-02	Vismodegib	SHH	4	37.2212	77.697	-4.4292	s-cd47-WT_JUR-1	NCGC00242497-02	-3	33.1734	71.412	-4.4792	0.05	6.285	0.0914846
s-cd47-CD47-1	NCGC00024901-03	BD-1047	SIGMAR1	4	0.2957	87.088	-6.5292	s-cd47-WT_JUR-1	NCGC00024901-03	4		105.954		-6.5292	-18.866	-1.44324
s-cd47-CD47-1	NCGC00263126-01	Cutamesine hydrochloride	SIGMAR1	4	37.2212	81.145	-4.4292	s-cd47-WT_JUR-1	NCGC00263126-01	4	0.0935	94.461	-7.0292	2.6	-13.316	-1.10458
s-cd47-CD47-1	NCGC00165875-03	PB-28	SIGMAR1	-2.2	13.2066	51.749	-4.8792	s-cd47-WT_JUR-1	NCGC00165875-03	-3	23.485	50.855	-4.6292	-0.25	0.894	-0.237476
s-cd47-CD47-1	NCGC00182052-03	SRT1720	SIRT1	-2.1	11.7704	-1.956	-4.9292	s-cd47-WT_JUR-1	NCGC00182052-03	-1.1	7.4266	-0.339	-5.1292	0.2	-1.617	-0.390698
s-cd47-CD47-1	NCGC00242458-01	EX-527	SIRT1	4	20.931	79.348	-4.6792	s-cd47-WT_JUR-1	NCGC00242458-01	-3	33.1734	79.549	-4.4792	-0.2	-0.201	-0.304293
s-cd47-CD47-1	NCGC00090504-10	Isoliquiritigenin	SIRT1	-2.1	18.6548	21.636	-4.7292	s-cd47-WT_JUR-1	NCGC00090504-10	-2.1	20.931	12.904	-4.6792	-0.05	8.732	0.240801
s-cd47-CD47-1	NCGC00017344-06	Fisetin	SIRT1	-2.2	14.818	30.105	-4.8292	s-cd47-WT_JUR-1	NCGC00017344-06	-2.1	18.6548	14.641	-4.7292	-0.1	15.464	0.651591
s-cd47-CD47-1	NCGC00347936-01	Ak-7	SIRT2	-2.2	23.485	32.64	-4.6292	s-cd47-WT_JUR-1	NCGC00347936-01	-2.2	18.6548	45.4	-4.7292	0.1	-12.76	-1.07065
s-cd47-CD47-1	NCGC00250392-01	AR-C155858	SLC16A1	4	0.0017	89.882	-8.7792	s-cd47-WT_JUR-1	NCGC00250392-01	-1.2	0.0332	70.286	-7.4792	-1.3	19.596	0.903727
s-cd47-CD47-1	NCGC00160421-02	Tetrabenazine	SLC18A2	4	2.9566	113.562	-5.5292	s-cd47-WT_JUR-1	NCGC00160421-02	4	11.7704	119.501	-4.9292	-0.6	-5.939	-0.654428
s-cd47-CD47-1	NCGC00015977-02	SK&F-89976A	SLC6A1	4		107.125		s-cd47-WT_JUR-1	NCGC00015977-02	4	11.7704	100.775	-4.9292	4.9292	6.35	0.095451
s-cd47-CD47-1	NCGC00015122-09	Bupropion hydrochloride	SLC6A3	4	0.0037	100.226	-8.4292	s-cd47-WT_JUR-1	NCGC00015122-09	4	8.3328	102.976	-5.0792	-3.35	-2.75	-0.459834
s-cd47-CD47-1	NCGC00346439-01	Diclofensine	SLC6A3	-3	26.3506	42.029	-4.5792	s-cd47-WT_JUR-1	NCGC00346439-01	-3	29.5659	32.866	-4.5292	-0.05	9.163	0.267101
s-cd47-CD47-1	NCGC00164559-04	Duloxetine hydrochloride	SLC6A4	-1.1	4.1763	0.759	-5.3792	s-cd47-WT_JUR-1	NCGC00164559-04	-1.1	8.3328	1.942	-5.0792	-0.3	-1.183	-0.364215
s-cd47-CD47-1	NCGC00253658-02	Dapoxetine hydrochloride	SLC6A4	-2.4	33.1734	50.243	-4.4792	s-cd47-WT_JUR-1	NCGC00253658-02	-3	37.2212	49.393	-4.4292	-0.05	0.85	-0.240161
s-cd47-CD47-1	NCGC00015264-08	Clomipramine hydrochloride	SLC6A4	-1.1	0.4176	5.153	-6.3792	s-cd47-WT_JUR-1	NCGC00015264-08	-1.1	0.4686	3.729	-6.3292	-0.05	1.424	-0.205135
s-cd47-CD47-1	NCGC00247954-02	SSR-504734	SLC6A9	-2.2	14.818	54.982	-4.8292	s-cd47-WT_JUR-1	NCGC00247954-02	-2.2	20.931	65.231	-4.6792	-0.15	-10.249	-0.917426
s-cd47-CD47-1	NCGC00263114-01	SCH-900435	SLC6A9	-1.1	0.935	37.464	-6.0292	s-cd47-WT_JUR-1	NCGC00263114-01	-1.1	0.7427	19.07	-6.1292	0.1	18.394	0.83038
s-cd47-CD47-1	NCGC00263170-01	LY-2940680??	SMO	-3	20.931	60.895	-4.6792	s-cd47-WT_JUR-1	NCGC00263170-01	4	10.4904	80.117	-4.9792	0.3	-19.222	-1.46496
s-cd47-CD47-1	NCGC00263210-01	SANT-2	SMO	-2.2	14.818	49.716	-4.8292	s-cd47-WT_JUR-1	NCGC00263210-01	-2.4	13.2066	64.227	-4.8792	0.05	-14.511	-1.17749
s-cd47-CD47-1	NCGC00346696-01	PF-5274857	SMO	4	0.001	94.548	-8.9792	s-cd47-WT_JUR-1	NCGC00346696-01	4		102.248		-8.9792	-7.7	-0.761885
s-cd47-CD47-1	NCGC00263084-02	Hh-Ag1.5	SMO	-2.1	23.485	-1.622	-4.6292	s-cd47-WT_JUR-1	NCGC00263084-02	-2.1	18.6548	-0.663	-4.7292	0.1	-0.959	-0.350547
s-cd47-CD47-1	NCGC00250382-01	NVP-LDE-225	SMO	-2.2	18.6548	63.796	-4.7292	s-cd47-WT_JUR-1	NCGC00250382-01	-1.2	3.7221	63.899	-5.4292	0.7	-0.103	-0.298313
s-cd47-CD47-1	NCGC00163474-05	Cyclopamine	SMO	4	10.4904	103.81	-4.9792	s-cd47-WT_JUR-1	NCGC00163474-05	-2.4	16.6261	90.864	-4.7792	-0.2	12.946	0.497941
s-cd47-CD47-1	NCGC00346826-01	HPI-1	SMO	-2.2	18.6548	60.299	-4.7292	s-cd47-WT_JUR-1	NCGC00346826-01	-2.2	23.485	26.899	-4.6292	-0.1	33.4	1.74605
s-cd47-CD47-1	NCGC00188399-03	Fingolimod hydrochloride	SPHK1	-2.1	14.818	0.71	-4.8292	s-cd47-WT_JUR-1	NCGC00188399-03	-2.1	10.4904	1.854	-4.9792	0.15	-1.144	-0.361836
s-cd47-CD47-1	NCGC00346972-01	PF-543	SPHK1	4		78.617		s-cd47-WT_JUR-1	NCGC00346972-01	-1.4	0.8333	73.83	-6.0792	6.0792	4.787	7.61478e-05
s-cd47-CD47-1	NCGC00346822-01	Idronoxil	SPHK1	-1.1	1.8655	20.704	-5.7292	s-cd47-WT_JUR-1	NCGC00346822-01	-1.1	1.6626	7.704	-5.7792	0.05	13	0.501236
s-cd47-CD47-1	NCGC00346441-01	ABC-294640	SPHK2	-2.1	18.6548	32.778	-4.7292	s-cd47-WT_JUR-1	NCGC00346441-01	-3	37.2212	8.808	-4.4292	-0.3	23.97	1.17063
s-cd47-CD47-1	NCGC00241099-01	Saracatinib	SRC	-2.1	18.6548	4.293	-4.7292	s-cd47-WT_JUR-1	NCGC00241099-01	-2.1	20.931	5.374	-4.6792	-0.05	-1.081	-0.357991
s-cd47-CD47-1	NCGC00242490-02	PD-166285	SRC	-2.1	4.6859	0.299	-5.3292	s-cd47-WT_JUR-1	NCGC00242490-02	-1.1	0.5899	1.13	-6.2292	0.9	-0.831	-0.342736
s-cd47-CD47-1	NCGC00346644-01	KX-01	SRC	-1.1	0.0296	21.303	-7.5292	s-cd47-WT_JUR-1	NCGC00346644-01	-1.1	0.0166	4.817	-7.7792	0.25	16.486	0.713953
s-cd47-CD47-1	NCGC00345830-01	PD-173955 Analogue 1	SRC	-1.2	0.0743	70.699	-7.1292	s-cd47-WT_JUR-1	NCGC00345830-01	-1.4	0.1177	51.304	-6.9292	-0.2	19.395	0.891462
s-cd47-CD47-1	NCGC00345829-01	PD-173955	SRC	-1.1	0.1865	35.348	-6.7292	s-cd47-WT_JUR-1	NCGC00345829-01	-1.1	0.0935	8.871	-7.0292	0.3	26.477	1.32361
s-cd47-CD47-1	NCGC00263522-02	Dutasteride	SRD5A1	-2.2	10.4904	55.015	-4.9792	s-cd47-WT_JUR-1	NCGC00263522-02	-2.2	10.4904	53.393	-4.9792	0	1.622	-0.193053
s-cd47-CD47-1	NCGC00181796-01	Octreotide	SSTR1	4		94.993		s-cd47-WT_JUR-1	NCGC00181796-01	4	0.0033	100.04	-8.4792	8.4792	-5.047	-0.599998
s-cd47-CD47-1	NCGC00250393-01	CAP-232	SSTR4	-2.2	20.931	24.635	-4.6792	s-cd47-WT_JUR-1	NCGC00250393-01	-2.2	14.818	55.666	-4.8292	0.15	-31.031	-2.18555
s-cd47-CD47-1	NCGC00262642-02	WP-1066	STAT3	-1.1	8.3328	2.548	-5.0792	s-cd47-WT_JUR-1	NCGC00262642-02	-1.1	4.6859	5.114	-5.3292	0.25	-2.566	-0.448607
s-cd47-CD47-1	NCGC00345808-01	BP-1-102	STAT3	-2.1	14.818	0.523	-4.8292	s-cd47-WT_JUR-1	NCGC00345808-01	-2.1	18.6548	2.087	-4.7292	-0.1	-1.564	-0.387464
s-cd47-CD47-1	NCGC00017223-03	Ursolic acid	STAT3	-2.1	17.0619	1.657	-4.768	s-cd47-WT_JUR-1	NCGC00017223-03	-2.1	42.8575	3.084	-4.368	-0.4	-1.427	-0.379104
s-cd47-CD47-1	NCGC00345811-01	LLL-12	STAT3	-1.1	0.3317	2.784	-6.4792	s-cd47-WT_JUR-1	NCGC00345811-01	-1.1	0.3317	4.094	-6.4792	0	-1.31	-0.371965
s-cd47-CD47-1	NCGC00015735-12	Niclosamide	STAT3	-1.1	1.177	3.373	-5.9292	s-cd47-WT_JUR-1	NCGC00015735-12	-1.1	0.8333	4.043	-6.0792	0.15	-0.67	-0.332912
s-cd47-CD47-1	NCGC00262829-02	C-188-9	STAT3	-1.1	8.3328	1.4	-5.0792	s-cd47-WT_JUR-1	NCGC00262829-02	-1.1	5.8992	1.863	-5.2292	0.15	-0.463	-0.320281
s-cd47-CD47-1	NCGC00262641-02	S31-201	STAT3	4	18.6548	78.465	-4.7292	s-cd47-WT_JUR-1	NCGC00262641-02	4	23.485	77.069	-4.6292	-0.1	1.396	-0.206844
s-cd47-CD47-1	NCGC00345805-01	STX-0119	STAT3	-2.2	14.818	39.881	-4.8292	s-cd47-WT_JUR-1	NCGC00345805-01	-2.1	8.3328	18.893	-5.0792	0.25	20.988	0.988667
s-cd47-CD47-1	NCGC00163650-02	Cryptotanshinone	STAT3	-2.2	16.6261	31.687	-4.7792	s-cd47-WT_JUR-1	NCGC00163650-02	-2.1	26.3506	5.548	-4.5792	-0.2	26.139	1.30298
s-cd47-CD47-1	NCGC00346945-01	BAY61-3606	SYK	-2.1	4.6859	27.941	-5.3292	s-cd47-WT_JUR-1	NCGC00346945-01	-1.2	3.3173	41.136	-5.4792	0.15	-13.195	-1.09719
s-cd47-CD47-1	NCGC00253909-01	PRT-060318	SYK	-2.1	23.485	0.801	-4.6292	s-cd47-WT_JUR-1	NCGC00253909-01	-2.1	26.3506	1.253	-4.5792	-0.05	-0.452	-0.31961
s-cd47-CD47-1	NCGC00182051-02	R406	SYK	-2.1	13.2066	33.994	-4.8792	s-cd47-WT_JUR-1	NCGC00182051-02	-2.1	16.6261	31.546	-4.7792	-0.1	2.448	-0.14265
s-cd47-CD47-1	NCGC00094226-11	Piceatannol	SYK	-2.2	14.818	29.008	-4.8292	s-cd47-WT_JUR-1	NCGC00094226-11	-2.1	14.818	26.14	-4.8292	0	2.868	-0.117022
s-cd47-CD47-1	NCGC00346622-01	Fostamatinib disodium	SYK	-2.2	13.2066	26.215	-4.8792	s-cd47-WT_JUR-1	NCGC00346622-01	-2.1	14.818	18.123	-4.8292	-0.05	8.092	0.201748
s-cd47-CD47-1	NCGC00181785-01	Aprepitant	TACR1	-2.1	20.931	7.283	-4.6792	s-cd47-WT_JUR-1	NCGC00181785-01	-2.1	16.6261	3.406	-4.7792	0.1	3.877	-0.0554524
s-cd47-CD47-1	NCGC00025092-02	GR-159897	TACR2	4		102.941		s-cd47-WT_JUR-1	NCGC00025092-02	4		98.418		0	4.523	-0.0160332
s-cd47-CD47-1	NCGC00263110-01	Osanetant	TACR3	-2.1	18.6548	2.925	-4.7292	s-cd47-WT_JUR-1	NCGC00263110-01	-2.1	20.931	4.307	-4.6792	-0.05	-1.382	-0.376358
s-cd47-CD47-1	NCGC00025195-01	Ozagrel hydrochloride	TBXA2R	-3	37.2212	83.993	-4.4292	s-cd47-WT_JUR-1	NCGC00025195-01	4	20.931	100.792	-4.6792	0.25	-16.799	-1.31711
s-cd47-CD47-1	NCGC00346741-01	Travoprost	TBXA2R	-2.1	18.6548	20.949	-4.7292	s-cd47-WT_JUR-1	NCGC00346741-01	-2.1	14.818	28.468	-4.8292	0.1	-7.519	-0.75084
s-cd47-CD47-1	NCGC00025325-03	Vapiprost hydrochloride	TBXA2R	4	0.0037	122.164	-8.4292	s-cd47-WT_JUR-1	NCGC00025325-03	4		110.674		-8.4292	11.49	0.409096
s-cd47-CD47-1	NCGC00181296-01	Seratrodast	TBXA2R	-2.4	18.6548	41.476	-4.7292	s-cd47-WT_JUR-1	NCGC00181296-01	-2.4	18.6548	22.526	-4.7292	0	18.95	0.864308
s-cd47-CD47-1	NCGC00346554-01	Tie-2 kinase inhibitor	TEK	-3	29.5659	29.605	-4.5292	s-cd47-WT_JUR-1	NCGC00346554-01	-3	33.1734	41.226	-4.4792	-0.05	-11.621	-1.00115
s-cd47-CD47-1	NCGC00263199-02	AMG-Tie2-1	TEK	-2.1	23.485	27.135	-4.6292	s-cd47-WT_JUR-1	NCGC00263199-02	-2.1	20.931	26.369	-4.6792	0.05	0.766	-0.245287
s-cd47-CD47-1	NCGC00167535-01	Tenofovir	TERT	4		101.32		s-cd47-WT_JUR-1	NCGC00167535-01	1.4	0.0019	117.928	-8.7292	8.7292	-16.608	-1.30545
s-cd47-CD47-1	NCGC00346561-01	Emtricitabine	TERT	4		89.348		s-cd47-WT_JUR-1	NCGC00346561-01	4	0.2093	105.661	-6.6792	6.6792	-16.313	-1.28745
s-cd47-CD47-1	NCGC00090691-03	Didanosine	TERT	4	0.0132	101.035	-7.8792	s-cd47-WT_JUR-1	NCGC00090691-03	4		114.487		-7.8792	-13.452	-1.11287
s-cd47-CD47-1	NCGC00253767-01	Clevudine	TERT	4	0.0053	108.64	-8.2792	s-cd47-WT_JUR-1	NCGC00253767-01	4	0.8333	119.73	-6.0792	-2.2	-11.09	-0.968744
s-cd47-CD47-1	NCGC00159341-03	Lamivudine	TERT	4		91.917		s-cd47-WT_JUR-1	NCGC00159341-03	4		101.973		0	-10.056	-0.905649
s-cd47-CD47-1	NCGC00023212-07	Stavudine	TERT	-2.2	34.0429	56.077	-4.468	s-cd47-WT_JUR-1	NCGC00023212-07	-3	67.9245	65.028	-4.168	-0.3	-8.951	-0.838222
s-cd47-CD47-1	NCGC00090705-11	Zalcitabine	TERT	4	0.0012	81.964	-8.9292	s-cd47-WT_JUR-1	NCGC00090705-11	4	2.6351	89.619	-5.5792	-3.35	-7.655	-0.759139
s-cd47-CD47-1	NCGC00065890-07	Nevirapine	TERT	4		103.973		s-cd47-WT_JUR-1	NCGC00065890-07	4		108.198		0	-4.225	-0.549839
s-cd47-CD47-1	NCGC00093656-03	Brivudine	TERT	4		95.077		s-cd47-WT_JUR-1	NCGC00093656-03	-1.4	0.5899	98.821	-6.2292	6.2292	-3.744	-0.520489
s-cd47-CD47-1	NCGC00023945-13	Zidovudine	TERT	4		93.089		s-cd47-WT_JUR-1	NCGC00023945-13	4	4.1763	96.584	-5.3792	5.3792	-3.495	-0.505294
s-cd47-CD47-1	NCGC00183876-01	Tenofovir Disoproxil Fumarate	TERT	4		112.281		s-cd47-WT_JUR-1	NCGC00183876-01	4		109.362		0	2.919	-0.11391
s-cd47-CD47-1	NCGC00159337-06	Efavirenz	TERT	-2.1	26.3506	9.209	-4.5792	s-cd47-WT_JUR-1	NCGC00159337-06	-2.1	18.6548	6.063	-4.7292	0.15	3.146	-0.100058
s-cd47-CD47-1	NCGC00167740-01	Costunolide	TERT	-3	29.5659	6.651	-4.5292	s-cd47-WT_JUR-1	NCGC00167740-01	-2.1	18.6548	3.482	-4.7292	0.2	3.169	-0.0986548
s-cd47-CD47-1	NCGC00096095-02	8-Cl-Ado	TERT	4	33.1734	89.943	-4.4792	s-cd47-WT_JUR-1	NCGC00096095-02	-2.2	18.6548	69.837	-4.7292	0.25	20.106	0.934847
s-cd47-CD47-1	NCGC00242492-02	BIBR 1532	TERT	-2.2	16.6261	45.071	-4.7792	s-cd47-WT_JUR-1	NCGC00242492-02	-3	26.3506	23.105	-4.5792	-0.2	21.966	1.04834
s-cd47-CD47-1	NCGC00165898-02	SD-208	TGBR1	-2.4	20.931	69.935	-4.6792	s-cd47-WT_JUR-1	NCGC00165898-02	4	2.6351	96.156	-5.5792	0.9	-26.221	-1.89204
s-cd47-CD47-1	NCGC00346679-01	GW-788388	TGBR1	4	18.6548	93.167	-4.7292	s-cd47-WT_JUR-1	NCGC00346679-01	4		111.523		-4.7292	-18.356	-1.41212
s-cd47-CD47-1	NCGC00242054-03	SJN 2511	TGBR1	4		107.131		s-cd47-WT_JUR-1	NCGC00242054-03	4	0.003	122.59	-8.5292	8.5292	-15.459	-1.23534
s-cd47-CD47-1	NCGC00025230-01	SB-431542	TGBR1	-3	37.2212	90.589	-4.4292	s-cd47-WT_JUR-1	NCGC00025230-01	4	9.3495	102.817	-5.0292	0.6	-12.228	-1.03819
s-cd47-CD47-1	NCGC00249388-01	LY2157299	TGBR1	4		101.703		s-cd47-WT_JUR-1	NCGC00249388-01	4		111.244		0	-9.541	-0.874224
s-cd47-CD47-1	NCGC00165869-03	Dorsomorphin	TGBR1	-2.1	14.818	-1.008	-4.8292	s-cd47-WT_JUR-1	NCGC00165869-03	-2.1	18.6548	0.855	-4.7292	-0.1	-1.863	-0.405709
s-cd47-CD47-1	NCGC00165889-02	SB-505124	TGBR1	-2.2	18.6548	54.906	-4.7292	s-cd47-WT_JUR-1	NCGC00165889-02	-2.2	14.818	52.992	-4.8292	0.1	1.914	-0.175235
s-cd47-CD47-1	NCGC00347947-01	ITD-1	TGBR1	-2.1	18.6548	44.011	-4.7292	s-cd47-WT_JUR-1	NCGC00347947-01	-2.1	26.3506	31.446	-4.5792	-0.15	12.565	0.474693
s-cd47-CD47-1	NCGC00186024-02	SB-525334	TGBR1	-3	33.1734	95.334	-4.4792	s-cd47-WT_JUR-1	NCGC00186024-02	-3	33.1734	79.957	-4.4792	0	15.377	0.646282
s-cd47-CD47-1	NCGC00242598-03	LY2109761	TGBR1	-2.4	23.485	83.869	-4.6292	s-cd47-WT_JUR-1	NCGC00242598-03	-3	23.485	66.558	-4.6292	0	17.311	0.764295
s-cd47-CD47-1	NCGC00165721-02	A 83-01	TGBR1	4	10.4904	109.621	-4.9792	s-cd47-WT_JUR-1	NCGC00165721-02	-2.4	20.931	89.741	-4.6792	-0.3	19.88	0.921056
s-cd47-CD47-1	NCGC00263015-01	NCGC00263015-01	TLR4	-3	26.3506	38.956	-4.5792	s-cd47-WT_JUR-1	NCGC00263015-01	-2.1	23.485	39.554	-4.6292	0.05	-0.598	-0.328518
s-cd47-CD47-1	NCGC00263017-01	CPG-52364	TLR7	-2.1	1.4818	4.123	-5.8292	s-cd47-WT_JUR-1	NCGC00263017-01	-2.1	1.049	1.409	-5.9792	0.15	2.714	-0.126419
s-cd47-CD47-1	NCGC00070736-04	Imiquimod	TLR7	-2.2	18.6548	72.849	-4.7292	s-cd47-WT_JUR-1	NCGC00070736-04	-3	23.485	50.894	-4.6292	-0.1	21.955	1.04767
s-cd47-CD47-1	NCGC00346551-01	Pomalidomide	TNF	-3	37.2212	88.227	-4.4292	s-cd47-WT_JUR-1	NCGC00346551-01	4		133.486		-4.4292	-45.259	-3.05375
s-cd47-CD47-1	NCGC00095709-06	Tanshinone IIA	TNF	-2.2	13.2066	50.052	-4.8792	s-cd47-WT_JUR-1	NCGC00095709-06	-2.1	16.6261	65.863	-4.7792	-0.1	-15.811	-1.25682
s-cd47-CD47-1	NCGC00167491-02	Lenalidomide	TNF	4	6.0538	121.383	-5.218	s-cd47-WT_JUR-1	NCGC00167491-02	4	21.4796	129.952	-4.668	-0.55	-8.569	-0.814912
s-cd47-CD47-1	NCGC00015989-16	Thalidomide	TNF	4	0.2348	120.668	-6.6292	s-cd47-WT_JUR-1	NCGC00015989-16	4		128.491		-6.6292	-7.823	-0.769391
s-cd47-CD47-1	NCGC00263092-01	Apratastat	TNF	4	13.2066	100.207	-4.8792	s-cd47-WT_JUR-1	NCGC00263092-01	-2.4	20.931	97.038	-4.6792	-0.2	3.169	-0.0986548
s-cd47-CD47-1	NCGC00095597-02	Andrographolide	TNF	4	2.148	142.756	-5.668	s-cd47-WT_JUR-1	NCGC00095597-02	4		139.416		-5.668	3.34	-0.0882203
s-cd47-CD47-1	NCGC00018185-07	Tranilast	TNF	-2.2	16.6261	90.273	-4.7792	s-cd47-WT_JUR-1	NCGC00018185-07	-2.4	23.485	85.417	-4.6292	-0.15	4.856	0.00428655
s-cd47-CD47-1	NCGC00247624-02	Tanshinone I	TNF	-2.1	16.6261	62.314	-4.7792	s-cd47-WT_JUR-1	NCGC00247624-02	-2.1	20.931	23.03	-4.6792	-0.1	39.284	2.1051
s-cd47-CD47-1	NCGC00347279-01	AIM-100	TNK2	-2.1	16.6261	24.355	-4.7792	s-cd47-WT_JUR-1	NCGC00347279-01	-2.3	4.1763	6.824	-5.3792	0.6	17.531	0.77772
s-cd47-CD47-1	NCGC00250397-01	NVP-XAV-939	TNKS	4	18.6548	96.447	-4.7292	s-cd47-WT_JUR-1	NCGC00250397-01	-3	26.3506	87.094	-4.5792	-0.15	9.353	0.278695
s-cd47-CD47-1	NCGC00015598-03	beta-Lapachone	TOP1	-2.1	16.6261	-0.012	-4.7792	s-cd47-WT_JUR-1	NCGC00015598-03	-2.1	20.931	1.158	-4.6792	-0.1	-1.17	-0.363422
s-cd47-CD47-1	NCGC00167831-01	SN-38	TOP1	-1.1	0.2957	24.473	-6.5292	s-cd47-WT_JUR-1	NCGC00167831-01	-1.1	0.0037	6.912	-8.4292	1.9	17.561	0.77955
s-cd47-CD47-1	NCGC00014925-07	Topotecan hydrochloride	TOP1	-1.1	2.0931	30.703	-5.6792	s-cd47-WT_JUR-1	NCGC00014925-07	-1.1	0.0418	8.516	-7.3792	1.7	22.187	1.06183
s-cd47-CD47-1	NCGC00095986-02	10-hydroxycamptothecin	TOP1	-1.1	0.3317	33.266	-6.4792	s-cd47-WT_JUR-1	NCGC00095986-02	-1.1	0.0209	9.333	-7.6792	1.2	23.933	1.16837
s-cd47-CD47-1	NCGC00178697-05	Irinotecan	TOP1	-1.1	1.8655	40.251	-5.7292	s-cd47-WT_JUR-1	NCGC00178697-05	-1.1	0.3317	15.402	-6.4792	0.75	24.849	1.22427
s-cd47-CD47-1	NCGC00016994-16	Camptothecin	TOP1	-1.1	0.1865	37.178	-6.7292	s-cd47-WT_JUR-1	NCGC00016994-16	-1.1	0.0094	9.64	-8.0292	1.3	27.538	1.38835
s-cd47-CD47-1	NCGC00346471-01	Rebeccamycin	TOP1	-1.1	0.7427	41.489	-6.1292	s-cd47-WT_JUR-1	NCGC00346471-01	-1.1	0.1482	12.004	-6.8292	0.7	29.485	1.50716
s-cd47-CD47-1	NCGC00167429-05	Temozolomide	TOP2A	4	0.0935	119.744	-7.0292	s-cd47-WT_JUR-1	NCGC00167429-05	4		128.76		-7.0292	-9.016	-0.842188
s-cd47-CD47-1	NCGC00346890-01	Banoxantrone	TOP2A	-2.4	11.7704	96.072	-4.9292	s-cd47-WT_JUR-1	NCGC00346890-01	-2.4	8.3328	104.404	-5.0792	0.15	-8.332	-0.80045
s-cd47-CD47-1	NCGC00093976-06	Idarubicin hydrochloride	TOP2A	-1.1	0.6619	1.392	-6.1792	s-cd47-WT_JUR-1	NCGC00093976-06	-1.1	0.1482	1.935	-6.8292	0.65	-0.543	-0.325162
s-cd47-CD47-1	NCGC00015479-20	Genistein	TOP2A	-2.4	23.485	84.857	-4.6292	s-cd47-WT_JUR-1	NCGC00015479-20	-3	26.3506	85.118	-4.5792	-0.05	-0.261	-0.307955
s-cd47-CD47-1	NCGC00346513-01	Amonafide	TOP2A	-2.1	18.6548	16.299	-4.7292	s-cd47-WT_JUR-1	NCGC00346513-01	-2.1	16.6261	7.274	-4.7792	0.05	9.025	0.25868
s-cd47-CD47-1	NCGC00346949-01	ICRF-193	TOP2A	4		112.382		s-cd47-WT_JUR-1	NCGC00346949-01	-1.4	0.0235	102.322	-7.6292	7.6292	10.06	0.321837
s-cd47-CD47-1	NCGC00346563-01	Teniposide	TOP2A	-1.1	4.1763	20.516	-5.3792	s-cd47-WT_JUR-1	NCGC00346563-01	-1.1	0.1663	7.361	-6.7792	1.4	13.155	0.510695
s-cd47-CD47-1	NCGC00167503-02	Aclarubicin	TOP2A	-1.1	0.5899	31.46	-6.2292	s-cd47-WT_JUR-1	NCGC00167503-02	-1.1	0.935	14.89	-6.0292	-0.2	16.57	0.719079
s-cd47-CD47-1	NCGC00015693-08	Mitoxantrone	TOP2A	-1.1	1.8655	20.792	-5.7292	s-cd47-WT_JUR-1	NCGC00015693-08	-1.1	0.1663	1.862	-6.7792	1.05	18.93	0.863087
s-cd47-CD47-1	NCGC00346437-01	Vosaroxin	TOP2A	-2.1	12.8702	23.663	-4.8904	s-cd47-WT_JUR-1	NCGC00346437-01	-1.1	1.1471	3.947	-5.9404	1.05	19.716	0.911049
s-cd47-CD47-1	NCGC00167982-02	Pirarubicin	TOP2A	-2.1	13.2066	26.932	-4.8792	s-cd47-WT_JUR-1	NCGC00167982-02	-1.1	1.4818	4.326	-5.8292	0.95	22.606	1.0874
s-cd47-CD47-1	NCGC00263544-02	Dexrazoxane hydrochloride	TOP2A	4	23.485	114.137	-4.6292	s-cd47-WT_JUR-1	NCGC00263544-02	-3	26.3506	70.455	-4.5792	-0.05	43.682	2.37346
s-cd47-CD47-1	NCGC00263918-04	Epirubicin hydrochloride	TOP2A	-1.1	1.049	49.805	-5.9792	s-cd47-WT_JUR-1	NCGC00263918-04	-1.1	0.2635	4.322	-6.5792	0.6	45.483	2.48336
s-cd47-CD47-1	NCGC00024415-39	Doxorubicin	TOP2A	-1.1	0.4176	61.232	-6.3792	s-cd47-WT_JUR-1	NCGC00024415-39	-1.1	0.1663	5.625	-6.7792	0.4	55.607	3.10113
s-cd47-CD47-1	NCGC00179504-06	Etoposide	TOP2A	-3	37.2212	69.938	-4.4292	s-cd47-WT_JUR-1	NCGC00179504-06	-1.1	1.177	10.441	-5.9292	1.5	59.497	3.3385
s-cd47-CD47-1	NCGC00178529-03	Levofloxacin	TOP2B	4	0.0264	136.113	-7.5792	s-cd47-WT_JUR-1	NCGC00178529-03	4		143.073		-7.5792	-6.96	-0.71673
s-cd47-CD47-1	NCGC00016959-07	Ciprofloxacin	TOP2B	1.4	0.2957	137.222	-6.5292	s-cd47-WT_JUR-1	NCGC00016959-07	1.4	0.0021	143.902	-8.6792	2.15	-6.68	-0.699644
s-cd47-CD47-1	NCGC00183844-01	Sitafloxacin hydrate	TOP2B	4	0.0037	113.535	-8.4292	s-cd47-WT_JUR-1	NCGC00183844-01	-1.4	0.0187	117.379	-7.7292	-0.7	-3.844	-0.526591
s-cd47-CD47-1	NCGC00068236-08	Gatifloxacin	TOP2B	4	13.2066	111.413	-4.8792	s-cd47-WT_JUR-1	NCGC00068236-08	4	0.003	114.416	-8.5292	3.65	-3.003	-0.475272
s-cd47-CD47-1	NCGC00183881-01	Moxifloxacin hydrochloride	TOP2B	4		113.931		s-cd47-WT_JUR-1	NCGC00183881-01	-1.4	5.8992	113.597	-5.2292	5.2292	0.334	-0.271648
s-cd47-CD47-1	NCGC00166294-02	Sparfloxacin	TOP2B	4	0.3627	132.87	-6.4404	s-cd47-WT_JUR-1	NCGC00166294-02	4		119.141		-6.4404	13.729	0.54572
s-cd47-CD47-1	NCGC00016916-12	Norfloxacin	TOP2B	4		153.922		s-cd47-WT_JUR-1	NCGC00016916-12	4		132.783		0	21.139	0.997881
s-cd47-CD47-1	NCGC00346881-01	APR-246	TP53	-2.1	16.6261	0.453	-4.7792	s-cd47-WT_JUR-1	NCGC00346881-01	-1.1	1.4818	1.703	-5.8292	1.05	-1.25	-0.368304
s-cd47-CD47-1	NCGC00016229-13	Propylthiouracil	TPO	4		111.151		s-cd47-WT_JUR-1	NCGC00016229-13	-2.4	37.2212	82.824	-4.4292	4.4292	28.327	1.4365
s-cd47-CD47-1	NCGC00160398-04	Nafamostat mesilate	TPSAB1	-2.4	18.6548	82.439	-4.7292	s-cd47-WT_JUR-1	NCGC00160398-04	-2.4	16.6261	76.685	-4.7792	0.05	5.754	0.0590828
s-cd47-CD47-1	NCGC00181033-02	Taltirelin	TRHR	4	3.3173	99.937	-5.4792	s-cd47-WT_JUR-1	NCGC00181033-02	4	7.4266	105.215	-5.1292	-0.35	-5.278	-0.614094
s-cd47-CD47-1	NCGC00242501-01	ITX3	TRIO	4	13.2066	99.24	-4.8792	s-cd47-WT_JUR-1	NCGC00242501-01	-2.2	16.6261	87.429	-4.7792	-0.1	11.811	0.428683
s-cd47-CD47-1	NCGC00015389-08	Propofol	TRPV1	4		96.226		s-cd47-WT_JUR-1	NCGC00015389-08	4	0.2348	113.963	-6.6292	6.6292	-17.737	-1.37435
s-cd47-CD47-1	NCGC00346690-01	705498	TRPV1	-3	26.3506	18.681	-4.5792	s-cd47-WT_JUR-1	NCGC00346690-01	-3	33.1734	11.952	-4.4792	-0.1	6.729	0.118578
s-cd47-CD47-1	NCGC00263016-01	DE-096	TRPV4	-2.2	18.6548	64.557	-4.7292	s-cd47-WT_JUR-1	NCGC00263016-01	-2.2	14.818	53.455	-4.8292	0.1	11.102	0.38542
s-cd47-CD47-1	NCGC00250409-01	GSK-1016790A	TRPV4	-3	26.3506	12.99	-4.5792	s-cd47-WT_JUR-1	NCGC00250409-01	-2.1	23.485	1.696	-4.6292	0.05	11.294	0.397136
s-cd47-CD47-1	NCGC00263214-01	HC-067047	TRPV4	-2.1	18.6548	28.758	-4.7292	s-cd47-WT_JUR-1	NCGC00263214-01	-2.1	26.3506	9.967	-4.5792	-0.15	18.791	0.854605
s-cd47-CD47-1	NCGC00263090-01	AZ-3146	TTK	-2.1	20.931	1.601	-4.6792	s-cd47-WT_JUR-1	NCGC00263090-01	-2.1	20.931	9.727	-4.6792	0	-8.126	-0.78788
s-cd47-CD47-1	NCGC00263169-01	Plinabulin	TUBB	-2.2	2.148	8.098	-5.668	s-cd47-WT_JUR-1	NCGC00263169-01	-1.2	0.1914	9.621	-6.718	1.05	-1.523	-0.384962
s-cd47-CD47-1	NCGC00165966-02	Vinorelbine	TUBB	-1.1	0.0209	4.973	-7.6792	s-cd47-WT_JUR-1	NCGC00165966-02	-1.1	0.0066	3.269	-8.1792	0.5	1.704	-0.18805
s-cd47-CD47-1	NCGC00346731-01	Vinblastine	TUBB	-2.1	20.931	9.829	-4.6792	s-cd47-WT_JUR-1	NCGC00346731-01	-2.1	26.3506	4.657	-4.5792	-0.1	5.172	0.023569
s-cd47-CD47-1	NCGC00016806-12	Mebendazole	TUBB	-1.1	0.6619	17.949	-6.1792	s-cd47-WT_JUR-1	NCGC00016806-12	-1.1	0.3317	10.702	-6.4792	0.3	7.247	0.150186
s-cd47-CD47-1	NCGC00346580-01	Vinflunine	TUBB	-1.1	0.0023	21.067	-8.6292	s-cd47-WT_JUR-1	NCGC00346580-01	-1.1	0.0019	9.903	-8.7292	0.1	11.164	0.389203
s-cd47-CD47-1	NCGC00016706-05	Parbendazole	TUBB	-1.1	0.0059	28.412	-8.2292	s-cd47-WT_JUR-1	NCGC00016706-05	-1.1	0.0053	16.791	-8.2792	0.05	11.621	0.417089
s-cd47-CD47-1	NCGC00346805-01	XRP-44X	TUBB	-1.1	0.1321	33.65	-6.8792	s-cd47-WT_JUR-1	NCGC00346805-01	-1.1	0.1049	21.456	-6.9792	0.1	12.194	0.452054
s-cd47-CD47-1	NCGC00346704-01	Cabazitaxel	TUBB	4	0.003	35.395	-8.5292	s-cd47-WT_JUR-1	NCGC00346704-01	4	0.003	21.416	-8.5292	0	13.979	0.560975
s-cd47-CD47-1	NCGC00015647-03	Nocodazole	TUBB	-1.1	0.0083	27.638	-8.0792	s-cd47-WT_JUR-1	NCGC00015647-03	-1.1	0.0047	10.14	-8.3292	0.25	17.498	0.775706
s-cd47-CD47-1	NCGC00185772-01	Vindesine sulfate	TUBB	-1.1	0.0083	37	-8.0792	s-cd47-WT_JUR-1	NCGC00185772-01	-1.1	0.0037	17.777	-8.4292	0.35	19.223	0.880966
s-cd47-CD47-1	NCGC00181131-02	Epothilone B	TUBB	4		49.832		s-cd47-WT_JUR-1	NCGC00181131-02	4		27.108		0	22.724	1.0946
s-cd47-CD47-1	NCGC00263098-03	Combretastatin A-4	TUBB	4	0.0042	36.125	-8.3792	s-cd47-WT_JUR-1	NCGC00263098-03	4	0.0033	12.882	-8.4792	0.1	23.243	1.12627
s-cd47-CD47-1	NCGC00346661-01	Cephalomannine	TUBB	4	0.0083	45.625	-8.0792	s-cd47-WT_JUR-1	NCGC00346661-01	4	0.0059	22.158	-8.2292	0.15	23.467	1.13994
s-cd47-CD47-1	NCGC00166035-02	Demecolcine	TUBB	-1.1	0.0017	39.703	-8.7792	s-cd47-WT_JUR-1	NCGC00166035-02	-1.1	0.0015	14.285	-8.8292	0.05	25.418	1.25899
s-cd47-CD47-1	NCGC00346505-01	Epothilone A	TUBB	4	0.0166	52.727	-7.7792	s-cd47-WT_JUR-1	NCGC00346505-01	4		26.393		-7.7792	26.334	1.31488
s-cd47-CD47-1	NCGC00014650-03	Ansamitocin P3	TUBB	4	13.2066	32.337	-4.8792	s-cd47-WT_JUR-1	NCGC00014650-03	4	13.2066	5.732	-4.8792	0	26.605	1.33142
s-cd47-CD47-1	NCGC00160428-02	Indibulin	TUBB	-1.1	0.0372	48.851	-7.4292	s-cd47-WT_JUR-1	NCGC00160428-02	-1.1	0.0235	21.582	-7.6292	0.2	27.269	1.37194
s-cd47-CD47-1	NCGC00016388-03	Noscapine	TUBB	-1.1	0.1321	38.52	-6.8792	s-cd47-WT_JUR-1	NCGC00016388-03	-1.1	0.0469	10.875	-7.3292	0.45	27.645	1.39488
s-cd47-CD47-1	NCGC00163700-04	Vincristine sulfate	TUBB	-1.1	0.0047	37.863	-8.3292	s-cd47-WT_JUR-1	NCGC00163700-04	-1.1	0.0023	9.981	-8.6292	0.3	27.882	1.40934
s-cd47-CD47-1	NCGC00346937-01	Ombrabulin	TUBB	-1.1	0.0042	38.265	-8.3792	s-cd47-WT_JUR-1	NCGC00346937-01	-1.1	0.0026	9.585	-8.5792	0.2	28.68	1.45804
s-cd47-CD47-1	NCGC00181306-03	Docetaxel	TUBB	4	37.2212	57.66	-4.4292	s-cd47-WT_JUR-1	NCGC00181306-03	4	4.1763	24.806	-5.3792	0.95	32.854	1.71273
s-cd47-CD47-1	NCGC00346574-01	Lexibulin hydrochloride	TUBB	-1.2	0.0132	46.894	-7.8792	s-cd47-WT_JUR-1	NCGC00346574-01	-1.2	0.0105	13.896	-7.9792	0.1	32.998	1.72152
s-cd47-CD47-1	NCGC00346494-01	E-7010	TUBB	-1.1	0.0526	44.092	-7.2792	s-cd47-WT_JUR-1	NCGC00346494-01	-1.1	0.0469	10.419	-7.3292	0.05	33.673	1.76271
s-cd47-CD47-1	NCGC00024995-10	Paclitaxel	TUBB	4	0.0059	55.703	-8.2292	s-cd47-WT_JUR-1	NCGC00024995-10	-2.4	0.0662	19.451	-7.1792	-1.05	36.252	1.92008
s-cd47-CD47-1	NCGC00025125-20	Colchicine	TUBB	4	0.0074	45.702	-8.1292	s-cd47-WT_JUR-1	NCGC00025125-20	4	1.4818	9.264	-5.8292	-2.3	36.438	1.93143
s-cd47-CD47-1	NCGC00161927-03	4-Demethylepipodophyllotoxin	TUBB	-1.1	0.0372	78.185	-7.4292	s-cd47-WT_JUR-1	NCGC00161927-03	-1.1	0.0187	17.735	-7.7292	0.3	60.45	3.39665
s-cd47-CD47-1	NCGC00160391-05	Auranofin	TXNRD1	-1.1	0.8333	-0.607	-6.0792	s-cd47-WT_JUR-1	NCGC00160391-05	-1.1	0.2957	-0.076	-6.5292	0.45	-0.531	-0.32443
s-cd47-CD47-1	NCGC00160391-02	Auranofin	TXNRD1	-1.1	2.9566	3.815	-5.5292	s-cd47-WT_JUR-1	NCGC00160391-02	-1.1	1.6626	3.965	-5.7792	0.25	-0.15	-0.301181
s-cd47-CD47-1	NCGC00346876-01	PX-12	TXNRD1	-2.1	11.7704	9.676	-4.9292	s-cd47-WT_JUR-1	NCGC00346876-01	-1.1	4.6859	4.911	-5.3292	0.4	4.765	-0.0012663
s-cd47-CD47-1	NCGC00244250-02	NCGC00244250-01	TYK2	-2.2	14.818	41.654	-4.8292	s-cd47-WT_JUR-1	NCGC00244250-02	-2.2	18.6548	44.907	-4.7292	-0.1	-3.253	-0.490528
s-cd47-CD47-1	NCGC00345844-01	Bayer-18	TYK2	-2.2	16.6261	81.652	-4.7792	s-cd47-WT_JUR-1	NCGC00345844-01	-1.2	2.6351	77.549	-5.5792	0.8	4.103	-0.0416618
s-cd47-CD47-1	NCGC00263200-01	RO495	TYK2	-1.4	0.1482	38.025	-6.8292	s-cd47-WT_JUR-1	NCGC00263200-01	-1.1	0.3317	13.348	-6.4792	-0.35	24.677	1.21377
s-cd47-CD47-1	NCGC00093926-04	Doxifluridine	TYMS	-2.2	10.4904	56.104	-4.9792	s-cd47-WT_JUR-1	NCGC00093926-04	-2.2	16.6261	52.118	-4.7792	-0.2	3.986	-0.0488012
s-cd47-CD47-1	NCGC00242485-01	Pemetrexed disodium	TYMS	-1.2	0.935	43.305	-6.0292	s-cd47-WT_JUR-1	NCGC00242485-01	-1.1	0.8333	31.568	-6.0792	0.05	11.737	0.424168
s-cd47-CD47-1	NCGC00229704-01	Raltitrexed	TYMS	-1.2	0.0743	59.656	-7.1292	s-cd47-WT_JUR-1	NCGC00229704-01	-1.1	0.0526	22.166	-7.2792	0.15	37.49	1.99563
s-cd47-CD47-1	NCGC00166323-03	Trifluridine	TYMS	-1.2	0.8333	57.881	-6.0792	s-cd47-WT_JUR-1	NCGC00166323-03	-1.1	1.177	10.459	-5.9292	-0.15	47.422	2.60168
s-cd47-CD47-1	NCGC00263555-02	Spautin-1	USP10	-2.4	14.818	66.622	-4.8292	s-cd47-WT_JUR-1	NCGC00263555-02	-2.2	14.818	75.233	-4.8292	0	-8.611	-0.817475
s-cd47-CD47-1	NCGC00262398-03	NCGC00262398	USP2	-2.2	10.4904	44.718	-4.9792	s-cd47-WT_JUR-1	NCGC00262398-03	-1.1	9.3495	24.37	-5.0292	0.05	20.348	0.949614
s-cd47-CD47-1	NCGC00242511-02	Seocalcitol	VDR	-2.1	23.485	1.516	-4.6292	s-cd47-WT_JUR-1	NCGC00242511-02	-2.1	18.6548	3.111	-4.7292	0.1	-1.595	-0.389356
s-cd47-CD47-1	NCGC00182058-03	Doxercalciferol	VDR	-1.1	2.9566	1.857	-5.5292	s-cd47-WT_JUR-1	NCGC00182058-03	-1.1	1.6626	2.597	-5.7792	0.25	-0.74	-0.337183
s-cd47-CD47-1	NCGC00161327-05	Calcitriol	VDR	-1.1	8.3328	4.514	-5.0792	s-cd47-WT_JUR-1	NCGC00161327-05	-1.1	7.4266	3.941	-5.1292	0.05	0.573	-0.257064
s-cd47-CD47-1	NCGC00181350-02	Vatalanib	VEGFA	-2.2	18.6548	60.983	-4.7292	s-cd47-WT_JUR-1	NCGC00181350-02	-3	26.3506	14.015	-4.5792	-0.15	46.968	2.57398
s-cd47-CD47-1	NCGC00094810-06	Warfarin sodium	VKORC1	4	1.3207	121.897	-5.8792	s-cd47-WT_JUR-1	NCGC00094810-06	1.2	0.003	100.275	-8.5292	2.65	21.622	1.02735
s-cd47-CD47-1	NCGC00263183-01	MK-1775	WEE1	-1.2	0.2093	36.376	-6.6792	s-cd47-WT_JUR-1	NCGC00263183-01	-1.1	0.2635	14.928	-6.5792	-0.1	21.448	1.01674
s-cd47-CD47-1	NCGC00095055-03	Salinomycin	WNT1	-2.1	5.8992	5.366	-5.2292	s-cd47-WT_JUR-1	NCGC00095055-03	-1.1	2.3485	5.778	-5.6292	0.4	-0.412	-0.317169
s-cd47-CD47-1	NCGC00347949-01	KY02111	WNT5A	4	37.2212	84.999	-4.4292	s-cd47-WT_JUR-1	NCGC00347949-01	-1.4	0.3317	89.607	-6.4792	2.05	-4.608	-0.57321
s-cd47-CD47-1	NCGC00263116-01	ICG-001	WNT5A	-2.2	9.3495	28.445	-5.0292	s-cd47-WT_JUR-1	NCGC00263116-01	-1.1	3.3173	24.096	-5.4792	0.45	4.349	-0.0266508
s-cd47-CD47-1	NCGC00263085-01	Wnt-C59	WNT5A	-2.4	23.485	77.323	-4.6292	s-cd47-WT_JUR-1	NCGC00263085-01	-2.2	20.931	72.138	-4.6792	0.05	5.185	0.0243623
s-cd47-CD47-1	NCGC00346879-01	PNU-74654	WNT5A	-2.2	23.485	42.374	-4.6292	s-cd47-WT_JUR-1	NCGC00346879-01	-3	29.5659	26.865	-4.5292	-0.1	15.509	0.654336
s-cd47-CD47-1	NCGC00094580-05	Allopurinol	XDH	4	16.6261	80.63	-4.7792	s-cd47-WT_JUR-1	NCGC00094580-05	4	0.0021	94.801	-8.6792	3.9	-14.171	-1.15675
s-cd47-CD47-1	NCGC00182059-02	Febuxostat	XDH	4		92.818		s-cd47-WT_JUR-1	NCGC00182059-02	4	13.2066	96.938	-4.8792	4.8792	-4.12	-0.543432
s-cd47-CD47-1	NCGC00263135-01	Piraxostat	XDH	4	3.7221	108.876	-5.4292	s-cd47-WT_JUR-1	NCGC00263135-01	4	5.2576	104.828	-5.2792	-0.15	4.048	-0.0450179
s-cd47-CD47-1	NCGC00263236-01	SM-164	XIAP	-1.4	0.0059	54.48	-8.2292	s-cd47-WT_JUR-1	NCGC00263236-01	-2.4	10.4904	83.509	-4.9792	-3.25	-29.029	-2.06339
s-cd47-CD47-1	NCGC00346475-01	Birinapant	XIAP	-2.1	4.6859	18.081	-5.3292	s-cd47-WT_JUR-1	NCGC00346475-01	-1.3	8.3328	16.23	-5.0792	-0.25	1.851	-0.17908
s-cd47-CD47-1	NCGC00346675-01	AT-406	XIAP	-2.2	20.931	41.693	-4.6792	s-cd47-WT_JUR-1	NCGC00346675-01	-2.1	23.485	28.82	-4.6292	-0.05	12.873	0.493487
s-cd47-CD47-1	NCGC00017248-10	Embelin	XIAP	-1.2	9.3495	42.461	-5.0292	s-cd47-WT_JUR-1	NCGC00017248-10	-1.1	9.3495	23.95	-5.0292	0	18.511	0.83752
s-cd47-CD47-1	NCGC00181170-03	Bendamustine	XRCC1	-1.4	0.2348	122.856	-6.6292	s-cd47-WT_JUR-1	NCGC00181170-03	-2.1	23.485	25.146	-4.6292	-2	97.71	5.67027

## Sheet: Pan Active Max Resp <20
Sample ID	Name	Target	Curve Class2 CD47 KO	AC50(uM) CD47 KO	Max Resp CD47 KO	Log AC50 CD47 KO	Curve Class2 WT	AC50(uM) WT	Max Resp WT	Log AC50 WT	Delta LogAC50 CD47KO-WT	Delta Max Resp CD47KO -WT	z-score Delta Max Resp CD47KO-WT		Target	p	padj
NCGC00183285-04	Nilotinib	ABL1	-2.1	10.4904	6.782	-4.9792	-2.1	10.4904	18.545	-4.9792	0	-11.763	-1.00981		HDAC1	9.71031e-10	1.49539e-07
NCGC00241107-03	Bosutinib	ABL1	-2.1	18.6548	3.279	-4.7292	-2.1	16.6261	3.129	-4.7792	0.05	0.15	-0.282875		EGFR	4.54279e-06	0.000349795
NCGC00346956-01	HMSL10015	ABL1	-2.1	14.818	16.954	-4.8292	-2.1	5.8992	4.211	-5.2292	0.4	12.743	0.485554		PSMD1	3.08389e-05	0.00158307
NCGC00346514-01	Bafetinib	ABL1, LYN	-2.1	18.6548	1.872	-4.7292	-2.1	16.6261	2.665	-4.7792	0.05	-0.793	-0.340417		HDAC6	0.00208576	0.0642415
NCGC00165740-04	Benzapril	ACE	-2.1	18.6548	0.338	-4.7292	-2.3	16.6261	1.634	-4.7792	0.05	-1.296	-0.371111		ITK	0.00208576	0.0642415
NCGC00178127-04	Ramipril	ACE	-2.1	16.6261	1.443	-4.7792	-2.1	16.6261	2.536	-4.7792	0	-1.093	-0.358724		JAK2	0.0101456	0.260403
NCGC00181345-01	Temocapril hydrochloride	ACE	-2.1	16.6261	5.808	-4.7792	-1.1	10.4904	1.918	-4.9792	0.2	3.89	-0.0546591		STAT3	0.0139051	0.305912
NCGC00165880-04	Reversine	ADORA3	-1.1	8.3328	3.459	-5.0792	-2.1	11.7704	10.546	-4.9292	-0.15	-7.087	-0.72448		AR	0.0237848	0.398113
NCGC00016740-19	Prazosin hydrochloride	ADRA1A	-1.1	9.3495	0.186	-5.0292	-1.1	10.4904	1.712	-4.9792	-0.05	-1.526	-0.385145		AKT1	0.0255378	0.398113
NCGC00018158-08	Doxazosin mesylate	ADRA1A	-2.1	20.931	11.99	-4.6792	-3	29.5659	3.424	-4.5292	-0.15	8.566	0.230672		PRKCA	0.0258515	0.398113
NCGC00142615-03	Epinephrine	ADRA1A	-2.1	34.0429	4.704	-4.468	-1.1	17.0619	3.103	-4.768	0.3	1.601	-0.194335		CDK4	0.0458463	0.543102
NCGC00188863-01	Dronedarone	ADRA1A	1.3	0.0105	1.6	-7.9792	-2.1	11.7704	2.419	-4.9292	-3.05	-0.819	-0.342004		TXNRD1	0.0458463	0.543102
NCGC00183875-01	Nebivolol	ADRB1	-2.1	20.931	1.823	-4.6792	-2.1	26.3506	1.2	-4.5792	-0.1	0.623	-0.254013		VDR	0.0458463	0.543102
NCGC00263553-02	StemRegenin 1	AHR	-2.1	14.818	-1.728	-4.8292	-2.1	16.6261	-0.116	-4.7792	-0.05	-1.612	-0.390393		BCL2L1	0.0692573	0.711042
NCGC00162073-05	H-89	AKT1	-2.1	20.931	14.164	-4.6792	-2.1	23.485	6.398	-4.6292	-0.05	7.766	0.181856		CHEK1	0.0692573	0.711042
NCGC00165727-02	AKT inhibitor VIII	AKT1	-2.1	18.6548	0.786	-4.7292	-2.1	20.931	2.26	-4.6792	-0.05	-1.474	-0.381972		FGFR	0.116933	1
NCGC00263147-01	A-674563	AKT1	-2.1	4.1763	10.166	-5.3792	-1.1	3.3173	1.067	-5.4792	0.1	9.099	0.263196		MCL1	0.117962	1
NCGC00345823-01	Akt-I-1,2	AKT1	-2.1	20.931	18.392	-4.6792	-2.1	23.485	4.973	-4.6292	-0.05	13.419	0.526804		KDR	0.173184	1
NCGC00345840-01	Merck-22-6	AKT1	-1.1	3.3173	-0.939	-5.4792	-1.1	5.2576	0.225	-5.2792	-0.2	-1.164	-0.363056		PIK3CA	0.173681	1
NCGC00346549-01	AT-7867	AKT1	-2.1	20.931	14.672	-4.6792	-2.1	20.931	5.714	-4.6792	0	8.958	0.254592		DHFR	0.203029	1
NCGC00346621-01	CCT-128930	AKT1	-2.1	7.4266	18.863	-5.1292	-2.1	18.6548	10.681	-4.7292	-0.4	8.182	0.20724		KIF11	0.203029	1
NCGC00347278-01	A-443654	AKT1	-1.1	0.8333	12.002	-6.0792	-1.1	1.3207	-0.02	-5.8792	-0.2	12.022	0.441558		LCK	0.203029	1
NCGC00016000-10	Disulfiram	ALDH2	-2.3	26.3506	1.875	-4.5792	-2.4	16.6261	3.206	-4.7792	0.2	-1.331	-0.373246		CDC25	0.214323	1
NCGC00238453-01	TAE-684	ALK	-2.3	26.3506	-0.2	-4.5792	-2.3	26.3506	0.311	-4.5792	0	-0.511	-0.32321		CDC42	0.214323	1
NCGC00345791-01	ASP-3026	ALK	-2.1	37.2212	1.568	-4.4292	-2.1	23.485	1.56	-4.6292	0.2	0.008	-0.29154		COX10	0.214323	1
NCGC00185090-03	NCGC00185090-04	APE1	-2.1	18.6548	4.029	-4.7292	-2.1	26.3506	2.758	-4.5792	-0.15	1.271	-0.214471		DDR1	0.214323	1
NCGC00015452-19	Flutamide	AR	-1.1	7.4266	3.159	-5.1292	-1.1	10.4904	3.193	-4.9792	-0.15	-0.034	-0.294103		EHMT2	0.214323	1
NCGC00091014-06	Hydroxyflutamide	AR	-3	37.2212	5.726	-4.4292	-3	33.1734	6.879	-4.4792	0.05	-1.153	-0.362385		NRC31	0.214323	1
NCGC00091032-08	Cyproterone acetate	AR	-3	33.1734	2.64	-4.4792	-3	26.3506	7.341	-4.5792	0.1	-4.701	-0.578885		ABL1	0.235118	1
NCGC00093560-06	Finasteride	AR	-1.1	1.049	1.534	-5.9792	-1.1	2.9566	1.479	-5.5292	-0.45	0.055	-0.288672		IGFR1	0.235118	1
NCGC00095348-07	Diindolylmethane	AR	-1.1	4.1763	0.848	-5.3792	-1.1	7.4266	2.168	-5.1292	-0.25	-1.32	-0.372575		MTOR	0.244157	1
NCGC00167487-01	(R)-Bicalutamide	AR	-1.1	1.3207	2.45	-5.8792	-1.1	2.6351	2.368	-5.5792	-0.3	0.082	-0.287025		ACE	0.292211	1
NCGC00167977-03	Bicalutamide	AR	-1.1	1.049	2.038	-5.9792	-1.1	1.3207	2.678	-5.8792	-0.1	-0.64	-0.331081		PDE5A	0.292211	1
NCGC00263137-01	RD-162	AR	-2.1	23.485	5.875	-4.6292	-3	33.1734	5.013	-4.4792	-0.15	0.862	-0.239429		PLK1	0.292211	1
NCGC00346725-01	ARN-509	AR	-1.1	1.4818	0.351	-5.8292	-1.1	2.9566	0.828	-5.5292	-0.3	-0.477	-0.321135		IKBKB	0.365698	1
NCGC00159574-02	ZM 44739	AURKA	-2.1	20.931	2.608	-4.6792	-2.1	20.931	2.785	-4.6792	0	-0.177	-0.302829		ALK	0.3828	1
NCGC00263178-01	ENMD-981693	AURKA	-2.1	42.8575	3.318	-4.368	-2.1	15.2064	3.017	-4.818	0.45	0.301	-0.273661		BRD4	0.3828	1
NCGC00263204-01	CYC-116	AURKA	-2.1	9.3495	19.471	-5.0292	-2.1	16.6261	9.906	-4.7792	-0.25	9.565	0.291631		CERS1	0.3828	1
NCGC00346525-01	Aurora A Inhibitor I	AURKA	-1.1	5.2576	0.029	-5.2792	-1.1	3.3173	1.265	-5.4792	0.2	-1.236	-0.367449		CNR1	0.3828	1
NCGC00346542-01	Hesperadin	AURKA	-2.1	18.6548	5.655	-4.7292	-2.1	18.6548	1.227	-4.7292	0	4.428	-0.0218302		MAPK7	0.3828	1
NCGC00346676-01	CCT-137690	AURKA	-1.1	8.3328	0.028	-5.0792	-1.1	8.3328	0.919	-5.0792	0	-0.891	-0.346397		OPRL1	0.3828	1
NCGC00346648-01	GSK-1070916A	AURKB	-2.1	16.6261	0.52	-4.7792	-2.1	13.2066	0.626	-4.8792	0.1	-0.106	-0.298496		PDGFRB	0.3828	1
NCGC00025207-06	HA-14-1	BCL2	-3	26.3506	2.207	-4.5792	-2.1	26.3506	2.01	-4.5792	0	0.197	-0.280007		SLC6A4	0.3828	1
NCGC00345789-01	ABT-199	BCL2	-2.1	11.7704	13.048	-4.9292	-1.1	6.619	2.921	-5.1792	0.25	10.127	0.325925		AURKA	0.385972	1
NCGC00015225-03	Chelerythrine chloride	BCL2L1	-1.1	7.4266	1.037	-5.1292	-1.1	5.2576	1.971	-5.2792	0.15	-0.934	-0.349021		NFKB1	0.405896	1
NCGC00016423-14	(-)-Gossypol	BCL2L1	-1.1	6.619	1.771	-5.1792	-1.1	6.619	3.058	-5.1792	0	-1.287	-0.370562		MAPK8	0.462516	1
NCGC00188344-05	Navitoclax	BCL2L1	-2.1	5.8992	0.827	-5.2292	-1.1	0.2348	1.628	-6.6292	1.4	-0.801	-0.340906		PDE4A	0.492172	1
NCGC00263166-01	Obatoclax	BCL2L1	-1.1	1.4818	2.689	-5.8292	-1.1	0.3722	1.106	-6.4292	0.6	1.583	-0.195433		BCL2	0.515218	1
NCGC00242514-01	Sepantronium bromide	BIRC5	-1.1	0.0833	1.144	-7.0792	-1.1	0.0526	1.105	-7.2792	0.2	0.039	-0.289649		BTK	0.515218	1
NCGC00249389-01	LDN-193189	BMPR1A	-2.3	9.3495	0.205	-5.0292	-1.3	6.619	0.89	-5.1792	0.15	-0.685	-0.333827		CAMKK2	0.515218	1
NCGC00242249-02	SB-590885	BRAF	-2.1	20.931	-0.837	-4.6792	-2.1	18.6548	-0.523	-4.7292	0.05	-0.314	-0.311189		KIT	0.515218	1
NCGC00249391-01	NVP-BHG712	BRAF	-2.1	11.7704	2.252	-4.9292	-1.1	9.3495	0.648	-5.0292	0.1	1.604	-0.194152		PIM1	0.515218	1
NCGC00250399-01	Vemurafenib	BRAF	-2.1	18.6548	6.748	-4.7292	-2.1	20.931	2.075	-4.6792	-0.05	4.673	-0.00688017		ADRA1A	0.604886	1
NCGC00250412-01	JQ1	BRD4	-2.1	4.6859	6.937	-5.3292	-2.1	3.7221	2.182	-5.4292	0.1	4.755	-0.0018765		HSP90AB1	0.604886	1
NCGC00344588-01	I-BET151	BRD4	-2.1	20.931	6.882	-4.6792	-2.1	5.8992	0.957	-5.2292	0.55	5.925	0.0695173		ERBB2	0.619282	1
NCGC00187912-03	PCI-32765	BTK	-2.1	20.931	17.724	-4.6792	-2.1	18.6548	1.828	-4.7292	0.05	15.896	0.677951		PDPK1	0.619282	1
NCGC00346962-01	HMSL10077	BTK	-1.1	4.6859	0.463	-5.3292	-1.1	2.6351	1.245	-5.5792	0.25	-0.782	-0.339746		SRC	0.619282	1
NCGC00015233-04	Calmidazolium chloride	CAMKK2	-2.1	13.2066	-0.156	-4.8792	-2.1	14.818	0.552	-4.8292	-0.05	-0.708	-0.335231		MET	0.654633	1
NCGC00250376-01	KN-93	CAMKK2	-2.1	20.931	4.296	-4.6792	-2.1	20.931	6.461	-4.6792	0	-2.165	-0.424137		HRH1	0.666562	1
NCGC00163489-04	Shikonin	CCR5	-1.1	1.3207	1.016	-5.8792	-1.1	1.049	2.763	-5.9792	0.1	-1.747	-0.398631		FLT1	0.699725	1
NCGC00016258-07	Menadione	CDC25	-2.1	14.818	-0.719	-4.8292	-2.1	14.818	0.851	-4.8292	0	-1.57	-0.38783		PRKDC	0.701049	1
NCGC00092289-01	DA-3003-1	CDC25	-1.1	2.6351	-0.912	-5.5792	-1.1	3.7221	-0.179	-5.4292	-0.15	-0.733	-0.336756		CDK1	0.740202	1
NCGC00263209-02	ML 141	CDC42	-2.1	16.6261	12.475	-4.7792	-2.1	18.6548	13.002	-4.7292	-0.05	-0.527	-0.324186		BRAF	0.76447	1
NCGC00347941-01	CASIN	CDC42	-2.1	23.485	0.021	-4.6292	-2.1	16.6261	1.637	-4.7792	0.15	-1.616	-0.390637		PfATP6	0.765289	1
NCGC00025219-04	Purvalanol A	CDK1	-2.1	16.6261	15.32	-4.7792	-2.1	20.931	1.815	-4.6792	-0.1	13.505	0.532052		GSK3B	0.88651	1
NCGC00346617-01	AZD-5438	CDK1	-1.1	2.0931	18.763	-5.6792	-1.1	3.7221	0.801	-5.4292	-0.25	17.962	0.804019		TUBB	0.9288	1
NCGC00346827-01	7-Hydroxystaurosporine	CDK1	-1.1	0.6619	0.797	-6.1792	-1.1	0.4686	1.869	-6.3292	0.15	-1.072	-0.357442		DRD2	0.930134	1
NCGC00346940-01	CGP-60474	CDK1	-1.1	0.1177	12.54	-6.9292	-1.1	0.1663	2.599	-6.7792	-0.15	9.941	0.314575		TERT	0.966291	1
NCGC00263191-01	PHA-690509	CDK2	-1.1	1.4818	17.268	-5.8292	-1.1	3.3173	2.502	-5.4792	-0.35	14.766	0.608998		TOP2A	0.966291	1
NCGC00263129-01	PD-0332991	CDK4	-2.1	16.6261	1.831	-4.7792	-2.1	14.818	0.52	-4.8292	0.05	1.311	-0.212031		MAPK14	0.973569	1
NCGC00346951-01	Fascaplysin	CDK4	-1.1	1.8655	0.455	-5.7292	-1.1	1.3207	0.801	-5.8792	0.15	-0.346	-0.313141		ADORA3	1	1
NCGC00346952-01	Cdk4/6 Inhibitor IV	CDK4	-2.1	26.3506	4.473	-4.5792	-2.1	23.485	2.62	-4.6292	0.05	1.853	-0.178958		ADRB1	1	1
NCGC00346553-01	BS-181	CDK7	-2.1	16.6261	1.171	-4.7792	-2.1	18.6548	1.187	-4.7292	-0.05	-0.016	-0.293005		AHR	1	1
NCGC00346943-01	GSK-923295	CENPE	-2.1	4.6859	2.839	-5.3292	-1.1	0.2635	4.95	-6.5792	1.25	-2.111	-0.420842		ALDH2	1	1
NCGC00263217-01	NVP231	CERS1	-1.1	4.1763	13.445	-5.3792	-1.1	2.6351	6.085	-5.5792	0.2	7.36	0.157082		APE1	1	1
NCGC00263224-01	D-NMAPPD	CERS1	-2.1	18.6548	1.676	-4.7292	-2.1	18.6548	0.669	-4.7292	0	1.007	-0.230581		AURKB	1	1
NCGC00263132-02	PF-477736	CHEK1	-1.1	0.3317	14.494	-6.4792	-1.1	0.5258	2.213	-6.2792	-0.2	12.281	0.457363		BIRC5	1	1
NCGC00346626-01	CHIR-124	CHEK1	-2.1	1.4818	0.474	-5.8292	-1.1	0.1177	1.158	-6.9292	1.1	-0.684	-0.333766		BMPR1A	1	1
NCGC00346653-01	SCH-900776	CHEK1	-1.2	1.4818	19.896	-5.8292	-1.1	0.3722	12.824	-6.4292	0.6	7.072	0.139508		CCR5	1	1
NCGC00346954-01	TCS-2312	CHEK1	-1.1	2.6351	7.707	-5.5792	-1.1	0.935	2.936	-6.0292	0.45	4.771	-0.000900178		CDK2	1	1
NCGC00346436-01	CCT-241533	CHEK2	-2.1	23.485	2.722	-4.6292	-2.1	23.485	4.008	-4.6292	0	-1.286	-0.370501		CDK7	1	1
NCGC00016210-06	WIN-55212-2	CNR1	-2.1	20.931	8.149	-4.6792	-2.1	23.485	2.394	-4.6292	-0.05	5.755	0.0591439		CENPE	1	1
NCGC00164572-01	Rimonabant	CNR1	-2.1	16.6261	12.325	-4.7792	-2.1	18.6548	5.356	-4.7292	-0.05	6.969	0.133223		CHEK2	1	1
NCGC00250406-01	Tipifarnib	COX10	-2.1	5.8992	3.808	-5.2292	-2.1	5.8992	0.015	-5.2292	0	3.793	-0.0605781		CSF1R	1	1
NCGC00346707-01	Lonafarnib	COX10	-2.1	16.6261	6.165	-4.7792	-2.1	16.6261	-0.402	-4.7792	0	6.567	0.108692		CSNK1A2	1	1
NCGC00348107-01	c-FMS inhibitor	CSF1R	-2.1	23.485	12.127	-4.6292	-3	37.2212	13.641	-4.4292	-0.2	-1.514	-0.384413		CTSB	1	1
NCGC00263192-02	Silmitasertib	CSNK1A2	-2.1	8.3328	11.506	-5.0792	-1.1	5.8992	5.359	-5.2292	0.15	6.147	0.0830638		CXCR1	1	1
NCGC00163431-03	CA-074 Me	CTSB	-2.1	14.818	8.068	-4.8292	-2.1	9.3495	2.608	-5.0292	0.2	5.46	0.0411429		CYP19A1	1	1
NCGC00263128-01	PD-0220245	CXCR1	-1.1	9.3495	2.639	-5.0292	-1.1	8.3328	4.675	-5.0792	0.05	-2.036	-0.416266		CYSLTR1	1	1
NCGC00018294-06	Miconazole nitrate	CYP19A1	-2.1	18.6548	8.864	-4.7292	-2.1	20.931	4.956	-4.6792	-0.05	3.908	-0.0535607		DDC	1	1
NCGC00164547-06	Zafirlukast	CYSLTR1	-2.1	16.6261	0.763	-4.7792	-2.1	18.6548	2.379	-4.7292	-0.05	-1.616	-0.390637		ELA2	1	1
NCGC00015163-08	Benserazide	DDC	-2.1	14.818	2.259	-4.8292	-2.1	23.485	2.778	-4.6292	-0.2	-0.519	-0.323698		ESR1	1	1
NCGC00346961-01	HMSL10076	DDR1	-2.1	16.6261	3.867	-4.7792	-2.1	18.6548	1.806	-4.7292	-0.05	2.061	-0.166265		FLT4	1	1
NCGC00347217-01	PRP003-013	DDR1	-2.1	11.7704	2.646	-4.9292	-1.1	8.3328	2.532	-5.0792	0.15	0.114	-0.285072		GBF1	1	1
NCGC00016256-16	Pyrimethamine	DHFR	-1.1	2.0931	8.807	-5.6792	-1.1	1.6626	16.367	-5.7792	0.1	-7.56	-0.753342		GCK	1	1
NCGC00161419-03	Trimetrexate	DHFR	-1.1	0.935	0.503	-6.0292	-1.1	1.049	4.613	-5.9792	-0.05	-4.11	-0.542822		GRM1	1	1
NCGC00242596-01	Pralatrexate	DHFR	-1.1	0.0372	8.967	-7.4292	-1.1	0.0469	18.713	-7.3292	-0.1	-9.746	-0.886733		GRM5	1	1
NCGC00015436-09	Fluphenazine hydrochloride	DRD2	-2.1	23.485	3.978	-4.6292	-3	26.3506	4.723	-4.5792	-0.05	-0.745	-0.337488		HPRT1	1	1
NCGC00015856-08	Prochlorperazine	DRD2	-2.1	23.485	9.788	-4.6292	-3	26.3506	16.175	-4.5792	-0.05	-6.387	-0.681765		HTR4	1	1
NCGC00159455-04	Gefitinib	EGFR	-2.1	27.0412	1.52	-4.568	-2.1	34.0429	2.495	-4.468	-0.1	-0.975	-0.351523		IDH1	1	1
NCGC00167507-03	Lapatinib	EGFR	-1.1	0.8333	0.625	-6.0792	-1.1	1.049	1.775	-5.9792	-0.1	-1.15	-0.362202		IDO1	1	1
NCGC00167513-03	Vandetanib	EGFR	-2.1	26.3506	-0.138	-4.5792	-2.1	20.931	0.94	-4.6792	0.1	-1.078	-0.357808		IKBKE	1	1
NCGC00182713-01	Canertinib	EGFR	-2.1	16.6261	0.296	-4.7792	-2.1	14.818	0.978	-4.8292	0.05	-0.682	-0.333644		IL2	1	1
NCGC00185000-03	Afatinib	EGFR	-2.1	8.3328	2.357	-5.0792	-1.1	4.6859	3.468	-5.3292	0.25	-1.111	-0.359822		JAK1	1	1
NCGC00263103-01	Pelitinib	EGFR	-1.1	0.4176	2.087	-6.3792	-1.1	0.4176	2.597	-6.3792	0	-0.51	-0.323149		LTA4H	1	1
NCGC00263144-02	WZ-4002	EGFR	-2.2	14.818	-0.545	-4.8292	-2.1	5.2576	1.229	-5.2792	0.45	-1.774	-0.400278		LYN	1	1
NCGC00263149-01	AEE-788	EGFR	-2.4	20.931	2.172	-4.6792	-2.4	1.8655	2.85	-5.7292	1.05	-0.678	-0.3334		MAP2K1	1	1
NCGC00263177-01	CUDC-101	EGFR	-1.1	0.0526	4.513	-7.2792	-1.1	0.0418	1.945	-7.3792	0.1	2.568	-0.135328		MAP3K8	1	1
NCGC00263185-01	Dacomitinib	EGFR	-2.1	16.6261	-0.219	-4.7792	-2.1	13.2066	0.849	-4.8792	0.1	-1.068	-0.357198		MDM2	1	1
NCGC00263195-01	AV-412	EGFR	-1.1	2.3485	0.22	-5.6292	-1.1	1.3207	0.397	-5.8792	0.25	-0.177	-0.302829		MDM4	1	1
NCGC00346483-01	AC-480	EGFR	-2.2	5.8992	7.297	-5.2292	-1.1	5.2576	4.719	-5.2792	0.05	2.578	-0.134718		MMP1	1	1
NCGC00346496-01	WZ-3146	EGFR	-2.1	13.2066	1.232	-4.8792	-2.1	4.1763	0.173	-5.3792	0.5	1.059	-0.227408		MMP2	1	1
NCGC00346497-01	WZ-8040	EGFR	-2.3	11.7704	1.152	-4.9292	-2.3	5.2576	1.824	-5.2792	0.35	-0.672	-0.333034		NAMPT	1	1
NCGC00346699-01	TAK-285	EGFR	-2.3	4.6859	4.424	-5.3292	-2.1	23.485	4.437	-4.6292	-0.7	-0.013	-0.292822		NFE2L3	1	1
NCGC00346724-01	Varlitinib tosylate	EGFR	-2.1	16.6261	13.313	-4.7792	-2.1	16.6261	12.304	-4.7792	0	1.009	-0.230459		NKAIN1	1	1
NCGC00347284-01	XL-647	EGFR	-2.1	11.7704	0.682	-4.9292	-1.1	3.7221	1.135	-5.4292	0.5	-0.453	-0.319671		NR1I2	1	1
NCGC00185850-02	BIX-01294	EHMT2	-1.1	5.2576	1.846	-5.2792	-1.1	3.7221	2.216	-5.4292	0.15	-0.37	-0.314606		NTRK1	1	1
NCGC00189220-05	UNC-0638	EHMT2	-1.1	6.619	1.041	-5.1792	-1.1	4.1763	1.56	-5.3792	0.2	-0.519	-0.323698		OPRM1	1	1
NCGC00167751-03	SSR-69071	ELA2	-1.1	11.7704	15.368	-4.9292	-2.1	16.6261	5.068	-4.7792	-0.15	10.3	0.336481		P2RX7	1	1
NCGC00346478-02	AST-1306	ERBB2	-1.1	1.049	-0.67	-5.9792	-1.1	0.2635	0.302	-6.5792	0.6	-0.972	-0.35134		PADI1	1	1
NCGC00346672-01	ARRY-380	ERBB2	-2.1	18.6548	0.073	-4.7292	-2.1	16.6261	1.132	-4.7792	0.05	-1.059	-0.356649		PAK1	1	1
NCGC00015889-10	Raloxifene hydrochloride	ESR1	-2.1	16.6261	1.358	-4.7792	-2.1	20.931	2.145	-4.6792	-0.1	-0.787	-0.340051		PAK4	1	1
NCGC00165863-02	PD-173074	FGFR	-2.1	14.818	-0.452	-4.8292	-2.1	10.4904	0.514	-4.9792	0.15	-0.966	-0.350974		PAR1	1	1
NCGC00249685-02	Dovitinib	FGFR	-2.1	14.818	1.123	-4.8292	-2.1	10.4904	1.566	-4.9792	0.15	-0.443	-0.31906		PDE1	1	1
NCGC00263152-02	Ponatinib	FGFR	-1.1	4.1763	0.597	-5.3792	-1.1	3.3173	1.915	-5.4792	0.1	-1.318	-0.372453		PDGFRA	1	1
NCGC00346713-01	AZD-4547	FGFR	-2.1	18.6548	2.217	-4.7292	-2.1	26.3506	3.039	-4.5792	-0.15	-0.822	-0.342187		PGR	1	1
NCGC00164631-03	Sunitinib malate	FLT1	-1.1	6.7925	0.656	-5.168	-1.1	7.6213	1.31	-5.118	-0.05	-0.654	-0.331936		PIKFYVE	1	1
NCGC00167488-03	Sorafenib	FLT1	-2.1	20.931	1.026	-4.6792	-2.1	14.818	1.996	-4.8292	0.15	-0.97	-0.351218		PNP	1	1
NCGC00263097-01	Cediranib	FLT1	-2.1	20.931	2.569	-4.6792	-2.1	26.3506	3.033	-4.5792	-0.1	-0.464	-0.320342		POLR2A	1	1
NCGC00345821-01	AG-13958	FLT1	-2.1	14.818	3.599	-4.8292	-2.1	13.2066	4.882	-4.8792	0.05	-1.283	-0.370317		PPP1CA	1	1
NCGC00346965-01	HMSL10087	FLT4	-3	37.2212	3.261	-4.4292	-2.1	23.485	2.648	-4.6292	0.2	0.613	-0.254623		PRDX1	1	1
NCGC00017254-02	Cyanein	GBF1	-1.2	0.0047	17.146	-8.3292	-1.1	0.0094	5.758	-8.0292	-0.3	11.388	0.402872		PRKCB	1	1
NCGC00346628-01	LY-2608204	GCK	-2.1	13.2066	2.362	-4.8792	-2.1	14.818	2.451	-4.8292	-0.05	-0.089	-0.297459		PTK6	1	1
NCGC00092375-02	JNJ-16259685	GRM1	-2.1	23.485	0.24	-4.6292	-2.1	20.931	1.513	-4.6792	0.05	-1.273	-0.369707		RARB	1	1
NCGC00092384-04	Fenobam	GRM5	-3	33.1734	9.103	-4.4792	-3	37.2212	1.202	-4.4292	-0.05	7.901	0.190094		RARG	1	1
NCGC00094112-06	BIO	GSK3B	-2.1	13.2066	0.901	-4.8792	-2.1	8.3328	1.161	-5.0792	0.2	-0.26	-0.307894		ROCK1	1	1
NCGC00346883-01	6-Bromoindirubin-3'-acetoxime	GSK3B	-2.1	10.4904	8.792	-4.9792	-1.1	5.8992	2.914	-5.2292	0.25	5.878	0.0666494		RPS6KA1	1	1
NCGC00162453-10	Trichostatin A	HDAC1	-1.1	0.6619	0.791	-6.1792	-1.1	0.2093	-0.99	-6.6792	0.5	1.781	-0.183351		S1PR1	1	1
NCGC00168085-02	Vorinostat	HDAC1	-1.1	2.6351	4.387	-5.5792	-1.1	1.3207	2.851	-5.8792	0.3	1.536	-0.198301		SHH	1	1
NCGC00250390-01	ISOX	HDAC1	-1.1	1.3207	2.617	-5.8792	-1.1	0.6619	2.023	-6.1792	0.3	0.594	-0.255782		SIRT1	1	1
NCGC00263117-02	Panobinostat	HDAC1	-1.1	0.1049	6.753	-6.9792	-1.1	0.0743	4.97	-7.1292	0.15	1.783	-0.183229		SMO	1	1
NCGC00263136-03	Pracinostat	HDAC1	-1.1	0.1482	4.773	-6.8292	-1.1	0.1049	3.263	-6.9792	0.15	1.51	-0.199888		SPHK1	1	1
NCGC00263153-05	AR-42	HDAC1	-1.1	0.935	4.795	-6.0292	-1.1	0.2957	3.378	-6.5292	0.5	1.417	-0.205562		SYK	1	1
NCGC00263155-01	Belinostat	HDAC1	-1.1	1.9144	4.473	-5.718	-1.1	0.9595	1.897	-6.018	0.3	2.576	-0.13484		TACR1	1	1
NCGC00263182-02	Mocetinostat	HDAC1	-1.1	2.6351	17.21	-5.5792	-1.1	0.5899	3.872	-6.2292	0.65	13.338	0.521861		TACR3	1	1
NCGC00263220-02	Romidepsin	HDAC1	-1.1	0.0187	1.397	-7.7292	-1.1	0.0166	2.574	-7.7792	0.05	-1.177	-0.363849		TGBR1	1	1
NCGC00263617-05	M344	HDAC1	-1.1	0.5258	2.9	-6.2792	-1.1	0.1663	1.756	-6.7792	0.5	1.144	-0.222221		TLR7	1	1
NCGC00345539-02	Dacinostat	HDAC1	-1.1	0.2348	3.065	-6.6292	-1.1	0.1049	0.829	-6.9792	0.35	2.236	-0.155587		TOP1	1	1
NCGC00346486-01	Abexinostat	HDAC1	-1.1	1.3207	2.49	-5.8792	-1.1	0.4686	1.4	-6.3292	0.45	1.09	-0.225516		TP53	1	1
NCGC00346487-01	Quisinostat hydrochloride	HDAC1	-1.1	0.0833	1.394	-7.0792	-1.1	0.0526	1.16	-7.2792	0.2	0.234	-0.27775		TRPV1	1	1
NCGC00346743-01	Givinostat hydrochloride	HDAC1	-1.1	0.7427	3.406	-6.1292	-1.1	0.4686	2.007	-6.3292	0.2	1.399	-0.206661		TRPV4	1	1
NCGC00346891-01	Pyroxamide	HDAC1	-1.1	4.1763	6.438	-5.3792	-1.1	2.3485	3.055	-5.6292	0.25	3.383	-0.0855964		TTK	1	1
NCGC00346948-01	Oxamflatin	HDAC1	-1.1	1.6626	2.138	-5.7792	-1.1	0.7427	0.856	-6.1292	0.35	1.282	-0.2138		WNT1	1	1
NCGC00087387-03	Droxinostat	HDAC6	-2.1	5.8992	11.244	-5.2292	-1.1	5.8992	5.028	-5.2292	0	6.216	0.0872742		XIAP	1	1
NCGC00263606-03	Tubastatin A	HDAC6	-2.1	14.818	8.957	-4.8292	-2.1	11.7704	2.19	-4.9292	0.1	6.767	0.120896
NCGC00345786-01	Compound 7	HDAC6	-2.1	18.6548	16.463	-4.7292	-2.1	16.6261	1.732	-4.7792	0.05	14.731	0.606863
NCGC00345802-01	ACY-1215	HDAC6	-1.1	4.1763	1.766	-5.3792	-1.1	2.9566	1.37	-5.5292	0.15	0.396	-0.267864
NCGC00346840-01	Tubacin	HDAC6	-1.1	8.3328	3.846	-5.0792	-1.1	8.3328	2.025	-5.0792	0	1.821	-0.18091
NCGC00094717-05	6-mercaptopurine	HPRT1	-1.1	1.6626	7.215	-5.7792	-1.1	0.5258	9.439	-6.2792	0.5	-2.224	-0.427738
NCGC00015580-08	Ketotifen	HRH1	-3	33.1734	10.412	-4.4792	-3	29.5659	9.99	-4.5292	0.05	0.422	-0.266278
NCGC00015619-09	Loratadine	HRH1	-2.1	23.485	8.205	-4.6292	-2.1	23.485	4.761	-4.6292	0	3.444	-0.0818742
NCGC00177979-03	Azelastine hydrochloride	HRH1	-1.1	6.619	5.944	-5.1792	-1.1	4.1763	5.059	-5.3792	0.2	0.885	-0.238025
NCGC00178913-04	Tripterin	HSP90AB1	-1.1	0.7427	4.246	-6.1292	-1.1	0.7427	4.996	-6.1292	0	-0.75	-0.337794
NCGC00242478-02	Alvespimycin hydrochloride	HSP90AB1	-1.1	0.6619	1.153	-6.1792	-1.1	0.1663	2.232	-6.7792	0.6	-1.079	-0.357869
NCGC00346438-01	Retaspimycin	HSP90AB1	-2.1	5.8992	3.822	-5.2292	-2.1	3.7221	2.535	-5.4292	0.2	1.287	-0.213495
NCGC00346643-01	Geldanamycin	HSP90AB1	-1.1	1.4818	-0.085	-5.8292	-1.1	0.7427	1.086	-6.1292	0.3	-1.171	-0.363483
NCGC00250378-01	Piboserod hydrochloride	HTR4	-2.1	10.4904	18.942	-4.9792	-2.1	11.7704	11.836	-4.9292	-0.05	7.106	0.141582
NCGC00263234-01	IDH-001	IDH1	-2.1	26.3506	6.247	-4.5792	-2.1	23.485	3.664	-4.6292	0.05	2.583	-0.134413
NCGC00263222-01	CAY10581	IDO1	-1.1	3.7221	3.845	-5.4292	-1.1	2.3485	3.885	-5.6292	0.2	-0.04	-0.294469
NCGC00250375-02	Linsitinib	IGFR1	-2.2	16.6261	18.548	-4.7792	-2.1	16.6261	9.882	-4.7792	0	8.666	0.236774
NCGC00346460-02	BMS-536924	IGFR1	-2.1	16.6261	15.48	-4.7792	-3	26.3506	1.454	-4.5792	-0.2	14.026	0.563843
NCGC00346485-01	ADW-742	IGFR1	-2.1	23.485	-0.745	-4.6292	-2.1	23.485	-0.149	-4.6292	0	-0.596	-0.328396
NCGC00346647-01	GSK-1838705A	IGFR1	-2.1	11.7704	-0.241	-4.9292	-1.1	7.4266	1.245	-5.1292	0.2	-1.486	-0.382705
NCGC00165811-03	IMD-0354	IKBKB	-1.1	1.049	0.051	-5.9792	-1.1	0.4176	0.556	-6.3792	0.4	-0.505	-0.322844
NCGC00167767-03	IKK16	IKBKB	-1.1	6.619	0.618	-5.1792	-1.1	8.3328	1.799	-5.0792	-0.1	-1.181	-0.364093
NCGC00250384-01	PHA-408	IKBKB	-2.1	20.931	0.654	-4.6792	-2.1	23.485	1.317	-4.6292	-0.05	-0.663	-0.332485
NCGC00345782-01	GMX-1778	IKBKB	-1.1	0.0019	4.234	-8.7292	-1.1	0.0033	7.861	-8.4792	-0.25	-3.627	-0.513349
NCGC00250386-02	BX-795	IKBKE	-2.1	18.6548	4.184	-4.7292	-2.1	18.6548	8.813	-4.7292	0	-4.629	-0.574492
NCGC00263093-01	Apilimod	IL2	-2.1	20.931	14.295	-4.6792	-2.1	16.6261	12.53	-4.7792	0.1	1.765	-0.184327
NCGC00188382-04	NCGC00188382-01	ITK	-2.1	1.177	-0.029	-5.9292	-1.1	1.3207	1.045	-5.8792	-0.05	-1.074	-0.357564
NCGC00229512-04	NCGC00229512-01	ITK	-2.1	20.931	0.348	-4.6792	-2.1	14.818	0.679	-4.8292	0.15	-0.331	-0.312226
NCGC00344990-01	NCGC00344990-01	ITK	-1.1	3.7221	16.065	-5.4292	-1.1	4.6859	0.956	-5.3292	-0.1	15.109	0.629928
NCGC00344999-01	NCGC00344999-01	ITK	-1.1	2.6351	0.829	-5.5792	-1.3	0.1321	0.648	-6.8792	1.3	0.181	-0.280984
NCGC00346941-01	ITK inhibitor	ITK	-2.1	23.485	0.754	-4.6292	-2.1	23.485	1.854	-4.6292	0	-1.1	-0.359151
NCGC00244256-02	Lestaurtinib	JAK1	-2.1	1.4818	8.998	-5.8292	-1.1	2.0931	3.612	-5.6792	-0.15	5.386	0.0366273
NCGC00014911-01	Cucurbitacin I	JAK2	-1.1	0.3722	0.14	-6.4292	-1.1	0.1663	1.465	-6.7792	0.35	-1.325	-0.37288
NCGC00249346-02	SB1518	JAK2	-1.1	5.8992	0.915	-5.2292	-1.1	7.4266	2.16	-5.1292	-0.1	-1.245	-0.367999
NCGC00262608-02	TG-101209	JAK2	-2.1	16.6261	0.452	-4.7792	-2.1	16.6261	0.794	-4.7792	0	-0.342	-0.312897
NCGC00263102-01	Degrasyn	JAK2	-1.1	7.4266	2.474	-5.1292	-1.1	3.3173	3.029	-5.4792	0.35	-0.555	-0.325895
NCGC00263202-01	NVP-BSK805	JAK2	-2.1	16.6261	3.655	-4.7792	-2.3	18.6548	4.806	-4.7292	-0.05	-1.151	-0.362263
NCGC00345461-02	Gandotinib	JAK2	-2.1	20.931	18.832	-4.6792	-2.1	13.2066	5.436	-4.8792	0.2	13.396	0.5254
NCGC00345845-01	TG-89	JAK2	-2.1	16.6261	13.645	-4.7792	-2.1	14.818	18.559	-4.8292	0.05	-4.914	-0.591882
NCGC00345846-01	TG-46	JAK2	-2.1	14.818	2.472	-4.8292	-2.1	5.2576	1.544	-5.2792	0.45	0.928	-0.235401
NCGC00263100-01	OSI-632	KDR	-2.1	23.485	1.97	-4.6292	-3	33.1734	2.189	-4.4792	-0.15	-0.219	-0.305392
NCGC00263104-01	Foretinib	KDR	-2.1	14.818	0.563	-4.8292	-2.1	16.6261	2.119	-4.7792	-0.05	-1.556	-0.386976
NCGC00263138-01	Regorafenib	KDR	-2.1	16.6261	3.872	-4.7792	-2.1	14.818	2.837	-4.8292	0.05	1.035	-0.228872
NCGC00263164-01	Cabozantinib	KDR	-2.1	23.485	10.621	-4.6292	-2.1	14.818	3.644	-4.8292	0.2	6.977	0.133711
NCGC00263174-01	Ispinesib	KIF11	-2.4	58.9917	1.44	-4.2292	-1.4	0.0019	2.353	-8.7292	4.5	-0.913	-0.34774
NCGC00346464-01	ARRY-520	KIF11	-3	37.2212	19.052	-4.4292	4	7.4266	9.352	-5.1292	0.7	9.7	0.299869
NCGC00346571-01	SB-743921	KIF11	-2.2	18.6548	1.377	-4.7292	-2.4	13.2066	3.219	-4.8792	0.15	-1.842	-0.404428
NCGC00241097-01	Tandutinib	KIT	-3	33.1734	-0.731	-4.4792	-2.1	23.485	5.748	-4.6292	0.15	-6.479	-0.687379
NCGC00241103-04	Masitinib	KIT	-2.1	23.485	3.361	-4.6292	-3	26.3506	8.258	-4.5792	-0.05	-4.897	-0.590845
NCGC00263206-02	AMG-47a	LCK	-2.1	16.6261	6.886	-4.7792	-2.1	16.6261	3.628	-4.7792	0	3.258	-0.093224
NCGC00346955-01	A-770041	LCK	-1.1	3.7221	8.986	-5.4292	-1.1	4.1763	19.387	-5.3792	-0.05	-10.401	-0.926701
NCGC00346958-01	HMSL10019	LCK	-1.1	4.1763	0.11	-5.3792	-1.1	2.6351	1.861	-5.5792	0.2	-1.751	-0.398875
NCGC00025323-01	Ubenimex	LTA4H	-2.1	26.3506	1.666	-4.5792	-2.1	23.485	3.301	-4.6292	0.05	-1.635	-0.391797
NCGC00183677-03	Hypothemycin	MAP2K1	-1.1	1.8655	5.561	-5.7292	-1.1	4.6859	3.165	-5.3292	-0.4	2.396	-0.145824
NCGC00273985-03	Wyeth Cot inhibitor-2	MAP3K8	-2.1	23.485	0.733	-4.6292	-2.1	20.931	0.632	-4.6792	0.05	0.101	-0.285865
NCGC00346537-01	LY-2228820	MAPK14	-2.1	20.931	11.198	-4.6792	-2.1	23.485	11.944	-4.6292	-0.05	-0.746	-0.33755
NCGC00346804-01	EO-1428	MAPK14	-2.1	16.6261	8.502	-4.7792	-2.1	29.5659	13.95	-4.5292	-0.25	-5.448	-0.624467
NCGC00183912-01	FR-180204	MAPK7	-3	26.3506	8.906	-4.5792	-2.1	23.485	3.494	-4.6292	0.05	5.412	0.0382139
NCGC00242487-01	NCGC00242487	MAPK7	-2.1	14.818	1.202	-4.8292	-2.1	11.7704	1.496	-4.9292	0.1	-0.294	-0.309968
NCGC00263145-01	BI-78D3	MAPK8	-1.1	5.8992	-1.349	-5.2292	-1.1	2.6351	0.578	-5.5792	0.35	-1.927	-0.409615
NCGC00263146-01	SR-3306	MAPK8	-1.1	0.1049	-0.279	-6.9792	-1.1	0.0743	1.629	-7.1292	0.15	-1.908	-0.408455
NCGC00346953-01	JNK Inhibitor V	MAPK8	-2.1	16.6261	18.785	-4.7792	-2.1	16.6261	7.747	-4.7792	0	11.038	0.381514
NCGC00347174-02	VU0482089-2	MCL1	-1.1	5.8992	-0.59	-5.2292	-1.1	1.8655	0.871	-5.7292	0.5	-1.461	-0.381179
NCGC00347281-01	VU0483486-1	MCL1	-3	26.3506	4.71	-4.5792	-3	37.2212	-0.049	-4.4292	-0.15	4.759	-0.00163242
NCGC00347282-01	VU0483487-1	MCL1	-2.1	26.3506	2.206	-4.5792	-3	26.3506	6.041	-4.5792	0	-3.835	-0.526041
NCGC00159570-01	RITA	MDM2	-3	26.3506	7.418	-4.5792	-2.1	26.3506	0.807	-4.5792	0	6.611	0.111377
NCGC00246958-02	NSC-207895	MDM4	-2.1	20.931	11.427	-4.6792	-2.1	20.931	5.685	-4.6792	0	5.742	0.0583506
NCGC00165902-02	SU-MI-2	MET	-2.1	20.931	-0.252	-4.6792	-2.1	18.6548	-0.642	-4.7292	0.05	0.39	-0.26823
NCGC00250400-01	Crizotinib	MET	-2.1	20.931	1.418	-4.6792	-2.1	18.6548	1.948	-4.7292	0.05	-0.53	-0.324369
NCGC00263201-01	AMG-51	MET	-2.1	18.6548	-0.359	-4.7292	-2.1	14.818	0.32	-4.8292	0.1	-0.679	-0.333461
NCGC00346642-01	PHA-665752	MET	-2.1	16.6261	-0.575	-4.7792	-2.1	20.931	-0.565	-4.6792	-0.1	-0.01	-0.292639
NCGC00016246-12	Chlorhexidine	MMP1	-2.1	13.2066	0.706	-4.8792	-2.1	16.6261	1.092	-4.7792	-0.1	-0.386	-0.315582
NCGC00346932-01	SB-3CT	MMP2	-2.1	23.485	2.621	-4.6292	-2.1	18.6548	0.29	-4.7292	0.1	2.331	-0.14979
NCGC00167518-03	Temsirolimus	MTOR	-3	26.3506	1.898	-4.5792	-3	26.3506	3.114	-4.5792	0	-1.216	-0.366229
NCGC00188346-01	PP-242	MTOR	-2.1	1.8655	19.779	-5.7292	-2.1	1.8655	1.364	-5.7292	0	18.415	0.831662
NCGC00250398-01	PF-05212384	MTOR	-2.2	0.5258	18.494	-6.2792	-2.1	1.8655	6.973	-5.7292	-0.55	11.521	0.410987
NCGC00263216-02	Torin-2	MTOR	-1.2	0.0662	13.708	-7.1792	-1.1	0.0372	1.683	-7.4292	0.25	12.025	0.441742
NCGC00346634-01	WAY-600	MTOR	-2.1	18.6548	4.861	-4.7292	-2.1	16.6261	2.574	-4.7792	0.05	2.287	-0.152475
NCGC00346636-01	WYE-687	MTOR	-2.1	14.818	5.997	-4.8292	-2.2	23.485	2.989	-4.6292	-0.2	3.008	-0.108479
NCGC00346654-01	INK-128	MTOR	-2.2	4.1763	13.249	-5.3792	-2.1	0.3317	2.411	-6.4792	1.1	10.838	0.36931
NCGC00015060-19	Azathioprine	NA	-1.1	1.6626	10.453	-5.7792	-1.1	1.4818	12.76	-5.8292	0.05	-2.307	-0.432802
NCGC00015226-11	Mitotane	NA	-2.1	18.6548	16.027	-4.7292	-2.1	18.6548	4.844	-4.7292	0	11.183	0.390362
NCGC00015300-05	Vanoxeamine	NA	-2.1	16.6261	1.142	-4.7792	-2.1	16.6261	2.06	-4.7792	0	-0.918	-0.348045
NCGC00015484-06	GBR-12935	NA	-2.1	26.3506	5.649	-4.5792	-2.1	23.485	10.064	-4.6292	0.05	-4.415	-0.561433
NCGC00015680-14	Melatonin	NA	-1.1	1.3207	8.255	-5.8792	-1.1	2.0931	16.426	-5.6792	-0.2	-8.171	-0.790626
NCGC00015708-17	Maprotiline hydrochloride	NA	-2.1	23.485	7.77	-4.6292	-2.1	26.3506	3.518	-4.5792	-0.05	4.252	-0.0325697
NCGC00015834-11	Primidone	NA	-3	33.1734	5.223	-4.4792	-3	33.1734	4.162	-4.4792	0	1.061	-0.227286
NCGC00015888-04	Reserpine	NA	-2.1	26.3506	4.934	-4.5792	-3	29.5659	3.093	-4.5292	-0.05	1.841	-0.17969
NCGC00016407-11	Sulfamethizole	NA	-2.1	20.931	16.985	-4.6792	-2.1	18.6548	3.39	-4.7292	0.05	13.595	0.537543
NCGC00016855-11	Fenbendazole	NA	-2.1	2.0931	11.093	-5.6792	-1.1	0.5899	5.5	-6.2292	0.55	5.593	0.0492586
NCGC00017112-11	ciclopirox	NA	-2.1	14.818	5.23	-4.8292	-1.1	1.049	10.264	-5.9792	1.15	-5.034	-0.599205
NCGC00017354-06	Spectinomycin hydrochloride	NA	-1.1	2.9566	9.628	-5.5292	-1.1	4.1763	1.046	-5.3792	-0.15	8.582	0.231648
NCGC00018261-05	Perhexiline	NA	-2.1	18.6548	4.445	-4.7292	-2.1	20.931	4.078	-4.6792	-0.05	0.367	-0.269634
NCGC00024246-13	Daunorubicin	NA	-1.1	0.0833	12.893	-7.0792	-1.1	0.1663	4.015	-6.7792	-0.3	8.878	0.24971
NCGC00090774-03	Nitazoxanide	NA	-2.1	19.1437	18.379	-4.718	-1.1	17.0619	10.888	-4.768	0.05	7.491	0.165075
NCGC00090782-07	Viracept	NA	-2.1	23.485	12.843	-4.6292	-2.1	23.485	1.302	-4.6292	0	11.541	0.412208
NCGC00090808-03	Amphotericin B	NA	-1.3	0.3722	0.342	-6.4292	-1.1	0.4686	5.855	-6.3292	-0.1	-5.513	-0.628434
NCGC00091112-08	Methylrosaniline chloride	NA	-2.1	1.3207	-1.971	-5.8792	-1.1	0.2348	-0.946	-6.6292	0.75	-1.025	-0.354574
NCGC00094419-06	TPCK	NA	-2.1	13.2066	0.529	-4.8792	-1.1	9.3495	1.72	-5.0292	0.15	-1.191	-0.364704
NCGC00094792-06	Tioguanine	NA	-1.1	0.7427	0.559	-6.1292	-1.1	0.6619	3.163	-6.1792	0.05	-2.604	-0.450925
NCGC00094994-06	Mefloquine	NA	-2.1	20.931	2.912	-4.6792	-2.1	20.931	4.962	-4.6792	0	-2.05	-0.41712
NCGC00095107-10	Gliclazide	NA	-2.1	26.3506	8.66	-4.5792	-3	33.1734	16.842	-4.4792	-0.1	-8.182	-0.791297
NCGC00095264-05	Chloroxine	NA	-2.1	16.6261	9.224	-4.7792	-1.1	7.4266	11.052	-5.1292	0.35	-1.828	-0.403574
NCGC00096081-03	beta-Carotene	NA	-2.1	23.485	17.562	-4.6292	-2.1	23.485	1.765	-4.6292	0	15.797	0.67191
NCGC00159460-02	Indinavir	NA	4		7.892		-1.1	8.3328	4.039	-5.0792	5.0792	3.853	-0.0569169
NCGC00160514-03	Idebenone	NA	-2.1	16.6261	19.128	-4.7792	-2.1	18.6548	9.881	-4.7292	-0.05	9.247	0.272227
NCGC00162409-03	Bafilomycin A1	NA	-1.1	0.0094	0.977	-8.0292	-1.1	0.0042	1.818	-8.3792	0.35	-0.841	-0.343346
NCGC00165815-05	NSC-724771	NA	-1.1	3.3173	1.433	-5.4792	-1.1	1.3207	2.652	-5.8792	0.4	-1.219	-0.366412
NCGC00167490-02	Lumefantrine	NA	-2.1	16.6261	4.134	-4.7792	-2.1	18.6548	5.944	-4.7292	-0.05	-1.81	-0.402475
NCGC00179578-04	Mometasone furoate	NA	-2.3	10.4904	5.101	-4.9792	-2.1	13.2066	2.826	-4.8792	-0.1	2.275	-0.153207
NCGC00179596-04	Butoconazole nitrate	NA	-2.1	18.6548	5.308	-4.7292	-2.1	20.931	4.107	-4.6792	-0.05	1.201	-0.218743
NCGC00183362-01	Pentagastrin	NA	-1.4	1.3207	17.915	-5.8792	-1.1	1.177	9.917	-5.9292	0.05	7.998	0.196013
NCGC00247785-05	KUC109088N-03	NA	-2.1	16.6261	0.278	-4.7792	-2.1	20.931	1.916	-4.6792	-0.1	-1.638	-0.39198
NCGC00253713-02	Fenticonazole nitrate	NA	-2.1	16.6261	4.358	-4.7792	-2.1	18.6548	3.71	-4.7292	-0.05	0.648	-0.252487
NCGC00263564-02	Levosimendan	NA	-2.1	18.6548	1.177	-4.7292	-2.1	29.5659	3.235	-4.5292	-0.2	-2.058	-0.417608
NCGC00344622-02	SGC0946	NA	-2.1	23.485	-0.745	-4.6292	-3	29.5659	0.65	-4.5292	-0.1	-1.395	-0.377152
NCGC00345813-01	Icaritin	NA	-2.1	16.6261	13.255	-4.7792	-1.1	10.4904	9.73	-4.9792	0.2	3.525	-0.0769315
NCGC00346476-01	Telotristat etiprate	NA	-2.1	23.485	2.237	-4.6292	-2.1	18.6548	2.992	-4.7292	0.1	-0.755	-0.338099
NCGC00346523-01	Azalomycin-B	NA	-1.1	0.7427	2.03	-6.1292	-1.1	0.6619	2.716	-6.1792	0.05	-0.686	-0.333888
NCGC00346524-01	Nanchangmycin	NA	-1.1	1.4818	0.231	-5.8292	-1.1	0.6619	1.142	-6.1792	0.35	-0.911	-0.347618
NCGC00346529-01	Safinamide mesilate	NA	-1.1	5.8992	1.295	-5.2292	-1.1	7.4266	2.398	-5.1292	-0.1	-1.103	-0.359334
NCGC00346531-01	Oligomycin A	NA	-2.1	16.6261	3.663	-4.7792	-2.1	16.6261	4.411	-4.7792	0	-0.748	-0.337672
NCGC00346533-01	Daclatasvir dihydrochloride	NA	1.3	0.0235	3.015	-7.6292	-3	29.5659	3.544	-4.5292	-3.1	-0.529	-0.324308
NCGC00346651-01	Nepicastat hydrochloride	NA	-3	33.1734	9.961	-4.4792	-2.1	23.485	5.694	-4.6292	0.15	4.267	-0.0316544
NCGC00346665-01	Scopine	NA	-2.1	23.485	1.197	-4.6292	-2.1	26.3506	2.632	-4.5792	-0.05	-1.435	-0.379593
NCGC00346682-01	PA-824	NA	-2.1	20.931	9.016	-4.6792	-2.1	26.3506	18.009	-4.5792	-0.1	-8.993	-0.840784
NCGC00346712-01	Verteporfin	NA	-1.1	0.2093	3.003	-6.6792	-1.1	0.7427	3.742	-6.1292	-0.55	-0.739	-0.337122
NCGC00346838-01	Secoisolariciresinol	NA	-1.1	1.177	8.393	-5.9292	-1.1	2.6351	3.283	-5.5792	-0.35	5.11	0.0197857
NCGC00346884-01	Eeyarestatin I	NA	-1.1	9.3495	5.406	-5.0292	-1.1	7.4266	0.911	-5.1292	0.1	4.495	-0.0177418
NCGC00346938-01	E5555	NA	-2.1	16.6261	0.663	-4.7792	-2.1	14.818	1.486	-4.8292	0.05	-0.823	-0.342248
NCGC00346968-01	JS-65-103	NA	-2.1	26.3506	10.887	-4.5792	-1.1	10.4904	4.523	-4.9792	0.4	6.364	0.0963053
NCGC00346971-01	Double JS-K	NA	-2.1	14.818	4.122	-4.8292	-1.1	8.3328	4.561	-5.0792	0.25	-0.439	-0.318816
NCGC00347064-01	KUC107871N-04	NA	-1.1	2.9566	-0.776	-5.5292	-1.1	2.9566	0.771	-5.5292	0	-1.547	-0.386427
NCGC00347066-01	KUC105555N-02	NA	-2.1	16.6261	-1.1	-4.7792	-2.1	20.931	0.469	-4.6792	-0.1	-1.569	-0.387769
NCGC00347286-01	GSK126	NA	-2.1	20.931	-1.004	-4.6792	-3	33.1734	0.167	-4.4792	-0.2	-1.171	-0.363483
NCGC00347958-01	WS3	NA	-1.1	0.4686	-1.451	-6.3292	-1.1	0.4686	-0.057	-6.3292	0	-1.394	-0.377091
NCGC00182868-02	Daporinad	NAMPT	-1.4	0.0059	3.063	-8.2292	4	0.0264	10.646	-7.5792	-0.65	-7.583	-0.754746
NCGC00346595-01	Oridonin	NFE2L3	-1.1	7.4266	0.347	-5.1292	-1.1	2.3485	1.221	-5.6292	0.5	-0.874	-0.34536
NCGC00017159-08	Curcumin	NFKB1	-1.1	10.7653	5.175	-4.968	-1.1	7.6213	2.974	-5.118	0.15	2.201	-0.157723
NCGC00161703-02	NCGC00161703	NFKB1	-1.1	0.0209	0.393	-7.6792	-1.1	0.4176	1.742	-6.3792	-1.3	-1.349	-0.374345
NCGC00163415-03	Parthenolide	NFKB1	-1.1	5.8992	0.465	-5.2292	-1.1	2.6351	1.035	-5.5792	0.35	-0.57	-0.32681
NCGC00186460-01	Bardoxolone methyl	NFKB1	-1.1	0.4686	0.566	-6.3292	-1.1	0.3722	1.741	-6.4292	0.1	-1.175	-0.363727
NCGC00263238-01	Withaferin A	NFKB1	-1.1	0.2635	-0.089	-6.5792	-1.1	0.1049	0.435	-6.9792	0.4	-0.524	-0.324003
NCGC00017394-08	G-Strophanthin	NKAIN1	-1.2	0.0264	18.288	-7.5792	-1.1	0.0235	9.143	-7.6292	0.05	9.145	0.266003
NCGC00346605-01	Sodium Danshensu	NR1I2	-2.1	26.3506	1.472	-4.5792	-2.1	26.3506	3.967	-4.5792	0	-2.495	-0.444274
NCGC00242504-01	Cortivazol	NRC31	-1.1	3.7221	2.15	-5.4292	-1.1	3.3173	2.287	-5.4792	0.05	-0.137	-0.300388
NCGC00242505-01	Deacetyl cortivazol	NRC31	-2.1	18.6548	2.253	-4.7292	-2.1	26.3506	3.113	-4.5792	-0.15	-0.86	-0.344506
NCGC00346936-01	GNF-5837	NTRK1	-2.1	14.818	-0.092	-4.8292	-2.1	11.7704	1.166	-4.9292	0.1	-1.258	-0.368792
NCGC00161418-02	JTC-801	OPRL1	-1.1	4.1763	3.255	-5.3792	-1.1	4.1763	4.168	-5.3792	0	-0.913	-0.34774
NCGC00346896-01	MCOPPB	OPRL1	-2.1	20.931	3.938	-4.6792	-2.1	13.2066	4.666	-4.8792	0.2	-0.728	-0.336451
NCGC00015608-04	Loperamide hydrochloride	OPRM1	-2.1	18.6548	8.237	-4.7292	-2.1	26.3506	3.988	-4.5792	-0.15	4.249	-0.0327528
NCGC00347905-01	AZ 10606120	P2RX7	-2.1	23.485	2.499	-4.6292	-2.1	20.931	3.305	-4.6792	0.05	-0.806	-0.341211
NCGC00343773-01	YW3-56	PADI1	-2.1	16.6261	0.797	-4.7792	-2.1	14.818	1.832	-4.8292	0.05	-1.035	-0.355184
NCGC00186047-02	IPA-3	PAK1	-2.1	11.7704	-0.103	-4.9292	-1.1	9.3495	0.953	-5.0292	0.1	-1.056	-0.356466
NCGC00345784-01	PF-3758309	PAK4	-2.2	2.6351	15.08	-5.5792	-2.1	5.8992	1.259	-5.2292	-0.35	13.821	0.551334
NCGC00025225-02	SCH-79797	PAR1	-1.3	1.6626	0.685	-5.7792	-1.1	1.8655	2.122	-5.7292	-0.05	-1.437	-0.379715
NCGC00018204-11	Vinpocetine	PDE1	-2.1	11.7704	2.019	-4.9292	-2.1	11.7704	3.55	-4.9292	0	-1.531	-0.38545
NCGC00016023-17	Theobromine	PDE4A	-2.1	13.2066	2.942	-4.8792	-2.1	14.818	3.527	-4.8292	-0.05	-0.585	-0.327725
NCGC00016899-04	S-(+)-Rolipram	PDE4A	-3	37.2212	9.348	-4.4292	-3	37.2212	4.058	-4.4292	0	5.29	0.0307694
NCGC00168459-04	NCGC00168459-01	PDE4A	-1.1	9.3495	2.93	-5.0292	-1.1	9.3495	4.669	-5.0292	0	-1.739	-0.398143
NCGC00250085-01	NVP-ABE171	PDE4A	-2.1	23.485	2.554	-4.6292	-3	29.5659	3.786	-4.5292	-0.1	-1.232	-0.367205
NCGC00167533-03	Vardenafil	PDE5A	-1.1	3.3173	0.81	-5.4792	-1.1	2.3485	2.104	-5.6292	0.15	-1.294	-0.370989
NCGC00346449-01	Parogrelil	PDE5A	-1.1	10.4904	1.982	-4.9792	-2.1	10.4904	3.265	-4.9792	0	-1.283	-0.370317
NCGC00346592-01	Icariin	PDE5A	-2.1	16.6261	15.706	-4.7792	-2.1	16.6261	5.465	-4.7792	0	10.241	0.332881
NCGC00346619-01	PP-121	PDGFRA	-2.1	3.3173	10.172	-5.4792	-1.1	1.6626	2.869	-5.7792	0.3	7.303	0.153603
NCGC00346658-01	Crenolanib	PDGFRB	-2.2	14.818	0.705	-4.8292	-1.2	2.6351	0.975	-5.5792	0.75	-0.27	-0.308504
NCGC00346718-01	CP-673451	PDGFRB	-2.1	18.6548	1.177	-4.7292	-2.1	18.6548	0.268	-4.7292	0	0.909	-0.236561
NCGC00346490-01	OSU-03012	PDPK1	-2.1	14.818	-1.452	-4.8292	-2.1	7.4266	-0.961	-5.1292	0.3	-0.491	-0.321989
NCGC00346836-01	GSK-2334470	PDPK1	-2.1	20.931	0.092	-4.6792	-2.1	23.485	0.869	-4.6292	-0.05	-0.777	-0.339441
NCGC00164600-03	Artesunate (AS)	PfATP6	-2.1	14.818	2.125	-4.8292	-1.1	2.3485	4.001	-5.6292	0.8	-1.876	-0.406503
NCGC00346590-01	Artenimol	PfATP6	-2.1	5.8992	1.561	-5.2292	-1.1	2.3485	6.283	-5.6292	0.4	-4.722	-0.580166
NCGC00024196-06	Megestrol acetate	PGR	4		15.899		-2.1	18.6548	8.328	-4.7292	4.7292	7.571	0.169957
NCGC00250408-01	GSK-2126458	PIK3CA	-1.1	0.059	4.645	-7.2292	-1.1	0.0526	0.938	-7.2792	0.05	3.707	-0.0658258
NCGC00263088-01	BAG-956	PIK3CA	-2.1	5.8992	-1.621	-5.2292	-2.1	3.7221	0.066	-5.4292	0.2	-1.687	-0.39497
NCGC00263223-01	CAY10626	PIK3CA	-2.1	6.619	0.819	-5.1792	-2.1	1.049	2.205	-5.9792	0.8	-1.386	-0.376603
NCGC00345447-02	3-Methyladenine	PIK3CA	-1.1	0.5899	5.5	-6.2292	-1.1	0.1321	2.524	-6.8792	0.65	2.976	-0.110432
NCGC00346484-01	ZSTK-474	PIK3CA	-1.1	0.6619	19.546	-6.1792	-1.1	1.177	12.202	-5.9292	-0.25	7.344	0.156105
NCGC00346500-01	PIK-75	PIK3CA	-1.1	0.0209	17.282	-7.6792	-1.1	0.0372	2.198	-7.4292	-0.25	15.084	0.628403
NCGC00346509-01	GSK-615	PIK3CA	-1.1	0.3317	19.769	-6.4792	-1.1	0.6619	3.042	-6.1792	-0.3	16.727	0.728659
NCGC00346614-01	PIK-294	PIK3CA	-1.1	1.6626	15.325	-5.7792	-1.1	1.3207	1.643	-5.8792	0.1	13.682	0.542852
NCGC00346649-01	PKI-402	PIK3CA	-2.1	0.5899	1.429	-6.2292	-2.1	0.2957	3.003	-6.5292	0.3	-1.574	-0.388074
NCGC00346681-01	NVP-BGT226	PIK3CA	-1.2	0.5258	0.026	-6.2792	-1.1	0.0662	1.243	-7.1792	0.9	-1.217	-0.36629
NCGC00346692-01	CUDC-907	PIK3CA	-1.1	0.0037	9.836	-8.4292	-1.2	0.0019	1.108	-8.7292	0.3	8.728	0.240557
NCGC00346683-01	YM-201636	PIKFYVE	-2.1	16.6261	2.421	-4.7792	-2.1	16.6261	3.272	-4.7792	0	-0.851	-0.343957
NCGC00263186-02	SGI-1776	PIM1	-2.1	20.931	1.323	-4.6792	-2.1	23.485	2.582	-4.6292	-0.05	-1.259	-0.368853
NCGC00346935-01	CX-6258	PIM1	-2.1	16.6261	0.975	-4.7792	-2.1	9.3495	1.933	-5.0292	0.25	-0.958	-0.350486
NCGC00253438-01	BI-2536	PLK1	-1.1	0.0526	1.558	-7.2792	-1.1	0.0372	2.577	-7.4292	0.15	-1.019	-0.354208
NCGC00263087-01	Volasertib	PLK1	-1.1	0.3317	1.172	-6.4792	-1.1	0.0662	2.177	-7.1792	0.7	-1.005	-0.353354
NCGC00263112-01	GSK-461364A	PLK1	-1.1	0.0935	-0.554	-7.0292	-1.1	0.059	1.102	-7.2292	0.2	-1.656	-0.393078
NCGC00181336-03	2-Fluoroadenosine	PNP	-1.1	1.3207	16.547	-5.8792	-1.1	0.7427	3.45	-6.1292	0.25	13.097	0.507155
NCGC00160275-01	Resistomycin	POLR2A	-2.1	4.6859	4.298	-5.3292	-1.1	1.177	3.335	-5.9292	0.6	0.963	-0.233266
NCGC00095145-01	Cantharidin	PPP1CA	-1.1	2.6351	17.76	-5.5792	-1.1	2.0931	12.325	-5.6792	0.1	5.435	0.0396173
NCGC00346600-01	Dioscin	PRDX1	-1.1	3.7221	2.798	-5.4292	-1.1	2.0931	4.053	-5.6792	0.25	-1.255	-0.368609
NCGC00162381-03	Thapsigargin	PRKCA	-1.1	1.6626	0.285	-5.7792	-2.1	13.2066	1.193	-4.8792	-0.9	-0.908	-0.347435
NCGC00163451-03	G?-6976	PRKCA	-1.1	0.935	1.655	-6.0292	-1.1	1.049	2.78	-5.9792	-0.05	-1.125	-0.360676
NCGC00163505-03	G?-6983	PRKCA	-2.1	20.931	9.514	-4.6792	-3	29.5659	2.768	-4.5292	-0.15	6.746	0.119615
NCGC00262061-02	Ro-31-8425	PRKCA	-2.1	13.2066	0.895	-4.8792	-1.1	10.4904	1.729	-4.9792	0.1	-0.834	-0.342919
NCGC00346806-01	Endoxifen	PRKCA	-2.1	18.6548	3.088	-4.7292	-2.1	18.6548	3.435	-4.7292	0	-0.347	-0.313202
NCGC00347303-01	Englerin A	PRKCA	-2.1	23.485	1.526	-4.6292	-2.1	29.5659	5.016	-4.5292	-0.1	-3.49	-0.504989
NCGC00263119-01	Ruboxistaurin mesilate	PRKCB	-2.1	13.2066	0.028	-4.8792	-2.1	18.6548	0.853	-4.7292	-0.15	-0.825	-0.34237
NCGC00250377-01	NU-7441	PRKDC	-2.1	18.6548	6.54	-4.7292	-2.1	16.6261	3.979	-4.7792	0.05	2.561	-0.135755
NCGC00250387-02	KU 0060648	PRKDC	-2.1	16.6261	-1.513	-4.7792	-2.1	11.7704	-0.442	-4.9292	0.15	-1.071	-0.357381
NCGC00161679-01	MG-132	PSMD1	-1.1	0.2957	2.215	-6.5292	-1.1	0.2957	2.288	-6.5292	0	-0.073	-0.296483
NCGC00242506-02	Bortezomib	PSMD1	-1.1	0.0094	1.533	-8.0292	-1.1	0.0094	2.405	-8.0292	0	-0.872	-0.345238
NCGC00249611-03	Ixazomib	PSMD1	-1.1	0.0662	-0.188	-7.1792	-1.1	0.0526	0.801	-7.2792	0.1	-0.989	-0.352377
NCGC00249612-01	Ixazomib citrate	PSMD1	-1.1	0.0332	3.064	-7.4792	-1.1	0.0372	2.108	-7.4292	-0.05	0.956	-0.233693
NCGC00249613-03	Carfilzomib	PSMD1	-1.1	0.0059	0.074	-8.2292	-1.1	0.0047	0.797	-8.3292	0.1	-0.723	-0.336146
NCGC00344630-01	Marizomib	PSMD1	-1.1	0.0083	3.182	-8.0792	-1.1	0.0105	2.63	-7.9792	-0.1	0.552	-0.258345
NCGC00345799-01	Oprozomib	PSMD1	-1.1	0.059	0.056	-7.2292	-1.1	0.059	1.439	-7.2292	0	-1.383	-0.376419
NCGC00345815-01	MG-115	PSMD1	-1.1	0.7427	2.33	-6.1292	-1.1	0.7427	2.329	-6.1292	0	0.001	-0.291967
NCGC00346469-01	Delanzomib	PSMD1	-1.1	0.0187	-0.64	-7.7292	-1.1	0.0187	0.345	-7.7292	0	-0.985	-0.352133
NCGC00263018-01	NCGC00263018-01	PTK6	-2.1	18.6548	15.903	-4.7292	-2.1	18.6548	19.89	-4.7292	0	-3.987	-0.535317
NCGC00090752-08	Fenretinide	RARB	-1.1	1.0765	1.05	-5.968	-1.1	1.7062	2.446	-5.768	-0.2	-1.396	-0.377213
NCGC00092284-03	AHPN	RARG	-1.1	0.5258	1.572	-6.2792	-1.1	0.3317	1.396	-6.4792	0.2	0.176	-0.281289
NCGC00187983-01	Thiazovivin	ROCK1	-2.1	16.6261	2.192	-4.7792	-2.1	11.7704	3.019	-4.9292	0.15	-0.827	-0.342492
NCGC00263086-01	BI-D1870	RPS6KA1	-2.1	9.3495	19.253	-5.0292	-2.1	7.4266	6.087	-5.1292	0.1	13.166	0.511366
NCGC00250388-01	KRP 203	S1PR1	-2.1	16.6261	2.608	-4.7792	-2.1	23.485	4.267	-4.6292	-0.15	-1.659	-0.393261
NCGC00347954-01	SAG	SHH	-2.1	20.931	-1.316	-4.6792	-2.1	18.6548	0.299	-4.7292	0.05	-1.615	-0.390576
NCGC00182052-03	SRT1720	SIRT1	-2.1	11.7704	-1.956	-4.9292	-1.1	7.4266	-0.339	-5.1292	0.2	-1.617	-0.390698
NCGC00015264-08	Clomipramine hydrochloride	SLC6A4	-1.1	0.4176	5.153	-6.3792	-1.1	0.4686	3.729	-6.3292	-0.05	1.424	-0.205135
NCGC00164559-04	Duloxetine hydrochloride	SLC6A4	-1.1	4.1763	0.759	-5.3792	-1.1	8.3328	1.942	-5.0792	-0.3	-1.183	-0.364215
NCGC00263084-02	Hh-Ag1.5	SMO	-2.1	23.485	-1.622	-4.6292	-2.1	18.6548	-0.663	-4.7292	0.1	-0.959	-0.350547
NCGC00188399-03	Fingolimod hydrochloride	SPHK1	-2.1	14.818	0.71	-4.8292	-2.1	10.4904	1.854	-4.9792	0.15	-1.144	-0.361836
NCGC00241099-01	Saracatinib	SRC	-2.1	18.6548	4.293	-4.7292	-2.1	20.931	5.374	-4.6792	-0.05	-1.081	-0.357991
NCGC00242490-02	PD-166285	SRC	-2.1	4.6859	0.299	-5.3292	-1.1	0.5899	1.13	-6.2292	0.9	-0.831	-0.342736
NCGC00015735-12	Niclosamide	STAT3	-1.1	1.177	3.373	-5.9292	-1.1	0.8333	4.043	-6.0792	0.15	-0.67	-0.332912
NCGC00017223-03	Ursolic acid	STAT3	-2.1	17.0619	1.657	-4.768	-2.1	42.8575	3.084	-4.368	-0.4	-1.427	-0.379104
NCGC00262642-02	WP-1066	STAT3	-1.1	8.3328	2.548	-5.0792	-1.1	4.6859	5.114	-5.3292	0.25	-2.566	-0.448607
NCGC00262829-02	C-188-9	STAT3	-1.1	8.3328	1.4	-5.0792	-1.1	5.8992	1.863	-5.2292	0.15	-0.463	-0.320281
NCGC00345808-01	BP-1-102	STAT3	-2.1	14.818	0.523	-4.8292	-2.1	18.6548	2.087	-4.7292	-0.1	-1.564	-0.387464
NCGC00345811-01	LLL-12	STAT3	-1.1	0.3317	2.784	-6.4792	-1.1	0.3317	4.094	-6.4792	0	-1.31	-0.371965
NCGC00253909-01	PRT-060318	SYK	-2.1	23.485	0.801	-4.6292	-2.1	26.3506	1.253	-4.5792	-0.05	-0.452	-0.31961
NCGC00181785-01	Aprepitant	TACR1	-2.1	20.931	7.283	-4.6792	-2.1	16.6261	3.406	-4.7792	0.1	3.877	-0.0554524
NCGC00263110-01	Osanetant	TACR3	-2.1	18.6548	2.925	-4.7292	-2.1	20.931	4.307	-4.6792	-0.05	-1.382	-0.376358
NCGC00159337-06	Efavirenz	TERT	-2.1	26.3506	9.209	-4.5792	-2.1	18.6548	6.063	-4.7292	0.15	3.146	-0.100058
NCGC00167740-01	Costunolide	TERT	-3	29.5659	6.651	-4.5292	-2.1	18.6548	3.482	-4.7292	0.2	3.169	-0.0986548
NCGC00165869-03	Dorsomorphin	TGBR1	-2.1	14.818	-1.008	-4.8292	-2.1	18.6548	0.855	-4.7292	-0.1	-1.863	-0.405709
NCGC00263017-01	CPG-52364	TLR7	-2.1	1.4818	4.123	-5.8292	-2.1	1.049	1.409	-5.9792	0.15	2.714	-0.126419
NCGC00015598-03	beta-Lapachone	TOP1	-2.1	16.6261	-0.012	-4.7792	-2.1	20.931	1.158	-4.6792	-0.1	-1.17	-0.363422
NCGC00093976-06	Idarubicin hydrochloride	TOP2A	-1.1	0.6619	1.392	-6.1792	-1.1	0.1482	1.935	-6.8292	0.65	-0.543	-0.325162
NCGC00346513-01	Amonafide	TOP2A	-2.1	18.6548	16.299	-4.7292	-2.1	16.6261	7.274	-4.7792	0.05	9.025	0.25868
NCGC00346881-01	APR-246	TP53	-2.1	16.6261	0.453	-4.7792	-1.1	1.4818	1.703	-5.8292	1.05	-1.25	-0.368304
NCGC00346690-01	705498	TRPV1	-3	26.3506	18.681	-4.5792	-3	33.1734	11.952	-4.4792	-0.1	6.729	0.118578
NCGC00250409-01	GSK-1016790A	TRPV4	-3	26.3506	12.99	-4.5792	-2.1	23.485	1.696	-4.6292	0.05	11.294	0.397136
NCGC00263090-01	AZ-3146	TTK	-2.1	20.931	1.601	-4.6792	-2.1	20.931	9.727	-4.6792	0	-8.126	-0.78788
NCGC00016806-12	Mebendazole	TUBB	-1.1	0.6619	17.949	-6.1792	-1.1	0.3317	10.702	-6.4792	0.3	7.247	0.150186
NCGC00165966-02	Vinorelbine	TUBB	-1.1	0.0209	4.973	-7.6792	-1.1	0.0066	3.269	-8.1792	0.5	1.704	-0.18805
NCGC00263169-01	Plinabulin	TUBB	-2.2	2.148	8.098	-5.668	-1.2	0.1914	9.621	-6.718	1.05	-1.523	-0.384962
NCGC00346731-01	Vinblastine	TUBB	-2.1	20.931	9.829	-4.6792	-2.1	26.3506	4.657	-4.5792	-0.1	5.172	0.023569
NCGC00160391-02	Auranofin	TXNRD1	-1.1	2.9566	3.815	-5.5292	-1.1	1.6626	3.965	-5.7792	0.25	-0.15	-0.301181
NCGC00160391-05	Auranofin	TXNRD1	-1.1	0.8333	-0.607	-6.0792	-1.1	0.2957	-0.076	-6.5292	0.45	-0.531	-0.32443
NCGC00346876-01	PX-12	TXNRD1	-2.1	11.7704	9.676	-4.9292	-1.1	4.6859	4.911	-5.3292	0.4	4.765	-0.0012663
NCGC00161327-05	Calcitriol	VDR	-1.1	8.3328	4.514	-5.0792	-1.1	7.4266	3.941	-5.1292	0.05	0.573	-0.257064
NCGC00182058-03	Doxercalciferol	VDR	-1.1	2.9566	1.857	-5.5292	-1.1	1.6626	2.597	-5.7792	0.25	-0.74	-0.337183
NCGC00242511-02	Seocalcitol	VDR	-2.1	23.485	1.516	-4.6292	-2.1	18.6548	3.111	-4.7292	0.1	-1.595	-0.389356
NCGC00095055-03	Salinomycin	WNT1	-2.1	5.8992	5.366	-5.2292	-1.1	2.3485	5.778	-5.6292	0.4	-0.412	-0.317169
NCGC00346475-01	Birinapant	XIAP	-2.1	4.6859	18.081	-5.3292	-1.3	8.3328	16.23	-5.0792	-0.25	1.851	-0.17908

## Sheet: Pan Active CRC 
Sample ID	Name	Target	Curve Class2 CD47 KO	AC50(uM) CD47 KO	Max Resp CD47 KO	Log AC50 CD47 KO	Curve Class2 WT	AC50(uM) WT	Max Resp WT	Log AC50 WT	Delta LogAC50 CD47KO-WT	Delta Max Resp CD47KO -WT	z-score Delta Max Resp CD47KO-WT		Target	p	padj
NCGC00183285-04	Nilotinib	ABL1	-2.1	10.4904	6.782	-4.9792	-2.1	10.4904	18.545	-4.9792	0	-11.763	-1.00981		HDAC1	1.05866e-10	1.68326e-08
NCGC00241107-03	Bosutinib	ABL1	-2.1	18.6548	3.279	-4.7292	-2.1	16.6261	3.129	-4.7792	0.05	0.15	-0.282875		PSMD1	7.70627e-05	0.00612648
NCGC00346956-01	HMSL10015	ABL1	-2.1	14.818	16.954	-4.8292	-2.1	5.8992	4.211	-5.2292	0.4	12.743	0.485554		TOP1	0.000191045	0.0101254
NCGC00346514-01	Bafetinib	ABL1, LYN	-2.1	18.6548	1.872	-4.7292	-2.1	16.6261	2.665	-4.7792	0.05	-0.793	-0.340417		TUBB	0.000564969	0.0224575
NCGC00178127-04	Ramipril	ACE	-2.1	16.6261	1.443	-4.7792	-2.1	16.6261	2.536	-4.7792	0	-1.093	-0.358724		CDK1	0.00220584	0.0588817
NCGC00181345-01	Temocapril hydrochloride	ACE	-2.1	16.6261	5.808	-4.7792	-1.1	10.4904	1.918	-4.9792	0.2	3.89	-0.0546591		EGFR	0.00222195	0.0588817
NCGC00023673-08	Adenosine	ADORA1	-2.1	20.931	25.452	-4.6792	-2.1	20.931	6.061	-4.6792	0	19.391	0.891218		PIK3CA	0.00269513	0.0589922
NCGC00165880-04	Reversine	ADORA3	-1.1	8.3328	3.459	-5.0792	-2.1	11.7704	10.546	-4.9292	-0.15	-7.087	-0.72448		AKT1	0.0030855	0.0589922
NCGC00016740-19	Prazosin hydrochloride	ADRA1A	-1.1	9.3495	0.186	-5.0292	-1.1	10.4904	1.712	-4.9792	-0.05	-1.526	-0.385145		HDAC6	0.00333918	0.0589922
NCGC00142615-03	Epinephrine	ADRA1A	-2.1	34.0429	4.704	-4.468	-1.1	17.0619	3.103	-4.768	0.3	1.601	-0.194335		TOP2A	0.00794163	0.126272
NCGC00183875-01	Nebivolol	ADRB1	-2.1	20.931	1.823	-4.6792	-2.1	26.3506	1.2	-4.5792	-0.1	0.623	-0.254013		BCL2L1	0.0134984	0.178854
NCGC00263553-02	StemRegenin 1	AHR	-2.1	14.818	-1.728	-4.8292	-2.1	16.6261	-0.116	-4.7792	-0.05	-1.612	-0.390393		PLK1	0.0134984	0.178854
NCGC00162073-05	H-89	AKT1	-2.1	20.931	14.164	-4.6792	-2.1	23.485	6.398	-4.6292	-0.05	7.766	0.181856		JAK2	0.0195486	0.239095
NCGC00165727-02	AKT inhibitor VIII	AKT1	-2.1	18.6548	0.786	-4.7292	-2.1	20.931	2.26	-4.6792	-0.05	-1.474	-0.381972		STAT3	0.0231085	0.262446
NCGC00263147-01	A-674563	AKT1	-2.1	4.1763	10.166	-5.3792	-1.1	3.3173	1.067	-5.4792	0.1	9.099	0.263196		PRKCA	0.0418572	0.403543
NCGC00345795-01	AZD-5363	AKT1	-2.1	7.4266	25.014	-5.1292	-2.1	0.1663	1.231	-6.7792	1.65	23.783	1.15922		DHFR	0.0456841	0.403543
NCGC00345823-01	Akt-I-1,2	AKT1	-2.1	20.931	18.392	-4.6792	-2.1	23.485	4.973	-4.6292	-0.05	13.419	0.526804		ITK	0.0456841	0.403543
NCGC00345840-01	Merck-22-6	AKT1	-1.1	3.3173	-0.939	-5.4792	-1.1	5.2576	0.225	-5.2792	-0.2	-1.164	-0.363056		SRC	0.0456841	0.403543
NCGC00346549-01	AT-7867	AKT1	-2.1	20.931	14.672	-4.6792	-2.1	20.931	5.714	-4.6792	0	8.958	0.254592		CDK4	0.057977	0.438969
NCGC00346621-01	CCT-128930	AKT1	-2.1	7.4266	18.863	-5.1292	-2.1	18.6548	10.681	-4.7292	-0.4	8.182	0.20724		TXNRD1	0.057977	0.438969
NCGC00346714-01	GDC-0068	AKT1	-2.1	0.4176	31.005	-6.3792	-2.1	0.3317	2.029	-6.4792	0.1	28.976	1.4761		VDR	0.057977	0.438969
NCGC00347278-01	A-443654	AKT1	-1.1	0.8333	12.002	-6.0792	-1.1	1.3207	-0.02	-5.8792	-0.2	12.022	0.441558		IKBKB	0.0675225	0.488003
NCGC00345791-01	ASP-3026	ALK	-2.1	37.2212	1.568	-4.4292	-2.1	23.485	1.56	-4.6292	0.2	0.008	-0.29154		CHEK1	0.0939626	0.622502
NCGC00094201-01	Masoprocol	ALOX5	-2.1	14.818	31.706	-4.8292	-2.1	11.7704	3.946	-4.9292	0.1	27.76	1.4019		PDE5A	0.0939626	0.622502
NCGC00185090-03	NCGC00185090-04	APE1	-2.1	18.6548	4.029	-4.7292	-2.1	26.3506	2.758	-4.5792	-0.15	1.271	-0.214471		BRAF	0.138906	0.88344
NCGC00015452-19	Flutamide	AR	-1.1	7.4266	3.159	-5.1292	-1.1	10.4904	3.193	-4.9792	-0.15	-0.034	-0.294103		FGFR	0.155112	0.94857
NCGC00093560-06	Finasteride	AR	-1.1	1.049	1.534	-5.9792	-1.1	2.9566	1.479	-5.5292	-0.45	0.055	-0.288672		KDR	0.224807	1
NCGC00095348-07	Diindolylmethane	AR	-1.1	4.1763	0.848	-5.3792	-1.1	7.4266	2.168	-5.1292	-0.25	-1.32	-0.372575		CDC25	0.240983	1
NCGC00167487-01	(R)-Bicalutamide	AR	-1.1	1.3207	2.45	-5.8792	-1.1	2.6351	2.368	-5.5792	-0.3	0.082	-0.287025		CDC42	0.240983	1
NCGC00167977-03	Bicalutamide	AR	-1.1	1.049	2.038	-5.9792	-1.1	1.3207	2.678	-5.8792	-0.1	-0.64	-0.331081		COX10	0.240983	1
NCGC00346725-01	ARN-509	AR	-1.1	1.4818	0.351	-5.8292	-1.1	2.9566	0.828	-5.5292	-0.3	-0.477	-0.321135		DDR1	0.240983	1
NCGC00229735-03	KU-60019	ATM	-2.1	16.6261	30.579	-4.7792	-2.1	16.6261	14.91	-4.7792	0	15.669	0.6641		EHMT2	0.240983	1
NCGC00159574-02	ZM 44739	AURKA	-2.1	20.931	2.608	-4.6792	-2.1	20.931	2.785	-4.6792	0	-0.177	-0.302829		NRC31	0.240983	1
NCGC00263178-01	ENMD-981693	AURKA	-2.1	42.8575	3.318	-4.368	-2.1	15.2064	3.017	-4.818	0.45	0.301	-0.273661		LCK	0.246476	1
NCGC00263204-01	CYC-116	AURKA	-2.1	9.3495	19.471	-5.0292	-2.1	16.6261	9.906	-4.7792	-0.25	9.565	0.291631		PDPK1	0.246476	1
NCGC00346525-01	Aurora A Inhibitor I	AURKA	-1.1	5.2576	0.029	-5.2792	-1.1	3.3173	1.265	-5.4792	0.2	-1.236	-0.367449		SYK	0.246476	1
NCGC00346542-01	Hesperadin	AURKA	-2.1	18.6548	5.655	-4.7292	-2.1	18.6548	1.227	-4.7292	0	4.428	-0.0218302		NFKB1	0.283589	1
NCGC00346676-01	CCT-137690	AURKA	-1.1	8.3328	0.028	-5.0792	-1.1	8.3328	0.919	-5.0792	0	-0.891	-0.346397		ABL1	0.298934	1
NCGC00346648-01	GSK-1070916A	AURKB	-2.1	16.6261	0.52	-4.7792	-2.1	13.2066	0.626	-4.8792	0.1	-0.106	-0.298496		FLT1	0.337194	1
NCGC00345789-01	ABT-199	BCL2	-2.1	11.7704	13.048	-4.9292	-1.1	6.619	2.921	-5.1792	0.25	10.127	0.325925		BRD4	0.423988	1
NCGC00015225-03	Chelerythrine chloride	BCL2L1	-1.1	7.4266	1.037	-5.1292	-1.1	5.2576	1.971	-5.2792	0.15	-0.934	-0.349021		CERS1	0.423988	1
NCGC00016423-14	(-)-Gossypol	BCL2L1	-1.1	6.619	1.771	-5.1792	-1.1	6.619	3.058	-5.1792	0	-1.287	-0.370562		CNR1	0.423988	1
NCGC00188344-05	Navitoclax	BCL2L1	-2.1	5.8992	0.827	-5.2292	-1.1	0.2348	1.628	-6.6292	1.4	-0.801	-0.340906		OPRL1	0.423988	1
NCGC00253562-02	ABT-737	BCL2L1	-2.1	14.818	29.852	-4.8292	-1.1	1.8655	1.054	-5.7292	0.9	28.798	1.46524		PDGFRB	0.423988	1
NCGC00263166-01	Obatoclax	BCL2L1	-1.1	1.4818	2.689	-5.8292	-1.1	0.3722	1.106	-6.4292	0.6	1.583	-0.195433		SLC6A4	0.423988	1
NCGC00242514-01	Sepantronium bromide	BIRC5	-1.1	0.0833	1.144	-7.0792	-1.1	0.0526	1.105	-7.2792	0.2	0.039	-0.289649		SPHK1	0.423988	1
NCGC00025109-01	ZM-336372	BRAF	-1.1	0.4176	6.608	-6.3792	-1.1	2.6351	26.629	-5.5792	-0.8	-20.021	-1.51372		AR	0.445409	1
NCGC00242249-02	SB-590885	BRAF	-2.1	20.931	-0.837	-4.6792	-2.1	18.6548	-0.523	-4.7292	0.05	-0.314	-0.311189		HSP90AB1	0.446852	1
NCGC00249391-01	NVP-BHG712	BRAF	-2.1	11.7704	2.252	-4.9292	-1.1	9.3495	0.648	-5.0292	0.1	1.604	-0.194152		AURKA	0.498056	1
NCGC00250399-01	Vemurafenib	BRAF	-2.1	18.6548	6.748	-4.7292	-2.1	20.931	2.075	-4.6792	-0.05	4.673	-0.00688017		MET	0.50622	1
NCGC00250407-01	CHIR-265	BRAF	-2.1	5.2576	26.75	-5.2792	-2.1	4.1763	19.87	-5.3792	0.1	6.88	0.127792		MAPK8	0.532619	1
NCGC00346577-01	RAF-265 derivative	BRAF	-2.1	14.818	23.15	-4.8292	-2.1	16.6261	6.199	-4.7792	-0.05	16.951	0.742328		BTK	0.562943	1
NCGC00250412-01	JQ1	BRD4	-2.1	4.6859	6.937	-5.3292	-2.1	3.7221	2.182	-5.4292	0.1	4.755	-0.0018765		CAMKK2	0.562943	1
NCGC00344588-01	I-BET151	BRD4	-2.1	20.931	6.882	-4.6792	-2.1	5.8992	0.957	-5.2292	0.55	5.925	0.0695173		MDM2	0.562943	1
NCGC00187912-03	PCI-32765	BTK	-2.1	20.931	17.724	-4.6792	-2.1	18.6548	1.828	-4.7292	0.05	15.896	0.677951		PIM1	0.562943	1
NCGC00346962-01	HMSL10077	BTK	-1.1	4.6859	0.463	-5.3292	-1.1	2.6351	1.245	-5.5792	0.25	-0.782	-0.339746		SIRT1	0.562943	1
NCGC00015233-04	Calmidazolium chloride	CAMKK2	-2.1	13.2066	-0.156	-4.8792	-2.1	14.818	0.552	-4.8292	-0.05	-0.708	-0.335231		ERBB2	0.668431	1
NCGC00250376-01	KN-93	CAMKK2	-2.1	20.931	4.296	-4.6792	-2.1	20.931	6.461	-4.6792	0	-2.165	-0.424137		GSK3B	0.678087	1
NCGC00163489-04	Shikonin	CCR5	-1.1	1.3207	1.016	-5.8792	-1.1	1.049	2.763	-5.9792	0.1	-1.747	-0.398631		MTOR	0.747688	1
NCGC00016258-07	Menadione	CDC25	-2.1	14.818	-0.719	-4.8292	-2.1	14.818	0.851	-4.8292	0	-1.57	-0.38783		ACE	0.748501	1
NCGC00092289-01	DA-3003-1	CDC25	-1.1	2.6351	-0.912	-5.5792	-1.1	3.7221	-0.179	-5.4292	-0.15	-0.733	-0.336756		PRKDC	0.748501	1
NCGC00263209-02	ML 141	CDC42	-2.1	16.6261	12.475	-4.7792	-2.1	18.6548	13.002	-4.7292	-0.05	-0.527	-0.324186		P2RX7	0.809267	1
NCGC00347941-01	CASIN	CDC42	-2.1	23.485	0.021	-4.6292	-2.1	16.6261	1.637	-4.7792	0.15	-1.616	-0.390637		PfATP6	0.809267	1
NCGC00025219-04	Purvalanol A	CDK1	-2.1	16.6261	15.32	-4.7792	-2.1	20.931	1.815	-4.6792	-0.1	13.505	0.532052		JAK1	0.855375	1
NCGC00250401-01	Flavopiridol???	CDK1	-1.1	0.059	37.554	-7.2292	-1.1	0.0935	2.486	-7.0292	-0.2	35.068	1.84783		IGFR1	0.890355	1
NCGC00263091-01	AT-7519	CDK1	-1.1	0.3317	27.655	-6.4792	-1.1	0.6619	1.678	-6.1792	-0.3	25.977	1.2931		HRH1	0.937012	1
NCGC00345809-01	RGB-286147	CDK1	-1.1	0.059	39.37	-7.2292	-1.1	0.1482	1.775	-6.8292	-0.4	37.595	2.00203		TGBR1	0.937012	1
NCGC00345852-01	BS-194	CDK1	-1.1	0.2348	43.598	-6.6292	-1.1	0.2635	1.928	-6.5792	-0.05	41.67	2.25069		PDE4A	0.963839	1
NCGC00346617-01	AZD-5438	CDK1	-1.1	2.0931	18.763	-5.6792	-1.1	3.7221	0.801	-5.4292	-0.25	17.962	0.804019		ADRA1A	0.979254	1
NCGC00346632-01	R-547	CDK1	-1.1	0.5258	36.61	-6.2792	-1.1	2.3485	3.1	-5.6292	-0.65	33.51	1.75276		MAPK14	0.984291	1
NCGC00346673-01	Milciclib	CDK1	-1.1	0.7427	34.643	-6.1292	-1.1	1.8655	3.772	-5.7292	-0.4	30.871	1.59173		ADORA1	1	1
NCGC00346827-01	7-Hydroxystaurosporine	CDK1	-1.1	0.6619	0.797	-6.1792	-1.1	0.4686	1.869	-6.3292	0.15	-1.072	-0.357442		ADORA3	1	1
NCGC00346940-01	CGP-60474	CDK1	-1.1	0.1177	12.54	-6.9292	-1.1	0.1663	2.599	-6.7792	-0.15	9.941	0.314575		ADRB1	1	1
NCGC00346950-01	NU-6102	CDK1	-2.1	16.6261	20.131	-4.7792	-2.1	23.485	24.893	-4.6292	-0.15	-4.762	-0.582607		AHR	1	1
NCGC00263191-01	PHA-690509	CDK2	-1.1	1.4818	17.268	-5.8292	-1.1	3.3173	2.502	-5.4792	-0.35	14.766	0.608998		ALK	1	1
NCGC00263129-01	PD-0332991	CDK4	-2.1	16.6261	1.831	-4.7792	-2.1	14.818	0.52	-4.8292	0.05	1.311	-0.212031		ALOX5	1	1
NCGC00346951-01	Fascaplysin	CDK4	-1.1	1.8655	0.455	-5.7292	-1.1	1.3207	0.801	-5.8792	0.15	-0.346	-0.313141		APE1	1	1
NCGC00346952-01	Cdk4/6 Inhibitor IV	CDK4	-2.1	26.3506	4.473	-4.5792	-2.1	23.485	2.62	-4.6292	0.05	1.853	-0.178958		ATM	1	1
NCGC00346553-01	BS-181	CDK7	-2.1	16.6261	1.171	-4.7792	-2.1	18.6548	1.187	-4.7292	-0.05	-0.016	-0.293005		AURKB	1	1
NCGC00346943-01	GSK-923295	CENPE	-2.1	4.6859	2.839	-5.3292	-1.1	0.2635	4.95	-6.5792	1.25	-2.111	-0.420842		BCL2	1	1
NCGC00263217-01	NVP231	CERS1	-1.1	4.1763	13.445	-5.3792	-1.1	2.6351	6.085	-5.5792	0.2	7.36	0.157082		BIRC5	1	1
NCGC00263224-01	D-NMAPPD	CERS1	-2.1	18.6548	1.676	-4.7292	-2.1	18.6548	0.669	-4.7292	0	1.007	-0.230581		CCR5	1	1
NCGC00346703-01	Torcetrapib	CETP	-2.1	13.2066	42.694	-4.8792	-1.1	10.4904	32.033	-4.9792	0.1	10.661	0.35851		CDK2	1	1
NCGC00346550-01	Lumacaftor	CFTR	-1.1	0.0833	34.976	-7.0792	-1.1	0.0743	4.41	-7.1292	0.05	30.566	1.57312		CDK7	1	1
NCGC00263132-02	PF-477736	CHEK1	-1.1	0.3317	14.494	-6.4792	-1.1	0.5258	2.213	-6.2792	-0.2	12.281	0.457363		CENPE	1	1
NCGC00343768-01	Rabusertib	CHEK1	-1.1	4.1763	21.324	-5.3792	-1.1	2.6351	2.668	-5.5792	0.2	18.656	0.846368		CETP	1	1
NCGC00346626-01	CHIR-124	CHEK1	-2.1	1.4818	0.474	-5.8292	-1.1	0.1177	1.158	-6.9292	1.1	-0.684	-0.333766		CFTR	1	1
NCGC00346954-01	TCS-2312	CHEK1	-1.1	2.6351	7.707	-5.5792	-1.1	0.935	2.936	-6.0292	0.45	4.771	-0.000900178		CHEK2	1	1
NCGC00346436-01	CCT-241533	CHEK2	-2.1	23.485	2.722	-4.6292	-2.1	23.485	4.008	-4.6292	0	-1.286	-0.370501		CSNK1A2	1	1
NCGC00016210-06	WIN-55212-2	CNR1	-2.1	20.931	8.149	-4.6792	-2.1	23.485	2.394	-4.6292	-0.05	5.755	0.0591439		CTSB	1	1
NCGC00164572-01	Rimonabant	CNR1	-2.1	16.6261	12.325	-4.7792	-2.1	18.6548	5.356	-4.7292	-0.05	6.969	0.133223		CXCR1	1	1
NCGC00250406-01	Tipifarnib	COX10	-2.1	5.8992	3.808	-5.2292	-2.1	5.8992	0.015	-5.2292	0	3.793	-0.0605781		CYP19A1	1	1
NCGC00346707-01	Lonafarnib	COX10	-2.1	16.6261	6.165	-4.7792	-2.1	16.6261	-0.402	-4.7792	0	6.567	0.108692		CYSLTR1	1	1
NCGC00263192-02	Silmitasertib	CSNK1A2	-2.1	8.3328	11.506	-5.0792	-1.1	5.8992	5.359	-5.2292	0.15	6.147	0.0830638		DDC	1	1
NCGC00163431-03	CA-074 Me	CTSB	-2.1	14.818	8.068	-4.8292	-2.1	9.3495	2.608	-5.0292	0.2	5.46	0.0411429		DNMT1	1	1
NCGC00263128-01	PD-0220245	CXCR1	-1.1	9.3495	2.639	-5.0292	-1.1	8.3328	4.675	-5.0792	0.05	-2.036	-0.416266		ELA2	1	1
NCGC00018294-06	Miconazole nitrate	CYP19A1	-2.1	18.6548	8.864	-4.7292	-2.1	20.931	4.956	-4.6792	-0.05	3.908	-0.0535607		ERN1	1	1
NCGC00164547-06	Zafirlukast	CYSLTR1	-2.1	16.6261	0.763	-4.7792	-2.1	18.6548	2.379	-4.7292	-0.05	-1.616	-0.390637		ESR1	1	1
NCGC00015163-08	Benserazide	DDC	-2.1	14.818	2.259	-4.8292	-2.1	23.485	2.778	-4.6292	-0.2	-0.519	-0.323698		EWSR1	1	1
NCGC00346961-01	HMSL10076	DDR1	-2.1	16.6261	3.867	-4.7792	-2.1	18.6548	1.806	-4.7292	-0.05	2.061	-0.166265		FLT3	1	1
NCGC00347217-01	PRP003-013	DDR1	-2.1	11.7704	2.646	-4.9292	-1.1	8.3328	2.532	-5.0792	0.15	0.114	-0.285072		GCK	1	1
NCGC00015038-08	Aminopterin	DHFR	-1.1	0.0332	16.153	-7.4792	-1.1	0.0418	20.95	-7.3792	-0.1	-4.797	-0.584743		GRM1	1	1
NCGC00016256-16	Pyrimethamine	DHFR	-1.1	2.0931	8.807	-5.6792	-1.1	1.6626	16.367	-5.7792	0.1	-7.56	-0.753342		HPRT1	1	1
NCGC00161419-03	Trimetrexate	DHFR	-1.1	0.935	0.503	-6.0292	-1.1	1.049	4.613	-5.9792	-0.05	-4.11	-0.542822		HTR1B	1	1
NCGC00242596-01	Pralatrexate	DHFR	-1.1	0.0372	8.967	-7.4292	-1.1	0.0469	18.713	-7.3292	-0.1	-9.746	-0.886733		HTR4	1	1
NCGC00090851-09	5-Azacitidine	DNMT1	-1.1	1.8655	20.191	-5.7292	-1.1	2.6351	3.895	-5.5792	-0.15	16.296	0.702359		IDH1	1	1
NCGC00159455-04	Gefitinib	EGFR	-2.1	27.0412	1.52	-4.568	-2.1	34.0429	2.495	-4.468	-0.1	-0.975	-0.351523		IDO1	1	1
NCGC00167507-03	Lapatinib	EGFR	-1.1	0.8333	0.625	-6.0792	-1.1	1.049	1.775	-5.9792	-0.1	-1.15	-0.362202		IKBKE	1	1
NCGC00167513-03	Vandetanib	EGFR	-2.1	26.3506	-0.138	-4.5792	-2.1	20.931	0.94	-4.6792	0.1	-1.078	-0.357808		IL2	1	1
NCGC00182713-01	Canertinib	EGFR	-2.1	16.6261	0.296	-4.7792	-2.1	14.818	0.978	-4.8292	0.05	-0.682	-0.333644		IMPDH1	1	1
NCGC00185000-03	Afatinib	EGFR	-2.1	8.3328	2.357	-5.0792	-1.1	4.6859	3.468	-5.3292	0.25	-1.111	-0.359822		LTA4H	1	1
NCGC00241101-02	Neratinib	EGFR	-1.1	0.4686	33.071	-6.3292	-2.1	2.9566	21.055	-5.5292	-0.8	12.016	0.441192		LYN	1	1
NCGC00263103-01	Pelitinib	EGFR	-1.1	0.4176	2.087	-6.3792	-1.1	0.4176	2.597	-6.3792	0	-0.51	-0.323149		MAP2K1	1	1
NCGC00263177-01	CUDC-101	EGFR	-1.1	0.0526	4.513	-7.2792	-1.1	0.0418	1.945	-7.3792	0.1	2.568	-0.135328		MAP3K8	1	1
NCGC00263185-01	Dacomitinib	EGFR	-2.1	16.6261	-0.219	-4.7792	-2.1	13.2066	0.849	-4.8792	0.1	-1.068	-0.357198		MAPK7	1	1
NCGC00263195-01	AV-412	EGFR	-1.1	2.3485	0.22	-5.6292	-1.1	1.3207	0.397	-5.8792	0.25	-0.177	-0.302829		MCL1	1	1
NCGC00346496-01	WZ-3146	EGFR	-2.1	13.2066	1.232	-4.8792	-2.1	4.1763	0.173	-5.3792	0.5	1.059	-0.227408		MDM4	1	1
NCGC00346578-01	OSI-420	EGFR	-1.1	3.7221	29.331	-5.4292	-1.1	4.6859	12.145	-5.3292	-0.1	17.186	0.756668		MMP1	1	1
NCGC00346724-01	Varlitinib tosylate	EGFR	-2.1	16.6261	13.313	-4.7792	-2.1	16.6261	12.304	-4.7792	0	1.009	-0.230459		MMP2	1	1
NCGC00347284-01	XL-647	EGFR	-2.1	11.7704	0.682	-4.9292	-1.1	3.7221	1.135	-5.4292	0.5	-0.453	-0.319671		MPL	1	1
NCGC00185850-02	BIX-01294	EHMT2	-1.1	5.2576	1.846	-5.2792	-1.1	3.7221	2.216	-5.4292	0.15	-0.37	-0.314606		NFE2L3	1	1
NCGC00189220-05	UNC-0638	EHMT2	-1.1	6.619	1.041	-5.1792	-1.1	4.1763	1.56	-5.3792	0.2	-0.519	-0.323698		NR1I2	1	1
NCGC00167751-03	SSR-69071	ELA2	-1.1	11.7704	15.368	-4.9292	-2.1	16.6261	5.068	-4.7792	-0.15	10.3	0.336481		NTRK1	1	1
NCGC00346478-02	AST-1306	ERBB2	-1.1	1.049	-0.67	-5.9792	-1.1	0.2635	0.302	-6.5792	0.6	-0.972	-0.35134		OPRM1	1	1
NCGC00346672-01	ARRY-380	ERBB2	-2.1	18.6548	0.073	-4.7292	-2.1	16.6261	1.132	-4.7792	0.05	-1.059	-0.356649		PADI1	1	1
NCGC00263141-01	STF-083010	ERN1	-1.1	3.7221	34.106	-5.4292	-2.1	14.818	14.896	-4.8292	-0.6	19.21	0.880173		PAK1	1	1
NCGC00015889-10	Raloxifene hydrochloride	ESR1	-2.1	16.6261	1.358	-4.7792	-2.1	20.931	2.145	-4.6792	-0.1	-0.787	-0.340051		PDE1	1	1
NCGC00346886-01	YK-4-279	EWSR1	-1.1	0.935	38.318	-6.0292	-1.1	0.1663	14.615	-6.7792	0.75	23.703	1.15434		PDGFRA	1	1
NCGC00165863-02	PD-173074	FGFR	-2.1	14.818	-0.452	-4.8292	-2.1	10.4904	0.514	-4.9792	0.15	-0.966	-0.350974		PIK3CD	1	1
NCGC00249685-02	Dovitinib	FGFR	-2.1	14.818	1.123	-4.8292	-2.1	10.4904	1.566	-4.9792	0.15	-0.443	-0.31906		PIKFYVE	1	1
NCGC00263152-02	Ponatinib	FGFR	-1.1	4.1763	0.597	-5.3792	-1.1	3.3173	1.915	-5.4792	0.1	-1.318	-0.372453		PIM3	1	1
NCGC00346713-01	AZD-4547	FGFR	-2.1	18.6548	2.217	-4.7292	-2.1	26.3506	3.039	-4.5792	-0.15	-0.822	-0.342187		PNP	1	1
NCGC00164631-03	Sunitinib malate	FLT1	-1.1	6.7925	0.656	-5.168	-1.1	7.6213	1.31	-5.118	-0.05	-0.654	-0.331936		POLR2A	1	1
NCGC00167488-03	Sorafenib	FLT1	-2.1	20.931	1.026	-4.6792	-2.1	14.818	1.996	-4.8292	0.15	-0.97	-0.351218		PPP1CA	1	1
NCGC00241108-03	Axitinib	FLT1	-2.1	29.5659	26.242	-4.5292	-2.1	18.6548	25.143	-4.7292	0.2	1.099	-0.224967		PRDX1	1	1
NCGC00249390-01	Tivozanib	FLT1	-2.1	26.3506	30.389	-4.5792	-2.1	13.2066	8.955	-4.8792	0.3	21.434	1.01588		PRKCB	1	1
NCGC00263097-01	Cediranib	FLT1	-2.1	20.931	2.569	-4.6792	-2.1	26.3506	3.033	-4.5792	-0.1	-0.464	-0.320342		PTK2	1	1
NCGC00345821-01	AG-13958	FLT1	-2.1	14.818	3.599	-4.8292	-2.1	13.2066	4.882	-4.8792	0.05	-1.283	-0.370317		PTK6	1	1
NCGC00346964-01	HMSL10084	FLT3	-1.1	0.4686	24.556	-6.3292	-1.1	0.4686	2.486	-6.3292	0	22.07	1.05469		RARB	1	1
NCGC00346628-01	LY-2608204	GCK	-2.1	13.2066	2.362	-4.8792	-2.1	14.818	2.451	-4.8292	-0.05	-0.089	-0.297459		RARG	1	1
NCGC00092375-02	JNJ-16259685	GRM1	-2.1	23.485	0.24	-4.6292	-2.1	20.931	1.513	-4.6792	0.05	-1.273	-0.369707		ROCK1	1	1
NCGC00094112-06	BIO	GSK3B	-2.1	13.2066	0.901	-4.8792	-2.1	8.3328	1.161	-5.0792	0.2	-0.26	-0.307894		RPS6KA1	1	1
NCGC00346638-01	TWS-119	GSK3B	-1.1	5.2576	41.471	-5.2792	-1.1	2.9566	15.256	-5.5292	0.25	26.215	1.30762		S1PR1	1	1
NCGC00346883-01	6-Bromoindirubin-3'-acetoxime	GSK3B	-2.1	10.4904	8.792	-4.9792	-1.1	5.8992	2.914	-5.2292	0.25	5.878	0.0666494		SCL5A2	1	1
NCGC00162453-10	Trichostatin A	HDAC1	-1.1	0.6619	0.791	-6.1792	-1.1	0.2093	-0.99	-6.6792	0.5	1.781	-0.183351		SHH	1	1
NCGC00165833-04	Entinostat	HDAC1	-1.1	2.6351	21.338	-5.5792	-1.1	0.8333	2.566	-6.0792	0.5	18.772	0.853446		SLC6A9	1	1
NCGC00168085-02	Vorinostat	HDAC1	-1.1	2.6351	4.387	-5.5792	-1.1	1.3207	2.851	-5.8792	0.3	1.536	-0.198301		SMO	1	1
NCGC00250390-01	ISOX	HDAC1	-1.1	1.3207	2.617	-5.8792	-1.1	0.6619	2.023	-6.1792	0.3	0.594	-0.255782		TACR1	1	1
NCGC00263117-02	Panobinostat	HDAC1	-1.1	0.1049	6.753	-6.9792	-1.1	0.0743	4.97	-7.1292	0.15	1.783	-0.183229		TACR3	1	1
NCGC00263136-03	Pracinostat	HDAC1	-1.1	0.1482	4.773	-6.8292	-1.1	0.1049	3.263	-6.9792	0.15	1.51	-0.199888		TBXA2R	1	1
NCGC00263153-05	AR-42	HDAC1	-1.1	0.935	4.795	-6.0292	-1.1	0.2957	3.378	-6.5292	0.5	1.417	-0.205562		TEK	1	1
NCGC00263155-01	Belinostat	HDAC1	-1.1	1.9144	4.473	-5.718	-1.1	0.9595	1.897	-6.018	0.3	2.576	-0.13484		TERT	1	1
NCGC00263182-02	Mocetinostat	HDAC1	-1.1	2.6351	17.21	-5.5792	-1.1	0.5899	3.872	-6.2292	0.65	13.338	0.521861		TLR7	1	1
NCGC00263220-02	Romidepsin	HDAC1	-1.1	0.0187	1.397	-7.7292	-1.1	0.0166	2.574	-7.7792	0.05	-1.177	-0.363849		TNF	1	1
NCGC00263617-05	M344	HDAC1	-1.1	0.5258	2.9	-6.2792	-1.1	0.1663	1.756	-6.7792	0.5	1.144	-0.222221		TP53	1	1
NCGC00345539-02	Dacinostat	HDAC1	-1.1	0.2348	3.065	-6.6292	-1.1	0.1049	0.829	-6.9792	0.35	2.236	-0.155587		TRPV4	1	1
NCGC00346486-01	Abexinostat	HDAC1	-1.1	1.3207	2.49	-5.8792	-1.1	0.4686	1.4	-6.3292	0.45	1.09	-0.225516		TTK	1	1
NCGC00346487-01	Quisinostat hydrochloride	HDAC1	-1.1	0.0833	1.394	-7.0792	-1.1	0.0526	1.16	-7.2792	0.2	0.234	-0.27775		WNT1	1	1
NCGC00346743-01	Givinostat hydrochloride	HDAC1	-1.1	0.7427	3.406	-6.1292	-1.1	0.4686	2.007	-6.3292	0.2	1.399	-0.206661		XIAP	1	1
NCGC00346891-01	Pyroxamide	HDAC1	-1.1	4.1763	6.438	-5.3792	-1.1	2.3485	3.055	-5.6292	0.25	3.383	-0.0855964
NCGC00346948-01	Oxamflatin	HDAC1	-1.1	1.6626	2.138	-5.7792	-1.1	0.7427	0.856	-6.1292	0.35	1.282	-0.2138
NCGC00087387-03	Droxinostat	HDAC6	-2.1	5.8992	11.244	-5.2292	-1.1	5.8992	5.028	-5.2292	0	6.216	0.0872742
NCGC00263606-03	Tubastatin A	HDAC6	-2.1	14.818	8.957	-4.8292	-2.1	11.7704	2.19	-4.9292	0.1	6.767	0.120896
NCGC00345786-01	Compound 7	HDAC6	-2.1	18.6548	16.463	-4.7292	-2.1	16.6261	1.732	-4.7792	0.05	14.731	0.606863
NCGC00345802-01	ACY-1215	HDAC6	-1.1	4.1763	1.766	-5.3792	-1.1	2.9566	1.37	-5.5292	0.15	0.396	-0.267864
NCGC00346840-01	Tubacin	HDAC6	-1.1	8.3328	3.846	-5.0792	-1.1	8.3328	2.025	-5.0792	0	1.821	-0.18091
NCGC00094717-05	6-mercaptopurine	HPRT1	-1.1	1.6626	7.215	-5.7792	-1.1	0.5258	9.439	-6.2792	0.5	-2.224	-0.427738
NCGC00015619-09	Loratadine	HRH1	-2.1	23.485	8.205	-4.6292	-2.1	23.485	4.761	-4.6292	0	3.444	-0.0818742
NCGC00177979-03	Azelastine hydrochloride	HRH1	-1.1	6.619	5.944	-5.1792	-1.1	4.1763	5.059	-5.3792	0.2	0.885	-0.238025
NCGC00163424-03	Tanespimycin	HSP90AB1	-1.1	1.4818	21.702	-5.8292	-1.1	1.4818	17.923	-5.8292	0	3.779	-0.0614324
NCGC00178913-04	Tripterin	HSP90AB1	-1.1	0.7427	4.246	-6.1292	-1.1	0.7427	4.996	-6.1292	0	-0.75	-0.337794
NCGC00242478-02	Alvespimycin hydrochloride	HSP90AB1	-1.1	0.6619	1.153	-6.1792	-1.1	0.1663	2.232	-6.7792	0.6	-1.079	-0.357869
NCGC00346438-01	Retaspimycin	HSP90AB1	-2.1	5.8992	3.822	-5.2292	-2.1	3.7221	2.535	-5.4292	0.2	1.287	-0.213495
NCGC00346643-01	Geldanamycin	HSP90AB1	-1.1	1.4818	-0.085	-5.8292	-1.1	0.7427	1.086	-6.1292	0.3	-1.171	-0.363483
NCGC00181786-03	Naratriptan hydrochloride	HTR1B	-1.1	1.049	22.742	-5.9792	-1.1	1.4818	14.414	-5.8292	-0.15	8.328	0.216149
NCGC00250378-01	Piboserod hydrochloride	HTR4	-2.1	10.4904	18.942	-4.9792	-2.1	11.7704	11.836	-4.9292	-0.05	7.106	0.141582
NCGC00263234-01	IDH-001	IDH1	-2.1	26.3506	6.247	-4.5792	-2.1	23.485	3.664	-4.6292	0.05	2.583	-0.134413
NCGC00263222-01	CAY10581	IDO1	-1.1	3.7221	3.845	-5.4292	-1.1	2.3485	3.885	-5.6292	0.2	-0.04	-0.294469
NCGC00346485-01	ADW-742	IGFR1	-2.1	23.485	-0.745	-4.6292	-2.1	23.485	-0.149	-4.6292	0	-0.596	-0.328396
NCGC00346647-01	GSK-1838705A	IGFR1	-2.1	11.7704	-0.241	-4.9292	-1.1	7.4266	1.245	-5.1292	0.2	-1.486	-0.382705
NCGC00165761-02	BMS-345541	IKBKB	-2.1	14.818	23.272	-4.8292	-2.1	16.6261	1.923	-4.7792	-0.05	21.349	1.0107
NCGC00165811-03	IMD-0354	IKBKB	-1.1	1.049	0.051	-5.9792	-1.1	0.4176	0.556	-6.3792	0.4	-0.505	-0.322844
NCGC00167767-03	IKK16	IKBKB	-1.1	6.619	0.618	-5.1792	-1.1	8.3328	1.799	-5.0792	-0.1	-1.181	-0.364093
NCGC00167773-03	TPCA-1	IKBKB	-1.1	1.4818	31.06	-5.8292	-1.1	2.3485	18.961	-5.6292	-0.2	12.099	0.446257
NCGC00250384-01	PHA-408	IKBKB	-2.1	20.931	0.654	-4.6792	-2.1	23.485	1.317	-4.6292	-0.05	-0.663	-0.332485
NCGC00345782-01	GMX-1778	IKBKB	-1.1	0.0019	4.234	-8.7292	-1.1	0.0033	7.861	-8.4792	-0.25	-3.627	-0.513349
NCGC00250386-02	BX-795	IKBKE	-2.1	18.6548	4.184	-4.7292	-2.1	18.6548	8.813	-4.7292	0	-4.629	-0.574492
NCGC00263093-01	Apilimod	IL2	-2.1	20.931	14.295	-4.6792	-2.1	16.6261	12.53	-4.7792	0.1	1.765	-0.184327
NCGC00345803-01	AVN-944	IMPDH1	-2.1	8.3328	34.737	-5.0792	-1.1	0.3722	29.318	-6.4292	1.35	5.419	0.038641
NCGC00188382-04	NCGC00188382-01	ITK	-2.1	1.177	-0.029	-5.9292	-1.1	1.3207	1.045	-5.8792	-0.05	-1.074	-0.357564
NCGC00229512-04	NCGC00229512-01	ITK	-2.1	20.931	0.348	-4.6792	-2.1	14.818	0.679	-4.8292	0.15	-0.331	-0.312226
NCGC00344990-01	NCGC00344990-01	ITK	-1.1	3.7221	16.065	-5.4292	-1.1	4.6859	0.956	-5.3292	-0.1	15.109	0.629928
NCGC00346941-01	ITK inhibitor	ITK	-2.1	23.485	0.754	-4.6292	-2.1	23.485	1.854	-4.6292	0	-1.1	-0.359151
NCGC00244256-02	Lestaurtinib	JAK1	-2.1	1.4818	8.998	-5.8292	-1.1	2.0931	3.612	-5.6792	-0.15	5.386	0.0366273
NCGC00345855-01	GPLG-0634	JAK1	-2.1	16.6261	29.048	-4.7792	-2.1	16.6261	30.92	-4.7792	0	-1.872	-0.406258
NCGC00014911-01	Cucurbitacin I	JAK2	-1.1	0.3722	0.14	-6.4292	-1.1	0.1663	1.465	-6.7792	0.35	-1.325	-0.37288
NCGC00249346-02	SB1518	JAK2	-1.1	5.8992	0.915	-5.2292	-1.1	7.4266	2.16	-5.1292	-0.1	-1.245	-0.367999
NCGC00262608-02	TG-101209	JAK2	-2.1	16.6261	0.452	-4.7792	-2.1	16.6261	0.794	-4.7792	0	-0.342	-0.312897
NCGC00263102-01	Degrasyn	JAK2	-1.1	7.4266	2.474	-5.1292	-1.1	3.3173	3.029	-5.4792	0.35	-0.555	-0.325895
NCGC00345461-02	Gandotinib	JAK2	-2.1	20.931	18.832	-4.6792	-2.1	13.2066	5.436	-4.8792	0.2	13.396	0.5254
NCGC00345845-01	TG-89	JAK2	-2.1	16.6261	13.645	-4.7792	-2.1	14.818	18.559	-4.8292	0.05	-4.914	-0.591882
NCGC00345846-01	TG-46	JAK2	-2.1	14.818	2.472	-4.8292	-2.1	5.2576	1.544	-5.2792	0.45	0.928	-0.235401
NCGC00346581-01	AZ-960	JAK2	-2.1	14.818	26.954	-4.8292	-1.1	0.8333	25.874	-6.0792	1.25	1.08	-0.226126
NCGC00263104-01	Foretinib	KDR	-2.1	14.818	0.563	-4.8292	-2.1	16.6261	2.119	-4.7792	-0.05	-1.556	-0.386976
NCGC00263138-01	Regorafenib	KDR	-2.1	16.6261	3.872	-4.7792	-2.1	14.818	2.837	-4.8292	0.05	1.035	-0.228872
NCGC00263164-01	Cabozantinib	KDR	-2.1	23.485	10.621	-4.6292	-2.1	14.818	3.644	-4.8292	0.2	6.977	0.133711
NCGC00263176-01	BMS-794833	KDR	-2.1	23.485	28.874	-4.6292	-2.1	23.485	9.184	-4.6292	0	19.69	0.909463
NCGC00263206-02	AMG-47a	LCK	-2.1	16.6261	6.886	-4.7792	-2.1	16.6261	3.628	-4.7792	0	3.258	-0.093224
NCGC00346955-01	A-770041	LCK	-1.1	3.7221	8.986	-5.4292	-1.1	4.1763	19.387	-5.3792	-0.05	-10.401	-0.926701
NCGC00346958-01	HMSL10019	LCK	-1.1	4.1763	0.11	-5.3792	-1.1	2.6351	1.861	-5.5792	0.2	-1.751	-0.398875
NCGC00025323-01	Ubenimex	LTA4H	-2.1	26.3506	1.666	-4.5792	-2.1	23.485	3.301	-4.6292	0.05	-1.635	-0.391797
NCGC00183677-03	Hypothemycin	MAP2K1	-1.1	1.8655	5.561	-5.7292	-1.1	4.6859	3.165	-5.3292	-0.4	2.396	-0.145824
NCGC00273985-03	Wyeth Cot inhibitor-2	MAP3K8	-2.1	23.485	0.733	-4.6292	-2.1	20.931	0.632	-4.6792	0.05	0.101	-0.285865
NCGC00346537-01	LY-2228820	MAPK14	-2.1	20.931	11.198	-4.6792	-2.1	23.485	11.944	-4.6292	-0.05	-0.746	-0.33755
NCGC00346804-01	EO-1428	MAPK14	-2.1	16.6261	8.502	-4.7792	-2.1	29.5659	13.95	-4.5292	-0.25	-5.448	-0.624467
NCGC00242487-01	NCGC00242487	MAPK7	-2.1	14.818	1.202	-4.8292	-2.1	11.7704	1.496	-4.9292	0.1	-0.294	-0.309968
NCGC00263145-01	BI-78D3	MAPK8	-1.1	5.8992	-1.349	-5.2292	-1.1	2.6351	0.578	-5.5792	0.35	-1.927	-0.409615
NCGC00263146-01	SR-3306	MAPK8	-1.1	0.1049	-0.279	-6.9792	-1.1	0.0743	1.629	-7.1292	0.15	-1.908	-0.408455
NCGC00346953-01	JNK Inhibitor V	MAPK8	-2.1	16.6261	18.785	-4.7792	-2.1	16.6261	7.747	-4.7792	0	11.038	0.381514
NCGC00347174-02	VU0482089-2	MCL1	-1.1	5.8992	-0.59	-5.2292	-1.1	1.8655	0.871	-5.7292	0.5	-1.461	-0.381179
NCGC00014873-04	HLI-373989	MDM2	-2.1	14.818	27.558	-4.8292	-2.1	16.6261	1.53	-4.7792	-0.05	26.028	1.29621
NCGC00263171-01	Serdemetan	MDM2	-2.1	20.931	22.184	-4.6792	-2.1	20.931	2.779	-4.6792	0	19.405	0.892072
NCGC00246958-02	NSC-207895	MDM4	-2.1	20.931	11.427	-4.6792	-2.1	20.931	5.685	-4.6792	0	5.742	0.0583506
NCGC00165902-02	SU-MI-2	MET	-2.1	20.931	-0.252	-4.6792	-2.1	18.6548	-0.642	-4.7292	0.05	0.39	-0.26823
NCGC00250400-01	Crizotinib	MET	-2.1	20.931	1.418	-4.6792	-2.1	18.6548	1.948	-4.7292	0.05	-0.53	-0.324369
NCGC00263201-01	AMG-51	MET	-2.1	18.6548	-0.359	-4.7292	-2.1	14.818	0.32	-4.8292	0.1	-0.679	-0.333461
NCGC00345793-01	EMD-1214063	MET	-2.1	16.6261	39.443	-4.7792	-2.1	20.931	4.948	-4.6792	-0.1	34.495	1.81287
NCGC00346642-01	PHA-665752	MET	-2.1	16.6261	-0.575	-4.7792	-2.1	20.931	-0.565	-4.6792	-0.1	-0.01	-0.292639
NCGC00016246-12	Chlorhexidine	MMP1	-2.1	13.2066	0.706	-4.8792	-2.1	16.6261	1.092	-4.7792	-0.1	-0.386	-0.315582
NCGC00346932-01	SB-3CT	MMP2	-2.1	23.485	2.621	-4.6292	-2.1	18.6548	0.29	-4.7292	0.1	2.331	-0.14979
NCGC00274067-01	Eltrombopag olamine	MPL	-2.1	14.818	33.444	-4.8292	-2.1	9.3495	9.025	-5.0292	0.2	24.419	1.19803
NCGC00187481-04	BEZ235	MTOR	-1.1	0.1049	36.486	-6.9792	-1.1	0.4686	17.377	-6.3292	-0.65	19.109	0.87401
NCGC00188346-01	PP-242	MTOR	-2.1	1.8655	19.779	-5.7292	-2.1	1.8655	1.364	-5.7292	0	18.415	0.831662
NCGC00250395-01	OSI-027	MTOR	-2.1	1.4818	39.363	-5.8292	-2.1	4.6859	19.943	-5.3292	-0.5	19.42	0.892987
NCGC00346634-01	WAY-600	MTOR	-2.1	18.6548	4.861	-4.7292	-2.1	16.6261	2.574	-4.7792	0.05	2.287	-0.152475
NCGC00346635-01	WYE-125132	MTOR	-2.1	2.6351	23.319	-5.5792	-2.1	6.619	8.513	-5.1792	-0.4	14.806	0.611439
NCGC00015060-19	Azathioprine	NA	-1.1	1.6626	10.453	-5.7792	-1.1	1.4818	12.76	-5.8292	0.05	-2.307	-0.432802
NCGC00015226-11	Mitotane	NA	-2.1	18.6548	16.027	-4.7292	-2.1	18.6548	4.844	-4.7292	0	11.183	0.390362
NCGC00015300-05	Vanoxeamine	NA	-2.1	16.6261	1.142	-4.7792	-2.1	16.6261	2.06	-4.7792	0	-0.918	-0.348045
NCGC00015484-06	GBR-12935	NA	-2.1	26.3506	5.649	-4.5792	-2.1	23.485	10.064	-4.6292	0.05	-4.415	-0.561433
NCGC00015680-14	Melatonin	NA	-1.1	1.3207	8.255	-5.8792	-1.1	2.0931	16.426	-5.6792	-0.2	-8.171	-0.790626
NCGC00015708-17	Maprotiline hydrochloride	NA	-2.1	23.485	7.77	-4.6292	-2.1	26.3506	3.518	-4.5792	-0.05	4.252	-0.0325697
NCGC00016407-11	Sulfamethizole	NA	-2.1	20.931	16.985	-4.6792	-2.1	18.6548	3.39	-4.7292	0.05	13.595	0.537543
NCGC00016855-11	Fenbendazole	NA	-2.1	2.0931	11.093	-5.6792	-1.1	0.5899	5.5	-6.2292	0.55	5.593	0.0492586
NCGC00017112-11	ciclopirox	NA	-2.1	14.818	5.23	-4.8292	-1.1	1.049	10.264	-5.9792	1.15	-5.034	-0.599205
NCGC00017354-06	Spectinomycin hydrochloride	NA	-1.1	2.9566	9.628	-5.5292	-1.1	4.1763	1.046	-5.3792	-0.15	8.582	0.231648
NCGC00018261-05	Perhexiline	NA	-2.1	18.6548	4.445	-4.7292	-2.1	20.931	4.078	-4.6792	-0.05	0.367	-0.269634
NCGC00024246-13	Daunorubicin	NA	-1.1	0.0833	12.893	-7.0792	-1.1	0.1663	4.015	-6.7792	-0.3	8.878	0.24971
NCGC00090757-05	Melphalan	NA	-2.1	23.485	20.406	-4.6292	-1.1	1.4818	3.759	-5.8292	1.2	16.647	0.723778
NCGC00090774-03	Nitazoxanide	NA	-2.1	19.1437	18.379	-4.718	-1.1	17.0619	10.888	-4.768	0.05	7.491	0.165075
NCGC00090782-07	Viracept	NA	-2.1	23.485	12.843	-4.6292	-2.1	23.485	1.302	-4.6292	0	11.541	0.412208
NCGC00090797-11	Digoxin	NA	-1.1	0.1521	23.541	-6.818	-1.1	0.1355	7.852	-6.868	0.05	15.689	0.66532
NCGC00091112-08	Methylrosaniline chloride	NA	-2.1	1.3207	-1.971	-5.8792	-1.1	0.2348	-0.946	-6.6292	0.75	-1.025	-0.354574
NCGC00091861-06	Dacarbazine	NA	-1.1	4.1763	55.176	-5.3792	-1.1	3.7221	42.351	-5.4292	0.05	12.825	0.490558
NCGC00094419-06	TPCK	NA	-2.1	13.2066	0.529	-4.8792	-1.1	9.3495	1.72	-5.0292	0.15	-1.191	-0.364704
NCGC00094792-06	Tioguanine	NA	-1.1	0.7427	0.559	-6.1292	-1.1	0.6619	3.163	-6.1792	0.05	-2.604	-0.450925
NCGC00094994-06	Mefloquine	NA	-2.1	20.931	2.912	-4.6792	-2.1	20.931	4.962	-4.6792	0	-2.05	-0.41712
NCGC00095112-04	Avobenzone	NA	-1.1	5.8992	20.586	-5.2292	-1.1	5.8992	9.161	-5.2292	0	11.425	0.405129
NCGC00095264-05	Chloroxine	NA	-2.1	16.6261	9.224	-4.7792	-1.1	7.4266	11.052	-5.1292	0.35	-1.828	-0.403574
NCGC00096081-03	beta-Carotene	NA	-2.1	23.485	17.562	-4.6292	-2.1	23.485	1.765	-4.6292	0	15.797	0.67191
NCGC00160514-03	Idebenone	NA	-2.1	16.6261	19.128	-4.7792	-2.1	18.6548	9.881	-4.7292	-0.05	9.247	0.272227
NCGC00162409-03	Bafilomycin A1	NA	-1.1	0.0094	0.977	-8.0292	-1.1	0.0042	1.818	-8.3792	0.35	-0.841	-0.343346
NCGC00164634-01	Balsalazide disodium	NA	-2.1	26.3506	9.181	-4.5792	-2.1	23.485	25.381	-4.6292	0.05	-16.2	-1.28056
NCGC00165815-05	NSC-724771	NA	-1.1	3.3173	1.433	-5.4792	-1.1	1.3207	2.652	-5.8792	0.4	-1.219	-0.366412
NCGC00167430-03	Tioconazole	NA	-2.1	18.6548	25.821	-4.7292	-2.1	23.485	19.307	-4.6292	-0.1	6.514	0.105458
NCGC00167490-02	Lumefantrine	NA	-2.1	16.6261	4.134	-4.7792	-2.1	18.6548	5.944	-4.7292	-0.05	-1.81	-0.402475
NCGC00167496-02	Methylene blue	NA	-2.1	5.2576	21.698	-5.2792	-1.1	2.6351	9.601	-5.5792	0.3	12.097	0.446135
NCGC00179250-04	Halofantrine	NA	-2.1	16.6261	10.465	-4.7792	-1.2	0.4686	60.477	-6.3292	1.55	-50.012	-3.34378
NCGC00179511-04	Racecadotril	NA	-1.1	2.6351	24.771	-5.5792	-2.1	4.6859	14.295	-5.3292	-0.25	10.476	0.347221
NCGC00179596-04	Butoconazole nitrate	NA	-2.1	18.6548	5.308	-4.7292	-2.1	20.931	4.107	-4.6792	-0.05	1.201	-0.218743
NCGC00246966-03	Flubendazole	NA	-1.1	0.3722	25.101	-6.4292	-1.1	0.2957	13.827	-6.5292	0.1	11.274	0.395915
NCGC00247785-05	KUC109088N-03	NA	-2.1	16.6261	0.278	-4.7792	-2.1	20.931	1.916	-4.6792	-0.1	-1.638	-0.39198
NCGC00253713-02	Fenticonazole nitrate	NA	-2.1	16.6261	4.358	-4.7792	-2.1	18.6548	3.71	-4.7292	-0.05	0.648	-0.252487
NCGC00263564-02	Levosimendan	NA	-2.1	18.6548	1.177	-4.7292	-2.1	29.5659	3.235	-4.5292	-0.2	-2.058	-0.417608
NCGC00345813-01	Icaritin	NA	-2.1	16.6261	13.255	-4.7792	-1.1	10.4904	9.73	-4.9792	0.2	3.525	-0.0769315
NCGC00346476-01	Telotristat etiprate	NA	-2.1	23.485	2.237	-4.6292	-2.1	18.6548	2.992	-4.7292	0.1	-0.755	-0.338099
NCGC00346523-01	Azalomycin-B	NA	-1.1	0.7427	2.03	-6.1292	-1.1	0.6619	2.716	-6.1792	0.05	-0.686	-0.333888
NCGC00346524-01	Nanchangmycin	NA	-1.1	1.4818	0.231	-5.8292	-1.1	0.6619	1.142	-6.1792	0.35	-0.911	-0.347618
NCGC00346529-01	Safinamide mesilate	NA	-1.1	5.8992	1.295	-5.2292	-1.1	7.4266	2.398	-5.1292	-0.1	-1.103	-0.359334
NCGC00346531-01	Oligomycin A	NA	-2.1	16.6261	3.663	-4.7792	-2.1	16.6261	4.411	-4.7792	0	-0.748	-0.337672
NCGC00346589-01	Cinchonidine	NA	-2.1	20.931	22.697	-4.6792	-1.3	3.3173	8.53	-5.4792	0.8	14.167	0.572447
NCGC00346665-01	Scopine	NA	-2.1	23.485	1.197	-4.6292	-2.1	26.3506	2.632	-4.5792	-0.05	-1.435	-0.379593
NCGC00346682-01	PA-824	NA	-2.1	20.931	9.016	-4.6792	-2.1	26.3506	18.009	-4.5792	-0.1	-8.993	-0.840784
NCGC00346712-01	Verteporfin	NA	-1.1	0.2093	3.003	-6.6792	-1.1	0.7427	3.742	-6.1292	-0.55	-0.739	-0.337122
NCGC00346720-01	Entecavir	NA	-2.1	4.6859	63.062	-5.3292	-1.1	0.3317	7.89	-6.4792	1.15	55.172	3.07459
NCGC00346832-01	Terameprocol	NA	-1.1	0.4686	30.413	-6.3292	-1.1	0.3722	10.098	-6.4292	0.1	20.315	0.9476
NCGC00346838-01	Secoisolariciresinol	NA	-1.1	1.177	8.393	-5.9292	-1.1	2.6351	3.283	-5.5792	-0.35	5.11	0.0197857
NCGC00346884-01	Eeyarestatin I	NA	-1.1	9.3495	5.406	-5.0292	-1.1	7.4266	0.911	-5.1292	0.1	4.495	-0.0177418
NCGC00346930-01	Picoplatin	NA	-2.1	37.2212	53.529	-4.4292	-2.1	18.6548	11.955	-4.7292	0.3	41.574	2.24483
NCGC00346938-01	E5555	NA	-2.1	16.6261	0.663	-4.7792	-2.1	14.818	1.486	-4.8292	0.05	-0.823	-0.342248
NCGC00346968-01	JS-65-103	NA	-2.1	26.3506	10.887	-4.5792	-1.1	10.4904	4.523	-4.9792	0.4	6.364	0.0963053
NCGC00346969-01	JS-59-4	NA	-1.1	0.8333	21.249	-6.0792	-1.1	0.4686	4.608	-6.3292	0.25	16.641	0.723412
NCGC00346971-01	Double JS-K	NA	-2.1	14.818	4.122	-4.8292	-1.1	8.3328	4.561	-5.0792	0.25	-0.439	-0.318816
NCGC00347064-01	KUC107871N-04	NA	-1.1	2.9566	-0.776	-5.5292	-1.1	2.9566	0.771	-5.5292	0	-1.547	-0.386427
NCGC00347066-01	KUC105555N-02	NA	-2.1	16.6261	-1.1	-4.7792	-2.1	20.931	0.469	-4.6792	-0.1	-1.569	-0.387769
NCGC00347940-01	Bioymifi	NA	-1.1	2.0931	48.515	-5.6792	-1.1	2.6351	10.488	-5.5792	-0.1	38.027	2.02839
NCGC00347953-01	OAC1	NA	-2.1	10.4904	9.048	-4.9792	-2.1	11.7704	22.559	-4.9292	-0.05	-13.511	-1.11647
NCGC00347958-01	WS3	NA	-1.1	0.4686	-1.451	-6.3292	-1.1	0.4686	-0.057	-6.3292	0	-1.394	-0.377091
NCGC00346595-01	Oridonin	NFE2L3	-1.1	7.4266	0.347	-5.1292	-1.1	2.3485	1.221	-5.6292	0.5	-0.874	-0.34536
NCGC00017159-08	Curcumin	NFKB1	-1.1	10.7653	5.175	-4.968	-1.1	7.6213	2.974	-5.118	0.15	2.201	-0.157723
NCGC00161703-02	NCGC00161703	NFKB1	-1.1	0.0209	0.393	-7.6792	-1.1	0.4176	1.742	-6.3792	-1.3	-1.349	-0.374345
NCGC00163415-03	Parthenolide	NFKB1	-1.1	5.8992	0.465	-5.2292	-1.1	2.6351	1.035	-5.5792	0.35	-0.57	-0.32681
NCGC00186460-01	Bardoxolone methyl	NFKB1	-1.1	0.4686	0.566	-6.3292	-1.1	0.3722	1.741	-6.4292	0.1	-1.175	-0.363727
NCGC00263238-01	Withaferin A	NFKB1	-1.1	0.2635	-0.089	-6.5792	-1.1	0.1049	0.435	-6.9792	0.4	-0.524	-0.324003
NCGC00346747-02	NCGC00346747-02	NFKB1	-2.1	18.6548	21.943	-4.7292	-2.1	20.931	27.871	-4.6792	-0.05	-5.928	-0.653757
NCGC00346605-01	Sodium Danshensu	NR1I2	-2.1	26.3506	1.472	-4.5792	-2.1	26.3506	3.967	-4.5792	0	-2.495	-0.444274
NCGC00242504-01	Cortivazol	NRC31	-1.1	3.7221	2.15	-5.4292	-1.1	3.3173	2.287	-5.4792	0.05	-0.137	-0.300388
NCGC00242505-01	Deacetyl cortivazol	NRC31	-2.1	18.6548	2.253	-4.7292	-2.1	26.3506	3.113	-4.5792	-0.15	-0.86	-0.344506
NCGC00346936-01	GNF-5837	NTRK1	-2.1	14.818	-0.092	-4.8292	-2.1	11.7704	1.166	-4.9292	0.1	-1.258	-0.368792
NCGC00161418-02	JTC-801	OPRL1	-1.1	4.1763	3.255	-5.3792	-1.1	4.1763	4.168	-5.3792	0	-0.913	-0.34774
NCGC00346896-01	MCOPPB	OPRL1	-2.1	20.931	3.938	-4.6792	-2.1	13.2066	4.666	-4.8792	0.2	-0.728	-0.336451
NCGC00015608-04	Loperamide hydrochloride	OPRM1	-2.1	18.6548	8.237	-4.7292	-2.1	26.3506	3.988	-4.5792	-0.15	4.249	-0.0327528
NCGC00347904-01	AZ 11645373	P2RX7	-1.1	3.3173	35.262	-5.4792	-2.1	20.931	3.025	-4.6792	-0.8	32.237	1.67509
NCGC00347905-01	AZ 10606120	P2RX7	-2.1	23.485	2.499	-4.6292	-2.1	20.931	3.305	-4.6792	0.05	-0.806	-0.341211
NCGC00343773-01	YW3-56	PADI1	-2.1	16.6261	0.797	-4.7792	-2.1	14.818	1.832	-4.8292	0.05	-1.035	-0.355184
NCGC00186047-02	IPA-3	PAK1	-2.1	11.7704	-0.103	-4.9292	-1.1	9.3495	0.953	-5.0292	0.1	-1.056	-0.356466
NCGC00018204-11	Vinpocetine	PDE1	-2.1	11.7704	2.019	-4.9292	-2.1	11.7704	3.55	-4.9292	0	-1.531	-0.38545
NCGC00016023-17	Theobromine	PDE4A	-2.1	13.2066	2.942	-4.8792	-2.1	14.818	3.527	-4.8292	-0.05	-0.585	-0.327725
NCGC00168459-04	NCGC00168459-01	PDE4A	-1.1	9.3495	2.93	-5.0292	-1.1	9.3495	4.669	-5.0292	0	-1.739	-0.398143
NCGC00015385-12	Dipyridamole	PDE5A	-2.1	23.485	18.861	-4.6292	-2.1	20.931	25.837	-4.6792	0.05	-6.976	-0.717706
NCGC00167533-03	Vardenafil	PDE5A	-1.1	3.3173	0.81	-5.4792	-1.1	2.3485	2.104	-5.6292	0.15	-1.294	-0.370989
NCGC00346449-01	Parogrelil	PDE5A	-1.1	10.4904	1.982	-4.9792	-2.1	10.4904	3.265	-4.9792	0	-1.283	-0.370317
NCGC00346592-01	Icariin	PDE5A	-2.1	16.6261	15.706	-4.7792	-2.1	16.6261	5.465	-4.7792	0	10.241	0.332881
NCGC00346619-01	PP-121	PDGFRA	-2.1	3.3173	10.172	-5.4792	-1.1	1.6626	2.869	-5.7792	0.3	7.303	0.153603
NCGC00263159-01	OSI-930	PDGFRB	-2.1	20.931	25.795	-4.6792	-2.1	16.6261	12.813	-4.7792	0.1	12.982	0.500138
NCGC00346718-01	CP-673451	PDGFRB	-2.1	18.6548	1.177	-4.7292	-2.1	18.6548	0.268	-4.7292	0	0.909	-0.236561
NCGC00346490-01	OSU-03012	PDPK1	-2.1	14.818	-1.452	-4.8292	-2.1	7.4266	-0.961	-5.1292	0.3	-0.491	-0.321989
NCGC00346687-01	BX-912	PDPK1	-2.1	18.6548	32.052	-4.7292	-2.1	14.818	18.998	-4.8292	0.1	13.054	0.504531
NCGC00346836-01	GSK-2334470	PDPK1	-2.1	20.931	0.092	-4.6792	-2.1	23.485	0.869	-4.6292	-0.05	-0.777	-0.339441
NCGC00164600-03	Artesunate (AS)	PfATP6	-2.1	14.818	2.125	-4.8292	-1.1	2.3485	4.001	-5.6292	0.8	-1.876	-0.406503
NCGC00346590-01	Artenimol	PfATP6	-2.1	5.8992	1.561	-5.2292	-1.1	2.3485	6.283	-5.6292	0.4	-4.722	-0.580166
NCGC00163485-03	Wortmannin	PIK3CA	-2.1	5.8992	26.434	-5.2292	-2.1	13.2066	9.434	-4.8792	-0.35	17	0.745318
NCGC00238454-02	PIK-90	PIK3CA	-2.1	16.6261	28.047	-4.7792	-2.1	23.485	10.212	-4.6292	-0.15	17.835	0.79627
NCGC00250408-01	GSK-2126458	PIK3CA	-1.1	0.059	4.645	-7.2292	-1.1	0.0526	0.938	-7.2792	0.05	3.707	-0.0658258
NCGC00262604-01	BKM-120	PIK3CA	-1.1	0.4686	25.278	-6.3292	-1.1	0.4686	5.499	-6.3292	0	19.779	0.914893
NCGC00263088-01	BAG-956	PIK3CA	-2.1	5.8992	-1.621	-5.2292	-2.1	3.7221	0.066	-5.4292	0.2	-1.687	-0.39497
NCGC00263223-01	CAY10626	PIK3CA	-2.1	6.619	0.819	-5.1792	-2.1	1.049	2.205	-5.9792	0.8	-1.386	-0.376603
NCGC00345447-02	3-Methyladenine	PIK3CA	-1.1	0.5899	5.5	-6.2292	-1.1	0.1321	2.524	-6.8792	0.65	2.976	-0.110432
NCGC00345783-01	17_-hydroxy Wortmannin	PIK3CA	-2.1	6.619	27.582	-5.1792	-2.1	5.8992	8.798	-5.2292	0.05	18.784	0.854178
NCGC00345838-01	GNE-493	PIK3CA	-2.1	1.177	47.021	-5.9292	-2.1	4.6859	18.068	-5.3292	-0.6	28.953	1.47469
NCGC00346484-01	ZSTK-474	PIK3CA	-1.1	0.6619	19.546	-6.1792	-1.1	1.177	12.202	-5.9292	-0.25	7.344	0.156105
NCGC00346492-01	XL-147	PIK3CA	-2.1	7.2374	30.668	-5.1404	-2.1	11.4706	15.835	-4.9404	-0.2	14.833	0.613087
NCGC00346500-01	PIK-75	PIK3CA	-1.1	0.0209	17.282	-7.6792	-1.1	0.0372	2.198	-7.4292	-0.25	15.084	0.628403
NCGC00346508-01	TG-100115	PIK3CA	-2.1	20.931	29.827	-4.6792	-2.1	26.3506	16.174	-4.5792	-0.1	13.653	0.541083
NCGC00346509-01	GSK-615	PIK3CA	-1.1	0.3317	19.769	-6.4792	-1.1	0.6619	3.042	-6.1792	-0.3	16.727	0.728659
NCGC00346614-01	PIK-294	PIK3CA	-1.1	1.6626	15.325	-5.7792	-1.1	1.3207	1.643	-5.8792	0.1	13.682	0.542852
NCGC00346649-01	PKI-402	PIK3CA	-2.1	0.5899	1.429	-6.2292	-2.1	0.2957	3.003	-6.5292	0.3	-1.574	-0.388074
NCGC00346650-01	CH-5132799	PIK3CA	-2.1	5.2576	32.385	-5.2792	-2.1	8.3328	10.205	-5.0792	-0.2	22.18	1.0614
NCGC00262603-01	CAL-101	PIK3CD	-2.1	10.4904	32.28	-4.9792	-1.1	5.8992	9.332	-5.2292	0.25	22.948	1.10827
NCGC00346683-01	YM-201636	PIKFYVE	-2.1	16.6261	2.421	-4.7792	-2.1	16.6261	3.272	-4.7792	0	-0.851	-0.343957
NCGC00263186-02	SGI-1776	PIM1	-2.1	20.931	1.323	-4.6792	-2.1	23.485	2.582	-4.6292	-0.05	-1.259	-0.368853
NCGC00346935-01	CX-6258	PIM1	-2.1	16.6261	0.975	-4.7792	-2.1	9.3495	1.933	-5.0292	0.25	-0.958	-0.350486
NCGC00346465-01	GDC-0349	PIM3	-2.1	1.049	46.357	-5.9792	-1.2	1.6626	44.412	-5.7792	-0.2	1.945	-0.173344
NCGC00253438-01	BI-2536	PLK1	-1.1	0.0526	1.558	-7.2792	-1.1	0.0372	2.577	-7.4292	0.15	-1.019	-0.354208
NCGC00263087-01	Volasertib	PLK1	-1.1	0.3317	1.172	-6.4792	-1.1	0.0662	2.177	-7.1792	0.7	-1.005	-0.353354
NCGC00263112-01	GSK-461364A	PLK1	-1.1	0.0935	-0.554	-7.0292	-1.1	0.059	1.102	-7.2292	0.2	-1.656	-0.393078
NCGC00346511-01	ON-01910	PLK1	-1.1	0.1865	37.673	-6.7292	-1.1	0.1321	16.562	-6.8792	0.15	21.111	0.996173
NCGC00346535-01	IVX-214	PLK1	-1.1	1.4818	32.053	-5.8292	-1.1	0.4686	8.077	-6.3292	0.5	23.976	1.171
NCGC00181336-03	2-Fluoroadenosine	PNP	-1.1	1.3207	16.547	-5.8792	-1.1	0.7427	3.45	-6.1292	0.25	13.097	0.507155
NCGC00160275-01	Resistomycin	POLR2A	-2.1	4.6859	4.298	-5.3292	-1.1	1.177	3.335	-5.9292	0.6	0.963	-0.233266
NCGC00095145-01	Cantharidin	PPP1CA	-1.1	2.6351	17.76	-5.5792	-1.1	2.0931	12.325	-5.6792	0.1	5.435	0.0396173
NCGC00346600-01	Dioscin	PRDX1	-1.1	3.7221	2.798	-5.4292	-1.1	2.0931	4.053	-5.6792	0.25	-1.255	-0.368609
NCGC00162381-03	Thapsigargin	PRKCA	-1.1	1.6626	0.285	-5.7792	-2.1	13.2066	1.193	-4.8792	-0.9	-0.908	-0.347435
NCGC00163451-03	G?-6976	PRKCA	-1.1	0.935	1.655	-6.0292	-1.1	1.049	2.78	-5.9792	-0.05	-1.125	-0.360676
NCGC00238452-02	Enzastaurin	PRKCA	-1.1	11.7704	40.303	-4.9292	-1.1	11.7704	13.534	-4.9292	0	26.769	1.34143
NCGC00262061-02	Ro-31-8425	PRKCA	-2.1	13.2066	0.895	-4.8792	-1.1	10.4904	1.729	-4.9792	0.1	-0.834	-0.342919
NCGC00346806-01	Endoxifen	PRKCA	-2.1	18.6548	3.088	-4.7292	-2.1	18.6548	3.435	-4.7292	0	-0.347	-0.313202
NCGC00347303-01	Englerin A	PRKCA	-2.1	23.485	1.526	-4.6292	-2.1	29.5659	5.016	-4.5292	-0.1	-3.49	-0.504989
NCGC00263119-01	Ruboxistaurin mesilate	PRKCB	-2.1	13.2066	0.028	-4.8792	-2.1	18.6548	0.853	-4.7292	-0.15	-0.825	-0.34237
NCGC00250377-01	NU-7441	PRKDC	-2.1	18.6548	6.54	-4.7292	-2.1	16.6261	3.979	-4.7792	0.05	2.561	-0.135755
NCGC00250387-02	KU 0060648	PRKDC	-2.1	16.6261	-1.513	-4.7792	-2.1	11.7704	-0.442	-4.9292	0.15	-1.071	-0.357381
NCGC00161679-01	MG-132	PSMD1	-1.1	0.2957	2.215	-6.5292	-1.1	0.2957	2.288	-6.5292	0	-0.073	-0.296483
NCGC00242506-02	Bortezomib	PSMD1	-1.1	0.0094	1.533	-8.0292	-1.1	0.0094	2.405	-8.0292	0	-0.872	-0.345238
NCGC00249611-03	Ixazomib	PSMD1	-1.1	0.0662	-0.188	-7.1792	-1.1	0.0526	0.801	-7.2792	0.1	-0.989	-0.352377
NCGC00249612-01	Ixazomib citrate	PSMD1	-1.1	0.0332	3.064	-7.4792	-1.1	0.0372	2.108	-7.4292	-0.05	0.956	-0.233693
NCGC00249613-03	Carfilzomib	PSMD1	-1.1	0.0059	0.074	-8.2292	-1.1	0.0047	0.797	-8.3292	0.1	-0.723	-0.336146
NCGC00344630-01	Marizomib	PSMD1	-1.1	0.0083	3.182	-8.0792	-1.1	0.0105	2.63	-7.9792	-0.1	0.552	-0.258345
NCGC00345799-01	Oprozomib	PSMD1	-1.1	0.059	0.056	-7.2292	-1.1	0.059	1.439	-7.2292	0	-1.383	-0.376419
NCGC00345815-01	MG-115	PSMD1	-1.1	0.7427	2.33	-6.1292	-1.1	0.7427	2.329	-6.1292	0	0.001	-0.291967
NCGC00346469-01	Delanzomib	PSMD1	-1.1	0.0187	-0.64	-7.7292	-1.1	0.0187	0.345	-7.7292	0	-0.985	-0.352133
NCGC00346931-01	NVP-TAE226	PTK2	-2.1	14.818	22.082	-4.8292	-2.1	16.6261	21.89	-4.7792	-0.05	0.192	-0.280312
NCGC00263018-01	NCGC00263018-01	PTK6	-2.1	18.6548	15.903	-4.7292	-2.1	18.6548	19.89	-4.7292	0	-3.987	-0.535317
NCGC00090752-08	Fenretinide	RARB	-1.1	1.0765	1.05	-5.968	-1.1	1.7062	2.446	-5.768	-0.2	-1.396	-0.377213
NCGC00092284-03	AHPN	RARG	-1.1	0.5258	1.572	-6.2792	-1.1	0.3317	1.396	-6.4792	0.2	0.176	-0.281289
NCGC00187983-01	Thiazovivin	ROCK1	-2.1	16.6261	2.192	-4.7792	-2.1	11.7704	3.019	-4.9292	0.15	-0.827	-0.342492
NCGC00263086-01	BI-D1870	RPS6KA1	-2.1	9.3495	19.253	-5.0292	-2.1	7.4266	6.087	-5.1292	0.1	13.166	0.511366
NCGC00250388-01	KRP 203	S1PR1	-2.1	16.6261	2.608	-4.7792	-2.1	23.485	4.267	-4.6292	-0.15	-1.659	-0.393261
NCGC00346691-01	Canagliflozin	SCL5A2	-2.1	23.485	24.357	-4.6292	-2.1	20.931	25.573	-4.6792	0.05	-1.216	-0.366229
NCGC00347954-01	SAG	SHH	-2.1	20.931	-1.316	-4.6792	-2.1	18.6548	0.299	-4.7292	0.05	-1.615	-0.390576
NCGC00090504-10	Isoliquiritigenin	SIRT1	-2.1	18.6548	21.636	-4.7292	-2.1	20.931	12.904	-4.6792	-0.05	8.732	0.240801
NCGC00182052-03	SRT1720	SIRT1	-2.1	11.7704	-1.956	-4.9292	-1.1	7.4266	-0.339	-5.1292	0.2	-1.617	-0.390698
NCGC00015264-08	Clomipramine hydrochloride	SLC6A4	-1.1	0.4176	5.153	-6.3792	-1.1	0.4686	3.729	-6.3292	-0.05	1.424	-0.205135
NCGC00164559-04	Duloxetine hydrochloride	SLC6A4	-1.1	4.1763	0.759	-5.3792	-1.1	8.3328	1.942	-5.0792	-0.3	-1.183	-0.364215
NCGC00263114-01	SCH-900435	SLC6A9	-1.1	0.935	37.464	-6.0292	-1.1	0.7427	19.07	-6.1292	0.1	18.394	0.83038
NCGC00263084-02	Hh-Ag1.5	SMO	-2.1	23.485	-1.622	-4.6292	-2.1	18.6548	-0.663	-4.7292	0.1	-0.959	-0.350547
NCGC00188399-03	Fingolimod hydrochloride	SPHK1	-2.1	14.818	0.71	-4.8292	-2.1	10.4904	1.854	-4.9792	0.15	-1.144	-0.361836
NCGC00346822-01	Idronoxil	SPHK1	-1.1	1.8655	20.704	-5.7292	-1.1	1.6626	7.704	-5.7792	0.05	13	0.501236
NCGC00241099-01	Saracatinib	SRC	-2.1	18.6548	4.293	-4.7292	-2.1	20.931	5.374	-4.6792	-0.05	-1.081	-0.357991
NCGC00242490-02	PD-166285	SRC	-2.1	4.6859	0.299	-5.3292	-1.1	0.5899	1.13	-6.2292	0.9	-0.831	-0.342736
NCGC00345829-01	PD-173955	SRC	-1.1	0.1865	35.348	-6.7292	-1.1	0.0935	8.871	-7.0292	0.3	26.477	1.32361
NCGC00346644-01	KX-01	SRC	-1.1	0.0296	21.303	-7.5292	-1.1	0.0166	4.817	-7.7792	0.25	16.486	0.713953
NCGC00015735-12	Niclosamide	STAT3	-1.1	1.177	3.373	-5.9292	-1.1	0.8333	4.043	-6.0792	0.15	-0.67	-0.332912
NCGC00017223-03	Ursolic acid	STAT3	-2.1	17.0619	1.657	-4.768	-2.1	42.8575	3.084	-4.368	-0.4	-1.427	-0.379104
NCGC00262642-02	WP-1066	STAT3	-1.1	8.3328	2.548	-5.0792	-1.1	4.6859	5.114	-5.3292	0.25	-2.566	-0.448607
NCGC00262829-02	C-188-9	STAT3	-1.1	8.3328	1.4	-5.0792	-1.1	5.8992	1.863	-5.2292	0.15	-0.463	-0.320281
NCGC00345808-01	BP-1-102	STAT3	-2.1	14.818	0.523	-4.8292	-2.1	18.6548	2.087	-4.7292	-0.1	-1.564	-0.387464
NCGC00345811-01	LLL-12	STAT3	-1.1	0.3317	2.784	-6.4792	-1.1	0.3317	4.094	-6.4792	0	-1.31	-0.371965
NCGC00182051-02	R406	SYK	-2.1	13.2066	33.994	-4.8792	-2.1	16.6261	31.546	-4.7792	-0.1	2.448	-0.14265
NCGC00253909-01	PRT-060318	SYK	-2.1	23.485	0.801	-4.6292	-2.1	26.3506	1.253	-4.5792	-0.05	-0.452	-0.31961
NCGC00346945-01	BAY61-3606	SYK	-2.1	4.6859	27.941	-5.3292	-1.2	3.3173	41.136	-5.4792	0.15	-13.195	-1.09719
NCGC00181785-01	Aprepitant	TACR1	-2.1	20.931	7.283	-4.6792	-2.1	16.6261	3.406	-4.7792	0.1	3.877	-0.0554524
NCGC00263110-01	Osanetant	TACR3	-2.1	18.6548	2.925	-4.7292	-2.1	20.931	4.307	-4.6792	-0.05	-1.382	-0.376358
NCGC00346741-01	Travoprost	TBXA2R	-2.1	18.6548	20.949	-4.7292	-2.1	14.818	28.468	-4.8292	0.1	-7.519	-0.75084
NCGC00263199-02	AMG-Tie2-1	TEK	-2.1	23.485	27.135	-4.6292	-2.1	20.931	26.369	-4.6792	0.05	0.766	-0.245287
NCGC00159337-06	Efavirenz	TERT	-2.1	26.3506	9.209	-4.5792	-2.1	18.6548	6.063	-4.7292	0.15	3.146	-0.100058
NCGC00165869-03	Dorsomorphin	TGBR1	-2.1	14.818	-1.008	-4.8292	-2.1	18.6548	0.855	-4.7292	-0.1	-1.863	-0.405709
NCGC00347947-01	ITD-1	TGBR1	-2.1	18.6548	44.011	-4.7292	-2.1	26.3506	31.446	-4.5792	-0.15	12.565	0.474693
NCGC00263017-01	CPG-52364	TLR7	-2.1	1.4818	4.123	-5.8292	-2.1	1.049	1.409	-5.9792	0.15	2.714	-0.126419
NCGC00247624-02	Tanshinone I	TNF	-2.1	16.6261	62.314	-4.7792	-2.1	20.931	23.03	-4.6792	-0.1	39.284	2.1051
NCGC00014925-07	Topotecan hydrochloride	TOP1	-1.1	2.0931	30.703	-5.6792	-1.1	0.0418	8.516	-7.3792	1.7	22.187	1.06183
NCGC00015598-03	beta-Lapachone	TOP1	-2.1	16.6261	-0.012	-4.7792	-2.1	20.931	1.158	-4.6792	-0.1	-1.17	-0.363422
NCGC00016994-16	Camptothecin	TOP1	-1.1	0.1865	37.178	-6.7292	-1.1	0.0094	9.64	-8.0292	1.3	27.538	1.38835
NCGC00095986-02	10-hydroxycamptothecin	TOP1	-1.1	0.3317	33.266	-6.4792	-1.1	0.0209	9.333	-7.6792	1.2	23.933	1.16837
NCGC00167831-01	SN-38	TOP1	-1.1	0.2957	24.473	-6.5292	-1.1	0.0037	6.912	-8.4292	1.9	17.561	0.77955
NCGC00178697-05	Irinotecan	TOP1	-1.1	1.8655	40.251	-5.7292	-1.1	0.3317	15.402	-6.4792	0.75	24.849	1.22427
NCGC00346471-01	Rebeccamycin	TOP1	-1.1	0.7427	41.489	-6.1292	-1.1	0.1482	12.004	-6.8292	0.7	29.485	1.50716
NCGC00015693-08	Mitoxantrone	TOP2A	-1.1	1.8655	20.792	-5.7292	-1.1	0.1663	1.862	-6.7792	1.05	18.93	0.863087
NCGC00024415-39	Doxorubicin	TOP2A	-1.1	0.4176	61.232	-6.3792	-1.1	0.1663	5.625	-6.7792	0.4	55.607	3.10113
NCGC00093976-06	Idarubicin hydrochloride	TOP2A	-1.1	0.6619	1.392	-6.1792	-1.1	0.1482	1.935	-6.8292	0.65	-0.543	-0.325162
NCGC00167503-02	Aclarubicin	TOP2A	-1.1	0.5899	31.46	-6.2292	-1.1	0.935	14.89	-6.0292	-0.2	16.57	0.719079
NCGC00167982-02	Pirarubicin	TOP2A	-2.1	13.2066	26.932	-4.8792	-1.1	1.4818	4.326	-5.8292	0.95	22.606	1.0874
NCGC00263918-04	Epirubicin hydrochloride	TOP2A	-1.1	1.049	49.805	-5.9792	-1.1	0.2635	4.322	-6.5792	0.6	45.483	2.48336
NCGC00346437-01	Vosaroxin	TOP2A	-2.1	12.8702	23.663	-4.8904	-1.1	1.1471	3.947	-5.9404	1.05	19.716	0.911049
NCGC00346513-01	Amonafide	TOP2A	-2.1	18.6548	16.299	-4.7292	-2.1	16.6261	7.274	-4.7792	0.05	9.025	0.25868
NCGC00346563-01	Teniposide	TOP2A	-1.1	4.1763	20.516	-5.3792	-1.1	0.1663	7.361	-6.7792	1.4	13.155	0.510695
NCGC00346881-01	APR-246	TP53	-2.1	16.6261	0.453	-4.7792	-1.1	1.4818	1.703	-5.8292	1.05	-1.25	-0.368304
NCGC00263214-01	HC-067047	TRPV4	-2.1	18.6548	28.758	-4.7292	-2.1	26.3506	9.967	-4.5792	-0.15	18.791	0.854605
NCGC00263090-01	AZ-3146	TTK	-2.1	20.931	1.601	-4.6792	-2.1	20.931	9.727	-4.6792	0	-8.126	-0.78788
NCGC00015647-03	Nocodazole	TUBB	-1.1	0.0083	27.638	-8.0792	-1.1	0.0047	10.14	-8.3292	0.25	17.498	0.775706
NCGC00016388-03	Noscapine	TUBB	-1.1	0.1321	38.52	-6.8792	-1.1	0.0469	10.875	-7.3292	0.45	27.645	1.39488
NCGC00016706-05	Parbendazole	TUBB	-1.1	0.0059	28.412	-8.2292	-1.1	0.0053	16.791	-8.2792	0.05	11.621	0.417089
NCGC00016806-12	Mebendazole	TUBB	-1.1	0.6619	17.949	-6.1792	-1.1	0.3317	10.702	-6.4792	0.3	7.247	0.150186
NCGC00160428-02	Indibulin	TUBB	-1.1	0.0372	48.851	-7.4292	-1.1	0.0235	21.582	-7.6292	0.2	27.269	1.37194
NCGC00161927-03	4-Demethylepipodophyllotoxin	TUBB	-1.1	0.0372	78.185	-7.4292	-1.1	0.0187	17.735	-7.7292	0.3	60.45	3.39665
NCGC00163700-04	Vincristine sulfate	TUBB	-1.1	0.0047	37.863	-8.3292	-1.1	0.0023	9.981	-8.6292	0.3	27.882	1.40934
NCGC00165966-02	Vinorelbine	TUBB	-1.1	0.0209	4.973	-7.6792	-1.1	0.0066	3.269	-8.1792	0.5	1.704	-0.18805
NCGC00166035-02	Demecolcine	TUBB	-1.1	0.0017	39.703	-8.7792	-1.1	0.0015	14.285	-8.8292	0.05	25.418	1.25899
NCGC00185772-01	Vindesine sulfate	TUBB	-1.1	0.0083	37	-8.0792	-1.1	0.0037	17.777	-8.4292	0.35	19.223	0.880966
NCGC00346494-01	E-7010	TUBB	-1.1	0.0526	44.092	-7.2792	-1.1	0.0469	10.419	-7.3292	0.05	33.673	1.76271
NCGC00346580-01	Vinflunine	TUBB	-1.1	0.0023	21.067	-8.6292	-1.1	0.0019	9.903	-8.7292	0.1	11.164	0.389203
NCGC00346731-01	Vinblastine	TUBB	-2.1	20.931	9.829	-4.6792	-2.1	26.3506	4.657	-4.5792	-0.1	5.172	0.023569
NCGC00346805-01	XRP-44X	TUBB	-1.1	0.1321	33.65	-6.8792	-1.1	0.1049	21.456	-6.9792	0.1	12.194	0.452054
NCGC00346937-01	Ombrabulin	TUBB	-1.1	0.0042	38.265	-8.3792	-1.1	0.0026	9.585	-8.5792	0.2	28.68	1.45804
NCGC00160391-02	Auranofin	TXNRD1	-1.1	2.9566	3.815	-5.5292	-1.1	1.6626	3.965	-5.7792	0.25	-0.15	-0.301181
NCGC00160391-05	Auranofin	TXNRD1	-1.1	0.8333	-0.607	-6.0792	-1.1	0.2957	-0.076	-6.5292	0.45	-0.531	-0.32443
NCGC00346876-01	PX-12	TXNRD1	-2.1	11.7704	9.676	-4.9292	-1.1	4.6859	4.911	-5.3292	0.4	4.765	-0.0012663
NCGC00161327-05	Calcitriol	VDR	-1.1	8.3328	4.514	-5.0792	-1.1	7.4266	3.941	-5.1292	0.05	0.573	-0.257064
NCGC00182058-03	Doxercalciferol	VDR	-1.1	2.9566	1.857	-5.5292	-1.1	1.6626	2.597	-5.7792	0.25	-0.74	-0.337183
NCGC00242511-02	Seocalcitol	VDR	-2.1	23.485	1.516	-4.6292	-2.1	18.6548	3.111	-4.7292	0.1	-1.595	-0.389356
NCGC00095055-03	Salinomycin	WNT1	-2.1	5.8992	5.366	-5.2292	-1.1	2.3485	5.778	-5.6292	0.4	-0.412	-0.317169
NCGC00346475-01	Birinapant	XIAP	-2.1	4.6859	18.081	-5.3292	-1.3	8.3328	16.23	-5.0792	-0.25	1.851	-0.17908

## Sheet: CD47 rep zsc delta max resp >1
Sample ID	Name	Target	Curve Class2 CD47 KO	AC50(uM) CD47 KO	Max Resp CD47 KO	Log AC50 CD47 KO	Curve Class2 WT	AC50(uM) WT	Max Resp WT	Log AC50 WT	Delta LogAC50 CD47KO-WT	Delta Max Resp CD47KO -WT	z-score Delta Max Resp CD47KO-WT		Target	p	padj
NCGC00091057-06	Silybin	ABCBA	-2.2	16.6261	40.999	-4.7792	-2.1	16.6261	13.77	-4.7792	0	27.229	1.3695		TUBB	9.58914e-08	1.237e-05
NCGC00274062-01	Zosuquidar trihydrochloride	ABCBA	-2.2	20.931	39.638	-4.6792	-2.1	20.931	17.315	-4.6792	0	22.323	1.07013		TOP1	0.00448525	0.23356
NCGC00346894-01	Valspodar	ABCBA	4	37.2212	83.876	-4.4292	-3	37.2212	56.155	-4.4292	0	27.721	1.39952		CDK1	0.00543162	0.23356
NCGC00263172-01	DCC-2036	ABL1	-1.2	4.1763	41.19	-5.3792	-1.1	9.3495	3.812	-5.0292	-0.35	37.378	1.98879		AURKA	0.0109644	0.353601
NCGC00022567-08	Cladribine	ADA	-2.2	1.049	59.738	-5.9792	-1.3	0.1482	21.67	-6.8292	0.85	38.068	2.03089		AKT1	0.0472831	1
NCGC00163532-01	Daidzin	ADH1	4	0.0372	144.949	-7.4292	4	0.0047	115.579	-8.3292	0.9	29.37	1.50014		FLT1	0.0611718	1
NCGC00263211-01	JK 184	ADH7	-1.2	0.0059	39.212	-8.2292	-1.1	0.0033	13.602	-8.4792	0.25	25.61	1.2707		IMPDH1	0.0967287	1
NCGC00263139-01	Rolofylline	ADORA1	-3	18.6548	84.234	-4.7292	-2.2	20.931	61.315	-4.6792	-0.05	22.919	1.1065		TOP2A	0.120507	1
NCGC00015321-04	Dobutamine hydrochloride	ADRB1	-2.2	16.6261	40.55	-4.7792	-2.1	11.7704	8.698	-4.9292	0.15	31.852	1.65159		JARID2	0.140094	1
NCGC00015558-06	Isoprenaline hydrochloride	ADRB1	-2.2	16.6261	53.781	-4.7792	-2.1	18.6548	7.997	-4.7292	-0.05	45.784	2.50173		NISCH	0.140094	1
NCGC00345785-01	Eprosartan mesylate	AGT	4		90.261		-3	37.2212	63.38	-4.4292	4.4292	26.881	1.34826		ABCBA	0.14663	1
NCGC00024631-01	EBPC	AKR1B1	4	0.0042	122.465	-8.3792	4		100.134		-8.3792	22.331	1.07062		PPARA	0.20031	1
NCGC00092314-04	Triciribine	AKT1	4		120.768		-1.4	0.0166	92.368	-7.7792	7.7792	28.4	1.44095		PARP1	0.255741	1
NCGC00186465-01	MK-2206	AKT1	-2.2	14.818	30.241	-4.8292	-2.1	20.931	1.791	-4.6792	-0.15	28.45	1.444		ALOX5	0.260625	1
NCGC00345795-01	AZD-5363	AKT1	-2.1	7.4266	25.014	-5.1292	-2.1	0.1663	1.231	-6.7792	1.65	23.783	1.15922		CFTR	0.260625	1
NCGC00345822-01	Akt-I-1	AKT1	-2.4	16.6261	72.553	-4.7792	-1.1	2.3485	10.094	-5.6292	0.85	62.459	3.51924		PIK3CB	0.260625	1
NCGC00346450-01	Triciribine phosphate	AKT1	-1.4	0.5899	80.607	-6.2292	-2.2	18.6548	52.513	-4.7292	-1.5	28.094	1.42228		MET	0.352363	1
NCGC00346714-01	GDC-0068	AKT1	-2.1	0.4176	31.005	-6.3792	-2.1	0.3317	2.029	-6.4792	0.1	28.976	1.4761		HIF1A	0.364315	1
NCGC00094201-01	Masoprocol	ALOX5	-2.1	14.818	31.706	-4.8292	-2.1	11.7704	3.946	-4.9292	0.1	27.76	1.4019		MDM2	0.364315	1
NCGC00250374-01	Licofelone	ALOX5	-2.2	26.3506	32.374	-4.5792	-2.1	18.6548	9.166	-4.7292	0.15	23.208	1.12413		TYMS	0.364315	1
NCGC00162249-04	MK-886	ALOX5AP	-2.2	20.931	40.805	-4.6792	-2.1	20.931	13.757	-4.6792	0	27.048	1.35845		IKBKB	0.419052	1
NCGC00346444-01	VE-821	ATR	-1.2	4.6859	64.063	-5.3292	-1.4	5.8992	17.653	-5.2292	-0.1	46.41	2.53993		ERBB2	0.453511	1
NCGC00242482-01	SNS-314	AURKA	-2.2	10.4904	60.794	-4.9792	-2.2	8.3328	31.863	-5.0792	0.1	28.931	1.47335		KIF11	0.453511	1
NCGC00263094-01	AMG-900	AURKA	-2.2	16.6261	52.081	-4.7792	-2.2	11.7704	26.057	-4.9292	0.15	26.024	1.29597		BCL2L1	0.530231	1
NCGC00263151-01	JNJ-7706621	AURKA	-1.2	5.2576	44.022	-5.2792	-1.1	10.4904	4.83	-4.9792	-0.3	39.192	2.09948		PRKDC	0.530231	1
NCGC00263271-02	Alisertib	AURKA	4	1.177	53.002	-5.9292	-2.2	14.818	28.645	-4.8292	-1.1	24.357	1.19424		CASR	0.596215	1
NCGC00346493-01	AT-9283	AURKA	-1.2	4.1763	24.648	-5.3792	-1.1	6.619	2.937	-5.1792	-0.2	21.711	1.03278		HTR2A	0.596215	1
NCGC00346645-01	TAK-901	AURKA	-1.2	4.1763	33.892	-5.3792	-1.1	4.1763	4.465	-5.3792	0	29.427	1.50362		P2RX7	0.596215	1
NCGC00346652-01	PF-03814735	AURKA	-2.1	7.4266	25.285	-5.1292	-2.3	23.485	2.512	-4.6292	-0.5	22.773	1.09759		PfATP6	0.596215	1
NCGC00346657-01	MK-5108	AURKA	-1.2	0.1865	85	-6.7292	-1.2	0.2635	50.854	-6.5792	-0.15	34.146	1.79157		PTGS1	0.596215	1
NCGC00253562-02	ABT-737	BCL2L1	-2.1	14.818	29.852	-4.8292	-1.1	1.8655	1.054	-5.7292	0.9	28.798	1.46524		ADRB1	0.652961	1
NCGC00263208-01	TW-37	BCL2L1	-2.2	14.818	34.779	-4.8292	-1.1	10.4904	13.439	-4.9792	0.15	21.34	1.01015		CYP19A1	0.652961	1
NCGC00263621-02	I-BET762	BRD4	-2.2	6.619	41.586	-5.1792	-2.1	10.4904	9.858	-4.9792	-0.2	31.728	1.64403		IGFR1	0.701758	1
NCGC00167328-02	Aloxistatin	CAPN1	4	0.0042	132.797	-8.3792	4	37.2212	104.466	-4.4292	-3.95	28.331	1.43674		GABRA1	0.810801	1
NCGC00346477-01	Emricasan	CASP1	-2.4	20.931	69.759	-4.6792	-2.1	18.6548	26.974	-4.7292	0.05	42.785	2.31873		PIK3CA	0.875681	1
NCGC00167785-02	PAC-1	CASP3	-1.2	7.4266	41.834	-5.1292	-1.1	4.1763	10.752	-5.3792	0.25	31.082	1.60461		MTOR	0.951923	1
NCGC00344509-01	AC-265347	CASR	4	0.2957	108.022	-6.5292	-3	37.2212	76.539	-4.4292	-2.1	31.483	1.62908		ABL1	1	1
NCGC00344510-02	SB262470 NPS-2143	CASR	4	1.049	97.874	-5.9792	-2.1	26.3506	19.594	-4.5792	-1.4	78.28	4.48465		ADA	1	1
NCGC00263225-01	AG-041R	CCK-B	-2.2	20.931	52.368	-4.6792	-2.1	23.485	9.739	-4.6292	-0.05	42.629	2.30921		ADH1	1	1
NCGC00346723-01	PHA-767491A	CDC7	-1.2	2.0931	50.652	-5.6792	-1.1	5.2576	3.817	-5.2792	-0.4	46.835	2.56586		ADH7	1	1
NCGC00250401-01	Flavopiridol???	CDK1	-1.1	0.059	37.554	-7.2292	-1.1	0.0935	2.486	-7.0292	-0.2	35.068	1.84783		ADORA1	1	1
NCGC00263091-01	AT-7519	CDK1	-1.1	0.3317	27.655	-6.4792	-1.1	0.6619	1.678	-6.1792	-0.3	25.977	1.2931		AGT	1	1
NCGC00263168-01	PHA-793887	CDK1	-1.2	0.935	33.85	-6.0292	-1.1	2.3485	1.453	-5.6292	-0.4	32.397	1.68485		AKR1B1	1	1
NCGC00345809-01	RGB-286147	CDK1	-1.1	0.059	39.37	-7.2292	-1.1	0.1482	1.775	-6.8292	-0.4	37.595	2.00203		ALOX5AP	1	1
NCGC00345852-01	BS-194	CDK1	-1.1	0.2348	43.598	-6.6292	-1.1	0.2635	1.928	-6.5792	-0.05	41.67	2.25069		ATR	1	1
NCGC00346632-01	R-547	CDK1	-1.1	0.5258	36.61	-6.2792	-1.1	2.3485	3.1	-5.6292	-0.65	33.51	1.75276		BRD4	1	1
NCGC00346656-01	Dinaciclib	CDK1	-1.2	0.0332	47.924	-7.4792	-1.1	0.0372	3.92	-7.4292	-0.05	44.004	2.39311		CAPN1	1	1
NCGC00346673-01	Milciclib	CDK1	-1.1	0.7427	34.643	-6.1292	-1.1	1.8655	3.772	-5.7292	-0.4	30.871	1.59173		CASP1	1	1
NCGC00263167-02	SNS-032	CDK2	-1.2	0.1663	34.22	-6.7792	-1.1	0.2348	0.946	-6.6292	-0.15	33.274	1.73836		CASP3	1	1
NCGC00168759-04	PTC-124	CFTR	4		109.291		-2.4	16.6261	77.858	-4.7792	4.7792	31.433	1.62602		CCK-B	1	1
NCGC00346550-01	Lumacaftor	CFTR	-1.1	0.0833	34.976	-7.0792	-1.1	0.0743	4.41	-7.1292	0.05	30.566	1.57312		CDC7	1	1
NCGC00242481-02	AZD-7762	CHEK1	-1.4	0.5899	39.585	-6.2292	-1.1	0.2957	9.778	-6.5292	0.3	29.807	1.52681		CDK2	1	1
NCGC00025012-02	AM-630	CNR2	-2.4	16.6261	36.125	-4.7792	-2.1	18.6548	12.87	-4.7292	-0.05	23.255	1.127		CHEK1	1	1
NCGC00181767-01	Tolcapone	COMT	-3	37.2212	72.927	-4.4292	-3	37.2212	36.753	-4.4292	0	36.174	1.91532		CNR2	1	1
NCGC00263193-01	KI-20227	CSF1R	-2.4	37.2212	42.569	-4.4292	-2.1	23.485	12.143	-4.6292	0.2	30.426	1.56458		COMT	1	1
NCGC00345807-01	CAA0225	CTSL1	-2.2	14.818	41.833	-4.8292	-1.1	9.3495	13.449	-5.0292	0.2	28.384	1.43997		CSF1R	1	1
NCGC00091009-05	Methyltestosterone	CYP19A1	-2.2	48.0869	45.934	-4.318	-2.1	38.1968	19.391	-4.418	0.1	26.543	1.32764		CTSL1	1	1
NCGC00271596-04	Exemestane	CYP19A1	-3	37.2212	77.388	-4.4292	-3	29.5659	48.822	-4.5292	0.1	28.566	1.45108		CYP2C9	1	1
NCGC00017236-08	Baicalein	CYP2C9	-2.4	14.818	91.667	-4.8292	-3	26.3506	63.506	-4.5792	-0.25	28.161	1.42637		DDC	1	1
NCGC00024667-13	Methyldopa	DDC	-1.2	6.619	66.092	-5.1792	-1.1	9.3495	2.736	-5.0292	-0.15	63.356	3.57398		DHFR	1	1
NCGC00025060-16	Methotrexate	DHFR	-1.3	0.0332	54.169	-7.4792	-1.1	0.0469	9.002	-7.3292	-0.15	45.167	2.46408		DHODH	1	1
NCGC00345056-01	Vidofludimus	DHODH	-1.2	1.6626	64.725	-5.7792	-2.3	10.4904	19.287	-4.9792	-0.8	45.438	2.48061		DNMT1	1	1
NCGC00346830-01	NSC-48006	DNMT1	-1.2	0.0332	46.143	-7.4792	-1.1	0.1177	20.924	-6.9292	-0.55	25.219	1.24684		DPYD	1	1
NCGC00181011-01	Gimeracil	DPYD	4		106.453		4	18.6548	83.034	-4.7292	4.7292	23.419	1.13701		DRD1	1	1
NCGC00015444-04	Fenoldopam	DRD1	4		93.129		-3	37.2212	61.271	-4.4292	4.4292	31.858	1.65196		EGFR	1	1
NCGC00346684-01	AG-1024	EGFR	-2.2	18.6548	55.705	-4.7292	-2.1	18.6548	21.585	-4.7292	0	34.12	1.78999		ESR1	1	1
NCGC00346573-01	Sapitinib	ERBB2	-1.2	0.059	42.354	-7.2292	-1.1	0.0469	14.043	-7.3292	0.1	28.311	1.43552		EWSR1	1	1
NCGC00346582-01	Mubritinib	ERBB2	-1.2	0.0332	45.69	-7.4792	-1.2	0.0743	17.243	-7.1292	-0.35	28.447	1.44382		FAS	1	1
NCGC00166111-04	Estriol	ESR1	4		120.332		-3	26.3506	72.648	-4.5792	4.5792	47.684	2.61767		FGF2	1	1
NCGC00346886-01	YK-4-279	EWSR1	-1.1	0.935	38.318	-6.0292	-1.1	0.1663	14.615	-6.7792	0.75	23.703	1.15434		FLT3	1	1
NCGC00163492-04	Cerulenin	FAS	-2.4	26.3506	39.947	-4.5792	-3	26.3506	10.602	-4.5792	0	29.345	1.49861		GRIN2A	1	1
NCGC00263125-01	SG-00529	FGF2	-2.2	23.485	39.325	-4.6292	-2.3	20.931	14.623	-4.6792	0.05	24.702	1.2153		GSK3B	1	1
NCGC00241113-01	Orantinib	FLT1	-2.2	16.6261	36.73	-4.7792	-1.1	1.4818	6.657	-5.8292	1.05	30.073	1.54304		GSTP1	1	1
NCGC00249390-01	Tivozanib	FLT1	-2.1	26.3506	30.389	-4.5792	-2.1	13.2066	8.955	-4.8792	0.3	21.434	1.01588		HCN	1	1
NCGC00263156-02	Vargatef	FLT1	-2.2	14.818	50.125	-4.8292	-1.1	3.3173	12.253	-5.4792	0.65	37.872	2.01893		HCRTR1	1	1
NCGC00263198-01	Lenvatinib	FLT1	-2.2	16.6261	51.428	-4.7792	-1.1	2.6351	5.012	-5.5792	0.8	46.416	2.54029		HDAC8	1	1
NCGC00263205-01	Motesanib	FLT1	-3	37.2212	68.692	-4.4292	-2.3	20.931	21.286	-4.6792	0.25	47.406	2.6007		HMGCR	1	1
NCGC00345847-01	JNJ-38158471	FLT1	-1.2	4.1763	64.339	-5.3792	-1.1	3.7221	28.354	-5.4292	0.05	35.985	1.90379		HRH1	1	1
NCGC00346964-01	HMSL10084	FLT3	-1.1	0.4686	24.556	-6.3292	-1.1	0.4686	2.486	-6.3292	0	22.07	1.05469		HSPA2	1	1
NCGC00095694-05	Osthol	GABRA1	-1.2	1.3207	60.073	-5.8792	-1.1	2.6351	35.688	-5.5792	-0.3	24.385	1.19595		HTR1A	1	1
NCGC00346604-01	Dihydromyricetin	GABRA1	-1.2	1.3207	36.707	-5.8792	-2.1	13.2066	15.036	-4.8792	-1	21.671	1.03034		HTR1B	1	1
NCGC00015937-02	Spermidine	GRIN2A	4		82.208		-2.1	20.931	20.847	-4.6792	4.6792	61.361	3.45224		IRAK1	1	1
NCGC00346638-01	TWS-119	GSK3B	-1.1	5.2576	41.471	-5.2792	-1.1	2.9566	15.256	-5.5292	0.25	26.215	1.30762		JAK1	1	1
NCGC00263221-01	Ezatiostat	GSTP1	4	10.4904	113.889	-4.9792	-3	26.3506	68.407	-4.5792	-0.4	45.482	2.4833		JAK2	1	1
NCGC00024929-01	ICI-D7288	HCN	-3	26.3506	27.963	-4.5792	-3	37.2212	5.518	-4.4292	-0.15	22.445	1.07757		KCNH2	1	1
NCGC00025330-01	SB-408124	HCRTR1	-2.4	29.5659	50.614	-4.5292	-2.1	16.6261	23.067	-4.7792	0.25	27.547	1.3889		KCNQ1	1	1
NCGC00345492-02	PCI-34051	HDAC8	-2.2	11.7704	74.801	-4.9292	-1.2	8.3328	33.723	-5.0792	0.15	41.078	2.21457		LCK	1	1
NCGC00025300-01	2-Methoxyestradiol	HIF1A	-2.4	6.619	45.435	-5.1792	-1.1	0.4686	21.899	-6.3292	1.15	23.536	1.14415		MAOA	1	1
NCGC00344625-02	IOX2	HIF1A	4		113.814		4	18.6548	89.375	-4.7292	4.7292	24.439	1.19925		MAP1LC3A	1	1
NCGC00160531-01	Atorvastatin calcium	HMGCR	-2.2	20.931	57.007	-4.6792	-2.2	20.931	34.989	-4.6792	0	22.018	1.05152		MAP2K1	1	1
NCGC00181013-01	Mizolastine	HRH1	-1.4	0.001	89.324	-8.9792	-2.2	20.931	60.168	-4.6792	-4.3	29.156	1.48708		MAPK7	1	1
NCGC00263280-01	Ac-SAH-p53-8	HSPA2	-2.2	23.485	37.723	-4.6292	-2.1	26.3506	11.534	-4.5792	-0.05	26.189	1.30603		MAPK8	1	1
NCGC00018193-06	Fluvoxamine maleate	HTR1A	-2.2	23.485	34.845	-4.6292	-2.1	26.3506	0.209	-4.5792	-0.05	34.636	1.82147		MMP1	1	1
NCGC00095899-04	Rizatriptan benzoate	HTR1B	4	11.7704	83.76	-4.9292	-2.2	13.2066	62.211	-4.8792	-0.05	21.549	1.0229		MMP13	1	1
NCGC00015004-11	Amoxapine	HTR2A	-3	23.485	60.648	-4.6292	-3	37.2212	28.037	-4.4292	-0.2	32.611	1.69791		MPL	1	1
NCGC00263539-03	Ziprasidone hydrochloride	HTR2A	-3	23.485	42.21	-4.6292	-3	26.3506	17.586	-4.5792	-0.05	24.624	1.21054		MT-CO1	1	1
NCGC00022001-14	Picropodophyllin	IGFR1	4		37.377		4	0.0066	12.497	-8.1792	8.1792	24.88	1.22616		NR1D1	1	1
NCGC00346453-01	BMS-754807	IGFR1	4	14.818	82.867	-4.8292	-2.2	7.4266	47.422	-5.1292	0.3	35.445	1.87084		P2RX3	1	1
NCGC00165761-02	BMS-345541	IKBKB	-2.1	14.818	23.272	-4.8292	-2.1	16.6261	1.923	-4.7792	-0.05	21.349	1.0107		PDE4A	1	1
NCGC00165873-02	PS-1145	IKBKB	-3	37.2212	97.256	-4.4292	-3	37.2212	67.733	-4.4292	0	29.523	1.50948		PGR	1	1
NCGC00263213-01	PF-184	IKBKB	-1.2	4.1763	51.177	-5.3792	-1.1	6.619	15.645	-5.1792	-0.2	35.532	1.87615		PIK3CD	1	1
NCGC00016786-14	Mycophenolic acid	IMPDH1	-1.2	2.3485	58.678	-5.6292	-1.1	1.049	19.34	-5.9792	0.35	39.338	2.10839		PLA2G5	1	1
NCGC00090726-11	Ribavirin	IMPDH1	4	0.001	113.259	-8.9792	-3	37.2212	82.278	-4.4292	-4.55	30.981	1.59844		PLK1	1	1
NCGC00159459-02	Mycophenolate mofetil	IMPDH1	-1.2	2.6351	71.329	-5.5792	-1.1	1.4818	19.156	-5.8292	0.25	52.173	2.89159		POLR2A	1	1
[truncated: 165 more rows]

## Sheet: CD47 enha zsc delta max resp<-1
Sample ID	Name	Target	Curve Class2 CD47 KO	AC50(uM) CD47 KO	Max Resp CD47 KO	Log AC50 CD47 KO	Curve Class2 WT	AC50(uM) WT	Max Resp WT	Log AC50 WT	Delta LogAC50 CD47KO-WT	Delta Max Resp CD47KO -WT	z-score Delta Max Resp CD47KO-WT		Target	p	padj
[truncated: 213 more rows]

[truncated: 2 more sheets: CD47 rep delta logAc50 >0.5, CD47 enh delta logAC50 <-0.5]
